# Supplementary material
Source: Research Square preprint supplement (doi:10.21203/rs.3.rs-9280905/v1)
Supplement: Supplementary file 1 [file 000258b2530de596dc883d9f.xlsx]

## Sheet: Table-S1
ST1. Orinig and termination events trimmed to 2kb.
Chromosome	Start	End	Event
TcChr10-S	20374	22374	Origin
TcChr10-S	22634	24634	Origin
TcChr10-S	31944	33944	Origin
TcChr10-S	31270	33270	Origin
TcChr10-S	31865	33865	Origin
TcChr10-S	33145	35145	Origin
TcChr10-S	32626	34626	Origin
TcChr10-S	34173	36173	Origin
TcChr10-S	38869	40869	Origin
TcChr10-S	39436	41436	Origin
TcChr10-S	38711	40711	Origin
TcChr10-S	45873	47873	Origin
TcChr10-S	46938	48938	Origin
TcChr10-S	47822	49822	Origin
TcChr10-S	49694	51694	Origin
TcChr10-S	54914	56914	Origin
TcChr10-S	61415	63415	Origin
TcChr10-S	104821	106821	Origin
TcChr10-S	107987	109987	Origin
TcChr10-S	142077	144077	Origin
TcChr10-S	149363	151363	Origin
TcChr10-S	154267	156267	Origin
TcChr10-S	156187	158187	Origin
TcChr10-S	157999	159999	Origin
TcChr10-S	156253	158253	Origin
TcChr10-S	157321	159321	Origin
TcChr10-S	158497	160497	Origin
TcChr10-S	160239	162239	Origin
TcChr10-S	162538	164538	Origin
TcChr10-S	163744	165744	Origin
TcChr10-S	167774	169774	Origin
TcChr10-S	169969	171969	Origin
TcChr10-S	169922	171922	Origin
TcChr10-S	175092	177092	Origin
TcChr10-S	175070	177070	Origin
TcChr10-S	175872	177872	Origin
TcChr10-S	180351	182351	Origin
TcChr10-S	177009	179009	Origin
TcChr10-S	179367	181367	Origin
TcChr10-S	181323	183323	Origin
TcChr10-S	185169	187169	Origin
TcChr10-S	188448	190448	Origin
TcChr10-S	189708	191708	Origin
TcChr10-S	190007	192007	Origin
TcChr10-S	195569	197569	Origin
TcChr10-S	196767	198767	Origin
TcChr10-S	258597	260597	Origin
TcChr10-S	263226	265226	Origin
TcChr10-S	264820	266820	Origin
TcChr10-S	271329	273329	Origin
TcChr10-S	274405	276405	Origin
TcChr10-S	275041	277041	Origin
TcChr10-S	299762	301762	Origin
TcChr10-S	309771	311771	Origin
TcChr10-S	318393	320393	Origin
TcChr10-S	329860	331860	Origin
TcChr10-S	333616	335616	Origin
TcChr10-S	345787	347787	Origin
TcChr10-S	351575	353575	Origin
TcChr10-S	360802	362802	Origin
TcChr10-S	373539	375539	Origin
TcChr10-S	385570	387570	Origin
TcChr10-S	393443	395443	Origin
TcChr10-S	421265	423265	Origin
TcChr10-S	434365	436365	Origin
TcChr10-S	467197	469197	Origin
TcChr11-S	4478	6478	Origin
TcChr11-S	19645	21645	Origin
TcChr11-S	20951	22951	Origin
TcChr11-S	24567	26567	Origin
TcChr11-S	29850	31850	Origin
TcChr11-S	37496	39496	Origin
TcChr11-S	40000	42000	Origin
TcChr11-S	82263	84263	Origin
TcChr11-S	145890	147890	Origin
TcChr11-S	153476	155476	Origin
TcChr11-S	154485	156485	Origin
TcChr11-S	153587	155587	Origin
TcChr11-S	158313	160313	Origin
TcChr11-S	164497	166497	Origin
TcChr11-S	165051	167051	Origin
TcChr11-S	165880	167880	Origin
TcChr11-S	169731	171731	Origin
TcChr11-S	169744	171744	Origin
TcChr11-S	177036	179036	Origin
TcChr11-S	180356	182356	Origin
TcChr11-S	181717	183717	Origin
TcChr11-S	196265	198265	Origin
TcChr11-S	196174	198174	Origin
TcChr11-S	198306	200306	Origin
TcChr11-S	200722	202722	Origin
TcChr11-S	206615	208615	Origin
TcChr11-S	213080	215080	Origin
TcChr11-S	220093	222093	Origin
TcChr11-S	233568	235568	Origin
TcChr11-S	236882	238882	Origin
TcChr11-S	248874	250874	Origin
TcChr11-S	261088	263088	Origin
TcChr11-S	262488	264488	Origin
TcChr11-S	267960	269960	Origin
TcChr11-S	267250	269250	Origin
TcChr11-S	269005	271005	Origin
TcChr11-S	276404	278404	Origin
TcChr11-S	276443	278443	Origin
TcChr11-S	281139	283139	Origin
TcChr11-S	283827	285827	Origin
TcChr11-S	283843	285843	Origin
TcChr11-S	284899	286899	Origin
TcChr11-S	286632	288632	Origin
TcChr11-S	288267	290267	Origin
TcChr11-S	289459	291459	Origin
TcChr11-S	290187	292187	Origin
TcChr11-S	298583	300583	Origin
TcChr11-S	297535	299535	Origin
TcChr11-S	298233	300233	Origin
TcChr11-S	305331	307331	Origin
TcChr11-S	306133	308133	Origin
TcChr11-S	309279	311279	Origin
TcChr11-S	308454	310454	Origin
TcChr11-S	312858	314858	Origin
TcChr11-S	339732	341732	Origin
TcChr11-S	342930	344930	Origin
TcChr11-S	342649	344649	Origin
TcChr11-S	348964	350964	Origin
TcChr11-S	349079	351079	Origin
TcChr11-S	349932	351932	Origin
TcChr11-S	350575	352575	Origin
TcChr11-S	356491	358491	Origin
TcChr11-S	359862	361862	Origin
TcChr11-S	359420	361420	Origin
TcChr11-S	362712	364712	Origin
TcChr11-S	364778	366778	Origin
TcChr11-S	392906	394906	Origin
TcChr11-S	407159	409159	Origin
TcChr11-S	409988	411988	Origin
TcChr11-S	421219	423219	Origin
TcChr11-S	429433	431433	Origin
TcChr11-S	437217	439217	Origin
TcChr11-S	439243	441243	Origin
TcChr11-S	443650	445650	Origin
TcChr11-S	446809	448809	Origin
TcChr11-S	444640	446640	Origin
TcChr11-S	445401	447401	Origin
TcChr11-S	449207	451207	Origin
TcChr11-S	458176	460176	Origin
TcChr11-S	462087	464087	Origin
TcChr11-S	472644	474644	Origin
TcChr11-S	473654	475654	Origin
TcChr11-S	476344	478344	Origin
TcChr11-S	485077	487077	Origin
TcChr11-S	484884	486884	Origin
TcChr11-S	496303	498303	Origin
TcChr12-S	2747	4747	Origin
TcChr12-S	1869	3869	Origin
TcChr12-S	12343	14343	Origin
TcChr12-S	13027	15027	Origin
TcChr12-S	48257	50257	Origin
TcChr12-S	47195	49195	Origin
TcChr12-S	48494	50494	Origin
TcChr12-S	62085	64085	Origin
TcChr12-S	106809	108809	Origin
TcChr12-S	107346	109346	Origin
TcChr12-S	107704	109704	Origin
TcChr12-S	120213	122213	Origin
TcChr12-S	119999	121999	Origin
TcChr12-S	120365	122365	Origin
TcChr12-S	127279	129279	Origin
TcChr12-S	127207	129207	Origin
TcChr12-S	127321	129321	Origin
TcChr12-S	130144	132144	Origin
TcChr12-S	149748	151748	Origin
TcChr12-S	151092	153092	Origin
TcChr12-S	154501	156501	Origin
TcChr12-S	158771	160771	Origin
TcChr12-S	163362	165362	Origin
TcChr12-S	163045	165045	Origin
TcChr12-S	166040	168040	Origin
TcChr12-S	174024	176024	Origin
TcChr12-S	183176	185176	Origin
TcChr12-S	185074	187074	Origin
TcChr12-S	185268	187268	Origin
TcChr12-S	184949	186949	Origin
TcChr12-S	186414	188414	Origin
TcChr12-S	192911	194911	Origin
TcChr12-S	199941	201941	Origin
TcChr12-S	199952	201952	Origin
TcChr12-S	204052	206052	Origin
TcChr12-S	203762	205762	Origin
TcChr12-S	203345	205345	Origin
TcChr12-S	210466	212466	Origin
TcChr12-S	217400	219400	Origin
TcChr12-S	217618	219618	Origin
TcChr12-S	221578	223578	Origin
TcChr12-S	222500	224500	Origin
TcChr12-S	223239	225239	Origin
TcChr12-S	225621	227621	Origin
TcChr12-S	226209	228209	Origin
TcChr12-S	227673	229673	Origin
TcChr12-S	228302	230302	Origin
TcChr12-S	230573	232573	Origin
TcChr12-S	236411	238411	Origin
TcChr12-S	241947	243947	Origin
TcChr12-S	243541	245541	Origin
TcChr12-S	248710	250710	Origin
TcChr12-S	248512	250512	Origin
TcChr12-S	257627	259627	Origin
TcChr12-S	288098	290098	Origin
TcChr12-S	286746	288746	Origin
TcChr12-S	290749	292749	Origin
TcChr12-S	294755	296755	Origin
TcChr12-S	296496	298496	Origin
TcChr12-S	294565	296565	Origin
TcChr12-S	312617	314617	Origin
TcChr12-S	333631	335631	Origin
TcChr12-S	343554	345554	Origin
TcChr12-S	350738	352738	Origin
TcChr12-S	352465	354465	Origin
TcChr12-S	354948	356948	Origin
TcChr12-S	361295	363295	Origin
TcChr12-S	367350	369350	Origin
TcChr12-S	386102	388102	Origin
TcChr12-S	386927	388927	Origin
TcChr12-S	395719	397719	Origin
TcChr12-S	394634	396634	Origin
TcChr12-S	402841	404841	Origin
TcChr12-S	400444	402444	Origin
TcChr12-S	413926	415926	Origin
TcChr12-S	415377	417377	Origin
TcChr12-S	420135	422135	Origin
TcChr12-S	421179	423179	Origin
TcChr12-S	438588	440588	Origin
TcChr12-S	446394	448394	Origin
TcChr12-S	463487	465487	Origin
TcChr13-S	13791	15791	Origin
TcChr13-S	14787	16787	Origin
TcChr13-S	22388	24388	Origin
TcChr13-S	24236	26236	Origin
TcChr13-S	26039	28039	Origin
TcChr13-S	26100	28100	Origin
TcChr13-S	144322	146322	Origin
TcChr13-S	145303	147303	Origin
TcChr13-S	148804	150804	Origin
TcChr13-S	159834	161834	Origin
TcChr13-S	159636	161636	Origin
TcChr13-S	160945	162945	Origin
TcChr13-S	171236	173236	Origin
TcChr13-S	172697	174697	Origin
TcChr13-S	178442	180442	Origin
TcChr13-S	180082	182082	Origin
TcChr13-S	186535	188535	Origin
TcChr13-S	186479	188479	Origin
TcChr13-S	192755	194755	Origin
TcChr13-S	193252	195252	Origin
TcChr13-S	197902	199902	Origin
TcChr13-S	202609	204609	Origin
TcChr13-S	206864	208864	Origin
TcChr13-S	211221	213221	Origin
TcChr13-S	213486	215486	Origin
TcChr13-S	213182	215182	Origin
TcChr13-S	221618	223618	Origin
TcChr13-S	223655	225655	Origin
TcChr13-S	225499	227499	Origin
TcChr13-S	228942	230942	Origin
TcChr13-S	234882	236882	Origin
TcChr13-S	245363	247363	Origin
TcChr13-S	261317	263317	Origin
TcChr13-S	272135	274135	Origin
TcChr13-S	272542	274542	Origin
TcChr13-S	272855	274855	Origin
TcChr13-S	284278	286278	Origin
TcChr13-S	287878	289878	Origin
TcChr13-S	296125	298125	Origin
TcChr13-S	302439	304439	Origin
TcChr13-S	310221	312221	Origin
TcChr13-S	315459	317459	Origin
TcChr13-S	324794	326794	Origin
TcChr13-S	324821	326821	Origin
TcChr13-S	334791	336791	Origin
TcChr13-S	334123	336123	Origin
TcChr13-S	336720	338720	Origin
TcChr13-S	346644	348644	Origin
TcChr13-S	348643	350643	Origin
TcChr13-S	351501	353501	Origin
TcChr13-S	353355	355355	Origin
TcChr13-S	364610	366610	Origin
TcChr13-S	370813	372813	Origin
TcChr13-S	391332	393332	Origin
TcChr13-S	394327	396327	Origin
TcChr13-S	392621	394621	Origin
TcChr13-S	407967	409967	Origin
TcChr13-S	409804	411804	Origin
TcChr13-S	409989	411989	Origin
TcChr13-S	411340	413340	Origin
TcChr13-S	413881	415881	Origin
TcChr13-S	416063	418063	Origin
TcChr13-S	426611	428611	Origin
TcChr13-S	431230	433230	Origin
TcChr13-S	432195	434195	Origin
TcChr13-S	433575	435575	Origin
TcChr13-S	436088	438088	Origin
TcChr13-S	438448	440448	Origin
TcChr13-S	439210	441210	Origin
TcChr13-S	444169	446169	Origin
TcChr13-S	444737	446737	Origin
TcChr13-S	448269	450269	Origin
TcChr13-S	447451	449451	Origin
TcChr13-S	447751	449751	Origin
TcChr13-S	450209	452209	Origin
TcChr13-S	453038	455038	Origin
TcChr13-S	454847	456847	Origin
TcChr13-S	455142	457142	Origin
TcChr13-S	454527	456527	Origin
TcChr13-S	461920	463920	Origin
TcChr13-S	467285	469285	Origin
TcChr13-S	480090	482090	Origin
TcChr13-S	480671	482671	Origin
TcChr13-S	481334	483334	Origin
TcChr13-S	482084	484084	Origin
TcChr13-S	482384	484384	Origin
TcChr13-S	483470	485470	Origin
TcChr13-S	488095	490095	Origin
TcChr13-S	517345	519345	Origin
TcChr13-S	523087	525087	Origin
TcChr13-S	544252	546252	Origin
TcChr13-S	546040	548040	Origin
TcChr14-S	40282	42282	Origin
TcChr14-S	41100	43100	Origin
TcChr14-S	56572	58572	Origin
TcChr14-S	63387	65387	Origin
TcChr14-S	63306	65306	Origin
TcChr14-S	63807	65807	Origin
TcChr14-S	82844	84844	Origin
TcChr14-S	76145	78145	Origin
TcChr14-S	78666	80666	Origin
TcChr14-S	114716	116716	Origin
TcChr14-S	122366	124366	Origin
TcChr14-S	129973	131973	Origin
TcChr14-S	140022	142022	Origin
TcChr14-S	138500	140500	Origin
TcChr14-S	139805	141805	Origin
TcChr14-S	141647	143647	Origin
TcChr14-S	141941	143941	Origin
TcChr14-S	142156	144156	Origin
TcChr14-S	144928	146928	Origin
TcChr14-S	145821	147821	Origin
TcChr14-S	149070	151070	Origin
TcChr14-S	163639	165639	Origin
TcChr14-S	168715	170715	Origin
TcChr14-S	169459	171459	Origin
TcChr14-S	175868	177868	Origin
TcChr14-S	177885	179885	Origin
TcChr14-S	185144	187144	Origin
TcChr14-S	184739	186739	Origin
TcChr14-S	184378	186378	Origin
TcChr14-S	188441	190441	Origin
TcChr14-S	197282	199282	Origin
TcChr14-S	198049	200049	Origin
TcChr14-S	201840	203840	Origin
TcChr14-S	200681	202681	Origin
TcChr14-S	235069	237069	Origin
TcChr14-S	239801	241801	Origin
TcChr14-S	259688	261688	Origin
TcChr14-S	265195	267195	Origin
TcChr14-S	274397	276397	Origin
TcChr14-S	277665	279665	Origin
TcChr14-S	279793	281793	Origin
TcChr14-S	281097	283097	Origin
TcChr14-S	283415	285415	Origin
TcChr14-S	285287	287287	Origin
TcChr14-S	301166	303166	Origin
TcChr14-S	301845	303845	Origin
TcChr14-S	302681	304681	Origin
TcChr14-S	308333	310333	Origin
TcChr14-S	310241	312241	Origin
TcChr14-S	312186	314186	Origin
TcChr14-S	312671	314671	Origin
TcChr14-S	314006	316006	Origin
TcChr14-S	317139	319139	Origin
TcChr14-S	328595	330595	Origin
TcChr14-S	366447	368447	Origin
TcChr14-S	367551	369551	Origin
TcChr14-S	385505	387505	Origin
TcChr14-S	390736	392736	Origin
TcChr14-S	391953	393953	Origin
TcChr14-S	402575	404575	Origin
TcChr14-S	406938	408938	Origin
TcChr14-S	408386	410386	Origin
TcChr14-S	409813	411813	Origin
TcChr14-S	411461	413461	Origin
TcChr14-S	425159	427159	Origin
TcChr14-S	428147	430147	Origin
TcChr14-S	431591	433591	Origin
TcChr14-S	447796	449796	Origin
TcChr14-S	453406	455406	Origin
TcChr14-S	453650	455650	Origin
TcChr14-S	464533	466533	Origin
TcChr14-S	466057	468057	Origin
TcChr14-S	469674	471674	Origin
TcChr14-S	478428	480428	Origin
TcChr14-S	476168	478168	Origin
TcChr14-S	479158	481158	Origin
TcChr14-S	482235	484235	Origin
TcChr14-S	482920	484920	Origin
TcChr14-S	490756	492756	Origin
TcChr14-S	492344	494344	Origin
TcChr14-S	509459	511459	Origin
TcChr14-S	509876	511876	Origin
TcChr14-S	510597	512597	Origin
TcChr14-S	511434	513434	Origin
TcChr14-S	514018	516018	Origin
TcChr14-S	514811	516811	Origin
TcChr14-S	523163	525163	Origin
TcChr14-S	528141	530141	Origin
TcChr14-S	529812	531812	Origin
TcChr14-S	529498	531498	Origin
TcChr14-S	533883	535883	Origin
TcChr14-S	538002	540002	Origin
TcChr14-S	539777	541777	Origin
TcChr14-S	543854	545854	Origin
TcChr14-S	551000	553000	Origin
TcChr14-S	552629	554629	Origin
TcChr14-S	553753	555753	Origin
TcChr14-S	555020	557020	Origin
TcChr15-S	5986	7986	Origin
TcChr15-S	24074	26074	Origin
TcChr15-S	29143	31143	Origin
TcChr15-S	29851	31851	Origin
TcChr15-S	33520	35520	Origin
TcChr15-S	35290	37290	Origin
TcChr15-S	46689	48689	Origin
TcChr15-S	51731	53731	Origin
TcChr15-S	57705	59705	Origin
TcChr15-S	63981	65981	Origin
TcChr15-S	84245	86245	Origin
TcChr15-S	90450	92450	Origin
TcChr15-S	91372	93372	Origin
TcChr15-S	93597	95597	Origin
TcChr15-S	93687	95687	Origin
TcChr15-S	108647	110647	Origin
TcChr15-S	110519	112519	Origin
TcChr15-S	122433	124433	Origin
TcChr15-S	139726	141726	Origin
TcChr15-S	138696	140696	Origin
TcChr15-S	268145	270145	Origin
TcChr15-S	268274	270274	Origin
TcChr15-S	275623	277623	Origin
TcChr15-S	286957	288957	Origin
TcChr15-S	285947	287947	Origin
TcChr15-S	292844	294844	Origin
TcChr15-S	294051	296051	Origin
TcChr15-S	311989	313989	Origin
TcChr15-S	317768	319768	Origin
TcChr15-S	322056	324056	Origin
TcChr15-S	327360	329360	Origin
TcChr15-S	327770	329770	Origin
TcChr15-S	331423	333423	Origin
TcChr15-S	331585	333585	Origin
TcChr15-S	334835	336835	Origin
TcChr15-S	346670	348670	Origin
TcChr15-S	351898	353898	Origin
TcChr15-S	375170	377170	Origin
TcChr15-S	378485	380485	Origin
TcChr15-S	383683	385683	Origin
TcChr15-S	397778	399778	Origin
TcChr15-S	398877	400877	Origin
TcChr16-S	89977	91977	Origin
TcChr16-S	113327	115327	Origin
TcChr16-S	115188	117188	Origin
TcChr16-S	133498	135498	Origin
TcChr16-S	160789	162789	Origin
TcChr16-S	162340	164340	Origin
TcChr16-S	171692	173692	Origin
TcChr16-S	172528	174528	Origin
TcChr16-S	174746	176746	Origin
TcChr16-S	185320	187320	Origin
TcChr16-S	182616	184616	Origin
TcChr16-S	186071	188071	Origin
TcChr16-S	191813	193813	Origin
TcChr16-S	195727	197727	Origin
TcChr16-S	199889	201889	Origin
TcChr16-S	202074	204074	Origin
TcChr16-S	211505	213505	Origin
TcChr16-S	216283	218283	Origin
TcChr16-S	222323	224323	Origin
TcChr16-S	239889	241889	Origin
TcChr16-S	253186	255186	Origin
TcChr16-S	253952	255952	Origin
TcChr16-S	262208	264208	Origin
TcChr16-S	264918	266918	Origin
TcChr16-S	265650	267650	Origin
TcChr16-S	276656	278656	Origin
TcChr16-S	283831	285831	Origin
TcChr16-S	286719	288719	Origin
TcChr16-S	289747	291747	Origin
TcChr16-S	296948	298948	Origin
TcChr16-S	299628	301628	Origin
TcChr16-S	298954	300954	Origin
TcChr16-S	319344	321344	Origin
TcChr16-S	321532	323532	Origin
TcChr16-S	329245	331245	Origin
TcChr16-S	372808	374808	Origin
TcChr16-S	374411	376411	Origin
TcChr16-S	376538	378538	Origin
TcChr16-S	376311	378311	Origin
TcChr16-S	407883	409883	Origin
TcChr16-S	408723	410723	Origin
TcChr16-S	409023	411023	Origin
TcChr16-S	425647	427647	Origin
TcChr16-S	434565	436565	Origin
TcChr16-S	435036	437036	Origin
TcChr16-S	438302	440302	Origin
TcChr16-S	440268	442268	Origin
TcChr16-S	447969	449969	Origin
TcChr16-S	480231	482231	Origin
TcChr16-S	485394	487394	Origin
TcChr16-S	500954	502954	Origin
TcChr16-S	510017	512017	Origin
TcChr16-S	511416	513416	Origin
TcChr16-S	511696	513696	Origin
TcChr16-S	520350	522350	Origin
TcChr16-S	526277	528277	Origin
TcChr16-S	531639	533639	Origin
TcChr16-S	532535	534535	Origin
TcChr16-S	534623	536623	Origin
TcChr16-S	536012	538012	Origin
TcChr16-S	537228	539228	Origin
TcChr16-S	536846	538846	Origin
TcChr16-S	550882	552882	Origin
TcChr16-S	557049	559049	Origin
TcChr16-S	563095	565095	Origin
TcChr16-S	567750	569750	Origin
TcChr16-S	567485	569485	Origin
TcChr16-S	571130	573130	Origin
TcChr16-S	587580	589580	Origin
TcChr16-S	592174	594174	Origin
TcChr16-S	592203	594203	Origin
TcChr16-S	593151	595151	Origin
TcChr16-S	603457	605457	Origin
TcChr16-S	617689	619689	Origin
TcChr17-S	3406	5406	Origin
TcChr17-S	6463	8463	Origin
TcChr17-S	125716	127716	Origin
TcChr17-S	126240	128240	Origin
TcChr17-S	130200	132200	Origin
TcChr17-S	137995	139995	Origin
TcChr17-S	147065	149065	Origin
TcChr17-S	150915	152915	Origin
TcChr17-S	153432	155432	Origin
TcChr17-S	176110	178110	Origin
TcChr17-S	182033	184033	Origin
TcChr17-S	200906	202906	Origin
TcChr17-S	202338	204338	Origin
TcChr17-S	203632	205632	Origin
TcChr17-S	211666	213666	Origin
TcChr17-S	256397	258397	Origin
TcChr17-S	264706	266706	Origin
TcChr17-S	265849	267849	Origin
TcChr17-S	267446	269446	Origin
TcChr17-S	272764	274764	Origin
TcChr17-S	273699	275699	Origin
TcChr17-S	281349	283349	Origin
TcChr17-S	285423	287423	Origin
TcChr17-S	290825	292825	Origin
TcChr17-S	292652	294652	Origin
TcChr17-S	294883	296883	Origin
TcChr17-S	303294	305294	Origin
TcChr17-S	304188	306188	Origin
TcChr17-S	306618	308618	Origin
TcChr17-S	314026	316026	Origin
TcChr17-S	322889	324889	Origin
TcChr17-S	329237	331237	Origin
TcChr17-S	333297	335297	Origin
TcChr17-S	336627	338627	Origin
TcChr17-S	344356	346356	Origin
TcChr17-S	343258	345258	Origin
TcChr17-S	347169	349169	Origin
TcChr17-S	348113	350113	Origin
TcChr17-S	361319	363319	Origin
TcChr17-S	367987	369987	Origin
TcChr17-S	407426	409426	Origin
TcChr17-S	406872	408872	Origin
TcChr17-S	413604	415604	Origin
TcChr17-S	427139	429139	Origin
TcChr17-S	439534	441534	Origin
TcChr17-S	440181	442181	Origin
TcChr17-S	449153	451153	Origin
TcChr17-S	450031	452031	Origin
TcChr17-S	453182	455182	Origin
TcChr17-S	452792	454792	Origin
TcChr17-S	454469	456469	Origin
TcChr17-S	464525	466525	Origin
TcChr17-S	469830	471830	Origin
TcChr17-S	468578	470578	Origin
TcChr17-S	469589	471589	Origin
TcChr17-S	472949	474949	Origin
TcChr17-S	474238	476238	Origin
TcChr17-S	493530	495530	Origin
TcChr17-S	496181	498181	Origin
TcChr17-S	496149	498149	Origin
TcChr17-S	496965	498965	Origin
TcChr17-S	506343	508343	Origin
TcChr17-S	508827	510827	Origin
TcChr17-S	522520	524520	Origin
TcChr17-S	523772	525772	Origin
TcChr17-S	538403	540403	Origin
TcChr17-S	540051	542051	Origin
TcChr17-S	538993	540993	Origin
TcChr17-S	540170	542170	Origin
TcChr17-S	541706	543706	Origin
TcChr17-S	540867	542867	Origin
TcChr17-S	546984	548984	Origin
TcChr17-S	558048	560048	Origin
TcChr17-S	559573	561573	Origin
TcChr17-S	559749	561749	Origin
TcChr17-S	566014	568014	Origin
TcChr17-S	574359	576359	Origin
TcChr17-S	577523	579523	Origin
TcChr17-S	583183	585183	Origin
TcChr17-S	585328	587328	Origin
TcChr17-S	591400	593400	Origin
TcChr17-S	594740	596740	Origin
TcChr17-S	600643	602643	Origin
TcChr17-S	612581	614581	Origin
TcChr17-S	622811	624811	Origin
TcChr17-S	624566	626566	Origin
TcChr17-S	626342	628342	Origin
TcChr17-S	631307	633307	Origin
TcChr17-S	632502	634502	Origin
TcChr17-S	632260	634260	Origin
TcChr18-S	5126	7126	Origin
TcChr18-S	19568	21568	Origin
TcChr18-S	20014	22014	Origin
TcChr18-S	22620	24620	Origin
TcChr18-S	37194	39194	Origin
TcChr18-S	42000	44000	Origin
TcChr18-S	42059	44059	Origin
TcChr18-S	60488	62488	Origin
TcChr18-S	74112	76112	Origin
TcChr18-S	75649	77649	Origin
TcChr18-S	77876	79876	Origin
TcChr18-S	85093	87093	Origin
TcChr18-S	95235	97235	Origin
TcChr18-S	95314	97314	Origin
TcChr18-S	108509	110509	Origin
TcChr18-S	110759	112759	Origin
TcChr18-S	114968	116968	Origin
TcChr18-S	116989	118989	Origin
TcChr18-S	117051	119051	Origin
TcChr18-S	123728	125728	Origin
TcChr18-S	119116	121116	Origin
TcChr18-S	122016	124016	Origin
TcChr18-S	124371	126371	Origin
TcChr18-S	141222	143222	Origin
TcChr18-S	139497	141497	Origin
TcChr18-S	139280	141280	Origin
TcChr18-S	139274	141274	Origin
TcChr18-S	140197	142197	Origin
TcChr18-S	142542	144542	Origin
TcChr18-S	148624	150624	Origin
TcChr18-S	151927	153927	Origin
TcChr18-S	158206	160206	Origin
TcChr18-S	158719	160719	Origin
TcChr18-S	159621	161621	Origin
TcChr18-S	160383	162383	Origin
TcChr18-S	161414	163414	Origin
TcChr18-S	167112	169112	Origin
TcChr18-S	168998	170998	Origin
TcChr18-S	172911	174911	Origin
TcChr18-S	179723	181723	Origin
TcChr18-S	183870	185870	Origin
TcChr18-S	187136	189136	Origin
TcChr18-S	192807	194807	Origin
TcChr18-S	193653	195653	Origin
TcChr18-S	195627	197627	Origin
TcChr18-S	218787	220787	Origin
TcChr18-S	215441	217441	Origin
TcChr18-S	235214	237214	Origin
TcChr18-S	240004	242004	Origin
TcChr18-S	241085	243085	Origin
TcChr18-S	241374	243374	Origin
TcChr18-S	243534	245534	Origin
TcChr18-S	245193	247193	Origin
TcChr18-S	245396	247396	Origin
TcChr18-S	280567	282567	Origin
TcChr18-S	283227	285227	Origin
TcChr18-S	298461	300461	Origin
TcChr18-S	303360	305360	Origin
TcChr18-S	301432	303432	Origin
TcChr18-S	301758	303758	Origin
TcChr18-S	304138	306138	Origin
TcChr18-S	310397	312397	Origin
TcChr18-S	310536	312536	Origin
TcChr18-S	321437	323437	Origin
TcChr18-S	333095	335095	Origin
TcChr18-S	333794	335794	Origin
TcChr18-S	363982	365982	Origin
TcChr18-S	375156	377156	Origin
TcChr18-S	379135	381135	Origin
TcChr18-S	380439	382439	Origin
TcChr18-S	380453	382453	Origin
TcChr18-S	398807	400807	Origin
TcChr18-S	400190	402190	Origin
TcChr18-S	462703	464703	Origin
TcChr18-S	486769	488769	Origin
TcChr18-S	518308	520308	Origin
TcChr18-S	525139	527139	Origin
TcChr18-S	560310	562310	Origin
TcChr18-S	569469	571469	Origin
TcChr18-S	585496	587496	Origin
TcChr18-S	588681	590681	Origin
TcChr18-S	593707	595707	Origin
TcChr18-S	596912	598912	Origin
TcChr18-S	610560	612560	Origin
TcChr18-S	612247	614247	Origin
TcChr18-S	623908	625908	Origin
TcChr18-S	624893	626893	Origin
TcChr18-S	628590	630590	Origin
TcChr18-S	640515	642515	Origin
TcChr19-S	22431	24431	Origin
TcChr19-S	30840	32840	Origin
TcChr19-S	34269	36269	Origin
TcChr19-S	49001	51001	Origin
TcChr19-S	48756	50756	Origin
TcChr19-S	52411	54411	Origin
TcChr19-S	55879	57879	Origin
TcChr19-S	64884	66884	Origin
TcChr19-S	66876	68876	Origin
TcChr19-S	75732	77732	Origin
TcChr19-S	82909	84909	Origin
TcChr19-S	91865	93865	Origin
TcChr19-S	94612	96612	Origin
TcChr19-S	101812	103812	Origin
TcChr19-S	104332	106332	Origin
TcChr19-S	106742	108742	Origin
TcChr19-S	128339	130339	Origin
TcChr19-S	131631	133631	Origin
TcChr19-S	133366	135366	Origin
TcChr19-S	134513	136513	Origin
TcChr19-S	137437	139437	Origin
TcChr19-S	138023	140023	Origin
TcChr19-S	145144	147144	Origin
TcChr19-S	146792	148792	Origin
TcChr19-S	146965	148965	Origin
TcChr19-S	154192	156192	Origin
TcChr19-S	159203	161203	Origin
TcChr19-S	155444	157444	Origin
TcChr19-S	164451	166451	Origin
TcChr19-S	171864	173864	Origin
TcChr19-S	172363	174363	Origin
TcChr19-S	174074	176074	Origin
TcChr19-S	174923	176923	Origin
TcChr19-S	177460	179460	Origin
TcChr19-S	180154	182154	Origin
TcChr19-S	191958	193958	Origin
TcChr19-S	197667	199667	Origin
TcChr19-S	205279	207279	Origin
TcChr19-S	211414	213414	Origin
TcChr19-S	211740	213740	Origin
TcChr19-S	217059	219059	Origin
TcChr19-S	219095	221095	Origin
TcChr19-S	222454	224454	Origin
TcChr19-S	226897	228897	Origin
TcChr19-S	229192	231192	Origin
TcChr19-S	230829	232829	Origin
TcChr19-S	229633	231633	Origin
TcChr19-S	232908	234908	Origin
TcChr19-S	235994	237994	Origin
TcChr19-S	245869	247869	Origin
TcChr19-S	246741	248741	Origin
TcChr19-S	247912	249912	Origin
TcChr19-S	265885	267885	Origin
TcChr19-S	273061	275061	Origin
TcChr19-S	271579	273579	Origin
TcChr19-S	282514	284514	Origin
TcChr19-S	284363	286363	Origin
TcChr19-S	305153	307153	Origin
TcChr19-S	307881	309881	Origin
TcChr19-S	312216	314216	Origin
TcChr19-S	312882	314882	Origin
TcChr19-S	313512	315512	Origin
TcChr19-S	314618	316618	Origin
TcChr19-S	315322	317322	Origin
TcChr19-S	315773	317773	Origin
TcChr19-S	318289	320289	Origin
TcChr19-S	318001	320001	Origin
TcChr19-S	323060	325060	Origin
TcChr19-S	322561	324561	Origin
TcChr19-S	322372	324372	Origin
TcChr19-S	324156	326156	Origin
TcChr19-S	323271	325271	Origin
TcChr19-S	323799	325799	Origin
TcChr19-S	325983	327983	Origin
TcChr19-S	324844	326844	Origin
TcChr19-S	325336	327336	Origin
TcChr19-S	326106	328106	Origin
TcChr19-S	326525	328525	Origin
TcChr19-S	329343	331343	Origin
TcChr19-S	332161	334161	Origin
TcChr19-S	333298	335298	Origin
TcChr19-S	333077	335077	Origin
TcChr19-S	338622	340622	Origin
TcChr19-S	342262	344262	Origin
TcChr19-S	342857	344857	Origin
TcChr19-S	345185	347185	Origin
TcChr19-S	345866	347866	Origin
TcChr19-S	349130	351130	Origin
TcChr19-S	357904	359904	Origin
TcChr19-S	359493	361493	Origin
TcChr19-S	362997	364997	Origin
TcChr19-S	364180	366180	Origin
TcChr19-S	372724	374724	Origin
TcChr19-S	371014	373014	Origin
TcChr19-S	388122	390122	Origin
TcChr19-S	391451	393451	Origin
TcChr19-S	406312	408312	Origin
TcChr19-S	414008	416008	Origin
TcChr19-S	414097	416097	Origin
TcChr19-S	416896	418896	Origin
TcChr19-S	426363	428363	Origin
TcChr19-S	429084	431084	Origin
TcChr19-S	426922	428922	Origin
TcChr19-S	428699	430699	Origin
TcChr19-S	431802	433802	Origin
TcChr19-S	432108	434108	Origin
TcChr19-S	432664	434664	Origin
TcChr19-S	432009	434009	Origin
TcChr19-S	439376	441376	Origin
TcChr19-S	441191	443191	Origin
TcChr19-S	442650	444650	Origin
TcChr19-S	445516	447516	Origin
TcChr19-S	489428	491428	Origin
TcChr19-S	497843	499843	Origin
TcChr19-S	500808	502808	Origin
TcChr19-S	503620	505620	Origin
TcChr19-S	504753	506753	Origin
TcChr19-S	509883	511883	Origin
TcChr19-S	511099	513099	Origin
TcChr19-S	523266	525266	Origin
TcChr19-S	526390	528390	Origin
TcChr19-S	542961	544961	Origin
TcChr19-S	559104	561104	Origin
TcChr19-S	559578	561578	Origin
TcChr19-S	594352	596352	Origin
TcChr19-S	630453	632453	Origin
TcChr19-S	639856	641856	Origin
TcChr19-S	648476	650476	Origin
TcChr19-S	656256	658256	Origin
TcChr19-S	661643	663643	Origin
TcChr19-S	667877	669877	Origin
TcChr1-S	2980	4980	Origin
TcChr1-S	3658	5658	Origin
TcChr1-S	5050	7050	Origin
TcChr1-S	25079	27079	Origin
TcChr1-S	25651	27651	Origin
TcChr1-S	36546	38546	Origin
TcChr1-S	36568	38568	Origin
TcChr1-S	52598	54598	Origin
TcChr1-S	54609	56609	Origin
TcChr1-S	54351	56351	Origin
TcChr1-S	55318	57318	Origin
TcChr20-S	13337	15337	Origin
TcChr20-S	15985	17985	Origin
TcChr20-S	19583	21583	Origin
TcChr20-S	36927	38927	Origin
TcChr20-S	36676	38676	Origin
TcChr20-S	43911	45911	Origin
TcChr20-S	50061	52061	Origin
TcChr20-S	55774	57774	Origin
TcChr20-S	74965	76965	Origin
TcChr20-S	78087	80087	Origin
TcChr20-S	85242	87242	Origin
TcChr20-S	103437	105437	Origin
TcChr20-S	106553	108553	Origin
TcChr20-S	110686	112686	Origin
TcChr20-S	118728	120728	Origin
TcChr20-S	120334	122334	Origin
TcChr20-S	128742	130742	Origin
TcChr20-S	131040	133040	Origin
TcChr20-S	137741	139741	Origin
TcChr20-S	149741	151741	Origin
TcChr20-S	150173	152173	Origin
TcChr20-S	154157	156157	Origin
TcChr20-S	161522	163522	Origin
TcChr20-S	167009	169009	Origin
TcChr20-S	169837	171837	Origin
TcChr20-S	181541	183541	Origin
TcChr20-S	237470	239470	Origin
TcChr20-S	242520	244520	Origin
TcChr20-S	242850	244850	Origin
TcChr20-S	249355	251355	Origin
TcChr20-S	265071	267071	Origin
TcChr20-S	268994	270994	Origin
TcChr20-S	269593	271593	Origin
TcChr20-S	274406	276406	Origin
TcChr20-S	278188	280188	Origin
TcChr20-S	278822	280822	Origin
TcChr20-S	279522	281522	Origin
TcChr20-S	280872	282872	Origin
TcChr20-S	287936	289936	Origin
TcChr20-S	312686	314686	Origin
TcChr20-S	319665	321665	Origin
TcChr20-S	320536	322536	Origin
TcChr20-S	321164	323164	Origin
TcChr20-S	322713	324713	Origin
TcChr20-S	323148	325148	Origin
TcChr20-S	339780	341780	Origin
TcChr20-S	341331	343331	Origin
TcChr20-S	341592	343592	Origin
TcChr20-S	343277	345277	Origin
TcChr20-S	348893	350893	Origin
TcChr20-S	348134	350134	Origin
TcChr20-S	348092	350092	Origin
TcChr20-S	359278	361278	Origin
TcChr20-S	359436	361436	Origin
TcChr20-S	365442	367442	Origin
TcChr20-S	366315	368315	Origin
TcChr20-S	368587	370587	Origin
TcChr20-S	368685	370685	Origin
TcChr20-S	372845	374845	Origin
TcChr20-S	394314	396314	Origin
TcChr20-S	412474	414474	Origin
TcChr20-S	412982	414982	Origin
TcChr20-S	413311	415311	Origin
TcChr20-S	416697	418697	Origin
TcChr20-S	419237	421237	Origin
TcChr20-S	420522	422522	Origin
TcChr20-S	424025	426025	Origin
TcChr20-S	424444	426444	Origin
TcChr20-S	428607	430607	Origin
TcChr20-S	429603	431603	Origin
TcChr20-S	430424	432424	Origin
TcChr20-S	437236	439236	Origin
TcChr20-S	440594	442594	Origin
TcChr20-S	448415	450415	Origin
TcChr20-S	452638	454638	Origin
TcChr20-S	462139	464139	Origin
TcChr20-S	477070	479070	Origin
TcChr20-S	540965	542965	Origin
TcChr20-S	542970	544970	Origin
TcChr20-S	544136	546136	Origin
TcChr20-S	572840	574840	Origin
TcChr20-S	574982	576982	Origin
TcChr20-S	580112	582112	Origin
TcChr20-S	614769	616769	Origin
TcChr20-S	619145	621145	Origin
TcChr20-S	623033	625033	Origin
TcChr20-S	624667	626667	Origin
TcChr20-S	645945	647945	Origin
TcChr21-S	19944	21944	Origin
TcChr21-S	20154	22154	Origin
TcChr21-S	19318	21318	Origin
TcChr21-S	19649	21649	Origin
TcChr21-S	22823	24823	Origin
TcChr21-S	20848	22848	Origin
TcChr21-S	21860	23860	Origin
TcChr21-S	21285	23285	Origin
TcChr21-S	21816	23816	Origin
TcChr21-S	23492	25492	Origin
TcChr21-S	25711	27711	Origin
TcChr21-S	33217	35217	Origin
TcChr21-S	34378	36378	Origin
TcChr21-S	42414	44414	Origin
TcChr21-S	50257	52257	Origin
TcChr21-S	50243	52243	Origin
TcChr21-S	50019	52019	Origin
TcChr21-S	53724	55724	Origin
TcChr21-S	53340	55340	Origin
TcChr21-S	105261	107261	Origin
TcChr21-S	109602	111602	Origin
TcChr21-S	124487	126487	Origin
TcChr21-S	131108	133108	Origin
TcChr21-S	133817	135817	Origin
TcChr21-S	133391	135391	Origin
TcChr21-S	139106	141106	Origin
TcChr21-S	142300	144300	Origin
TcChr21-S	150989	152989	Origin
TcChr21-S	151522	153522	Origin
TcChr21-S	153734	155734	Origin
TcChr21-S	151801	153801	Origin
TcChr21-S	158780	160780	Origin
TcChr21-S	162490	164490	Origin
TcChr21-S	170463	172463	Origin
TcChr21-S	169510	171510	Origin
TcChr21-S	171074	173074	Origin
TcChr21-S	172747	174747	Origin
TcChr21-S	178657	180657	Origin
TcChr21-S	181752	183752	Origin
TcChr21-S	190481	192481	Origin
TcChr21-S	272083	274083	Origin
TcChr21-S	273961	275961	Origin
TcChr21-S	282498	284498	Origin
TcChr21-S	298222	300222	Origin
TcChr21-S	299750	301750	Origin
TcChr21-S	311890	313890	Origin
TcChr21-S	310375	312375	Origin
TcChr21-S	317665	319665	Origin
TcChr21-S	352295	354295	Origin
TcChr21-S	360691	362691	Origin
TcChr21-S	369832	371832	Origin
TcChr21-S	376205	378205	Origin
TcChr21-S	378805	380805	Origin
TcChr21-S	382286	384286	Origin
TcChr21-S	387324	389324	Origin
TcChr21-S	383532	385532	Origin
TcChr21-S	384974	386974	Origin
TcChr21-S	394009	396009	Origin
TcChr21-S	403380	405380	Origin
TcChr21-S	405311	407311	Origin
TcChr21-S	405489	407489	Origin
TcChr21-S	407752	409752	Origin
TcChr21-S	409931	411931	Origin
TcChr21-S	415447	417447	Origin
TcChr21-S	419964	421964	Origin
TcChr21-S	421285	423285	Origin
TcChr21-S	431767	433767	Origin
TcChr21-S	447119	449119	Origin
TcChr21-S	451704	453704	Origin
TcChr21-S	460471	462471	Origin
TcChr21-S	460905	462905	Origin
TcChr21-S	468146	470146	Origin
TcChr21-S	475876	477876	Origin
TcChr21-S	485295	487295	Origin
TcChr21-S	489051	491051	Origin
TcChr21-S	487896	489896	Origin
TcChr21-S	500953	502953	Origin
TcChr21-S	540409	542409	Origin
TcChr21-S	617111	619111	Origin
TcChr21-S	625998	627998	Origin
TcChr21-S	626580	628580	Origin
TcChr21-S	631763	633763	Origin
TcChr21-S	633700	635700	Origin
TcChr21-S	646766	648766	Origin
TcChr21-S	647764	649764	Origin
TcChr21-S	650449	652449	Origin
TcChr22-S	1367	3367	Origin
TcChr22-S	6563	8563	Origin
TcChr22-S	19075	21075	Origin
TcChr22-S	19709	21709	Origin
TcChr22-S	20248	22248	Origin
TcChr22-S	20568	22568	Origin
TcChr22-S	21163	23163	Origin
TcChr22-S	20884	22884	Origin
TcChr22-S	21506	23506	Origin
TcChr22-S	21514	23514	Origin
TcChr22-S	23839	25839	Origin
TcChr22-S	24790	26790	Origin
TcChr22-S	24528	26528	Origin
TcChr22-S	24037	26037	Origin
TcChr22-S	24375	26375	Origin
TcChr22-S	26504	28504	Origin
TcChr22-S	176330	178330	Origin
TcChr22-S	177522	179522	Origin
TcChr22-S	177533	179533	Origin
TcChr22-S	178297	180297	Origin
TcChr22-S	179996	181996	Origin
TcChr22-S	180297	182297	Origin
TcChr22-S	181892	183892	Origin
TcChr22-S	180316	182316	Origin
TcChr22-S	185572	187572	Origin
TcChr22-S	179290	181290	Origin
TcChr22-S	179714	181714	Origin
TcChr22-S	181831	183831	Origin
TcChr22-S	181063	183063	Origin
TcChr22-S	181048	183048	Origin
TcChr22-S	186614	188614	Origin
TcChr22-S	181990	183990	Origin
TcChr22-S	186664	188664	Origin
TcChr22-S	182658	184658	Origin
TcChr22-S	180989	182989	Origin
TcChr22-S	183085	185085	Origin
TcChr22-S	183675	185675	Origin
TcChr22-S	184168	186168	Origin
TcChr22-S	184330	186330	Origin
TcChr22-S	193318	195318	Origin
TcChr22-S	192328	194328	Origin
TcChr22-S	197113	199113	Origin
TcChr22-S	208318	210318	Origin
TcChr22-S	211133	213133	Origin
TcChr22-S	215959	217959	Origin
TcChr22-S	246782	248782	Origin
TcChr22-S	246928	248928	Origin
TcChr22-S	248004	250004	Origin
TcChr22-S	248507	250507	Origin
TcChr22-S	255632	257632	Origin
TcChr22-S	280638	282638	Origin
TcChr22-S	280788	282788	Origin
TcChr22-S	282401	284401	Origin
TcChr22-S	286328	288328	Origin
TcChr22-S	288726	290726	Origin
TcChr22-S	291231	293231	Origin
TcChr22-S	299035	301035	Origin
TcChr22-S	298137	300137	Origin
TcChr22-S	307441	309441	Origin
TcChr22-S	311778	313778	Origin
TcChr22-S	317329	319329	Origin
TcChr22-S	319026	321026	Origin
TcChr22-S	328289	330289	Origin
TcChr22-S	334111	336111	Origin
TcChr22-S	344120	346120	Origin
TcChr22-S	382860	384860	Origin
TcChr22-S	384563	386563	Origin
TcChr22-S	385411	387411	Origin
TcChr22-S	386895	388895	Origin
TcChr22-S	388396	390396	Origin
TcChr22-S	399401	401401	Origin
TcChr22-S	403785	405785	Origin
TcChr22-S	405248	407248	Origin
TcChr22-S	421257	423257	Origin
TcChr22-S	420991	422991	Origin
TcChr22-S	422223	424223	Origin
TcChr22-S	425417	427417	Origin
TcChr22-S	431923	433923	Origin
TcChr22-S	436334	438334	Origin
TcChr22-S	448878	450878	Origin
TcChr22-S	449508	451508	Origin
TcChr22-S	450251	452251	Origin
TcChr22-S	465762	467762	Origin
TcChr22-S	466538	468538	Origin
TcChr22-S	470736	472736	Origin
TcChr22-S	473208	475208	Origin
TcChr22-S	472860	474860	Origin
TcChr22-S	475405	477405	Origin
TcChr22-S	481772	483772	Origin
TcChr22-S	496240	498240	Origin
TcChr22-S	497828	499828	Origin
TcChr22-S	503800	505800	Origin
TcChr22-S	506619	508619	Origin
TcChr22-S	506865	508865	Origin
TcChr22-S	507898	509898	Origin
TcChr22-S	515814	517814	Origin
TcChr22-S	525546	527546	Origin
TcChr22-S	526599	528599	Origin
TcChr22-S	532770	534770	Origin
TcChr22-S	534774	536774	Origin
TcChr22-S	543409	545409	Origin
TcChr22-S	545527	547527	Origin
TcChr22-S	551079	553079	Origin
TcChr22-S	552262	554262	Origin
TcChr22-S	554094	556094	Origin
TcChr22-S	552741	554741	Origin
TcChr22-S	561415	563415	Origin
TcChr22-S	562960	564960	Origin
TcChr22-S	582237	584237	Origin
TcChr22-S	584853	586853	Origin
TcChr22-S	587621	589621	Origin
TcChr22-S	588739	590739	Origin
TcChr22-S	592806	594806	Origin
TcChr22-S	602897	604897	Origin
TcChr22-S	603129	605129	Origin
TcChr22-S	605835	607835	Origin
TcChr22-S	606336	608336	Origin
TcChr22-S	610872	612872	Origin
TcChr22-S	622488	624488	Origin
TcChr22-S	646684	648684	Origin
TcChr22-S	675669	677669	Origin
TcChr22-S	678010	680010	Origin
TcChr22-S	676904	678904	Origin
TcChr23-S	26683	28683	Origin
TcChr23-S	23938	25938	Origin
TcChr23-S	28561	30561	Origin
TcChr23-S	36653	38653	Origin
TcChr23-S	38052	40052	Origin
TcChr23-S	42787	44787	Origin
TcChr23-S	46359	48359	Origin
TcChr23-S	68158	70158	Origin
TcChr23-S	70244	72244	Origin
TcChr23-S	71358	73358	Origin
TcChr23-S	71988	73988	Origin
TcChr23-S	76166	78166	Origin
TcChr23-S	76083	78083	Origin
TcChr23-S	78656	80656	Origin
TcChr23-S	91874	93874	Origin
TcChr23-S	93182	95182	Origin
TcChr23-S	107785	109785	Origin
TcChr23-S	110345	112345	Origin
TcChr23-S	112251	114251	Origin
TcChr23-S	115813	117813	Origin
TcChr23-S	117774	119774	Origin
TcChr23-S	119642	121642	Origin
TcChr23-S	120861	122861	Origin
TcChr23-S	123128	125128	Origin
TcChr23-S	124533	126533	Origin
TcChr23-S	125961	127961	Origin
TcChr23-S	126997	128997	Origin
TcChr23-S	129690	131690	Origin
TcChr23-S	132766	134766	Origin
TcChr23-S	135625	137625	Origin
TcChr23-S	138542	140542	Origin
TcChr23-S	138923	140923	Origin
TcChr23-S	141344	143344	Origin
TcChr23-S	154430	156430	Origin
TcChr23-S	165460	167460	Origin
TcChr23-S	165352	167352	Origin
TcChr23-S	169021	171021	Origin
TcChr23-S	171438	173438	Origin
TcChr23-S	175685	177685	Origin
TcChr23-S	221494	223494	Origin
TcChr23-S	221894	223894	Origin
TcChr23-S	228464	230464	Origin
TcChr23-S	233980	235980	Origin
TcChr23-S	237080	239080	Origin
TcChr23-S	242506	244506	Origin
TcChr23-S	243057	245057	Origin
TcChr23-S	244715	246715	Origin
TcChr23-S	266331	268331	Origin
TcChr23-S	269766	271766	Origin
TcChr23-S	273091	275091	Origin
TcChr23-S	276261	278261	Origin
TcChr23-S	275623	277623	Origin
TcChr23-S	282859	284859	Origin
TcChr23-S	285244	287244	Origin
TcChr23-S	285512	287512	Origin
TcChr23-S	293276	295276	Origin
TcChr23-S	292158	294158	Origin
TcChr23-S	294780	296780	Origin
TcChr23-S	302660	304660	Origin
TcChr23-S	303511	305511	Origin
TcChr23-S	306294	308294	Origin
TcChr23-S	312989	314989	Origin
TcChr23-S	361924	363924	Origin
TcChr23-S	363379	365379	Origin
TcChr23-S	365197	367197	Origin
TcChr23-S	370964	372964	Origin
TcChr23-S	371528	373528	Origin
TcChr23-S	373211	375211	Origin
TcChr23-S	371367	373367	Origin
TcChr23-S	379536	381536	Origin
TcChr23-S	402629	404629	Origin
TcChr23-S	406483	408483	Origin
TcChr23-S	409839	411839	Origin
TcChr23-S	412039	414039	Origin
TcChr23-S	413926	415926	Origin
TcChr23-S	413115	415115	Origin
TcChr23-S	413698	415698	Origin
TcChr23-S	418517	420517	Origin
TcChr23-S	419013	421013	Origin
TcChr23-S	420996	422996	Origin
TcChr23-S	427336	429336	Origin
TcChr23-S	428831	430831	Origin
TcChr23-S	431314	433314	Origin
TcChr23-S	433192	435192	Origin
TcChr23-S	438099	440099	Origin
TcChr23-S	445255	447255	Origin
TcChr23-S	450700	452700	Origin
TcChr23-S	455336	457336	Origin
TcChr23-S	459013	461013	Origin
TcChr23-S	459484	461484	Origin
TcChr23-S	461228	463228	Origin
TcChr23-S	463331	465331	Origin
TcChr23-S	463337	465337	Origin
TcChr23-S	466978	468978	Origin
TcChr23-S	482152	484152	Origin
TcChr23-S	492265	494265	Origin
TcChr23-S	491118	493118	Origin
TcChr23-S	496855	498855	Origin
TcChr23-S	497085	499085	Origin
TcChr23-S	513283	515283	Origin
TcChr23-S	528084	530084	Origin
TcChr23-S	529784	531784	Origin
TcChr23-S	534749	536749	Origin
TcChr23-S	537427	539427	Origin
TcChr23-S	588225	590225	Origin
TcChr23-S	587059	589059	Origin
TcChr23-S	586697	588697	Origin
TcChr23-S	587333	589333	Origin
TcChr23-S	593152	595152	Origin
TcChr23-S	594135	596135	Origin
TcChr23-S	604440	606440	Origin
TcChr23-S	615975	617975	Origin
TcChr24-S	47794	49794	Origin
TcChr24-S	57807	59807	Origin
TcChr24-S	61766	63766	Origin
TcChr24-S	64070	66070	Origin
TcChr24-S	71130	73130	Origin
TcChr24-S	158597	160597	Origin
TcChr24-S	159645	161645	Origin
TcChr24-S	163624	165624	Origin
TcChr24-S	186982	188982	Origin
TcChr24-S	196748	198748	Origin
TcChr24-S	201169	203169	Origin
TcChr24-S	209976	211976	Origin
TcChr24-S	211172	213172	Origin
TcChr24-S	217674	219674	Origin
TcChr24-S	216935	218935	Origin
TcChr24-S	217834	219834	Origin
TcChr24-S	218753	220753	Origin
TcChr24-S	218915	220915	Origin
TcChr24-S	219149	221149	Origin
TcChr24-S	220483	222483	Origin
TcChr24-S	220779	222779	Origin
TcChr24-S	222954	224954	Origin
TcChr24-S	224658	226658	Origin
TcChr24-S	234156	236156	Origin
TcChr24-S	237580	239580	Origin
TcChr24-S	241041	243041	Origin
TcChr24-S	256184	258184	Origin
TcChr24-S	259302	261302	Origin
TcChr24-S	257517	259517	Origin
TcChr24-S	260491	262491	Origin
TcChr24-S	264508	266508	Origin
TcChr24-S	266926	268926	Origin
TcChr24-S	265801	267801	Origin
TcChr24-S	268088	270088	Origin
TcChr24-S	268771	270771	Origin
TcChr24-S	269617	271617	Origin
TcChr24-S	270712	272712	Origin
TcChr24-S	279994	281994	Origin
TcChr24-S	287810	289810	Origin
TcChr24-S	288800	290800	Origin
TcChr24-S	296903	298903	Origin
TcChr24-S	299209	301209	Origin
TcChr24-S	307555	309555	Origin
TcChr24-S	314793	316793	Origin
TcChr24-S	316974	318974	Origin
TcChr24-S	335266	337266	Origin
TcChr24-S	337511	339511	Origin
TcChr24-S	338710	340710	Origin
TcChr24-S	357807	359807	Origin
TcChr24-S	363748	365748	Origin
TcChr24-S	378952	380952	Origin
TcChr24-S	379245	381245	Origin
TcChr24-S	387433	389433	Origin
TcChr24-S	397553	399553	Origin
TcChr24-S	405414	407414	Origin
TcChr24-S	404170	406170	Origin
TcChr24-S	411167	413167	Origin
TcChr24-S	424696	426696	Origin
TcChr24-S	428555	430555	Origin
TcChr24-S	624378	626378	Origin
TcChr24-S	634046	636046	Origin
TcChr24-S	635809	637809	Origin
TcChr24-S	634461	636461	Origin
TcChr24-S	637254	639254	Origin
TcChr24-S	635092	637092	Origin
TcChr24-S	634470	636470	Origin
TcChr24-S	634734	636734	Origin
TcChr24-S	634708	636708	Origin
TcChr24-S	635781	637781	Origin
TcChr24-S	635812	637812	Origin
TcChr24-S	638682	640682	Origin
TcChr24-S	636747	638747	Origin
TcChr24-S	637293	639293	Origin
TcChr24-S	638824	640824	Origin
TcChr24-S	640382	642382	Origin
TcChr24-S	654118	656118	Origin
TcChr24-S	656375	658375	Origin
TcChr24-S	665864	667864	Origin
TcChr24-S	673813	675813	Origin
TcChr24-S	676895	678895	Origin
TcChr24-S	677634	679634	Origin
TcChr24-S	681759	683759	Origin
TcChr24-S	681442	683442	Origin
TcChr24-S	684007	686007	Origin
TcChr24-S	689576	691576	Origin
TcChr24-S	699721	701721	Origin
TcChr24-S	706804	708804	Origin
TcChr24-S	708323	710323	Origin
TcChr24-S	708620	710620	Origin
TcChr24-S	710444	712444	Origin
TcChr24-S	712365	714365	Origin
TcChr24-S	718247	720247	Origin
TcChr24-S	722155	724155	Origin
TcChr24-S	722134	724134	Origin
TcChr24-S	723654	725654	Origin
TcChr24-S	736668	738668	Origin
TcChr24-S	735092	737092	Origin
TcChr24-S	736089	738089	Origin
TcChr24-S	736850	738850	Origin
TcChr24-S	738718	740718	Origin
TcChr24-S	756639	758639	Origin
TcChr24-S	761203	763203	Origin
TcChr24-S	764063	766063	Origin
TcChr24-S	771405	773405	Origin
TcChr25-S	11262	13262	Origin
TcChr25-S	11814	13814	Origin
TcChr25-S	23386	25386	Origin
TcChr25-S	79735	81735	Origin
TcChr25-S	87369	89369	Origin
TcChr25-S	90886	92886	Origin
TcChr25-S	109213	111213	Origin
TcChr25-S	108551	110551	Origin
TcChr25-S	120338	122338	Origin
TcChr25-S	123863	125863	Origin
TcChr25-S	126025	128025	Origin
TcChr25-S	129905	131905	Origin
TcChr25-S	131121	133121	Origin
TcChr25-S	133984	135984	Origin
TcChr25-S	136515	138515	Origin
TcChr25-S	160300	162300	Origin
TcChr25-S	165418	167418	Origin
TcChr25-S	166138	168138	Origin
TcChr25-S	175586	177586	Origin
TcChr25-S	176285	178285	Origin
TcChr25-S	182608	184608	Origin
TcChr25-S	180896	182896	Origin
TcChr25-S	183239	185239	Origin
TcChr25-S	191589	193589	Origin
TcChr25-S	191673	193673	Origin
TcChr25-S	192506	194506	Origin
TcChr25-S	194771	196771	Origin
TcChr25-S	204690	206690	Origin
TcChr25-S	208791	210791	Origin
TcChr25-S	219262	221262	Origin
TcChr25-S	219421	221421	Origin
TcChr25-S	222536	224536	Origin
TcChr25-S	227926	229926	Origin
TcChr25-S	228697	230697	Origin
TcChr25-S	234166	236166	Origin
TcChr25-S	237858	239858	Origin
TcChr25-S	242737	244737	Origin
TcChr25-S	245987	247987	Origin
TcChr25-S	260079	262079	Origin
TcChr25-S	265244	267244	Origin
TcChr25-S	270120	272120	Origin
TcChr25-S	278679	280679	Origin
TcChr25-S	289021	291021	Origin
TcChr25-S	288673	290673	Origin
TcChr25-S	291042	293042	Origin
TcChr25-S	295022	297022	Origin
TcChr25-S	314071	316071	Origin
TcChr25-S	312477	314477	Origin
TcChr25-S	320452	322452	Origin
TcChr25-S	322471	324471	Origin
TcChr25-S	322943	324943	Origin
TcChr25-S	324298	326298	Origin
TcChr25-S	333194	335194	Origin
TcChr25-S	332122	334122	Origin
TcChr25-S	338630	340630	Origin
TcChr25-S	335698	337698	Origin
TcChr25-S	338227	340227	Origin
TcChr25-S	338165	340165	Origin
TcChr25-S	342432	344432	Origin
TcChr25-S	344760	346760	Origin
TcChr25-S	346255	348255	Origin
TcChr25-S	349377	351377	Origin
TcChr25-S	351272	353272	Origin
TcChr25-S	351569	353569	Origin
TcChr25-S	380210	382210	Origin
TcChr25-S	380264	382264	Origin
TcChr25-S	384968	386968	Origin
TcChr25-S	385992	387992	Origin
TcChr25-S	386749	388749	Origin
TcChr25-S	387459	389459	Origin
TcChr25-S	389171	391171	Origin
TcChr25-S	392089	394089	Origin
TcChr25-S	396715	398715	Origin
TcChr25-S	399721	401721	Origin
TcChr25-S	401354	403354	Origin
TcChr25-S	399346	401346	Origin
TcChr25-S	404300	406300	Origin
TcChr25-S	406178	408178	Origin
TcChr25-S	405946	407946	Origin
TcChr25-S	421675	423675	Origin
TcChr25-S	423228	425228	Origin
TcChr25-S	440365	442365	Origin
TcChr25-S	440382	442382	Origin
TcChr25-S	441438	443438	Origin
TcChr25-S	445081	447081	Origin
TcChr25-S	457345	459345	Origin
TcChr25-S	464104	466104	Origin
TcChr25-S	624319	626319	Origin
TcChr25-S	629726	631726	Origin
TcChr25-S	633729	635729	Origin
TcChr25-S	635747	637747	Origin
TcChr25-S	638676	640676	Origin
TcChr25-S	646584	648584	Origin
TcChr25-S	650748	652748	Origin
TcChr25-S	649611	651611	Origin
TcChr25-S	651534	653534	Origin
TcChr25-S	679431	681431	Origin
TcChr26-S	3135	5135	Origin
TcChr26-S	4523	6523	Origin
TcChr26-S	5124	7124	Origin
TcChr26-S	14645	16645	Origin
TcChr26-S	15212	17212	Origin
TcChr26-S	16849	18849	Origin
TcChr26-S	18292	20292	Origin
TcChr26-S	28479	30479	Origin
TcChr26-S	30056	32056	Origin
TcChr26-S	66454	68454	Origin
TcChr26-S	71196	73196	Origin
TcChr26-S	78082	80082	Origin
TcChr26-S	83674	85674	Origin
TcChr26-S	88514	90514	Origin
TcChr26-S	88452	90452	Origin
TcChr26-S	97259	99259	Origin
TcChr26-S	102771	104771	Origin
TcChr26-S	108185	110185	Origin
TcChr26-S	108871	110871	Origin
TcChr26-S	135422	137422	Origin
TcChr26-S	133550	135550	Origin
TcChr26-S	137040	139040	Origin
TcChr26-S	135538	137538	Origin
TcChr26-S	147383	149383	Origin
TcChr26-S	151649	153649	Origin
TcChr26-S	153558	155558	Origin
TcChr26-S	154975	156975	Origin
TcChr26-S	159509	161509	Origin
TcChr26-S	162758	164758	Origin
TcChr26-S	171446	173446	Origin
TcChr26-S	173258	175258	Origin
TcChr26-S	175060	177060	Origin
TcChr26-S	176283	178283	Origin
TcChr26-S	188971	190971	Origin
TcChr26-S	192310	194310	Origin
TcChr26-S	191533	193533	Origin
TcChr26-S	192061	194061	Origin
TcChr26-S	196213	198213	Origin
TcChr26-S	203637	205637	Origin
TcChr26-S	214471	216471	Origin
TcChr26-S	243296	245296	Origin
TcChr26-S	248349	250349	Origin
TcChr26-S	254326	256326	Origin
TcChr26-S	279548	281548	Origin
TcChr26-S	279890	281890	Origin
TcChr26-S	281576	283576	Origin
TcChr26-S	284361	286361	Origin
TcChr26-S	284782	286782	Origin
TcChr26-S	292282	294282	Origin
TcChr26-S	302305	304305	Origin
TcChr26-S	304459	306459	Origin
TcChr26-S	330299	332299	Origin
TcChr26-S	331710	333710	Origin
TcChr26-S	334723	336723	Origin
TcChr26-S	352600	354600	Origin
TcChr26-S	351689	353689	Origin
TcChr26-S	352904	354904	Origin
TcChr26-S	355069	357069	Origin
TcChr26-S	362254	364254	Origin
TcChr26-S	374564	376564	Origin
TcChr26-S	422080	424080	Origin
TcChr26-S	422592	424592	Origin
TcChr26-S	435640	437640	Origin
TcChr26-S	443329	445329	Origin
TcChr26-S	450839	452839	Origin
TcChr26-S	463074	465074	Origin
TcChr26-S	470782	472782	Origin
TcChr26-S	473601	475601	Origin
TcChr26-S	479448	481448	Origin
TcChr26-S	481469	483469	Origin
TcChr26-S	489194	491194	Origin
TcChr26-S	490135	492135	Origin
TcChr26-S	496846	498846	Origin
TcChr26-S	494480	496480	Origin
TcChr26-S	494636	496636	Origin
TcChr26-S	499907	501907	Origin
TcChr26-S	503115	505115	Origin
TcChr26-S	509349	511349	Origin
TcChr26-S	519620	521620	Origin
TcChr26-S	518889	520889	Origin
TcChr26-S	525871	527871	Origin
TcChr26-S	530095	532095	Origin
TcChr26-S	536659	538659	Origin
TcChr26-S	543964	545964	Origin
TcChr26-S	543526	545526	Origin
TcChr26-S	548029	550029	Origin
TcChr26-S	549346	551346	Origin
TcChr26-S	549585	551585	Origin
TcChr26-S	549347	551347	Origin
TcChr26-S	551520	553520	Origin
TcChr26-S	556370	558370	Origin
TcChr26-S	555724	557724	Origin
TcChr26-S	558715	560715	Origin
TcChr26-S	559011	561011	Origin
TcChr26-S	560502	562502	Origin
TcChr26-S	569756	571756	Origin
TcChr26-S	568966	570966	Origin
TcChr26-S	571447	573447	Origin
TcChr26-S	573600	575600	Origin
TcChr26-S	572914	574914	Origin
TcChr26-S	578038	580038	Origin
TcChr26-S	577205	579205	Origin
TcChr26-S	577855	579855	Origin
TcChr26-S	590923	592923	Origin
TcChr26-S	592819	594819	Origin
TcChr26-S	593351	595351	Origin
TcChr26-S	601022	603022	Origin
TcChr26-S	602748	604748	Origin
TcChr26-S	601777	603777	Origin
TcChr26-S	603881	605881	Origin
TcChr26-S	606594	608594	Origin
TcChr26-S	609358	611358	Origin
TcChr26-S	611689	613689	Origin
TcChr26-S	622879	624879	Origin
TcChr26-S	625303	627303	Origin
TcChr26-S	629628	631628	Origin
TcChr26-S	667712	669712	Origin
TcChr26-S	673321	675321	Origin
TcChr26-S	671631	673631	Origin
TcChr26-S	673425	675425	Origin
TcChr26-S	677330	679330	Origin
TcChr26-S	682926	684926	Origin
TcChr26-S	685434	687434	Origin
TcChr26-S	688087	690087	Origin
TcChr26-S	692408	694408	Origin
TcChr26-S	691179	693179	Origin
TcChr26-S	699253	701253	Origin
TcChr26-S	701160	703160	Origin
TcChr26-S	703408	705408	Origin
TcChr26-S	705498	707498	Origin
TcChr26-S	708234	710234	Origin
TcChr26-S	712790	714790	Origin
TcChr26-S	718197	720197	Origin
TcChr26-S	720067	722067	Origin
TcChr26-S	724899	726899	Origin
TcChr26-S	750899	752899	Origin
TcChr26-S	764234	766234	Origin
TcChr27-S	24223	26223	Origin
TcChr27-S	20572	22572	Origin
TcChr27-S	21464	23464	Origin
TcChr27-S	24185	26185	Origin
TcChr27-S	25375	27375	Origin
TcChr27-S	28275	30275	Origin
TcChr27-S	32204	34204	Origin
TcChr27-S	38385	40385	Origin
TcChr27-S	40351	42351	Origin
TcChr27-S	41429	43429	Origin
TcChr27-S	42831	44831	Origin
TcChr27-S	43837	45837	Origin
TcChr27-S	45454	47454	Origin
TcChr27-S	50155	52155	Origin
TcChr27-S	56877	58877	Origin
TcChr27-S	58485	60485	Origin
TcChr27-S	59608	61608	Origin
TcChr27-S	61996	63996	Origin
TcChr27-S	61894	63894	Origin
TcChr27-S	62896	64896	Origin
TcChr27-S	62980	64980	Origin
TcChr27-S	76268	78268	Origin
TcChr27-S	75695	77695	Origin
TcChr27-S	90589	92589	Origin
TcChr27-S	94014	96014	Origin
TcChr27-S	101916	103916	Origin
TcChr27-S	111119	113119	Origin
TcChr27-S	114743	116743	Origin
TcChr27-S	115494	117494	Origin
TcChr27-S	118615	120615	Origin
TcChr27-S	120897	122897	Origin
TcChr27-S	129711	131711	Origin
TcChr27-S	129607	131607	Origin
TcChr27-S	132415	134415	Origin
TcChr27-S	140468	142468	Origin
TcChr27-S	140638	142638	Origin
TcChr27-S	143141	145141	Origin
TcChr27-S	145742	147742	Origin
TcChr27-S	152844	154844	Origin
TcChr27-S	156226	158226	Origin
TcChr27-S	156803	158803	Origin
TcChr27-S	157824	159824	Origin
TcChr27-S	157674	159674	Origin
TcChr27-S	158139	160139	Origin
TcChr27-S	158433	160433	Origin
TcChr27-S	159551	161551	Origin
TcChr27-S	160294	162294	Origin
TcChr27-S	163552	165552	Origin
TcChr27-S	168570	170570	Origin
TcChr27-S	169725	171725	Origin
TcChr27-S	170846	172846	Origin
TcChr27-S	176104	178104	Origin
TcChr27-S	180661	182661	Origin
TcChr27-S	182264	184264	Origin
TcChr27-S	181535	183535	Origin
TcChr27-S	194196	196196	Origin
TcChr27-S	238685	240685	Origin
TcChr27-S	238553	240553	Origin
TcChr27-S	239647	241647	Origin
TcChr27-S	245989	247989	Origin
TcChr27-S	253708	255708	Origin
TcChr27-S	258183	260183	Origin
TcChr27-S	260502	262502	Origin
TcChr27-S	261857	263857	Origin
TcChr27-S	266568	268568	Origin
TcChr27-S	287736	289736	Origin
TcChr27-S	289280	291280	Origin
TcChr27-S	293166	295166	Origin
TcChr27-S	294610	296610	Origin
TcChr27-S	296838	298838	Origin
TcChr27-S	298186	300186	Origin
TcChr27-S	298604	300604	Origin
TcChr27-S	299065	301065	Origin
TcChr27-S	301983	303983	Origin
TcChr27-S	304646	306646	Origin
TcChr27-S	308791	310791	Origin
TcChr27-S	329609	331609	Origin
TcChr27-S	338052	340052	Origin
TcChr27-S	339207	341207	Origin
TcChr27-S	343091	345091	Origin
TcChr27-S	347427	349427	Origin
TcChr27-S	348971	350971	Origin
TcChr27-S	353470	355470	Origin
TcChr27-S	356348	358348	Origin
TcChr27-S	356409	358409	Origin
TcChr27-S	356042	358042	Origin
TcChr27-S	357652	359652	Origin
TcChr27-S	364452	366452	Origin
TcChr27-S	377885	379885	Origin
TcChr27-S	382255	384255	Origin
TcChr27-S	384053	386053	Origin
TcChr27-S	386484	388484	Origin
TcChr27-S	387436	389436	Origin
TcChr27-S	388660	390660	Origin
TcChr27-S	389063	391063	Origin
TcChr27-S	390832	392832	Origin
TcChr27-S	392992	394992	Origin
TcChr27-S	396836	398836	Origin
TcChr27-S	401135	403135	Origin
TcChr27-S	399834	401834	Origin
TcChr27-S	416300	418300	Origin
TcChr27-S	414875	416875	Origin
TcChr27-S	417773	419773	Origin
TcChr27-S	421961	423961	Origin
TcChr27-S	433157	435157	Origin
TcChr27-S	435057	437057	Origin
TcChr27-S	442767	444767	Origin
TcChr27-S	456513	458513	Origin
TcChr27-S	459222	461222	Origin
TcChr27-S	459417	461417	Origin
TcChr27-S	462921	464921	Origin
TcChr27-S	460261	462261	Origin
TcChr27-S	462747	464747	Origin
TcChr27-S	464682	466682	Origin
TcChr27-S	463888	465888	Origin
TcChr27-S	475425	477425	Origin
TcChr27-S	483035	485035	Origin
TcChr27-S	481934	483934	Origin
TcChr27-S	494755	496755	Origin
TcChr27-S	495780	497780	Origin
TcChr27-S	495988	497988	Origin
TcChr27-S	499273	501273	Origin
TcChr27-S	500243	502243	Origin
TcChr27-S	501772	503772	Origin
TcChr27-S	501809	503809	Origin
TcChr27-S	510948	512948	Origin
TcChr27-S	512733	514733	Origin
TcChr27-S	514351	516351	Origin
TcChr27-S	517298	519298	Origin
TcChr27-S	529408	531408	Origin
TcChr27-S	531267	533267	Origin
TcChr27-S	533442	535442	Origin
TcChr27-S	533686	535686	Origin
TcChr27-S	537483	539483	Origin
TcChr27-S	539306	541306	Origin
TcChr27-S	540308	542308	Origin
TcChr27-S	545571	547571	Origin
TcChr27-S	546439	548439	Origin
TcChr27-S	552380	554380	Origin
TcChr27-S	565203	567203	Origin
TcChr27-S	581121	583121	Origin
TcChr27-S	580702	582702	Origin
TcChr27-S	583469	585469	Origin
TcChr27-S	586478	588478	Origin
TcChr27-S	591358	593358	Origin
TcChr27-S	601042	603042	Origin
TcChr27-S	601496	603496	Origin
TcChr27-S	603541	605541	Origin
TcChr27-S	610557	612557	Origin
TcChr27-S	607448	609448	Origin
TcChr27-S	606472	608472	Origin
TcChr27-S	608143	610143	Origin
TcChr27-S	608287	610287	Origin
TcChr27-S	614432	616432	Origin
TcChr27-S	610831	612831	Origin
TcChr27-S	616136	618136	Origin
TcChr27-S	622720	624720	Origin
TcChr27-S	624657	626657	Origin
TcChr27-S	627244	629244	Origin
TcChr27-S	628996	630996	Origin
TcChr27-S	631199	633199	Origin
TcChr27-S	637891	639891	Origin
TcChr27-S	633929	635929	Origin
TcChr27-S	635539	637539	Origin
TcChr27-S	638632	640632	Origin
TcChr27-S	642315	644315	Origin
TcChr27-S	643972	645972	Origin
TcChr27-S	642740	644740	Origin
TcChr27-S	644145	646145	Origin
TcChr27-S	647545	649545	Origin
TcChr27-S	649602	651602	Origin
TcChr27-S	658915	660915	Origin
TcChr27-S	666089	668089	Origin
TcChr27-S	665448	667448	Origin
TcChr27-S	667738	669738	Origin
TcChr27-S	669518	671518	Origin
TcChr27-S	674686	676686	Origin
TcChr27-S	674429	676429	Origin
TcChr27-S	682211	684211	Origin
TcChr27-S	682921	684921	Origin
TcChr27-S	686442	688442	Origin
TcChr27-S	690441	692441	Origin
TcChr27-S	694410	696410	Origin
TcChr27-S	698029	700029	Origin
TcChr27-S	697621	699621	Origin
TcChr27-S	698507	700507	Origin
TcChr27-S	702628	704628	Origin
TcChr27-S	710637	712637	Origin
TcChr27-S	714068	716068	Origin
TcChr27-S	716146	718146	Origin
TcChr27-S	721855	723855	Origin
TcChr27-S	761204	763204	Origin
TcChr27-S	766082	768082	Origin
TcChr27-S	772426	774426	Origin
TcChr27-S	775393	777393	Origin
TcChr27-S	777954	779954	Origin
TcChr27-S	779388	781388	Origin
TcChr28-S	17416	19416	Origin
TcChr28-S	48100	50100	Origin
TcChr28-S	50128	52128	Origin
TcChr28-S	52100	54100	Origin
TcChr28-S	51695	53695	Origin
TcChr28-S	70741	72741	Origin
TcChr28-S	70700	72700	Origin
TcChr28-S	70444	72444	Origin
TcChr28-S	71808	73808	Origin
TcChr28-S	79445	81445	Origin
TcChr28-S	81847	83847	Origin
TcChr28-S	83377	85377	Origin
TcChr28-S	87496	89496	Origin
TcChr28-S	88492	90492	Origin
TcChr28-S	88466	90466	Origin
TcChr28-S	103093	105093	Origin
TcChr28-S	112611	114611	Origin
TcChr28-S	115159	117159	Origin
TcChr28-S	118905	120905	Origin
TcChr28-S	123666	125666	Origin
TcChr28-S	129405	131405	Origin
TcChr28-S	128398	130398	Origin
TcChr28-S	135688	137688	Origin
TcChr28-S	152789	154789	Origin
TcChr28-S	162031	164031	Origin
TcChr28-S	165041	167041	Origin
TcChr28-S	170182	172182	Origin
TcChr28-S	173882	175882	Origin
TcChr28-S	180433	182433	Origin
TcChr28-S	182048	184048	Origin
TcChr28-S	187461	189461	Origin
TcChr28-S	188360	190360	Origin
TcChr28-S	193610	195610	Origin
TcChr28-S	212581	214581	Origin
TcChr28-S	212605	214605	Origin
TcChr28-S	225983	227983	Origin
TcChr28-S	227911	229911	Origin
TcChr28-S	229824	231824	Origin
TcChr28-S	267672	269672	Origin
TcChr28-S	271162	273162	Origin
TcChr28-S	287102	289102	Origin
TcChr28-S	319419	321419	Origin
TcChr28-S	342525	344525	Origin
TcChr28-S	369907	371907	Origin
TcChr28-S	371543	373543	Origin
TcChr28-S	371085	373085	Origin
TcChr28-S	376238	378238	Origin
TcChr28-S	377286	379286	Origin
TcChr28-S	380100	382100	Origin
TcChr28-S	380981	382981	Origin
TcChr28-S	381906	383906	Origin
TcChr28-S	382690	384690	Origin
TcChr28-S	383609	385609	Origin
TcChr28-S	382721	384721	Origin
TcChr28-S	386034	388034	Origin
TcChr28-S	383497	385497	Origin
TcChr28-S	385412	387412	Origin
TcChr28-S	384922	386922	Origin
TcChr28-S	392079	394079	Origin
TcChr28-S	392164	394164	Origin
TcChr28-S	401503	403503	Origin
TcChr28-S	446889	448889	Origin
TcChr28-S	446377	448377	Origin
TcChr28-S	449206	451206	Origin
TcChr28-S	450326	452326	Origin
TcChr28-S	452003	454003	Origin
TcChr28-S	451933	453933	Origin
TcChr28-S	453685	455685	Origin
TcChr28-S	458941	460941	Origin
TcChr28-S	471906	473906	Origin
TcChr28-S	574578	576578	Origin
TcChr28-S	625380	627380	Origin
TcChr28-S	630332	632332	Origin
TcChr28-S	642877	644877	Origin
TcChr28-S	643315	645315	Origin
TcChr28-S	644788	646788	Origin
TcChr28-S	649602	651602	Origin
TcChr28-S	651651	653651	Origin
TcChr28-S	672257	674257	Origin
TcChr28-S	672850	674850	Origin
TcChr28-S	675973	677973	Origin
TcChr28-S	673561	675561	Origin
TcChr28-S	676182	678182	Origin
TcChr28-S	673930	675930	Origin
TcChr28-S	677683	679683	Origin
TcChr28-S	675206	677206	Origin
TcChr28-S	676738	678738	Origin
TcChr29-S	3950	5950	Origin
TcChr29-S	6596	8596	Origin
TcChr29-S	7754	9754	Origin
TcChr29-S	27107	29107	Origin
TcChr29-S	28694	30694	Origin
TcChr29-S	33550	35550	Origin
TcChr29-S	31829	33829	Origin
TcChr29-S	36481	38481	Origin
TcChr29-S	38369	40369	Origin
TcChr29-S	40047	42047	Origin
TcChr29-S	42144	44144	Origin
TcChr29-S	45576	47576	Origin
TcChr29-S	45327	47327	Origin
TcChr29-S	48063	50063	Origin
TcChr29-S	63372	65372	Origin
TcChr29-S	68583	70583	Origin
TcChr29-S	68548	70548	Origin
TcChr29-S	69122	71122	Origin
TcChr29-S	70352	72352	Origin
TcChr29-S	398935	400935	Origin
TcChr29-S	403903	405903	Origin
TcChr29-S	406424	408424	Origin
TcChr29-S	417883	419883	Origin
TcChr29-S	421587	423587	Origin
TcChr29-S	421547	423547	Origin
TcChr29-S	431383	433383	Origin
TcChr29-S	439469	441469	Origin
TcChr29-S	446516	448516	Origin
TcChr29-S	448188	450188	Origin
TcChr29-S	452884	454884	Origin
TcChr29-S	456629	458629	Origin
TcChr29-S	464772	466772	Origin
TcChr29-S	470002	472002	Origin
TcChr29-S	472213	474213	Origin
TcChr29-S	470335	472335	Origin
TcChr29-S	473680	475680	Origin
TcChr29-S	476531	478531	Origin
TcChr29-S	478679	480679	Origin
TcChr29-S	484083	486083	Origin
TcChr29-S	492451	494451	Origin
TcChr29-S	497646	499646	Origin
TcChr29-S	513135	515135	Origin
TcChr29-S	513717	515717	Origin
TcChr29-S	519381	521381	Origin
TcChr29-S	518210	520210	Origin
TcChr29-S	517300	519300	Origin
TcChr29-S	525016	527016	Origin
TcChr29-S	566537	568537	Origin
TcChr29-S	567166	569166	Origin
TcChr29-S	573305	575305	Origin
TcChr29-S	574064	576064	Origin
TcChr29-S	578709	580709	Origin
TcChr29-S	581944	583944	Origin
TcChr29-S	644291	646291	Origin
TcChr29-S	659919	661919	Origin
TcChr29-S	663681	665681	Origin
TcChr29-S	669476	671476	Origin
TcChr29-S	672510	674510	Origin
TcChr29-S	683696	685696	Origin
TcChr29-S	685097	687097	Origin
TcChr29-S	689645	691645	Origin
TcChr29-S	691764	693764	Origin
TcChr29-S	701080	703080	Origin
TcChr29-S	705322	707322	Origin
TcChr29-S	706220	708220	Origin
TcChr29-S	712317	714317	Origin
TcChr29-S	710470	712470	Origin
TcChr29-S	714141	716141	Origin
TcChr29-S	730520	732520	Origin
TcChr29-S	731107	733107	Origin
TcChr29-S	732460	734460	Origin
TcChr29-S	747073	749073	Origin
TcChr29-S	747471	749471	Origin
TcChr29-S	747760	749760	Origin
TcChr29-S	751094	753094	Origin
TcChr29-S	752684	754684	Origin
TcChr29-S	753473	755473	Origin
TcChr29-S	757334	759334	Origin
TcChr29-S	762965	764965	Origin
TcChr29-S	776015	778015	Origin
TcChr29-S	777417	779417	Origin
TcChr29-S	800152	802152	Origin
TcChr29-S	801704	803704	Origin
TcChr29-S	810075	812075	Origin
TcChr29-S	810984	812984	Origin
TcChr29-S	814716	816716	Origin
TcChr29-S	824718	826718	Origin
TcChr29-S	827221	829221	Origin
TcChr29-S	830967	832967	Origin
TcChr29-S	836740	838740	Origin
TcChr29-S	841233	843233	Origin
TcChr29-S	842581	844581	Origin
TcChr29-S	845302	847302	Origin
TcChr2-S	6374	8374	Origin
TcChr2-S	11043	13043	Origin
TcChr2-S	13044	15044	Origin
TcChr2-S	17951	19951	Origin
TcChr2-S	18736	20736	Origin
TcChr2-S	23174	25174	Origin
TcChr2-S	21686	23686	Origin
TcChr2-S	31323	33323	Origin
TcChr2-S	33839	35839	Origin
TcChr2-S	44279	46279	Origin
TcChr2-S	39940	41940	Origin
TcChr2-S	43666	45666	Origin
TcChr2-S	51149	53149	Origin
TcChr2-S	48011	50011	Origin
[truncated: 7,310 more rows]

## Sheet: Table-S2
ST2. Resulting coordinated of mergers
Chromosome	Start	End	Number of events
TcChr10-S	34204	36204	1	Origin
TcChr10-S	39233	47916	7	Origin
TcChr10-S	56404	59955	2	Origin
TcChr10-S	104937	109350	2	Origin
TcChr10-S	150766	158387	4	Origin
TcChr10-S	161149	163149	1	Origin
TcChr10-S	166695	171688	4	Origin
TcChr10-S	188270	190270	1	Origin
TcChr10-S	191755	196150	2	Origin
TcChr10-S	199077	201077	1	Origin
TcChr10-S	249620	251620	1	Origin
TcChr10-S	267104	269104	1	Origin
TcChr10-S	277545	283285	3	Origin
TcChr10-S	284411	287128	3	Origin
TcChr10-S	291082	293976	2	Origin
TcChr10-S	297053	299053	1	Origin
TcChr10-S	317659	322454	5	Origin
TcChr10-S	337376	339376	1	Origin
TcChr10-S	384205	386205	1	Origin
TcChr10-S	399078	401078	1	Origin
TcChr10-S	414051	416051	1	Origin
TcChr10-S	420223	425866	3	Origin
TcChr10-S	427668	432455	4	Origin
TcChr10-S	436474	438474	1	Origin
TcChr10-S	456838	458838	1	Origin
TcChr10-S	470644	472644	1	Origin
TcChr10-S	482064	485841	5	Origin
TcChr11-S	17925	19925	1	Origin
TcChr11-S	29092	35013	8	Origin
TcChr11-S	46637	49054	2	Origin
TcChr11-S	52024	54024	1	Origin
TcChr11-S	137064	139064	1	Origin
TcChr11-S	141883	145973	5	Origin
TcChr11-S	147088	149088	1	Origin
TcChr11-S	152109	154109	1	Origin
TcChr11-S	155296	157296	1	Origin
TcChr11-S	160010	162010	1	Origin
TcChr11-S	165958	170703	3	Origin
TcChr11-S	176641	179361	2	Origin
TcChr11-S	187086	189576	2	Origin
TcChr11-S	192790	194790	1	Origin
TcChr11-S	211775	222616	7	Origin
TcChr11-S	226270	228791	2	Origin
TcChr11-S	235532	237532	1	Origin
TcChr11-S	260880	265104	4	Origin
TcChr11-S	268211	270211	1	Origin
TcChr11-S	271251	281544	6	Origin
TcChr11-S	288024	290024	1	Origin
TcChr11-S	291310	296631	4	Origin
TcChr11-S	300275	302275	1	Origin
TcChr11-S	303307	305307	1	Origin
TcChr11-S	308801	310801	1	Origin
TcChr11-S	311977	316889	4	Origin
TcChr11-S	336507	340722	4	Origin
TcChr11-S	342654	345521	2	Origin
TcChr11-S	348874	350874	1	Origin
TcChr11-S	352863	355604	2	Origin
TcChr11-S	405939	407939	1	Origin
TcChr11-S	434373	437908	3	Origin
TcChr11-S	440924	446488	3	Origin
TcChr11-S	450459	452459	1	Origin
TcChr11-S	454569	457905	3	Origin
TcChr11-S	472257	474257	1	Origin
TcChr11-S	477448	479448	1	Origin
TcChr11-S	485189	487189	1	Origin
TcChr11-S	489143	491143	1	Origin
TcChr11-S	498535	500535	1	Origin
TcChr12-S	7095	9095	1	Origin
TcChr12-S	16233	20354	3	Origin
TcChr12-S	26749	28749	1	Origin
TcChr12-S	30420	35708	4	Origin
TcChr12-S	36751	38751	1	Origin
TcChr12-S	48186	50186	1	Origin
TcChr12-S	51926	53926	1	Origin
TcChr12-S	96225	98225	1	Origin
TcChr12-S	102740	104740	1	Origin
TcChr12-S	126834	128834	1	Origin
TcChr12-S	161304	164715	4	Origin
TcChr12-S	185617	187617	1	Origin
TcChr12-S	193303	195303	1	Origin
TcChr12-S	201388	212545	9	Origin
TcChr12-S	216237	218237	1	Origin
TcChr12-S	232900	239488	4	Origin
TcChr12-S	241250	243426	2	Origin
TcChr12-S	248713	252920	2	Origin
TcChr12-S	268550	270550	1	Origin
TcChr12-S	276652	282161	3	Origin
TcChr12-S	284874	286874	1	Origin
TcChr12-S	296339	299868	2	Origin
TcChr12-S	303350	308676	3	Origin
TcChr12-S	313528	315528	1	Origin
TcChr12-S	316546	318827	2	Origin
TcChr12-S	341725	343725	1	Origin
TcChr12-S	349124	351124	1	Origin
TcChr12-S	356198	358198	1	Origin
TcChr12-S	359867	361867	1	Origin
TcChr12-S	370194	372194	1	Origin
TcChr12-S	376927	378927	1	Origin
TcChr12-S	384625	386625	1	Origin
TcChr12-S	394845	396845	1	Origin
TcChr12-S	400313	403522	2	Origin
TcChr12-S	407254	409254	1	Origin
TcChr12-S	410721	416546	4	Origin
TcChr12-S	422147	425440	2	Origin
TcChr12-S	427863	429863	1	Origin
TcChr12-S	433775	435775	1	Origin
TcChr12-S	448662	450662	1	Origin
TcChr13-S	13034	15679	2	Origin
TcChr13-S	19048	21048	1	Origin
TcChr13-S	23877	25877	1	Origin
TcChr13-S	27069	29930	3	Origin
TcChr13-S	150790	153673	2	Origin
TcChr13-S	156803	158803	1	Origin
TcChr13-S	163928	168420	2	Origin
TcChr13-S	170799	172799	1	Origin
TcChr13-S	180434	186930	5	Origin
TcChr13-S	188772	190772	1	Origin
TcChr13-S	192873	194873	1	Origin
TcChr13-S	196917	201429	4	Origin
TcChr13-S	203128	208665	3	Origin
TcChr13-S	212578	216392	2	Origin
TcChr13-S	218391	220391	1	Origin
TcChr13-S	231555	235448	2	Origin
TcChr13-S	241189	243189	1	Origin
TcChr13-S	250008	252008	1	Origin
TcChr13-S	278184	284266	3	Origin
TcChr13-S	288948	290948	1	Origin
TcChr13-S	292015	294015	1	Origin
TcChr13-S	296065	304363	5	Origin
TcChr13-S	306051	308051	1	Origin
TcChr13-S	328112	330112	1	Origin
TcChr13-S	331164	335175	2	Origin
TcChr13-S	339729	345848	3	Origin
TcChr13-S	355045	360377	5	Origin
TcChr13-S	366537	368745	2	Origin
TcChr13-S	388367	402710	10	Origin
TcChr13-S	414455	422177	5	Origin
TcChr13-S	429198	434507	3	Origin
TcChr13-S	436454	438454	1	Origin
TcChr13-S	439782	452940	9	Origin
TcChr13-S	455473	457473	1	Origin
TcChr13-S	459528	463438	3	Origin
TcChr13-S	465870	469098	2	Origin
TcChr13-S	471887	476114	2	Origin
TcChr13-S	487977	489977	1	Origin
TcChr13-S	494688	499129	3	Origin
TcChr13-S	500906	502906	1	Origin
TcChr13-S	508462	512409	2	Origin
TcChr13-S	526895	528895	1	Origin
TcChr13-S	535300	538469	2	Origin
TcChr13-S	543773	545773	1	Origin
TcChr14-S	67796	69796	1	Origin
TcChr14-S	74661	76661	1	Origin
TcChr14-S	88223	90223	1	Origin
TcChr14-S	120602	131217	6	Origin
TcChr14-S	135138	138699	3	Origin
TcChr14-S	146714	148714	1	Origin
TcChr14-S	150635	153950	2	Origin
TcChr14-S	156959	160512	3	Origin
TcChr14-S	163089	167428	4	Origin
TcChr14-S	171300	177409	4	Origin
TcChr14-S	182653	186438	2	Origin
TcChr14-S	252370	256620	4	Origin
TcChr14-S	262045	265391	3	Origin
TcChr14-S	272774	279044	3	Origin
TcChr14-S	282652	284652	1	Origin
TcChr14-S	287718	289718	1	Origin
TcChr14-S	291207	293207	1	Origin
TcChr14-S	296058	300132	3	Origin
TcChr14-S	307020	310953	3	Origin
TcChr14-S	313729	316715	2	Origin
TcChr14-S	317780	324609	4	Origin
TcChr14-S	325622	327622	1	Origin
TcChr14-S	329302	331302	1	Origin
TcChr14-S	355352	357352	1	Origin
TcChr14-S	359144	361144	1	Origin
TcChr14-S	374396	376396	1	Origin
TcChr14-S	384129	388676	2	Origin
TcChr14-S	395689	401751	3	Origin
TcChr14-S	403451	405451	1	Origin
TcChr14-S	407738	411129	2	Origin
TcChr14-S	418750	423728	3	Origin
TcChr14-S	435887	437887	1	Origin
TcChr14-S	441981	443981	1	Origin
TcChr14-S	450448	455042	2	Origin
TcChr14-S	457425	459425	1	Origin
TcChr14-S	465184	467184	1	Origin
TcChr14-S	468806	476720	5	Origin
TcChr14-S	478835	480835	1	Origin
TcChr14-S	484305	488322	3	Origin
TcChr14-S	499140	501140	1	Origin
TcChr14-S	503105	505105	1	Origin
TcChr14-S	507342	509342	1	Origin
TcChr14-S	510565	512565	1	Origin
TcChr14-S	518408	522570	4	Origin
TcChr14-S	531752	533752	1	Origin
TcChr14-S	535611	537611	1	Origin
TcChr14-S	543601	545601	1	Origin
TcChr14-S	551668	553668	1	Origin
TcChr14-S	559128	563435	4	Origin
TcChr14-S	566569	568569	1	Origin
TcChr14-S	570874	572874	1	Origin
TcChr15-S	24822	27442	2	Origin
TcChr15-S	34850	36850	1	Origin
TcChr15-S	44852	46852	1	Origin
TcChr15-S	48045	50045	1	Origin
TcChr15-S	59934	63273	2	Origin
TcChr15-S	65517	68453	2	Origin
TcChr15-S	79541	82333	2	Origin
TcChr15-S	94967	96967	1	Origin
TcChr15-S	102664	104664	1	Origin
TcChr15-S	110576	112576	1	Origin
TcChr15-S	128870	130870	1	Origin
TcChr15-S	142636	144636	1	Origin
TcChr15-S	274392	276392	1	Origin
TcChr15-S	294736	296736	1	Origin
TcChr15-S	305284	309011	2	Origin
TcChr15-S	321100	328381	4	Origin
TcChr15-S	339908	341908	1	Origin
TcChr15-S	344302	347778	3	Origin
TcChr15-S	350289	352289	1	Origin
TcChr15-S	353491	355491	1	Origin
TcChr15-S	359628	361628	1	Origin
TcChr15-S	367576	369576	1	Origin
TcChr15-S	371307	374296	2	Origin
TcChr15-S	375469	379688	2	Origin
TcChr15-S	383616	385616	1	Origin
TcChr15-S	388752	391503	3	Origin
TcChr16-S	25024	27024	1	Origin
TcChr16-S	36226	38226	1	Origin
TcChr16-S	120218	122218	1	Origin
TcChr16-S	163142	165142	1	Origin
TcChr16-S	175828	179724	2	Origin
TcChr16-S	181993	184107	2	Origin
TcChr16-S	185418	190323	2	Origin
TcChr16-S	196846	198846	1	Origin
TcChr16-S	200759	202759	1	Origin
TcChr16-S	203853	207742	3	Origin
TcChr16-S	217962	222348	2	Origin
TcChr16-S	224272	226272	1	Origin
TcChr16-S	231280	233280	1	Origin
TcChr16-S	235950	237950	1	Origin
TcChr16-S	253850	255850	1	Origin
TcChr16-S	257163	259163	1	Origin
TcChr16-S	262452	264452	1	Origin
TcChr16-S	270786	273063	2	Origin
TcChr16-S	296916	298916	1	Origin
TcChr16-S	300882	307727	3	Origin
TcChr16-S	309186	311186	1	Origin
TcChr16-S	312227	314227	1	Origin
TcChr16-S	319616	321616	1	Origin
TcChr16-S	324327	326327	1	Origin
TcChr16-S	331199	333199	1	Origin
TcChr16-S	372251	374251	1	Origin
TcChr16-S	380988	384076	2	Origin
TcChr16-S	385801	388820	2	Origin
TcChr16-S	422369	424369	1	Origin
TcChr16-S	425609	427609	1	Origin
TcChr16-S	436610	438610	1	Origin
TcChr16-S	444195	446939	2	Origin
TcChr16-S	494514	496514	1	Origin
TcChr16-S	498541	503086	2	Origin
TcChr16-S	510698	512698	1	Origin
TcChr16-S	514964	516964	1	Origin
TcChr16-S	518514	520514	1	Origin
TcChr16-S	540933	544239	2	Origin
TcChr16-S	547104	553247	5	Origin
TcChr16-S	554438	556438	1	Origin
TcChr16-S	576651	578651	1	Origin
TcChr16-S	580012	582012	1	Origin
TcChr16-S	588159	590159	1	Origin
TcChr16-S	594818	596818	1	Origin
TcChr16-S	602138	604138	1	Origin
TcChr16-S	624103	626103	1	Origin
TcChr17-S	13866	15866	1	Origin
TcChr17-S	128521	134627	4	Origin
TcChr17-S	141224	143224	1	Origin
TcChr17-S	153375	156334	2	Origin
TcChr17-S	159039	163881	2	Origin
TcChr17-S	166438	168438	1	Origin
TcChr17-S	172358	174965	2	Origin
TcChr17-S	193317	195317	1	Origin
TcChr17-S	210224	212224	1	Origin
TcChr17-S	215612	217612	1	Origin
TcChr17-S	220844	222844	1	Origin
TcChr17-S	224731	226731	1	Origin
TcChr17-S	229289	231289	1	Origin
TcChr17-S	232759	234759	1	Origin
TcChr17-S	253265	255265	1	Origin
TcChr17-S	256401	258401	1	Origin
TcChr17-S	264403	266403	1	Origin
TcChr17-S	267989	269989	1	Origin
TcChr17-S	271379	273379	1	Origin
TcChr17-S	282287	284287	1	Origin
TcChr17-S	287480	295861	8	Origin
TcChr17-S	297556	299556	1	Origin
TcChr17-S	305451	307451	1	Origin
TcChr17-S	325170	327170	1	Origin
TcChr17-S	328413	331912	2	Origin
TcChr17-S	333565	336590	2	Origin
TcChr17-S	353007	355007	1	Origin
TcChr17-S	402904	404904	1	Origin
TcChr17-S	406237	408237	1	Origin
TcChr17-S	415590	418590	2	Origin
TcChr17-S	429105	431105	1	Origin
TcChr17-S	448155	451000	2	Origin
TcChr17-S	458904	461402	2	Origin
TcChr17-S	473957	475957	1	Origin
TcChr17-S	478958	480958	1	Origin
TcChr17-S	491047	493047	1	Origin
TcChr17-S	500042	502835	2	Origin
TcChr17-S	511935	515812	3	Origin
TcChr17-S	536005	539661	2	Origin
TcChr17-S	542971	549364	4	Origin
TcChr17-S	563789	568928	3	Origin
TcChr17-S	574701	576701	1	Origin
TcChr17-S	586253	588315	2	Origin
TcChr17-S	590012	592012	1	Origin
TcChr17-S	595556	597556	1	Origin
TcChr17-S	599184	601184	1	Origin
TcChr17-S	603378	606226	2	Origin
TcChr17-S	609576	611576	1	Origin
TcChr17-S	616407	618407	1	Origin
TcChr17-S	619482	625468	6	Origin
TcChr17-S	629426	631426	1	Origin
TcChr17-S	639615	641615	1	Origin
TcChr18-S	19325	21325	1	Origin
TcChr18-S	27930	31883	2	Origin
TcChr18-S	34076	37062	2	Origin
TcChr18-S	40261	46991	5	Origin
TcChr18-S	52821	54821	1	Origin
TcChr18-S	61340	63340	1	Origin
TcChr18-S	69545	71545	1	Origin
TcChr18-S	79984	81984	1	Origin
TcChr18-S	96509	100480	2	Origin
TcChr18-S	102145	108316	4	Origin
TcChr18-S	110281	117869	4	Origin
TcChr18-S	122064	125782	3	Origin
TcChr18-S	128956	130956	1	Origin
TcChr18-S	139792	149898	8	Origin
TcChr18-S	155124	159549	3	Origin
TcChr18-S	160910	162910	1	Origin
TcChr18-S	164220	169849	4	Origin
TcChr18-S	176047	180925	2	Origin
TcChr18-S	190629	192629	1	Origin
TcChr18-S	193718	195718	1	Origin
TcChr18-S	204129	206129	1	Origin
TcChr18-S	213390	215390	1	Origin
TcChr18-S	220543	222543	1	Origin
TcChr18-S	224513	227917	2	Origin
TcChr18-S	230276	232276	1	Origin
TcChr18-S	233896	235896	1	Origin
TcChr18-S	254364	257838	3	Origin
TcChr18-S	262652	264652	1	Origin
TcChr18-S	281470	283470	1	Origin
TcChr18-S	287809	289809	1	Origin
TcChr18-S	293090	295090	1	Origin
TcChr18-S	322000	324000	1	Origin
TcChr18-S	325064	329776	2	Origin
TcChr18-S	351500	353860	2	Origin
TcChr18-S	392272	398868	4	Origin
TcChr18-S	418538	420538	1	Origin
TcChr18-S	422822	427428	2	Origin
TcChr18-S	453520	455520	1	Origin
TcChr18-S	460513	462513	1	Origin
TcChr18-S	494812	497538	2	Origin
TcChr18-S	517420	519420	1	Origin
TcChr18-S	533386	536916	2	Origin
TcChr18-S	540567	542567	1	Origin
TcChr18-S	552326	554326	1	Origin
TcChr18-S	559793	561793	1	Origin
TcChr18-S	602320	606649	5	Origin
TcChr18-S	630674	634512	2	Origin
TcChr19-S	43633	45633	1	Origin
TcChr19-S	49456	51456	1	Origin
TcChr19-S	54830	56830	1	Origin
TcChr19-S	89757	93401	2	Origin
TcChr19-S	95588	97648	2	Origin
TcChr19-S	103491	106958	2	Origin
TcChr19-S	110432	112432	1	Origin
TcChr19-S	129759	131759	1	Origin
TcChr19-S	153734	155734	1	Origin
TcChr19-S	161663	163663	1	Origin
TcChr19-S	186129	188129	1	Origin
TcChr19-S	191137	194811	3	Origin
TcChr19-S	201496	203496	1	Origin
TcChr19-S	205072	207072	1	Origin
TcChr19-S	223972	225972	1	Origin
TcChr19-S	227766	233203	4	Origin
TcChr19-S	235551	237551	1	Origin
TcChr19-S	244420	249499	3	Origin
TcChr19-S	261476	264838	2	Origin
TcChr19-S	271111	275641	2	Origin
TcChr19-S	297691	299691	1	Origin
TcChr19-S	301643	303643	1	Origin
TcChr19-S	304683	308004	2	Origin
TcChr19-S	309280	312952	4	Origin
TcChr19-S	318367	324695	7	Origin
TcChr19-S	326656	334859	5	Origin
TcChr19-S	339667	348396	6	Origin
TcChr19-S	350177	357115	6	Origin
TcChr19-S	380093	392025	9	Origin
TcChr19-S	423189	428107	4	Origin
TcChr19-S	434665	444267	7	Origin
TcChr19-S	485704	487704	1	Origin
TcChr19-S	498047	500047	1	Origin
TcChr19-S	505016	507016	1	Origin
TcChr19-S	509865	515108	4	Origin
TcChr19-S	558620	562108	2	Origin
TcChr19-S	625860	627860	1	Origin
TcChr19-S	645979	647979	1	Origin
TcChr19-S	652673	654673	1	Origin
TcChr1-S	11606	13606	1	Origin
TcChr1-S	38519	44477	3	Origin
TcChr1-S	61654	63654	1	Origin
TcChr20-S	13776	15776	1	Origin
TcChr20-S	19896	22062	2	Origin
TcChr20-S	25613	27613	1	Origin
TcChr20-S	31468	34127	2	Origin
TcChr20-S	49196	53710	2	Origin
TcChr20-S	60302	62302	1	Origin
TcChr20-S	100719	102719	1	Origin
TcChr20-S	140651	144498	2	Origin
TcChr20-S	150927	154970	2	Origin
TcChr20-S	158293	161141	2	Origin
TcChr20-S	168651	170651	1	Origin
TcChr20-S	172412	174412	1	Origin
TcChr20-S	178217	180217	1	Origin
TcChr20-S	244379	250945	3	Origin
TcChr20-S	270256	273998	3	Origin
TcChr20-S	283757	287183	2	Origin
TcChr20-S	318343	320938	2	Origin
TcChr20-S	322027	324027	1	Origin
TcChr20-S	334116	336116	1	Origin
TcChr20-S	350402	352402	1	Origin
TcChr20-S	354109	358350	2	Origin
TcChr20-S	411370	413370	1	Origin
TcChr20-S	415366	417366	1	Origin
TcChr20-S	425804	427804	1	Origin
TcChr20-S	435494	439396	2	Origin
TcChr20-S	469432	471432	1	Origin
TcChr20-S	481262	484577	2	Origin
TcChr20-S	489205	491205	1	Origin
TcChr20-S	509661	511661	1	Origin
TcChr20-S	529256	531256	1	Origin
TcChr20-S	534916	536916	1	Origin
TcChr20-S	540503	542503	1	Origin
TcChr20-S	551308	553308	1	Origin
TcChr20-S	599369	601369	1	Origin
TcChr20-S	624810	626810	1	Origin
TcChr21-S	32322	42359	27	Origin
TcChr21-S	43482	46829	2	Origin
TcChr21-S	58457	60457	1	Origin
TcChr21-S	111268	113268	1	Origin
TcChr21-S	123422	125422	1	Origin
TcChr21-S	130144	136264	4	Origin
TcChr21-S	143203	149932	5	Origin
TcChr21-S	155209	162291	3	Origin
TcChr21-S	163830	166092	2	Origin
TcChr21-S	170403	172403	1	Origin
TcChr21-S	177398	179398	1	Origin
TcChr21-S	183297	185841	2	Origin
TcChr21-S	196245	198245	1	Origin
TcChr21-S	202293	204293	1	Origin
TcChr21-S	270484	272484	1	Origin
TcChr21-S	301958	307810	4	Origin
TcChr21-S	316636	318636	1	Origin
TcChr21-S	323516	325516	1	Origin
TcChr21-S	352239	354239	1	Origin
TcChr21-S	358677	360677	1	Origin
TcChr21-S	377979	381478	2	Origin
TcChr21-S	382872	387871	3	Origin
TcChr21-S	391943	398720	5	Origin
TcChr21-S	402149	405496	2	Origin
TcChr21-S	411383	418234	4	Origin
TcChr21-S	426470	430728	2	Origin
TcChr21-S	432458	438218	3	Origin
TcChr21-S	440027	442027	1	Origin
TcChr21-S	449623	451623	1	Origin
TcChr21-S	466782	475181	6	Origin
TcChr21-S	478578	480793	2	Origin
TcChr21-S	484918	486918	1	Origin
TcChr21-S	494446	499408	3	Origin
TcChr21-S	502615	504615	1	Origin
TcChr21-S	509197	511197	1	Origin
TcChr21-S	513058	515129	2	Origin
TcChr21-S	531829	533829	1	Origin
TcChr21-S	614129	616129	1	Origin
TcChr21-S	624380	626380	1	Origin
TcChr21-S	637868	639868	1	Origin
TcChr21-S	650488	652488	1	Origin
TcChr21-S	667994	669994	1	Origin
TcChr21-S	678334	680334	1	Origin
TcChr22-S	3386	5386	1	Origin
TcChr22-S	12815	22207	34	Origin
TcChr22-S	115522	117522	1	Origin
TcChr22-S	119854	126511	3	Origin
TcChr22-S	185598	189847	2	Origin
TcChr22-S	197828	199828	1	Origin
TcChr22-S	215865	217865	1	Origin
TcChr22-S	260573	266939	3	Origin
TcChr22-S	269907	271907	1	Origin
TcChr22-S	281254	285865	2	Origin
TcChr22-S	289597	295800	5	Origin
TcChr22-S	298856	300856	1	Origin
TcChr22-S	301938	303938	1	Origin
TcChr22-S	306315	315149	7	Origin
TcChr22-S	319029	321029	1	Origin
TcChr22-S	332752	340005	3	Origin
TcChr22-S	341646	343646	1	Origin
TcChr22-S	362634	364634	1	Origin
TcChr22-S	366781	368781	1	Origin
TcChr22-S	371524	373524	1	Origin
TcChr22-S	380929	385834	2	Origin
TcChr22-S	400892	407734	6	Origin
TcChr22-S	467405	472786	7	Origin
TcChr22-S	477959	481668	2	Origin
TcChr22-S	501825	503825	1	Origin
TcChr22-S	512603	514603	1	Origin
TcChr22-S	517142	519142	1	Origin
TcChr22-S	523367	525367	1	Origin
TcChr22-S	538246	541415	2	Origin
TcChr22-S	546905	550029	2	Origin
TcChr22-S	553223	557205	5	Origin
TcChr22-S	560437	562437	1	Origin
TcChr22-S	586386	588386	1	Origin
TcChr22-S	594553	598242	2	Origin
TcChr22-S	609818	613361	3	Origin
TcChr22-S	620635	623046	2	Origin
TcChr22-S	627777	632266	2	Origin
TcChr22-S	638004	644163	3	Origin
TcChr22-S	649883	651883	1	Origin
TcChr22-S	656857	658857	1	Origin
TcChr22-S	676895	684182	4	Origin
TcChr22-S	688572	690592	2	Origin
TcChr23-S	25461	27461	1	Origin
TcChr23-S	29070	31070	1	Origin
TcChr23-S	41647	43647	1	Origin
TcChr23-S	48401	50401	1	Origin
TcChr23-S	74405	79469	4	Origin
TcChr23-S	81461	84806	2	Origin
TcChr23-S	100560	104148	2	Origin
TcChr23-S	108233	110233	1	Origin
TcChr23-S	111998	115184	3	Origin
TcChr23-S	116741	124386	5	Origin
TcChr23-S	125957	138539	8	Origin
TcChr23-S	140975	145959	3	Origin
TcChr23-S	147141	152085	5	Origin
TcChr23-S	163417	166280	2	Origin
TcChr23-S	169307	171307	1	Origin
TcChr23-S	230877	232995	2	Origin
TcChr23-S	248829	250829	1	Origin
TcChr23-S	281785	286368	3	Origin
TcChr23-S	287794	289794	1	Origin
TcChr23-S	294072	296610	2	Origin
TcChr23-S	298782	301140	2	Origin
TcChr23-S	312756	314756	1	Origin
TcChr23-S	316788	318788	1	Origin
TcChr23-S	329361	332519	2	Origin
TcChr23-S	334417	339500	3	Origin
TcChr23-S	344251	346251	1	Origin
TcChr23-S	357760	364010	7	Origin
TcChr23-S	369420	371420	1	Origin
TcChr23-S	377743	379800	2	Origin
TcChr23-S	381928	385177	2	Origin
TcChr23-S	407089	410539	2	Origin
TcChr23-S	416248	422968	7	Origin
TcChr23-S	432016	435437	4	Origin
TcChr23-S	441893	443893	1	Origin
TcChr23-S	446100	448100	1	Origin
TcChr23-S	453125	459224	3	Origin
TcChr23-S	467192	469192	1	Origin
TcChr23-S	473402	475402	1	Origin
TcChr23-S	477816	479816	1	Origin
TcChr23-S	481264	483307	2	Origin
TcChr23-S	484837	486837	1	Origin
TcChr23-S	517877	523133	3	Origin
TcChr23-S	526934	532397	4	Origin
TcChr23-S	584470	586470	1	Origin
TcChr23-S	591951	593951	1	Origin
TcChr23-S	615754	617754	1	Origin
TcChr24-S	57813	62731	2	Origin
TcChr24-S	66697	68949	2	Origin
TcChr24-S	177291	179291	1	Origin
TcChr24-S	194701	196701	1	Origin
TcChr24-S	203184	206935	2	Origin
TcChr24-S	209261	212217	2	Origin
TcChr24-S	214530	216530	1	Origin
TcChr24-S	246346	249038	2	Origin
TcChr24-S	256568	258568	1	Origin
TcChr24-S	264727	266727	1	Origin
TcChr24-S	269414	271414	1	Origin
TcChr24-S	274171	285572	6	Origin
TcChr24-S	296796	299631	2	Origin
TcChr24-S	301852	304474	3	Origin
TcChr24-S	305627	313740	4	Origin
TcChr24-S	337232	339232	1	Origin
TcChr24-S	351058	353058	1	Origin
TcChr24-S	364810	366810	1	Origin
TcChr24-S	387575	389575	1	Origin
TcChr24-S	403557	407449	2	Origin
TcChr24-S	413337	416268	2	Origin
TcChr24-S	422984	424984	1	Origin
TcChr24-S	435093	437093	1	Origin
TcChr24-S	626641	629251	2	Origin
TcChr24-S	632757	634757	1	Origin
TcChr24-S	650559	652559	1	Origin
TcChr24-S	657260	667671	6	Origin
TcChr24-S	668910	673706	2	Origin
TcChr24-S	675221	677221	1	Origin
TcChr24-S	680130	682130	1	Origin
TcChr24-S	684871	690348	5	Origin
TcChr24-S	695834	697834	1	Origin
TcChr24-S	698959	700959	1	Origin
TcChr24-S	713815	715815	1	Origin
TcChr24-S	719594	721594	1	Origin
TcChr24-S	729138	731138	1	Origin
TcChr24-S	738218	740218	1	Origin
TcChr24-S	743846	750735	5	Origin
TcChr24-S	752657	757401	2	Origin
TcChr24-S	768220	772296	2	Origin
TcChr25-S	17583	33256	15	Origin
TcChr25-S	70402	72402	1	Origin
TcChr25-S	77792	79792	1	Origin
TcChr25-S	81993	86757	3	Origin
TcChr25-S	94442	96442	1	Origin
TcChr25-S	103538	105538	1	Origin
TcChr25-S	114445	117674	3	Origin
TcChr25-S	118863	123068	4	Origin
TcChr25-S	124814	127254	2	Origin
TcChr25-S	135385	137385	1	Origin
TcChr25-S	162984	164984	1	Origin
TcChr25-S	183318	187280	3	Origin
TcChr25-S	191438	194136	3	Origin
TcChr25-S	197178	199178	1	Origin
TcChr25-S	202154	204716	2	Origin
TcChr25-S	206423	208423	1	Origin
TcChr25-S	217297	219297	1	Origin
TcChr25-S	220544	222544	1	Origin
TcChr25-S	223925	226348	2	Origin
TcChr25-S	227800	232193	3	Origin
TcChr25-S	234900	238827	2	Origin
TcChr25-S	240095	242095	1	Origin
TcChr25-S	267170	270586	2	Origin
TcChr25-S	279934	284853	4	Origin
TcChr25-S	318428	321319	2	Origin
TcChr25-S	328512	330512	1	Origin
TcChr25-S	331950	334376	2	Origin
TcChr25-S	336769	340261	2	Origin
TcChr25-S	346028	348028	1	Origin
TcChr25-S	349562	355619	4	Origin
TcChr25-S	357056	359056	1	Origin
TcChr25-S	389153	403156	13	Origin
TcChr25-S	405754	407754	1	Origin
TcChr25-S	425088	427088	1	Origin
TcChr25-S	448879	453866	2	Origin
TcChr25-S	463380	465380	1	Origin
TcChr25-S	613236	616287	2	Origin
TcChr25-S	622113	625262	3	Origin
TcChr25-S	627069	630607	2	Origin
TcChr25-S	633903	635903	1	Origin
TcChr25-S	639853	643527	2	Origin
TcChr25-S	648037	650037	1	Origin
TcChr25-S	662026	664026	1	Origin
TcChr26-S	17252	19736	2	Origin
TcChr26-S	22088	24088	1	Origin
TcChr26-S	39651	41651	1	Origin
TcChr26-S	73309	77224	2	Origin
TcChr26-S	79766	84509	3	Origin
TcChr26-S	86093	90284	2	Origin
TcChr26-S	103485	109152	4	Origin
TcChr26-S	113835	115835	1	Origin
TcChr26-S	146223	151271	3	Origin
TcChr26-S	154946	158417	2	Origin
TcChr26-S	165291	167555	2	Origin
TcChr26-S	169029	171029	1	Origin
TcChr26-S	178516	180516	1	Origin
TcChr26-S	183195	188433	5	Origin
TcChr26-S	196679	200615	5	Origin
TcChr26-S	213612	215612	1	Origin
TcChr26-S	223873	225873	1	Origin
TcChr26-S	231095	235506	2	Origin
TcChr26-S	245869	247869	1	Origin
TcChr26-S	253080	255080	1	Origin
TcChr26-S	257297	259297	1	Origin
TcChr26-S	261655	265175	2	Origin
TcChr26-S	282697	287287	2	Origin
TcChr26-S	334954	336954	1	Origin
TcChr26-S	351599	353599	1	Origin
TcChr26-S	355001	362183	8	Origin
TcChr26-S	364099	368348	5	Origin
TcChr26-S	369557	371557	1	Origin
TcChr26-S	381386	384627	2	Origin
TcChr26-S	424985	426985	1	Origin
TcChr26-S	431032	442222	5	Origin
TcChr26-S	443729	445729	1	Origin
TcChr26-S	449534	453468	2	Origin
TcChr26-S	461492	463492	1	Origin
TcChr26-S	467551	469551	1	Origin
TcChr26-S	472274	474274	1	Origin
TcChr26-S	475708	479016	2	Origin
TcChr26-S	480263	482263	1	Origin
TcChr26-S	484634	486634	1	Origin
TcChr26-S	492373	494373	1	Origin
TcChr26-S	497459	499459	1	Origin
TcChr26-S	502167	508873	3	Origin
TcChr26-S	519048	521048	1	Origin
TcChr26-S	522811	524811	1	Origin
TcChr26-S	526168	529758	3	Origin
TcChr26-S	532681	536317	2	Origin
TcChr26-S	537488	539488	1	Origin
TcChr26-S	560723	565687	4	Origin
TcChr26-S	578440	580440	1	Origin
TcChr26-S	581826	586734	5	Origin
TcChr26-S	588984	590984	1	Origin
TcChr26-S	606812	613154	4	Origin
TcChr26-S	615813	617813	1	Origin
TcChr26-S	621357	627247	4	Origin
TcChr26-S	628555	630555	1	Origin
TcChr26-S	675010	679784	2	Origin
TcChr26-S	685699	692669	4	Origin
TcChr26-S	698438	704337	4	Origin
TcChr26-S	705639	715787	5	Origin
TcChr26-S	717932	721736	2	Origin
TcChr26-S	723603	725798	2	Origin
TcChr26-S	731857	733857	1	Origin
TcChr26-S	743791	746944	2	Origin
TcChr26-S	752457	754457	1	Origin
TcChr26-S	760549	762549	1	Origin
TcChr26-S	775342	777760	3	Origin
TcChr27-S	17542	19542	1	Origin
TcChr27-S	24837	26837	1	Origin
TcChr27-S	29873	34686	3	Origin
TcChr27-S	37065	39065	1	Origin
TcChr27-S	44476	46804	2	Origin
TcChr27-S	49342	51342	1	Origin
TcChr27-S	54957	57721	2	Origin
TcChr27-S	60681	65559	3	Origin
TcChr27-S	69936	74226	3	Origin
TcChr27-S	77880	79880	1	Origin
TcChr27-S	93604	95604	1	Origin
TcChr27-S	100688	102688	1	Origin
TcChr27-S	105487	107487	1	Origin
TcChr27-S	122952	124952	1	Origin
TcChr27-S	127725	139969	8	Origin
TcChr27-S	144752	146752	1	Origin
TcChr27-S	149405	154506	3	Origin
TcChr27-S	156037	162358	4	Origin
TcChr27-S	165549	169973	2	Origin
TcChr27-S	173311	183921	5	Origin
TcChr27-S	185699	187699	1	Origin
TcChr27-S	190109	192240	2	Origin
TcChr27-S	197257	200792	3	Origin
TcChr27-S	244120	246120	1	Origin
TcChr27-S	253070	259115	5	Origin
TcChr27-S	260513	263683	2	Origin
TcChr27-S	270675	272675	1	Origin
TcChr27-S	273925	278420	4	Origin
TcChr27-S	295034	299606	3	Origin
TcChr27-S	308908	310908	1	Origin
TcChr27-S	318675	320675	1	Origin
TcChr27-S	333024	335024	1	Origin
TcChr27-S	339595	341595	1	Origin
TcChr27-S	346806	350702	3	Origin
TcChr27-S	352684	354684	1	Origin
TcChr27-S	359955	362727	3	Origin
TcChr27-S	365248	367970	2	Origin
TcChr27-S	369231	371231	1	Origin
TcChr27-S	380387	391287	7	Origin
TcChr27-S	394426	399462	6	Origin
TcChr27-S	402175	404175	1	Origin
TcChr27-S	406426	408426	1	Origin
TcChr27-S	421207	423207	1	Origin
TcChr27-S	424510	428310	3	Origin
TcChr27-S	443797	445797	1	Origin
TcChr27-S	446905	448905	1	Origin
TcChr27-S	450178	455822	5	Origin
TcChr27-S	460024	462024	1	Origin
TcChr27-S	465060	469053	3	Origin
TcChr27-S	470799	475850	4	Origin
TcChr27-S	479127	481127	1	Origin
TcChr27-S	493846	495846	1	Origin
TcChr27-S	497422	499422	1	Origin
TcChr27-S	501569	506508	6	Origin
TcChr27-S	512900	517240	6	Origin
TcChr27-S	531351	533351	1	Origin
TcChr27-S	542493	544493	1	Origin
TcChr27-S	568067	570067	1	Origin
TcChr27-S	575975	578505	2	Origin
TcChr27-S	582599	594539	7	Origin
TcChr27-S	602128	604401	2	Origin
TcChr27-S	615389	628066	8	Origin
TcChr27-S	634827	643271	8	Origin
TcChr27-S	647502	649900	2	Origin
TcChr27-S	651730	653730	1	Origin
TcChr27-S	658088	661792	2	Origin
TcChr27-S	663302	665302	1	Origin
TcChr27-S	671757	678664	8	Origin
TcChr27-S	680090	682090	1	Origin
TcChr27-S	688188	694686	5	Origin
TcChr27-S	702557	704990	2	Origin
TcChr27-S	707133	711881	5	Origin
TcChr27-S	712943	714943	1	Origin
TcChr27-S	716101	718101	1	Origin
TcChr27-S	756277	758743	2	Origin
TcChr27-S	762368	764368	1	Origin
TcChr27-S	771527	773527	1	Origin
TcChr27-S	774672	776672	1	Origin
TcChr27-S	779745	788238	6	Origin
TcChr28-S	18509	20509	1	Origin
TcChr28-S	24256	26256	1	Origin
TcChr28-S	58253	60253	1	Origin
TcChr28-S	64696	67716	2	Origin
TcChr28-S	74458	76458	1	Origin
TcChr28-S	79985	84600	2	Origin
TcChr28-S	85615	93308	4	Origin
TcChr28-S	97800	99800	1	Origin
TcChr28-S	108229	115244	5	Origin
TcChr28-S	118371	125292	5	Origin
TcChr28-S	134570	139583	5	Origin
TcChr28-S	157581	159581	1	Origin
TcChr28-S	162463	164463	1	Origin
TcChr28-S	166766	168766	1	Origin
TcChr28-S	174128	183550	5	Origin
TcChr28-S	188636	195024	4	Origin
TcChr28-S	205747	209995	2	Origin
TcChr28-S	220403	222403	1	Origin
TcChr28-S	227656	229656	1	Origin
TcChr28-S	246559	248559	1	Origin
TcChr28-S	264301	268640	3	Origin
TcChr28-S	294427	296427	1	Origin
TcChr28-S	353879	355879	1	Origin
TcChr28-S	359602	361602	1	Origin
TcChr28-S	366732	368732	1	Origin
TcChr28-S	370789	372789	1	Origin
TcChr28-S	374285	385592	13	Origin
TcChr28-S	389391	391391	1	Origin
TcChr28-S	400033	402033	1	Origin
TcChr28-S	443283	459906	19	Origin
TcChr28-S	465008	467008	1	Origin
TcChr28-S	468697	470697	1	Origin
TcChr28-S	569978	574285	2	Origin
TcChr28-S	618625	620625	1	Origin
TcChr28-S	625969	627969	1	Origin
TcChr28-S	639446	642812	3	Origin
TcChr28-S	650125	652125	1	Origin
TcChr28-S	657153	660490	2	Origin
TcChr29-S	10921	12921	1	Origin
TcChr29-S	25990	33404	9	Origin
TcChr29-S	35530	37530	1	Origin
TcChr29-S	49909	51909	1	Origin
TcChr29-S	53119	55119	1	Origin
TcChr29-S	58943	60943	1	Origin
TcChr29-S	79277	82517	2	Origin
TcChr29-S	392126	394126	1	Origin
TcChr29-S	413084	416176	3	Origin
TcChr29-S	439022	441527	3	Origin
TcChr29-S	444627	446627	1	Origin
TcChr29-S	454507	456507	1	Origin
TcChr29-S	459572	468027	5	Origin
TcChr29-S	473755	478286	2	Origin
TcChr29-S	487498	489498	1	Origin
TcChr29-S	496503	498503	1	Origin
TcChr29-S	502380	504380	1	Origin
TcChr29-S	510927	512927	1	Origin
TcChr29-S	519489	522177	2	Origin
TcChr29-S	523583	525583	1	Origin
TcChr29-S	527640	529640	1	Origin
TcChr29-S	557838	566774	9	Origin
TcChr29-S	574923	577956	2	Origin
TcChr29-S	579686	584460	2	Origin
TcChr29-S	649764	651764	1	Origin
TcChr29-S	678072	682365	2	Origin
TcChr29-S	690465	692465	1	Origin
TcChr29-S	693720	699796	4	Origin
TcChr29-S	710226	712226	1	Origin
TcChr29-S	725332	730888	4	Origin
TcChr29-S	736798	741257	2	Origin
TcChr29-S	749900	751900	1	Origin
TcChr29-S	754418	756634	2	Origin
TcChr29-S	758044	760044	1	Origin
TcChr29-S	762920	764920	1	Origin
TcChr29-S	769344	771344	1	Origin
TcChr29-S	772537	774601	2	Origin
TcChr29-S	776358	778358	1	Origin
TcChr29-S	780133	782133	1	Origin
TcChr29-S	784563	786563	1	Origin
TcChr29-S	789602	791602	1	Origin
TcChr29-S	808416	810416	1	Origin
TcChr29-S	816422	818422	1	Origin
TcChr29-S	823190	825190	1	Origin
TcChr29-S	826686	828686	1	Origin
TcChr29-S	831390	833411	2	Origin
TcChr29-S	840167	842167	1	Origin
TcChr29-S	843852	845852	1	Origin
TcChr2-S	2972	5082	2	Origin
TcChr2-S	12124	14124	1	Origin
TcChr2-S	32864	41238	5	Origin
TcChr2-S	45962	47962	1	Origin
TcChr2-S	76937	79344	2	Origin
TcChr2-S	80592	91865	8	Origin
TcChr2-S	114471	116471	1	Origin
TcChr2-S	117711	121273	4	Origin
TcChr2-S	123611	125611	1	Origin
TcChr2-S	131962	134676	2	Origin
TcChr2-S	144097	146097	1	Origin
TcChr30-S	33598	35598	1	Origin
TcChr30-S	47744	55829	4	Origin
TcChr30-S	88974	90974	1	Origin
TcChr30-S	92257	94257	1	Origin
TcChr30-S	101220	105511	2	Origin
TcChr30-S	150033	154905	4	Origin
TcChr30-S	156255	160926	2	Origin
TcChr30-S	169991	171991	1	Origin
TcChr30-S	182815	184815	1	Origin
TcChr30-S	188077	190077	1	Origin
TcChr30-S	196647	198647	1	Origin
TcChr30-S	204286	206286	1	Origin
TcChr30-S	256148	260464	4	Origin
TcChr30-S	261542	263542	1	Origin
TcChr30-S	265210	267210	1	Origin
TcChr30-S	269305	272866	2	Origin
TcChr30-S	320366	322366	1	Origin
TcChr30-S	331540	333844	2	Origin
TcChr30-S	336242	342417	5	Origin
TcChr30-S	343929	345929	1	Origin
TcChr30-S	365664	368429	2	Origin
TcChr30-S	379649	386782	5	Origin
TcChr30-S	479933	484171	2	Origin
TcChr30-S	493095	495095	1	Origin
TcChr30-S	497492	499492	1	Origin
TcChr30-S	523363	525363	1	Origin
TcChr30-S	542971	544971	1	Origin
TcChr30-S	548331	550331	1	Origin
TcChr30-S	570569	578515	5	Origin
TcChr30-S	581573	583573	1	Origin
TcChr30-S	601149	603149	1	Origin
TcChr30-S	609742	614724	2	Origin
TcChr30-S	617172	619172	1	Origin
TcChr30-S	663416	666556	3	Origin
TcChr30-S	669496	671496	1	Origin
TcChr30-S	697151	699151	1	Origin
TcChr30-S	704036	707948	2	Origin
TcChr30-S	713207	715640	2	Origin
TcChr30-S	729094	732521	2	Origin
TcChr30-S	735891	737891	1	Origin
TcChr30-S	738971	740971	1	Origin
TcChr30-S	745041	747041	1	Origin
TcChr30-S	754965	758099	2	Origin
TcChr30-S	762583	764583	1	Origin
TcChr30-S	781303	785516	3	Origin
TcChr30-S	788173	790641	2	Origin
TcChr30-S	792235	794235	1	Origin
TcChr30-S	795378	798880	4	Origin
TcChr30-S	804013	807977	2	Origin
TcChr31-S	48062	50062	1	Origin
TcChr31-S	140973	142973	1	Origin
TcChr31-S	144830	148969	2	Origin
TcChr31-S	150436	152436	1	Origin
TcChr31-S	156733	158733	1	Origin
TcChr31-S	183480	185480	1	Origin
TcChr31-S	187959	189959	1	Origin
TcChr31-S	193237	195237	1	Origin
TcChr31-S	213470	215470	1	Origin
TcChr31-S	232581	234581	1	Origin
TcChr31-S	253546	257934	4	Origin
TcChr31-S	295004	297603	2	Origin
TcChr31-S	349477	354076	2	Origin
TcChr31-S	355100	358939	3	Origin
TcChr31-S	359989	378757	14	Origin
TcChr31-S	397713	399713	1	Origin
TcChr31-S	454404	456656	2	Origin
TcChr31-S	458381	460381	1	Origin
TcChr31-S	462274	464274	1	Origin
TcChr31-S	466312	468312	1	Origin
TcChr31-S	560141	562305	2	Origin
TcChr31-S	564015	573166	6	Origin
TcChr31-S	574169	576169	1	Origin
TcChr31-S	579125	581125	1	Origin
TcChr31-S	584077	586314	2	Origin
TcChr31-S	588520	591543	2	Origin
TcChr31-S	594622	598123	3	Origin
TcChr31-S	602169	604169	1	Origin
TcChr31-S	627369	631057	2	Origin
TcChr31-S	633113	635329	2	Origin
TcChr31-S	637984	639984	1	Origin
TcChr31-S	644611	648003	2	Origin
TcChr31-S	652130	654130	1	Origin
TcChr31-S	658404	664946	5	Origin
TcChr31-S	711448	713448	1	Origin
TcChr31-S	719510	721707	2	Origin
TcChr31-S	742044	746289	2	Origin
TcChr31-S	748939	753278	3	Origin
TcChr31-S	796072	803349	7	Origin
TcChr31-S	806924	808924	1	Origin
TcChr31-S	878271	880271	1	Origin
TcChr31-S	898065	900065	1	Origin
TcChr31-S	911871	913871	1	Origin
TcChr31-S	918928	920928	1	Origin
TcChr32-S	107634	109634	1	Origin
TcChr32-S	114106	116106	1	Origin
TcChr32-S	118752	120752	1	Origin
TcChr32-S	122541	128662	3	Origin
TcChr32-S	133849	135849	1	Origin
TcChr32-S	275783	282361	8	Origin
TcChr32-S	287307	289307	1	Origin
TcChr32-S	310837	315187	2	Origin
TcChr32-S	320987	322987	1	Origin
TcChr32-S	324925	333385	4	Origin
TcChr32-S	335977	338149	2	Origin
TcChr32-S	339636	342551	2	Origin
TcChr32-S	347277	349277	1	Origin
TcChr32-S	352454	354454	1	Origin
TcChr32-S	356172	359087	3	Origin
TcChr32-S	361270	366977	4	Origin
TcChr32-S	368191	375960	5	Origin
TcChr32-S	381058	383058	1	Origin
TcChr32-S	386598	388598	1	Origin
TcChr32-S	390908	399847	5	Origin
TcChr32-S	424235	426235	1	Origin
TcChr32-S	440247	442247	1	Origin
TcChr32-S	451426	453426	1	Origin
TcChr32-S	456501	458501	1	Origin
TcChr32-S	468844	470844	1	Origin
TcChr32-S	486302	491274	3	Origin
TcChr32-S	494201	496201	1	Origin
TcChr32-S	497440	499440	1	Origin
TcChr32-S	500799	503445	2	Origin
TcChr32-S	517391	523393	4	Origin
TcChr32-S	528822	530822	1	Origin
TcChr32-S	535428	538084	2	Origin
TcChr32-S	549014	551014	1	Origin
TcChr32-S	557246	559246	1	Origin
TcChr32-S	621651	625709	2	Origin
TcChr32-S	627188	633092	4	Origin
TcChr32-S	642747	644747	1	Origin
TcChr32-S	648884	650884	1	Origin
TcChr32-S	667491	669491	1	Origin
TcChr32-S	674742	680378	4	Origin
TcChr32-S	733279	738210	2	Origin
TcChr32-S	745073	747073	1	Origin
TcChr32-S	772667	774667	1	Origin
TcChr32-S	779542	787175	4	Origin
TcChr32-S	798528	802170	3	Origin
TcChr32-S	809040	812261	3	Origin
TcChr32-S	815611	819247	2	Origin
TcChr32-S	826805	830006	2	Origin
TcChr32-S	832864	834964	2	Origin
TcChr32-S	837655	842316	2	Origin
TcChr32-S	852909	857020	3	Origin
TcChr32-S	860853	869129	7	Origin
TcChr32-S	877705	883118	3	Origin
TcChr32-S	885040	887040	1	Origin
TcChr32-S	892807	894807	1	Origin
TcChr32-S	896446	904905	4	Origin
TcChr32-S	906061	911031	5	Origin
TcChr32-S	914252	916252	1	Origin
TcChr32-S	918894	920894	1	Origin
TcChr32-S	923040	926023	3	Origin
TcChr32-S	933951	938733	2	Origin
TcChr32-S	944718	946718	1	Origin
TcChr32-S	948541	956075	6	Origin
TcChr33-S	51252	53252	1	Origin
TcChr33-S	57356	60730	2	Origin
TcChr33-S	63171	65171	1	Origin
TcChr33-S	72806	74806	1	Origin
TcChr33-S	77633	82897	3	Origin
TcChr33-S	85904	87904	1	Origin
TcChr33-S	91240	100390	6	Origin
TcChr33-S	109977	113872	2	Origin
TcChr33-S	119975	122887	3	Origin
TcChr33-S	128746	132334	3	Origin
TcChr33-S	137006	139006	1	Origin
TcChr33-S	163368	168144	2	Origin
TcChr33-S	171096	179759	4	Origin
TcChr33-S	182383	185597	2	Origin
TcChr33-S	194793	196793	1	Origin
TcChr33-S	217586	220364	2	Origin
TcChr33-S	226593	228840	3	Origin
TcChr33-S	232589	234589	1	Origin
TcChr33-S	258329	260329	1	Origin
TcChr33-S	266062	269587	2	Origin
TcChr33-S	277063	279730	2	Origin
TcChr33-S	458099	466205	4	Origin
TcChr33-S	490195	495813	3	Origin
TcChr33-S	497598	499598	1	Origin
TcChr33-S	506468	509395	2	Origin
TcChr33-S	511328	513328	1	Origin
TcChr33-S	517511	520599	4	Origin
TcChr33-S	528592	530592	1	Origin
TcChr33-S	536763	540618	2	Origin
TcChr33-S	542734	547111	2	Origin
TcChr33-S	553914	555914	1	Origin
TcChr33-S	560810	565261	2	Origin
TcChr33-S	584910	590576	3	Origin
TcChr33-S	591823	593823	1	Origin
TcChr33-S	598237	610841	8	Origin
TcChr33-S	615693	622474	3	Origin
TcChr33-S	658700	660700	1	Origin
TcChr33-S	681375	683375	1	Origin
TcChr33-S	684807	687806	2	Origin
TcChr33-S	735235	737235	1	Origin
TcChr33-S	793507	804333	6	Origin
TcChr33-S	808295	810295	1	Origin
TcChr33-S	811774	813774	1	Origin
TcChr33-S	822824	824824	1	Origin
TcChr33-S	833474	835474	1	Origin
TcChr33-S	837182	839182	1	Origin
TcChr33-S	848172	851159	2	Origin
TcChr33-S	853087	858219	3	Origin
TcChr33-S	868726	873832	3	Origin
TcChr33-S	925284	927284	1	Origin
TcChr33-S	936987	938987	1	Origin
TcChr33-S	941459	943459	1	Origin
TcChr33-S	945368	950214	2	Origin
TcChr33-S	951244	953861	3	Origin
TcChr33-S	1003862	1005862	1	Origin
TcChr33-S	1009563	1011563	1	Origin
TcChr33-S	1016497	1018497	1	Origin
TcChr33-S	1031391	1033391	1	Origin
TcChr34-S	11792	14190	2	Origin
TcChr34-S	16749	19647	4	Origin
TcChr34-S	22867	25397	2	Origin
TcChr34-S	44787	46787	1	Origin
TcChr34-S	55365	57365	1	Origin
TcChr34-S	65953	67953	1	Origin
TcChr34-S	70399	72399	1	Origin
TcChr34-S	75436	80308	2	Origin
TcChr34-S	81654	83654	1	Origin
TcChr34-S	256002	258002	1	Origin
TcChr34-S	264912	266912	1	Origin
TcChr34-S	285507	287507	1	Origin
TcChr34-S	294287	296287	1	Origin
TcChr34-S	300529	308951	4	Origin
TcChr34-S	331807	333807	1	Origin
TcChr34-S	414677	416913	2	Origin
TcChr34-S	418711	420711	1	Origin
TcChr34-S	422062	426754	3	Origin
TcChr34-S	429319	431367	2	Origin
TcChr34-S	434497	436497	1	Origin
TcChr34-S	448425	455800	3	Origin
TcChr34-S	467804	472390	3	Origin
TcChr34-S	474096	476096	1	Origin
TcChr34-S	478884	481178	2	Origin
TcChr34-S	497571	501471	2	Origin
TcChr34-S	504605	506605	1	Origin
TcChr34-S	515491	517491	1	Origin
TcChr34-S	523925	525925	1	Origin
TcChr34-S	682796	685528	2	Origin
TcChr34-S	686762	688762	1	Origin
TcChr34-S	691230	695685	3	Origin
TcChr34-S	699411	701411	1	Origin
TcChr34-S	712679	714679	1	Origin
TcChr34-S	718695	720695	1	Origin
TcChr34-S	722489	724489	1	Origin
TcChr34-S	726143	728606	2	Origin
TcChr34-S	730106	735098	4	Origin
TcChr34-S	738563	742546	3	Origin
TcChr34-S	755206	759138	3	Origin
TcChr34-S	761325	763325	1	Origin
TcChr34-S	765568	767568	1	Origin
TcChr34-S	791430	798211	3	Origin
TcChr34-S	828645	830645	1	Origin
TcChr34-S	834919	841872	3	Origin
TcChr34-S	845131	847131	1	Origin
TcChr34-S	855662	857662	1	Origin
TcChr34-S	865721	870852	3	Origin
TcChr34-S	873973	875973	1	Origin
TcChr34-S	879953	881953	1	Origin
TcChr34-S	886449	888665	2	Origin
TcChr34-S	931724	933724	1	Origin
TcChr34-S	936451	938451	1	Origin
TcChr34-S	943237	947127	2	Origin
TcChr34-S	948795	950795	1	Origin
TcChr34-S	956951	961155	3	Origin
TcChr34-S	989649	992429	2	Origin
TcChr34-S	1028568	1030568	1	Origin
TcChr34-S	1050384	1052384	1	Origin
TcChr35-S	88749	90749	1	Origin
TcChr35-S	91933	93933	1	Origin
TcChr35-S	105458	107458	1	Origin
TcChr35-S	111115	113115	1	Origin
TcChr35-S	138472	150002	10	Origin
TcChr35-S	152428	154428	1	Origin
TcChr35-S	155687	159293	2	Origin
TcChr35-S	170132	175336	3	Origin
TcChr35-S	184908	188989	2	Origin
TcChr35-S	192908	194908	1	Origin
TcChr35-S	198811	201277	2	Origin
TcChr35-S	205253	221072	10	Origin
TcChr35-S	223045	230369	4	Origin
TcChr35-S	231841	234708	2	Origin
TcChr35-S	236486	238486	1	Origin
TcChr35-S	240099	245473	4	Origin
TcChr35-S	273055	275055	1	Origin
TcChr35-S	283325	285325	1	Origin
TcChr35-S	311690	313690	1	Origin
TcChr35-S	329148	331148	1	Origin
TcChr35-S	335233	337233	1	Origin
TcChr35-S	351246	353246	1	Origin
TcChr35-S	364512	366512	1	Origin
TcChr35-S	368483	370483	1	Origin
TcChr35-S	371600	374124	2	Origin
TcChr35-S	375294	377294	1	Origin
TcChr35-S	379506	381506	1	Origin
TcChr35-S	384306	389566	3	Origin
TcChr35-S	391563	394230	3	Origin
TcChr35-S	395299	397299	1	Origin
TcChr35-S	414903	416903	1	Origin
TcChr35-S	419017	421017	1	Origin
TcChr35-S	463360	465360	1	Origin
TcChr35-S	476736	478736	1	Origin
TcChr35-S	492606	499448	5	Origin
TcChr35-S	504554	506554	1	Origin
TcChr35-S	512288	516158	2	Origin
TcChr35-S	539060	541184	2	Origin
TcChr35-S	603092	605092	1	Origin
TcChr35-S	609955	611955	1	Origin
TcChr35-S	616011	618011	1	Origin
TcChr35-S	625323	627323	1	Origin
TcChr35-S	632967	634967	1	Origin
TcChr35-S	637557	639557	1	Origin
TcChr35-S	641988	644248	2	Origin
TcChr35-S	662754	667951	3	Origin
TcChr35-S	691478	694463	2	Origin
TcChr35-S	704274	706756	2	Origin
TcChr35-S	721454	728797	4	Origin
TcChr35-S	732685	734685	1	Origin
TcChr35-S	747318	749318	1	Origin
TcChr35-S	762102	764102	1	Origin
TcChr35-S	778265	781063	2	Origin
TcChr35-S	782243	784630	2	Origin
TcChr35-S	786822	791818	2	Origin
TcChr35-S	792823	794823	1	Origin
TcChr35-S	799452	801452	1	Origin
TcChr35-S	803485	805485	1	Origin
TcChr35-S	806859	808859	1	Origin
TcChr35-S	811184	813184	1	Origin
TcChr35-S	814769	817246	2	Origin
TcChr35-S	823313	825313	1	Origin
TcChr35-S	844128	847371	3	Origin
TcChr35-S	850466	852466	1	Origin
TcChr35-S	859467	861467	1	Origin
TcChr35-S	869037	871037	1	Origin
TcChr35-S	872696	875883	2	Origin
TcChr35-S	880730	883524	2	Origin
TcChr35-S	885628	887628	1	Origin
TcChr35-S	918420	922691	2	Origin
TcChr35-S	929935	931935	1	Origin
TcChr35-S	1112876	1114876	1	Origin
TcChr35-S	1118687	1120687	1	Origin
TcChr35-S	1129057	1131057	1	Origin
TcChr35-S	1134376	1136376	1	Origin
TcChr35-S	1140822	1142822	1	Origin
TcChr35-S	1158930	1160930	1	Origin
TcChr36-S	92027	94027	1	Origin
TcChr36-S	102199	106430	2	Origin
TcChr36-S	107934	109934	1	Origin
TcChr36-S	114048	116217	2	Origin
TcChr36-S	137016	139016	1	Origin
TcChr36-S	147207	151024	2	Origin
TcChr36-S	157028	163454	3	Origin
TcChr36-S	165794	167794	1	Origin
TcChr36-S	171700	173700	1	Origin
TcChr36-S	175760	178240	2	Origin
TcChr36-S	188742	190742	1	Origin
TcChr36-S	192874	194874	1	Origin
TcChr36-S	211814	213814	1	Origin
TcChr36-S	221972	226286	4	Origin
TcChr36-S	324796	326796	1	Origin
TcChr36-S	342067	344067	1	Origin
TcChr36-S	346080	352504	3	Origin
TcChr36-S	355083	357083	1	Origin
TcChr36-S	360574	362574	1	Origin
TcChr36-S	364388	366388	1	Origin
TcChr36-S	367883	370006	2	Origin
TcChr36-S	371735	376153	3	Origin
TcChr36-S	378199	380868	2	Origin
TcChr36-S	401484	406321	2	Origin
TcChr36-S	409952	415430	4	Origin
TcChr36-S	426442	428442	1	Origin
TcChr36-S	430571	434490	2	Origin
TcChr36-S	440198	442198	1	Origin
TcChr36-S	447711	451799	2	Origin
TcChr36-S	472620	474620	1	Origin
TcChr36-S	485904	489825	2	Origin
TcChr36-S	643169	645169	1	Origin
TcChr36-S	676727	683770	7	Origin
TcChr36-S	684782	687475	2	Origin
TcChr36-S	696211	698211	1	Origin
TcChr36-S	702517	709622	4	Origin
TcChr36-S	713245	715839	2	Origin
TcChr36-S	735305	737721	2	Origin
TcChr36-S	743177	745177	1	Origin
TcChr36-S	747273	749511	2	Origin
TcChr36-S	752301	762110	8	Origin
TcChr36-S	763568	765568	1	Origin
TcChr36-S	767848	769848	1	Origin
TcChr36-S	772684	780178	4	Origin
TcChr36-S	784525	786525	1	Origin
TcChr36-S	787972	795907	6	Origin
TcChr36-S	806500	810479	2	Origin
TcChr36-S	812559	816327	2	Origin
TcChr36-S	825885	827885	1	Origin
TcChr36-S	830954	836471	3	Origin
TcChr36-S	837772	840869	3	Origin
TcChr36-S	844700	846700	1	Origin
TcChr36-S	851031	858347	4	Origin
TcChr36-S	860552	862552	1	Origin
TcChr36-S	869572	872166	3	Origin
TcChr36-S	874918	879571	3	Origin
TcChr36-S	883886	885886	1	Origin
TcChr36-S	913402	915402	1	Origin
TcChr36-S	934133	940684	4	Origin
TcChr36-S	946386	948386	1	Origin
TcChr36-S	955555	957555	1	Origin
TcChr36-S	959622	966431	3	Origin
TcChr36-S	969647	975360	3	Origin
TcChr36-S	992300	994562	2	Origin
TcChr36-S	997532	999532	1	Origin
TcChr36-S	1008643	1010643	1	Origin
TcChr36-S	1014786	1017538	2	Origin
TcChr36-S	1018948	1022806	4	Origin
TcChr36-S	1081655	1086457	2	Origin
TcChr36-S	1088848	1090861	2	Origin
TcChr36-S	1104278	1110080	3	Origin
TcChr36-S	1112893	1114893	1	Origin
TcChr36-S	1130104	1136192	4	Origin
TcChr36-S	1152830	1154830	1	Origin
TcChr36-S	1163136	1166179	3	Origin
TcChr36-S	1173004	1175004	1	Origin
TcChr37-S	6183	17447	6	Origin
TcChr37-S	32917	37247	2	Origin
TcChr37-S	39909	44791	2	Origin
TcChr37-S	47649	49649	1	Origin
TcChr37-S	56626	58626	1	Origin
TcChr37-S	82003	84003	1	Origin
TcChr37-S	85187	88978	3	Origin
TcChr37-S	93836	95836	1	Origin
TcChr37-S	206594	209641	2	Origin
TcChr37-S	225202	227202	1	Origin
TcChr37-S	240436	242436	1	Origin
TcChr37-S	285953	290758	3	Origin
TcChr37-S	292449	294449	1	Origin
TcChr37-S	302753	305564	2	Origin
TcChr37-S	306665	308665	1	Origin
TcChr37-S	310455	312455	1	Origin
TcChr37-S	322301	328807	5	Origin
TcChr37-S	332923	334923	1	Origin
TcChr37-S	335943	347122	7	Origin
TcChr37-S	348994	356026	4	Origin
TcChr37-S	371636	376223	3	Origin
TcChr37-S	392997	394997	1	Origin
TcChr37-S	396836	398836	1	Origin
TcChr37-S	400908	402908	1	Origin
TcChr37-S	406263	411587	3	Origin
TcChr37-S	420778	425043	2	Origin
TcChr37-S	429805	432141	2	Origin
TcChr37-S	436498	438498	1	Origin
TcChr37-S	441459	446436	2	Origin
TcChr37-S	448737	453504	2	Origin
TcChr37-S	459648	463593	3	Origin
TcChr37-S	483364	491708	6	Origin
TcChr37-S	497635	502242	3	Origin
TcChr37-S	520394	524772	2	Origin
TcChr37-S	526491	528491	1	Origin
TcChr37-S	545313	547313	1	Origin
TcChr37-S	549038	551038	1	Origin
TcChr37-S	555529	564738	6	Origin
TcChr37-S	567589	577737	7	Origin
TcChr37-S	587093	589093	1	Origin
TcChr37-S	600770	602770	1	Origin
TcChr37-S	604350	606692	2	Origin
TcChr37-S	610754	612754	1	Origin
TcChr37-S	619623	621623	1	Origin
TcChr37-S	636036	639559	2	Origin
TcChr37-S	642242	644242	1	Origin
TcChr37-S	647323	656428	5	Origin
TcChr37-S	661663	663663	1	Origin
TcChr37-S	665595	669134	2	Origin
TcChr37-S	730273	732273	1	Origin
TcChr37-S	733875	736087	2	Origin
TcChr37-S	741267	743267	1	Origin
TcChr37-S	796080	798080	1	Origin
TcChr37-S	800581	802581	1	Origin
TcChr37-S	811557	813557	1	Origin
TcChr37-S	822185	828672	6	Origin
TcChr37-S	832333	840447	4	Origin
TcChr37-S	848997	854783	3	Origin
TcChr37-S	867223	870368	3	Origin
TcChr37-S	891871	893871	1	Origin
TcChr37-S	895549	897549	1	Origin
TcChr37-S	898946	900946	1	Origin
TcChr37-S	905809	909268	2	Origin
TcChr37-S	928884	931365	2	Origin
TcChr37-S	937923	939923	1	Origin
TcChr37-S	945143	947143	1	Origin
TcChr37-S	948936	950936	1	Origin
TcChr37-S	956766	958766	1	Origin
TcChr37-S	1055373	1061597	3	Origin
TcChr37-S	1062855	1064855	1	Origin
TcChr37-S	1083069	1087382	3	Origin
TcChr37-S	1098409	1101235	2	Origin
TcChr37-S	1109369	1114385	3	Origin
TcChr37-S	1120198	1122198	1	Origin
TcChr37-S	1124478	1126478	1	Origin
TcChr37-S	1141195	1143195	1	Origin
TcChr37-S	1148257	1152582	2	Origin
TcChr37-S	1156958	1161490	2	Origin
TcChr37-S	1178416	1180416	1	Origin
TcChr37-S	1189121	1191121	1	Origin
TcChr37-S	1193951	1195951	1	Origin
TcChr37-S	1290875	1292875	1	Origin
TcChr37-S	1297677	1302640	2	Origin
TcChr37-S	1303902	1306897	2	Origin
TcChr37-S	1315059	1322738	4	Origin
TcChr37-S	1339137	1341137	1	Origin
TcChr37-S	1346542	1348542	1	Origin
TcChr38-S	3234	5234	1	Origin
TcChr38-S	6512	8512	1	Origin
TcChr38-S	11302	15870	3	Origin
TcChr38-S	16919	23528	5	Origin
TcChr38-S	45047	47065	2	Origin
TcChr38-S	49516	51516	1	Origin
TcChr38-S	55744	59159	4	Origin
TcChr38-S	61300	71070	8	Origin
TcChr38-S	73508	75508	1	Origin
TcChr38-S	87548	89548	1	Origin
TcChr38-S	93322	97187	2	Origin
TcChr38-S	110766	112766	1	Origin
TcChr38-S	134899	137922	3	Origin
TcChr38-S	138923	144133	4	Origin
TcChr38-S	145631	147631	1	Origin
TcChr38-S	150100	152100	1	Origin
TcChr38-S	156134	162081	3	Origin
TcChr38-S	178291	180291	1	Origin
TcChr38-S	209216	213474	2	Origin
TcChr38-S	216789	218789	1	Origin
TcChr38-S	220394	222394	1	Origin
TcChr38-S	224296	226296	1	Origin
TcChr38-S	230417	235794	3	Origin
TcChr38-S	241853	243853	1	Origin
TcChr38-S	249872	251872	1	Origin
TcChr38-S	261777	263777	1	Origin
TcChr38-S	304828	306828	1	Origin
TcChr38-S	311832	313832	1	Origin
TcChr38-S	315646	317646	1	Origin
TcChr38-S	330135	332701	2	Origin
TcChr38-S	335276	337276	1	Origin
TcChr38-S	344401	349326	3	Origin
TcChr38-S	352936	354936	1	Origin
TcChr38-S	386643	388643	1	Origin
TcChr38-S	390280	392280	1	Origin
TcChr38-S	393454	395454	1	Origin
TcChr38-S	396757	398757	1	Origin
TcChr38-S	408244	410497	2	Origin
TcChr38-S	412309	414309	1	Origin
TcChr38-S	421984	423984	1	Origin
TcChr38-S	430554	432554	1	Origin
TcChr38-S	439130	447394	5	Origin
TcChr38-S	448433	450433	1	Origin
TcChr38-S	453984	455984	1	Origin
TcChr38-S	485422	487422	1	Origin
TcChr38-S	1060833	1062833	1	Origin
TcChr38-S	1067292	1070797	2	Origin
TcChr38-S	1073470	1075470	1	Origin
TcChr38-S	1084781	1089492	2	Origin
TcChr38-S	1092987	1095149	2	Origin
TcChr38-S	1097028	1100151	3	Origin
TcChr38-S	1101552	1108330	4	Origin
TcChr38-S	1125705	1129224	2	Origin
TcChr38-S	1135930	1139134	2	Origin
TcChr38-S	1146613	1148613	1	Origin
TcChr38-S	1152393	1154393	1	Origin
TcChr38-S	1155966	1162352	4	Origin
TcChr38-S	1164488	1167355	2	Origin
TcChr38-S	1170718	1172718	1	Origin
TcChr38-S	1176819	1182263	4	Origin
TcChr38-S	1187433	1194929	5	Origin
TcChr38-S	1209465	1211465	1	Origin
TcChr38-S	1217025	1222052	3	Origin
TcChr38-S	1226313	1232458	3	Origin
TcChr38-S	1266120	1268120	1	Origin
TcChr38-S	1273377	1279726	5	Origin
TcChr38-S	1299480	1307874	5	Origin
TcChr38-S	1309326	1314528	3	Origin
TcChr38-S	1319439	1322114	2	Origin
TcChr39-S	37832	39832	1	Origin
TcChr39-S	50272	52966	3	Origin
TcChr39-S	56631	60312	2	Origin
TcChr39-S	62470	64470	1	Origin
TcChr39-S	67414	74567	5	Origin
TcChr39-S	80689	82721	2	Origin
TcChr39-S	86783	90042	2	Origin
TcChr39-S	91046	93046	1	Origin
TcChr39-S	104200	106264	2	Origin
TcChr39-S	109710	114586	2	Origin
TcChr39-S	116953	118953	1	Origin
TcChr39-S	121305	124121	2	Origin
TcChr39-S	130206	133311	2	Origin
TcChr39-S	144324	146324	1	Origin
TcChr39-S	148071	150071	1	Origin
TcChr39-S	152554	161603	7	Origin
TcChr39-S	163029	165029	1	Origin
TcChr39-S	178304	182422	3	Origin
TcChr39-S	187371	191479	2	Origin
TcChr39-S	197680	199680	1	Origin
TcChr39-S	204831	209732	3	Origin
TcChr39-S	227159	229159	1	Origin
TcChr39-S	232431	235692	2	Origin
TcChr39-S	246166	252720	4	Origin
TcChr39-S	289564	291564	1	Origin
TcChr39-S	293997	295997	1	Origin
TcChr39-S	307933	312327	2	Origin
TcChr39-S	314366	316366	1	Origin
TcChr39-S	318578	320578	1	Origin
TcChr39-S	330174	332174	1	Origin
TcChr39-S	334915	336915	1	Origin
TcChr39-S	344503	347919	2	Origin
TcChr39-S	355556	357616	2	Origin
TcChr39-S	360318	365330	3	Origin
TcChr39-S	368917	372020	2	Origin
TcChr39-S	394870	400899	3	Origin
TcChr39-S	405709	407709	1	Origin
TcChr39-S	412460	416559	2	Origin
TcChr39-S	419453	421453	1	Origin
TcChr39-S	424478	426478	1	Origin
TcChr39-S	428198	431369	2	Origin
TcChr39-S	435126	437126	1	Origin
TcChr39-S	441737	443737	1	Origin
TcChr39-S	462823	464823	1	Origin
TcChr39-S	466431	468431	1	Origin
TcChr39-S	475218	477337	2	Origin
TcChr39-S	532749	539280	3	Origin
TcChr39-S	544156	550872	5	Origin
TcChr39-S	564862	567434	3	Origin
TcChr39-S	606153	609472	2	Origin
TcChr39-S	611445	615306	2	Origin
TcChr39-S	623451	625672	2	Origin
TcChr39-S	638873	640873	1	Origin
TcChr39-S	646071	650434	3	Origin
TcChr39-S	663543	667961	3	Origin
TcChr39-S	669133	675468	5	Origin
TcChr39-S	677108	679108	1	Origin
TcChr39-S	688164	690164	1	Origin
TcChr39-S	694743	696743	1	Origin
TcChr39-S	701572	704835	2	Origin
TcChr39-S	709055	711055	1	Origin
TcChr39-S	712731	717066	3	Origin
TcChr39-S	742861	744861	1	Origin
TcChr39-S	776169	778169	1	Origin
TcChr39-S	782622	784622	1	Origin
TcChr39-S	788709	790709	1	Origin
TcChr39-S	792139	796198	3	Origin
TcChr39-S	797498	799498	1	Origin
TcChr39-S	827672	829672	1	Origin
TcChr39-S	831527	838817	5	Origin
TcChr39-S	845852	847898	2	Origin
TcChr39-S	851515	854784	3	Origin
TcChr39-S	856820	858820	1	Origin
TcChr39-S	861895	863895	1	Origin
TcChr39-S	869710	876173	5	Origin
TcChr39-S	883532	885532	1	Origin
TcChr39-S	887320	890335	2	Origin
TcChr39-S	922379	924379	1	Origin
TcChr39-S	926651	928651	1	Origin
TcChr39-S	931198	933198	1	Origin
TcChr39-S	941630	943896	2	Origin
TcChr39-S	946850	948850	1	Origin
TcChr39-S	956738	958738	1	Origin
TcChr39-S	960449	962449	1	Origin
TcChr39-S	970430	972931	2	Origin
TcChr39-S	976667	978667	1	Origin
TcChr39-S	982151	984151	1	Origin
TcChr39-S	990908	993529	2	Origin
TcChr39-S	1004010	1008937	3	Origin
TcChr39-S	1016657	1024446	5	Origin
TcChr39-S	1054607	1056927	3	Origin
TcChr39-S	1065998	1068998	2	Origin
TcChr39-S	1083591	1089248	3	Origin
TcChr39-S	1094806	1100904	4	Origin
TcChr39-S	1102260	1106397	2	Origin
TcChr39-S	1111378	1113378	1	Origin
TcChr39-S	1115889	1119370	2	Origin
TcChr39-S	1122405	1124405	1	Origin
TcChr39-S	1125968	1127968	1	Origin
TcChr39-S	1137177	1139177	1	Origin
TcChr39-S	1145190	1148193	2	Origin
TcChr39-S	1150826	1152826	1	Origin
TcChr39-S	1167330	1169330	1	Origin
TcChr39-S	1174238	1176238	1	Origin
TcChr39-S	1181776	1186514	2	Origin
TcChr39-S	1315864	1317864	1	Origin
TcChr39-S	1319137	1327436	6	Origin
TcChr39-S	1343296	1345296	1	Origin
TcChr39-S	1347389	1349389	1	Origin
TcChr39-S	1351799	1353799	1	Origin
TcChr39-S	1360626	1367972	5	Origin
TcChr39-S	1369530	1372911	3	Origin
TcChr39-S	1374201	1376201	1	Origin
TcChr39-S	1380174	1382174	1	Origin
TcChr39-S	1383986	1385986	1	Origin
TcChr39-S	1391099	1395342	2	Origin
TcChr39-S	1404248	1406248	1	Origin
TcChr39-S	1415243	1417243	1	Origin
TcChr39-S	1418292	1421212	2	Origin
TcChr39-S	1431100	1433100	1	Origin
TcChr39-S	1435425	1438656	2	Origin
TcChr39-S	1440382	1445408	3	Origin
TcChr39-S	1449758	1451758	1	Origin
TcChr39-S	1459577	1461577	1	Origin
TcChr39-S	1469514	1471514	1	Origin
TcChr39-S	1521696	1525852	2	Origin
TcChr39-S	1569984	1575336	4	Origin
TcChr39-S	1586845	1598375	8	Origin
TcChr39-S	1608224	1618386	6	Origin
TcChr39-S	1625679	1627679	1	Origin
TcChr39-S	1645930	1647930	1	Origin
TcChr39-S	1649072	1656561	4	Origin
TcChr39-S	1660254	1662254	1	Origin
TcChr39-S	1666656	1668656	1	Origin
TcChr39-S	1679179	1689110	8	Origin
TcChr39-S	1692069	1698002	5	Origin
TcChr39-S	1702438	1704438	1	Origin
TcChr39-S	1706113	1709057	3	Origin
TcChr39-S	1712325	1718524	4	Origin
TcChr39-S	1724883	1727219	2	Origin
TcChr39-S	1730548	1736630	6	Origin
TcChr39-S	1741094	1745133	4	Origin
TcChr39-S	1755821	1757821	1	Origin
TcChr39-S	1781476	1783476	1	Origin
TcChr39-S	1787411	1789411	1	Origin
TcChr39-S	1793097	1796400	2	Origin
TcChr39-S	1800477	1802477	1	Origin
TcChr39-S	1805434	1808625	2	Origin
TcChr39-S	1811567	1813567	1	Origin
TcChr39-S	1817947	1821165	2	Origin
TcChr39-S	1824776	1826776	1	Origin
TcChr39-S	1831989	1833989	1	Origin
TcChr3-S	30317	35291	3	Origin
TcChr3-S	38439	40782	2	Origin
TcChr3-S	45920	48654	2	Origin
TcChr3-S	49731	57125	6	Origin
TcChr3-S	58729	60729	1	Origin
TcChr3-S	155034	166266	6	Origin
TcChr3-S	168407	179531	9	Origin
TcChr3-S	184941	186941	1	Origin
TcChr40-S	46974	48974	1	Origin
TcChr40-S	52490	57335	2	Origin
TcChr40-S	59037	61037	1	Origin
TcChr40-S	117199	121151	3	Origin
TcChr40-S	122200	126244	6	Origin
TcChr40-S	139288	141288	1	Origin
TcChr40-S	151646	153646	1	Origin
TcChr40-S	156670	158670	1	Origin
TcChr40-S	163201	167398	3	Origin
TcChr40-S	169259	172408	2	Origin
TcChr40-S	174356	176356	1	Origin
TcChr40-S	186855	188855	1	Origin
TcChr40-S	190108	193499	2	Origin
TcChr40-S	195208	197208	1	Origin
TcChr40-S	201943	203943	1	Origin
TcChr40-S	264700	270924	4	Origin
TcChr40-S	273331	278680	3	Origin
TcChr40-S	283071	286576	2	Origin
TcChr40-S	289095	291095	1	Origin
TcChr40-S	292096	299382	5	Origin
TcChr40-S	307282	309282	1	Origin
TcChr40-S	311184	314817	2	Origin
TcChr40-S	329516	331516	1	Origin
TcChr40-S	334197	336197	1	Origin
TcChr40-S	345580	353826	7	Origin
TcChr40-S	359756	361756	1	Origin
TcChr40-S	371540	373540	1	Origin
TcChr40-S	391468	396136	2	Origin
TcChr40-S	402666	407065	3	Origin
TcChr40-S	409896	411896	1	Origin
TcChr40-S	415240	417240	1	Origin
TcChr40-S	418484	420484	1	Origin
TcChr40-S	422606	425486	3	Origin
TcChr40-S	428301	430301	1	Origin
TcChr40-S	433552	437241	3	Origin
TcChr40-S	438940	440940	1	Origin
TcChr40-S	447865	454507	5	Origin
TcChr40-S	462087	465192	2	Origin
TcChr40-S	478333	482366	2	Origin
TcChr40-S	492551	496206	2	Origin
TcChr40-S	504719	510114	3	Origin
TcChr40-S	524587	527736	2	Origin
TcChr40-S	529205	531205	1	Origin
TcChr40-S	592706	594706	1	Origin
TcChr40-S	599351	601351	1	Origin
TcChr40-S	607556	611596	3	Origin
TcChr40-S	617185	619941	3	Origin
TcChr40-S	624078	626078	1	Origin
TcChr40-S	629743	633934	2	Origin
TcChr40-S	656299	662761	5	Origin
TcChr40-S	670172	676018	7	Origin
TcChr40-S	691503	693503	1	Origin
TcChr40-S	696023	698023	1	Origin
TcChr40-S	701261	708982	5	Origin
TcChr40-S	801465	803465	1	Origin
TcChr40-S	807736	809736	1	Origin
TcChr40-S	814078	816078	1	Origin
TcChr40-S	817596	822734	3	Origin
TcChr40-S	828944	830944	1	Origin
TcChr40-S	835923	837923	1	Origin
TcChr40-S	845879	850019	2	Origin
TcChr40-S	852512	854512	1	Origin
TcChr40-S	856970	859547	2	Origin
TcChr40-S	862666	864666	1	Origin
TcChr40-S	874247	876247	1	Origin
TcChr40-S	899215	901215	1	Origin
TcChr40-S	939515	941515	1	Origin
TcChr40-S	947631	949631	1	Origin
TcChr40-S	960807	962938	2	Origin
TcChr40-S	964001	968679	2	Origin
TcChr40-S	976031	981031	2	Origin
TcChr40-S	993235	998885	5	Origin
TcChr40-S	1001397	1005562	2	Origin
TcChr40-S	1008323	1012155	2	Origin
TcChr40-S	1028565	1030565	1	Origin
TcChr40-S	1033571	1035571	1	Origin
TcChr40-S	1043961	1050365	3	Origin
TcChr40-S	1051619	1053619	1	Origin
TcChr40-S	1058412	1060412	1	Origin
TcChr40-S	1065568	1067568	1	Origin
TcChr40-S	1072603	1074603	1	Origin
TcChr40-S	1075755	1077755	1	Origin
TcChr40-S	1080957	1082957	1	Origin
TcChr40-S	1100298	1104412	2	Origin
TcChr40-S	1116137	1118137	1	Origin
TcChr40-S	1173599	1180663	4	Origin
TcChr40-S	1182469	1184469	1	Origin
TcChr40-S	1187574	1189574	1	Origin
TcChr40-S	1192090	1194090	1	Origin
TcChr40-S	1195363	1197363	1	Origin
TcChr40-S	1212271	1218171	4	Origin
TcChr40-S	1219732	1221732	1	Origin
TcChr40-S	1234071	1239243	3	Origin
TcChr40-S	1243108	1245108	1	Origin
TcChr40-S	1258927	1263366	2	Origin
TcChr40-S	1279345	1284630	4	Origin
TcChr40-S	1285879	1297851	6	Origin
TcChr40-S	1299760	1304615	2	Origin
TcChr40-S	1309326	1313178	4	Origin
TcChr40-S	1348352	1350352	1	Origin
TcChr40-S	1355943	1362208	3	Origin
TcChr40-S	1366535	1370951	2	Origin
TcChr40-S	1376436	1378617	2	Origin
TcChr40-S	1397818	1399818	1	Origin
TcChr40-S	1402763	1404763	1	Origin
TcChr40-S	1407566	1412497	2	Origin
TcChr40-S	1425174	1427174	1	Origin
TcChr40-S	1433954	1437743	2	Origin
TcChr40-S	1441485	1443485	1	Origin
TcChr40-S	1464275	1467652	2	Origin
TcChr40-S	1468721	1470721	1	Origin
TcChr40-S	1474673	1476673	1	Origin
TcChr40-S	1481356	1483356	1	Origin
TcChr40-S	1485232	1487232	1	Origin
TcChr40-S	1492903	1494903	1	Origin
TcChr40-S	1508051	1510051	1	Origin
TcChr40-S	1534010	1537978	2	Origin
TcChr40-S	1542281	1544281	1	Origin
TcChr40-S	1549999	1554746	4	Origin
TcChr40-S	1568184	1570184	1	Origin
TcChr40-S	1572807	1574807	1	Origin
TcChr40-S	1588445	1591870	2	Origin
TcChr40-S	1598333	1600333	1	Origin
TcChr40-S	1602033	1604033	1	Origin
TcChr40-S	1614037	1616037	1	Origin
TcChr40-S	1622509	1624509	1	Origin
TcChr40-S	1626156	1628156	1	Origin
TcChr40-S	1632458	1634458	1	Origin
TcChr40-S	1655193	1659733	3	Origin
TcChr40-S	1661856	1663856	1	Origin
TcChr40-S	1690229	1692229	1	Origin
TcChr40-S	1694501	1697411	2	Origin
TcChr40-S	1703420	1705420	1	Origin
TcChr40-S	1715344	1717344	1	Origin
TcChr40-S	1737587	1742900	3	Origin
TcChr40-S	1744728	1747706	3	Origin
TcChr40-S	1748799	1750799	1	Origin
TcChr40-S	1757392	1760627	3	Origin
TcChr40-S	1802860	1807669	2	Origin
TcChr40-S	1870392	1872392	1	Origin
TcChr40-S	1880076	1882076	1	Origin
TcChr41-S	12719	14719	1	Origin
TcChr41-S	20804	22804	1	Origin
TcChr41-S	40041	42041	1	Origin
TcChr41-S	57156	67654	23	Origin
TcChr41-S	86636	89193	2	Origin
TcChr41-S	104881	110577	3	Origin
TcChr41-S	120008	123821	2	Origin
TcChr41-S	129304	131304	1	Origin
TcChr41-S	154447	156447	1	Origin
TcChr41-S	160993	165847	3	Origin
TcChr41-S	173092	175092	1	Origin
TcChr41-S	182433	184433	1	Origin
TcChr41-S	191980	196813	2	Origin
TcChr41-S	199952	204156	3	Origin
TcChr41-S	207136	209136	1	Origin
TcChr41-S	220440	230634	7	Origin
TcChr41-S	233078	235078	1	Origin
TcChr41-S	238284	240284	1	Origin
TcChr41-S	242296	244296	1	Origin
TcChr41-S	246000	248000	1	Origin
TcChr41-S	256969	261439	4	Origin
TcChr41-S	262539	268970	3	Origin
TcChr41-S	277039	279039	1	Origin
TcChr41-S	323749	331666	4	Origin
TcChr41-S	334717	336717	1	Origin
TcChr41-S	357766	359766	1	Origin
TcChr41-S	370804	372804	1	Origin
TcChr41-S	375867	377867	1	Origin
TcChr41-S	423565	426034	2	Origin
TcChr41-S	445471	447471	1	Origin
TcChr41-S	472949	475464	3	Origin
TcChr41-S	480567	483761	3	Origin
TcChr41-S	486041	488041	1	Origin
TcChr41-S	490095	492095	1	Origin
TcChr41-S	507103	509103	1	Origin
TcChr41-S	567098	569098	1	Origin
TcChr41-S	642642	644642	1	Origin
TcChr41-S	666302	668302	1	Origin
TcChr41-S	690956	692956	1	Origin
TcChr41-S	705571	707571	1	Origin
TcChr41-S	708906	710906	1	Origin
TcChr41-S	713035	715035	1	Origin
TcChr41-S	722051	724051	1	Origin
TcChr41-S	728177	731065	2	Origin
TcChr41-S	735109	737109	1	Origin
TcChr41-S	741266	743266	1	Origin
TcChr41-S	764344	766344	1	Origin
TcChr41-S	985323	987323	1	Origin
TcChr41-S	995307	997307	1	Origin
TcChr41-S	1007845	1009845	1	Origin
TcChr41-S	1027057	1031188	2	Origin
TcChr41-S	1034250	1036250	1	Origin
TcChr41-S	1049763	1052980	2	Origin
TcChr41-S	1088138	1090138	1	Origin
TcChr41-S	1104502	1107365	2	Origin
TcChr41-S	1148595	1153107	2	Origin
TcChr41-S	1166881	1169329	2	Origin
TcChr41-S	1186761	1188761	1	Origin
TcChr41-S	1198950	1200950	1	Origin
TcChr41-S	1207314	1211206	2	Origin
TcChr41-S	1233225	1235225	1	Origin
TcChr41-S	1240070	1242070	1	Origin
TcChr41-S	1245317	1247317	1	Origin
TcChr41-S	1251208	1253208	1	Origin
TcChr41-S	1268221	1270719	2	Origin
TcChr41-S	1271978	1274316	2	Origin
TcChr41-S	1305151	1314834	9	Origin
TcChr41-S	1316521	1318521	1	Origin
TcChr41-S	1321062	1323062	1	Origin
TcChr41-S	1337195	1339195	1	Origin
TcChr41-S	1356013	1358013	1	Origin
TcChr41-S	1359359	1361359	1	Origin
TcChr41-S	1373055	1375055	1	Origin
TcChr41-S	1378886	1380886	1	Origin
TcChr41-S	1397875	1399875	1	Origin
TcChr41-S	1401068	1403068	1	Origin
TcChr41-S	1418905	1420905	1	Origin
TcChr41-S	1423471	1425471	1	Origin
TcChr41-S	1428304	1433274	2	Origin
TcChr41-S	1450022	1452022	1	Origin
TcChr41-S	1455249	1457249	1	Origin
TcChr41-S	1462482	1464482	1	Origin
TcChr41-S	1465650	1468294	2	Origin
TcChr41-S	1475074	1477074	1	Origin
TcChr41-S	1484535	1486535	1	Origin
TcChr41-S	1492871	1494871	1	Origin
TcChr41-S	1500572	1502572	1	Origin
TcChr41-S	1504101	1506101	1	Origin
TcChr41-S	1521897	1523897	1	Origin
TcChr41-S	1527462	1529462	1	Origin
TcChr41-S	1534118	1536118	1	Origin
TcChr41-S	1542947	1544947	1	Origin
TcChr41-S	1570670	1572670	1	Origin
TcChr41-S	1606350	1611350	2	Origin
TcChr41-S	1621324	1623324	1	Origin
TcChr41-S	1628331	1630331	1	Origin
TcChr41-S	1649570	1651570	1	Origin
TcChr41-S	1674313	1680773	3	Origin
TcChr41-S	1688287	1690287	1	Origin
TcChr41-S	1692331	1694331	1	Origin
TcChr41-S	1698085	1700085	1	Origin
TcChr41-S	1701487	1703487	1	Origin
TcChr41-S	1716381	1719378	2	Origin
TcChr41-S	1723582	1725582	1	Origin
TcChr41-S	1740989	1742989	1	Origin
TcChr41-S	1755518	1761153	3	Origin
TcChr41-S	1765448	1768118	2	Origin
TcChr41-S	1770072	1772072	1	Origin
TcChr41-S	1774569	1776946	2	Origin
TcChr41-S	1797237	1799237	1	Origin
TcChr41-S	1802260	1807870	5	Origin
TcChr41-S	1810050	1812050	1	Origin
TcChr41-S	1844591	1846591	1	Origin
TcChr41-S	1870979	1873876	2	Origin
TcChr41-S	1886853	1888853	1	Origin
TcChr41-S	1891625	1896792	4	Origin
TcChr41-S	1899206	1902213	2	Origin
TcChr41-S	1911823	1913823	1	Origin
TcChr41-S	1923755	1928513	2	Origin
TcChr41-S	1930715	1932715	1	Origin
TcChr41-S	1944964	1946988	2	Origin
TcChr41-S	1952775	1954775	1	Origin
TcChr41-S	1965984	1973255	3	Origin
TcChr41-S	1976159	1978159	1	Origin
TcChr41-S	1990011	1992011	1	Origin
TcChr41-S	2009857	2011857	1	Origin
TcChr41-S	2029207	2033301	2	Origin
TcChr41-S	2049418	2051418	1	Origin
TcChr41-S	2055839	2057839	1	Origin
TcChr41-S	2060552	2062552	1	Origin
TcChr41-S	2076961	2078961	1	Origin
TcChr41-S	2098413	2100413	1	Origin
TcChr41-S	2115748	2117748	1	Origin
TcChr41-S	2126179	2130747	2	Origin
TcChr41-S	2136457	2138457	1	Origin
TcChr41-S	2146866	2148866	1	Origin
TcChr41-S	2182598	2184598	1	Origin
TcChr41-S	2186887	2190080	2	Origin
TcChr41-S	2192072	2194072	1	Origin
TcChr41-S	2203418	2205418	1	Origin
TcChr41-S	2207503	2210418	2	Origin
TcChr41-S	2217769	2226673	5	Origin
TcChr41-S	2227944	2229944	1	Origin
TcChr41-S	2238115	2242547	2	Origin
TcChr41-S	2247534	2249534	1	Origin
TcChr41-S	2252032	2255789	3	Origin
TcChr41-S	2257380	2259380	1	Origin
TcChr41-S	2262062	2264062	1	Origin
TcChr41-S	2265470	2267470	1	Origin
TcChr41-S	2276198	2278198	1	Origin
TcChr41-S	2289581	2291581	1	Origin
TcChr41-S	2305684	2307684	1	Origin
TcChr41-S	2342564	2344564	1	Origin
TcChr41-S	2352460	2354460	1	Origin
TcChr4-S	6782	8782	1	Origin
TcChr4-S	11804	16581	3	Origin
TcChr4-S	20955	22955	1	Origin
TcChr4-S	79036	92650	9	Origin
TcChr4-S	96173	98173	1	Origin
TcChr4-S	100850	102850	1	Origin
TcChr4-S	104706	106706	1	Origin
TcChr4-S	113001	117315	4	Origin
TcChr4-S	121319	123319	1	Origin
TcChr4-S	125641	131333	4	Origin
TcChr4-S	132343	134343	1	Origin
TcChr4-S	137792	144619	5	Origin
TcChr4-S	171972	173972	1	Origin
TcChr4-S	175509	177599	2	Origin
TcChr4-S	181763	183763	1	Origin
TcChr5-S	9641	11641	1	Origin
TcChr5-S	14778	16778	1	Origin
TcChr5-S	115114	120209	3	Origin
TcChr5-S	130847	134673	2	Origin
TcChr5-S	147683	149683	1	Origin
TcChr5-S	155157	157157	1	Origin
TcChr5-S	165042	167042	1	Origin
TcChr5-S	172229	180608	6	Origin
TcChr5-S	185085	187085	1	Origin
TcChr6-S	14324	17401	3	Origin
TcChr6-S	24177	26177	1	Origin
TcChr6-S	30785	34081	2	Origin
TcChr6-S	38109	40109	1	Origin
TcChr6-S	43156	45156	1	Origin
TcChr6-S	54103	56103	1	Origin
TcChr6-S	57593	62060	3	Origin
TcChr6-S	65241	67241	1	Origin
TcChr6-S	71235	77022	3	Origin
TcChr6-S	81148	83148	1	Origin
TcChr6-S	84630	86630	1	Origin
TcChr6-S	93992	97474	4	Origin
TcChr6-S	103350	105350	1	Origin
TcChr6-S	110686	113628	3	Origin
TcChr6-S	114996	122681	5	Origin
TcChr6-S	125608	128907	2	Origin
TcChr6-S	138379	140379	1	Origin
TcChr6-S	143900	157583	8	Origin
TcChr6-S	168582	170785	2	Origin
TcChr6-S	176022	182275	4	Origin
TcChr6-S	183436	186756	3	Origin
TcChr6-S	188904	190904	1	Origin
TcChr6-S	219530	221530	1	Origin
TcChr6-S	222619	226393	4	Origin
TcChr6-S	227781	232848	3	Origin
TcChr6-S	234820	240183	4	Origin
TcChr6-S	242395	244395	1	Origin
TcChr6-S	248740	256414	3	Origin
TcChr6-S	259472	262551	2	Origin
TcChr6-S	264583	266583	1	Origin
TcChr6-S	294967	301025	4	Origin
TcChr6-S	310368	312368	1	Origin
[truncated: 2,344 more rows]

## Sheet: Table-S3
ST3. dataset of origins , IZD , termination and TZD.
Chromosome	Start	End	class
TcChr10-S	161149	163149	origins
TcChr10-S	188270	190270	origins
TcChr10-S	199077	201077	origins
TcChr10-S	249620	251620	origins
TcChr10-S	267104	269104	origins
TcChr10-S	297053	299053	origins
TcChr10-S	337376	339376	origins
TcChr10-S	34204	36204	origins
TcChr10-S	384205	386205	origins
TcChr10-S	399078	401078	origins
TcChr10-S	414051	416051	origins
TcChr10-S	436474	438474	origins
TcChr10-S	456838	458838	origins
TcChr10-S	470644	472644	origins
TcChr11-S	137064	139064	origins
TcChr11-S	147088	149088	origins
TcChr11-S	152109	154109	origins
TcChr11-S	155296	157296	origins
TcChr11-S	160010	162010	origins
TcChr11-S	17925	19925	origins
TcChr11-S	192790	194790	origins
TcChr11-S	235532	237532	origins
TcChr11-S	268211	270211	origins
TcChr11-S	288024	290024	origins
TcChr11-S	300275	302275	origins
TcChr11-S	303307	305307	origins
TcChr11-S	308801	310801	origins
TcChr11-S	348874	350874	origins
TcChr11-S	405939	407939	origins
TcChr11-S	450459	452459	origins
TcChr11-S	472257	474257	origins
TcChr11-S	477448	479448	origins
TcChr11-S	485189	487189	origins
TcChr11-S	489143	491143	origins
TcChr11-S	498535	500535	origins
TcChr11-S	52024	54024	origins
TcChr12-S	102740	104740	origins
TcChr12-S	126834	128834	origins
TcChr12-S	185617	187617	origins
TcChr12-S	193303	195303	origins
TcChr12-S	216237	218237	origins
TcChr12-S	26749	28749	origins
TcChr12-S	268550	270550	origins
TcChr12-S	284874	286874	origins
TcChr12-S	313528	315528	origins
TcChr12-S	341725	343725	origins
TcChr12-S	349124	351124	origins
TcChr12-S	356198	358198	origins
TcChr12-S	359867	361867	origins
TcChr12-S	36751	38751	origins
TcChr12-S	370194	372194	origins
TcChr12-S	376927	378927	origins
TcChr12-S	384625	386625	origins
TcChr12-S	394845	396845	origins
TcChr12-S	407254	409254	origins
TcChr12-S	427863	429863	origins
TcChr12-S	433775	435775	origins
TcChr12-S	448662	450662	origins
TcChr12-S	48186	50186	origins
TcChr12-S	51926	53926	origins
TcChr12-S	7095	9095	origins
TcChr12-S	96225	98225	origins
TcChr13-S	156803	158803	origins
TcChr13-S	170799	172799	origins
TcChr13-S	188772	190772	origins
TcChr13-S	19048	21048	origins
TcChr13-S	192873	194873	origins
TcChr13-S	218391	220391	origins
TcChr13-S	23877	25877	origins
TcChr13-S	241189	243189	origins
TcChr13-S	250008	252008	origins
TcChr13-S	288948	290948	origins
TcChr13-S	292015	294015	origins
TcChr13-S	306051	308051	origins
TcChr13-S	328112	330112	origins
TcChr13-S	436454	438454	origins
TcChr13-S	455473	457473	origins
TcChr13-S	487977	489977	origins
TcChr13-S	500906	502906	origins
TcChr13-S	526895	528895	origins
TcChr13-S	543773	545773	origins
TcChr14-S	146714	148714	origins
TcChr14-S	282652	284652	origins
TcChr14-S	287718	289718	origins
TcChr14-S	291207	293207	origins
TcChr14-S	325622	327622	origins
TcChr14-S	329302	331302	origins
TcChr14-S	355352	357352	origins
TcChr14-S	359144	361144	origins
TcChr14-S	374396	376396	origins
TcChr14-S	403451	405451	origins
TcChr14-S	435887	437887	origins
TcChr14-S	441981	443981	origins
TcChr14-S	457425	459425	origins
TcChr14-S	465184	467184	origins
TcChr14-S	478835	480835	origins
TcChr14-S	499140	501140	origins
TcChr14-S	503105	505105	origins
TcChr14-S	507342	509342	origins
TcChr14-S	510565	512565	origins
TcChr14-S	531752	533752	origins
TcChr14-S	535611	537611	origins
TcChr14-S	543601	545601	origins
TcChr14-S	551668	553668	origins
TcChr14-S	566569	568569	origins
TcChr14-S	570874	572874	origins
TcChr14-S	67796	69796	origins
TcChr14-S	74661	76661	origins
TcChr14-S	88223	90223	origins
TcChr15-S	102664	104664	origins
TcChr15-S	110576	112576	origins
TcChr15-S	128870	130870	origins
TcChr15-S	142636	144636	origins
TcChr15-S	274392	276392	origins
TcChr15-S	294736	296736	origins
TcChr15-S	339908	341908	origins
TcChr15-S	34850	36850	origins
TcChr15-S	350289	352289	origins
TcChr15-S	353491	355491	origins
TcChr15-S	359628	361628	origins
TcChr15-S	367576	369576	origins
TcChr15-S	383616	385616	origins
TcChr15-S	44852	46852	origins
TcChr15-S	48045	50045	origins
TcChr15-S	94967	96967	origins
TcChr16-S	120218	122218	origins
TcChr16-S	163142	165142	origins
TcChr16-S	196846	198846	origins
TcChr16-S	200759	202759	origins
TcChr16-S	224272	226272	origins
TcChr16-S	231280	233280	origins
TcChr16-S	235950	237950	origins
TcChr16-S	25024	27024	origins
TcChr16-S	253850	255850	origins
TcChr16-S	257163	259163	origins
TcChr16-S	262452	264452	origins
TcChr16-S	296916	298916	origins
TcChr16-S	309186	311186	origins
TcChr16-S	312227	314227	origins
TcChr16-S	319616	321616	origins
TcChr16-S	324327	326327	origins
TcChr16-S	331199	333199	origins
TcChr16-S	36226	38226	origins
TcChr16-S	372251	374251	origins
TcChr16-S	422369	424369	origins
TcChr16-S	425609	427609	origins
TcChr16-S	436610	438610	origins
TcChr16-S	494514	496514	origins
TcChr16-S	510698	512698	origins
TcChr16-S	514964	516964	origins
TcChr16-S	518514	520514	origins
TcChr16-S	554438	556438	origins
TcChr16-S	576651	578651	origins
TcChr16-S	580012	582012	origins
TcChr16-S	588159	590159	origins
TcChr16-S	594818	596818	origins
TcChr16-S	602138	604138	origins
TcChr16-S	624103	626103	origins
TcChr17-S	13866	15866	origins
TcChr17-S	141224	143224	origins
TcChr17-S	166438	168438	origins
TcChr17-S	193317	195317	origins
TcChr17-S	210224	212224	origins
TcChr17-S	215612	217612	origins
TcChr17-S	220844	222844	origins
TcChr17-S	224731	226731	origins
TcChr17-S	229289	231289	origins
TcChr17-S	232759	234759	origins
TcChr17-S	253265	255265	origins
TcChr17-S	256401	258401	origins
TcChr17-S	264403	266403	origins
TcChr17-S	267989	269989	origins
TcChr17-S	271379	273379	origins
TcChr17-S	282287	284287	origins
TcChr17-S	297556	299556	origins
TcChr17-S	305451	307451	origins
TcChr17-S	325170	327170	origins
TcChr17-S	353007	355007	origins
TcChr17-S	402904	404904	origins
TcChr17-S	406237	408237	origins
TcChr17-S	429105	431105	origins
TcChr17-S	473957	475957	origins
TcChr17-S	478958	480958	origins
TcChr17-S	491047	493047	origins
TcChr17-S	574701	576701	origins
TcChr17-S	590012	592012	origins
TcChr17-S	595556	597556	origins
TcChr17-S	599184	601184	origins
TcChr17-S	609576	611576	origins
TcChr17-S	616407	618407	origins
TcChr17-S	629426	631426	origins
TcChr17-S	639615	641615	origins
TcChr18-S	128956	130956	origins
TcChr18-S	160910	162910	origins
TcChr18-S	190629	192629	origins
TcChr18-S	19325	21325	origins
TcChr18-S	193718	195718	origins
TcChr18-S	204129	206129	origins
TcChr18-S	213390	215390	origins
TcChr18-S	220543	222543	origins
TcChr18-S	230276	232276	origins
TcChr18-S	233896	235896	origins
TcChr18-S	262652	264652	origins
TcChr18-S	281470	283470	origins
TcChr18-S	287809	289809	origins
TcChr18-S	293090	295090	origins
TcChr18-S	322000	324000	origins
TcChr18-S	418538	420538	origins
TcChr18-S	453520	455520	origins
TcChr18-S	460513	462513	origins
TcChr18-S	517420	519420	origins
TcChr18-S	52821	54821	origins
TcChr18-S	540567	542567	origins
TcChr18-S	552326	554326	origins
TcChr18-S	559793	561793	origins
TcChr18-S	61340	63340	origins
TcChr18-S	69545	71545	origins
TcChr18-S	79984	81984	origins
TcChr19-S	110432	112432	origins
TcChr19-S	129759	131759	origins
TcChr19-S	153734	155734	origins
TcChr19-S	161663	163663	origins
TcChr19-S	186129	188129	origins
TcChr19-S	201496	203496	origins
TcChr19-S	205072	207072	origins
TcChr19-S	223972	225972	origins
TcChr19-S	235551	237551	origins
TcChr19-S	297691	299691	origins
TcChr19-S	301643	303643	origins
TcChr19-S	43633	45633	origins
TcChr19-S	485704	487704	origins
TcChr19-S	49456	51456	origins
TcChr19-S	498047	500047	origins
TcChr19-S	505016	507016	origins
TcChr19-S	54830	56830	origins
TcChr19-S	625860	627860	origins
TcChr19-S	645979	647979	origins
TcChr19-S	652673	654673	origins
TcChr1-S	11606	13606	origins
TcChr1-S	61654	63654	origins
TcChr20-S	100719	102719	origins
TcChr20-S	13776	15776	origins
TcChr20-S	168651	170651	origins
TcChr20-S	172412	174412	origins
TcChr20-S	178217	180217	origins
TcChr20-S	25613	27613	origins
TcChr20-S	322027	324027	origins
TcChr20-S	334116	336116	origins
TcChr20-S	350402	352402	origins
TcChr20-S	411370	413370	origins
TcChr20-S	415366	417366	origins
TcChr20-S	425804	427804	origins
TcChr20-S	469432	471432	origins
TcChr20-S	489205	491205	origins
TcChr20-S	509661	511661	origins
TcChr20-S	529256	531256	origins
TcChr20-S	534916	536916	origins
TcChr20-S	540503	542503	origins
TcChr20-S	551308	553308	origins
TcChr20-S	599369	601369	origins
TcChr20-S	60302	62302	origins
TcChr20-S	624810	626810	origins
TcChr21-S	111268	113268	origins
TcChr21-S	123422	125422	origins
TcChr21-S	170403	172403	origins
TcChr21-S	177398	179398	origins
TcChr21-S	196245	198245	origins
TcChr21-S	202293	204293	origins
TcChr21-S	270484	272484	origins
TcChr21-S	316636	318636	origins
TcChr21-S	323516	325516	origins
TcChr21-S	352239	354239	origins
TcChr21-S	358677	360677	origins
TcChr21-S	440027	442027	origins
TcChr21-S	449623	451623	origins
TcChr21-S	484918	486918	origins
TcChr21-S	502615	504615	origins
TcChr21-S	509197	511197	origins
TcChr21-S	531829	533829	origins
TcChr21-S	58457	60457	origins
TcChr21-S	614129	616129	origins
TcChr21-S	624380	626380	origins
TcChr21-S	637868	639868	origins
TcChr21-S	650488	652488	origins
TcChr21-S	667994	669994	origins
TcChr21-S	678334	680334	origins
TcChr22-S	115522	117522	origins
TcChr22-S	197828	199828	origins
TcChr22-S	215865	217865	origins
TcChr22-S	269907	271907	origins
TcChr22-S	298856	300856	origins
TcChr22-S	301938	303938	origins
TcChr22-S	319029	321029	origins
TcChr22-S	3386	5386	origins
TcChr22-S	341646	343646	origins
TcChr22-S	362634	364634	origins
TcChr22-S	366781	368781	origins
TcChr22-S	371524	373524	origins
TcChr22-S	501825	503825	origins
TcChr22-S	512603	514603	origins
TcChr22-S	517142	519142	origins
TcChr22-S	523367	525367	origins
TcChr22-S	560437	562437	origins
TcChr22-S	586386	588386	origins
TcChr22-S	649883	651883	origins
TcChr22-S	656857	658857	origins
TcChr23-S	108233	110233	origins
TcChr23-S	169307	171307	origins
TcChr23-S	248829	250829	origins
TcChr23-S	25461	27461	origins
TcChr23-S	287794	289794	origins
TcChr23-S	29070	31070	origins
TcChr23-S	312756	314756	origins
TcChr23-S	316788	318788	origins
TcChr23-S	344251	346251	origins
TcChr23-S	369420	371420	origins
TcChr23-S	41647	43647	origins
TcChr23-S	441893	443893	origins
TcChr23-S	446100	448100	origins
TcChr23-S	467192	469192	origins
TcChr23-S	473402	475402	origins
TcChr23-S	477816	479816	origins
TcChr23-S	48401	50401	origins
TcChr23-S	484837	486837	origins
TcChr23-S	584470	586470	origins
TcChr23-S	591951	593951	origins
TcChr23-S	615754	617754	origins
TcChr24-S	177291	179291	origins
TcChr24-S	194701	196701	origins
TcChr24-S	214530	216530	origins
TcChr24-S	256568	258568	origins
TcChr24-S	264727	266727	origins
TcChr24-S	269414	271414	origins
TcChr24-S	337232	339232	origins
TcChr24-S	351058	353058	origins
TcChr24-S	364810	366810	origins
TcChr24-S	387575	389575	origins
TcChr24-S	422984	424984	origins
TcChr24-S	435093	437093	origins
TcChr24-S	632757	634757	origins
TcChr24-S	650559	652559	origins
TcChr24-S	675221	677221	origins
TcChr24-S	680130	682130	origins
TcChr24-S	695834	697834	origins
TcChr24-S	698959	700959	origins
TcChr24-S	713815	715815	origins
TcChr24-S	719594	721594	origins
TcChr24-S	729138	731138	origins
TcChr24-S	738218	740218	origins
TcChr25-S	103538	105538	origins
TcChr25-S	135385	137385	origins
TcChr25-S	162984	164984	origins
TcChr25-S	197178	199178	origins
TcChr25-S	206423	208423	origins
TcChr25-S	217297	219297	origins
TcChr25-S	220544	222544	origins
TcChr25-S	240095	242095	origins
TcChr25-S	328512	330512	origins
TcChr25-S	346028	348028	origins
TcChr25-S	357056	359056	origins
TcChr25-S	405754	407754	origins
TcChr25-S	425088	427088	origins
TcChr25-S	463380	465380	origins
TcChr25-S	633903	635903	origins
TcChr25-S	648037	650037	origins
TcChr25-S	662026	664026	origins
TcChr25-S	70402	72402	origins
TcChr25-S	77792	79792	origins
TcChr25-S	94442	96442	origins
TcChr26-S	113835	115835	origins
TcChr26-S	169029	171029	origins
TcChr26-S	178516	180516	origins
TcChr26-S	213612	215612	origins
TcChr26-S	22088	24088	origins
TcChr26-S	223873	225873	origins
TcChr26-S	245869	247869	origins
TcChr26-S	253080	255080	origins
TcChr26-S	257297	259297	origins
TcChr26-S	334954	336954	origins
TcChr26-S	351599	353599	origins
TcChr26-S	369557	371557	origins
TcChr26-S	39651	41651	origins
TcChr26-S	424985	426985	origins
TcChr26-S	443729	445729	origins
TcChr26-S	461492	463492	origins
TcChr26-S	467551	469551	origins
TcChr26-S	472274	474274	origins
TcChr26-S	480263	482263	origins
TcChr26-S	484634	486634	origins
TcChr26-S	492373	494373	origins
TcChr26-S	497459	499459	origins
TcChr26-S	519048	521048	origins
TcChr26-S	522811	524811	origins
TcChr26-S	537488	539488	origins
TcChr26-S	578440	580440	origins
TcChr26-S	588984	590984	origins
TcChr26-S	615813	617813	origins
TcChr26-S	628555	630555	origins
TcChr26-S	731857	733857	origins
TcChr26-S	752457	754457	origins
TcChr26-S	760549	762549	origins
TcChr27-S	100688	102688	origins
TcChr27-S	105487	107487	origins
TcChr27-S	122952	124952	origins
TcChr27-S	144752	146752	origins
TcChr27-S	17542	19542	origins
TcChr27-S	185699	187699	origins
TcChr27-S	244120	246120	origins
TcChr27-S	24837	26837	origins
TcChr27-S	270675	272675	origins
TcChr27-S	308908	310908	origins
TcChr27-S	318675	320675	origins
TcChr27-S	333024	335024	origins
TcChr27-S	339595	341595	origins
TcChr27-S	352684	354684	origins
TcChr27-S	369231	371231	origins
TcChr27-S	37065	39065	origins
TcChr27-S	402175	404175	origins
TcChr27-S	406426	408426	origins
TcChr27-S	421207	423207	origins
TcChr27-S	443797	445797	origins
TcChr27-S	446905	448905	origins
TcChr27-S	460024	462024	origins
TcChr27-S	479127	481127	origins
TcChr27-S	49342	51342	origins
TcChr27-S	493846	495846	origins
TcChr27-S	497422	499422	origins
TcChr27-S	531351	533351	origins
TcChr27-S	542493	544493	origins
TcChr27-S	568067	570067	origins
TcChr27-S	651730	653730	origins
TcChr27-S	663302	665302	origins
TcChr27-S	680090	682090	origins
TcChr27-S	712943	714943	origins
TcChr27-S	716101	718101	origins
TcChr27-S	762368	764368	origins
TcChr27-S	771527	773527	origins
TcChr27-S	774672	776672	origins
TcChr27-S	77880	79880	origins
TcChr27-S	93604	95604	origins
TcChr28-S	157581	159581	origins
TcChr28-S	162463	164463	origins
TcChr28-S	166766	168766	origins
TcChr28-S	18509	20509	origins
TcChr28-S	220403	222403	origins
TcChr28-S	227656	229656	origins
TcChr28-S	24256	26256	origins
TcChr28-S	246559	248559	origins
TcChr28-S	294427	296427	origins
TcChr28-S	353879	355879	origins
TcChr28-S	359602	361602	origins
TcChr28-S	366732	368732	origins
TcChr28-S	370789	372789	origins
TcChr28-S	389391	391391	origins
TcChr28-S	400033	402033	origins
TcChr28-S	465008	467008	origins
TcChr28-S	468697	470697	origins
TcChr28-S	58253	60253	origins
TcChr28-S	618625	620625	origins
TcChr28-S	625969	627969	origins
TcChr28-S	650125	652125	origins
TcChr28-S	74458	76458	origins
TcChr28-S	97800	99800	origins
TcChr29-S	10921	12921	origins
TcChr29-S	35530	37530	origins
TcChr29-S	392126	394126	origins
TcChr29-S	444627	446627	origins
TcChr29-S	454507	456507	origins
TcChr29-S	487498	489498	origins
TcChr29-S	496503	498503	origins
TcChr29-S	49909	51909	origins
TcChr29-S	502380	504380	origins
TcChr29-S	510927	512927	origins
TcChr29-S	523583	525583	origins
TcChr29-S	527640	529640	origins
TcChr29-S	53119	55119	origins
TcChr29-S	58943	60943	origins
TcChr29-S	649764	651764	origins
TcChr29-S	690465	692465	origins
TcChr29-S	710226	712226	origins
TcChr29-S	749900	751900	origins
TcChr29-S	758044	760044	origins
TcChr29-S	762920	764920	origins
TcChr29-S	769344	771344	origins
TcChr29-S	776358	778358	origins
TcChr29-S	780133	782133	origins
TcChr29-S	784563	786563	origins
TcChr29-S	789602	791602	origins
TcChr29-S	808416	810416	origins
TcChr29-S	816422	818422	origins
TcChr29-S	823190	825190	origins
TcChr29-S	826686	828686	origins
TcChr29-S	840167	842167	origins
TcChr29-S	843852	845852	origins
TcChr2-S	114471	116471	origins
TcChr2-S	12124	14124	origins
TcChr2-S	123611	125611	origins
TcChr2-S	144097	146097	origins
TcChr2-S	45962	47962	origins
TcChr30-S	169991	171991	origins
TcChr30-S	182815	184815	origins
TcChr30-S	188077	190077	origins
TcChr30-S	196647	198647	origins
TcChr30-S	204286	206286	origins
TcChr30-S	261542	263542	origins
TcChr30-S	265210	267210	origins
TcChr30-S	320366	322366	origins
TcChr30-S	33598	35598	origins
TcChr30-S	343929	345929	origins
TcChr30-S	493095	495095	origins
TcChr30-S	497492	499492	origins
TcChr30-S	523363	525363	origins
TcChr30-S	542971	544971	origins
TcChr30-S	548331	550331	origins
TcChr30-S	581573	583573	origins
TcChr30-S	601149	603149	origins
TcChr30-S	617172	619172	origins
TcChr30-S	669496	671496	origins
TcChr30-S	697151	699151	origins
TcChr30-S	735891	737891	origins
TcChr30-S	738971	740971	origins
TcChr30-S	745041	747041	origins
TcChr30-S	762583	764583	origins
TcChr30-S	792235	794235	origins
TcChr30-S	88974	90974	origins
TcChr30-S	92257	94257	origins
TcChr31-S	140973	142973	origins
TcChr31-S	150436	152436	origins
TcChr31-S	156733	158733	origins
TcChr31-S	183480	185480	origins
TcChr31-S	187959	189959	origins
TcChr31-S	193237	195237	origins
TcChr31-S	213470	215470	origins
TcChr31-S	232581	234581	origins
TcChr31-S	397713	399713	origins
TcChr31-S	458381	460381	origins
TcChr31-S	462274	464274	origins
TcChr31-S	466312	468312	origins
TcChr31-S	48062	50062	origins
TcChr31-S	574169	576169	origins
TcChr31-S	579125	581125	origins
TcChr31-S	602169	604169	origins
TcChr31-S	637984	639984	origins
TcChr31-S	652130	654130	origins
TcChr31-S	711448	713448	origins
TcChr31-S	806924	808924	origins
TcChr31-S	878271	880271	origins
TcChr31-S	898065	900065	origins
TcChr31-S	911871	913871	origins
TcChr31-S	918928	920928	origins
TcChr32-S	107634	109634	origins
TcChr32-S	114106	116106	origins
TcChr32-S	118752	120752	origins
TcChr32-S	133849	135849	origins
TcChr32-S	287307	289307	origins
TcChr32-S	320987	322987	origins
TcChr32-S	347277	349277	origins
TcChr32-S	352454	354454	origins
TcChr32-S	381058	383058	origins
TcChr32-S	386598	388598	origins
TcChr32-S	424235	426235	origins
TcChr32-S	440247	442247	origins
TcChr32-S	451426	453426	origins
TcChr32-S	456501	458501	origins
TcChr32-S	468844	470844	origins
TcChr32-S	494201	496201	origins
TcChr32-S	497440	499440	origins
TcChr32-S	528822	530822	origins
TcChr32-S	549014	551014	origins
TcChr32-S	557246	559246	origins
TcChr32-S	642747	644747	origins
TcChr32-S	648884	650884	origins
TcChr32-S	667491	669491	origins
TcChr32-S	745073	747073	origins
TcChr32-S	772667	774667	origins
TcChr32-S	885040	887040	origins
TcChr32-S	892807	894807	origins
TcChr32-S	914252	916252	origins
TcChr32-S	918894	920894	origins
TcChr32-S	944718	946718	origins
TcChr33-S	1003862	1005862	origins
TcChr33-S	1009563	1011563	origins
TcChr33-S	1016497	1018497	origins
TcChr33-S	1031391	1033391	origins
TcChr33-S	137006	139006	origins
TcChr33-S	194793	196793	origins
TcChr33-S	232589	234589	origins
TcChr33-S	258329	260329	origins
TcChr33-S	497598	499598	origins
TcChr33-S	511328	513328	origins
TcChr33-S	51252	53252	origins
TcChr33-S	528592	530592	origins
TcChr33-S	553914	555914	origins
TcChr33-S	591823	593823	origins
TcChr33-S	63171	65171	origins
TcChr33-S	658700	660700	origins
TcChr33-S	681375	683375	origins
TcChr33-S	72806	74806	origins
TcChr33-S	735235	737235	origins
TcChr33-S	808295	810295	origins
TcChr33-S	811774	813774	origins
TcChr33-S	822824	824824	origins
TcChr33-S	833474	835474	origins
TcChr33-S	837182	839182	origins
TcChr33-S	85904	87904	origins
TcChr33-S	925284	927284	origins
TcChr33-S	936987	938987	origins
TcChr33-S	941459	943459	origins
TcChr34-S	1028568	1030568	origins
TcChr34-S	1050384	1052384	origins
TcChr34-S	256002	258002	origins
TcChr34-S	264912	266912	origins
TcChr34-S	285507	287507	origins
TcChr34-S	294287	296287	origins
TcChr34-S	331807	333807	origins
TcChr34-S	418711	420711	origins
TcChr34-S	434497	436497	origins
TcChr34-S	44787	46787	origins
TcChr34-S	474096	476096	origins
TcChr34-S	504605	506605	origins
TcChr34-S	515491	517491	origins
TcChr34-S	523925	525925	origins
TcChr34-S	55365	57365	origins
TcChr34-S	65953	67953	origins
TcChr34-S	686762	688762	origins
TcChr34-S	699411	701411	origins
TcChr34-S	70399	72399	origins
TcChr34-S	712679	714679	origins
TcChr34-S	718695	720695	origins
TcChr34-S	722489	724489	origins
TcChr34-S	761325	763325	origins
TcChr34-S	765568	767568	origins
TcChr34-S	81654	83654	origins
TcChr34-S	828645	830645	origins
TcChr34-S	845131	847131	origins
TcChr34-S	855662	857662	origins
TcChr34-S	873973	875973	origins
TcChr34-S	879953	881953	origins
TcChr34-S	931724	933724	origins
TcChr34-S	936451	938451	origins
TcChr34-S	948795	950795	origins
TcChr35-S	105458	107458	origins
TcChr35-S	111115	113115	origins
TcChr35-S	1112876	1114876	origins
TcChr35-S	1118687	1120687	origins
TcChr35-S	1129057	1131057	origins
TcChr35-S	1134376	1136376	origins
TcChr35-S	1140822	1142822	origins
TcChr35-S	1158930	1160930	origins
TcChr35-S	152428	154428	origins
TcChr35-S	192908	194908	origins
TcChr35-S	236486	238486	origins
TcChr35-S	273055	275055	origins
TcChr35-S	283325	285325	origins
TcChr35-S	311690	313690	origins
TcChr35-S	329148	331148	origins
TcChr35-S	335233	337233	origins
TcChr35-S	351246	353246	origins
TcChr35-S	364512	366512	origins
TcChr35-S	368483	370483	origins
TcChr35-S	375294	377294	origins
TcChr35-S	379506	381506	origins
TcChr35-S	395299	397299	origins
TcChr35-S	414903	416903	origins
TcChr35-S	419017	421017	origins
TcChr35-S	463360	465360	origins
TcChr35-S	476736	478736	origins
TcChr35-S	504554	506554	origins
TcChr35-S	603092	605092	origins
TcChr35-S	609955	611955	origins
TcChr35-S	616011	618011	origins
TcChr35-S	625323	627323	origins
TcChr35-S	632967	634967	origins
TcChr35-S	637557	639557	origins
TcChr35-S	732685	734685	origins
TcChr35-S	747318	749318	origins
TcChr35-S	762102	764102	origins
TcChr35-S	792823	794823	origins
TcChr35-S	799452	801452	origins
TcChr35-S	803485	805485	origins
TcChr35-S	806859	808859	origins
TcChr35-S	811184	813184	origins
TcChr35-S	823313	825313	origins
TcChr35-S	850466	852466	origins
TcChr35-S	859467	861467	origins
TcChr35-S	869037	871037	origins
TcChr35-S	885628	887628	origins
TcChr35-S	88749	90749	origins
TcChr35-S	91933	93933	origins
TcChr35-S	929935	931935	origins
TcChr36-S	1008643	1010643	origins
TcChr36-S	107934	109934	origins
TcChr36-S	1112893	1114893	origins
TcChr36-S	1152830	1154830	origins
TcChr36-S	1173004	1175004	origins
TcChr36-S	137016	139016	origins
TcChr36-S	165794	167794	origins
TcChr36-S	171700	173700	origins
TcChr36-S	188742	190742	origins
TcChr36-S	192874	194874	origins
TcChr36-S	211814	213814	origins
TcChr36-S	324796	326796	origins
TcChr36-S	342067	344067	origins
TcChr36-S	355083	357083	origins
TcChr36-S	360574	362574	origins
TcChr36-S	364388	366388	origins
TcChr36-S	426442	428442	origins
TcChr36-S	440198	442198	origins
TcChr36-S	472620	474620	origins
TcChr36-S	643169	645169	origins
TcChr36-S	696211	698211	origins
TcChr36-S	743177	745177	origins
TcChr36-S	763568	765568	origins
TcChr36-S	767848	769848	origins
TcChr36-S	784525	786525	origins
TcChr36-S	825885	827885	origins
TcChr36-S	844700	846700	origins
TcChr36-S	860552	862552	origins
TcChr36-S	883886	885886	origins
TcChr36-S	913402	915402	origins
TcChr36-S	92027	94027	origins
TcChr36-S	946386	948386	origins
TcChr36-S	955555	957555	origins
TcChr36-S	997532	999532	origins
TcChr37-S	1062855	1064855	origins
TcChr37-S	1120198	1122198	origins
TcChr37-S	1124478	1126478	origins
TcChr37-S	1141195	1143195	origins
TcChr37-S	1178416	1180416	origins
TcChr37-S	1189121	1191121	origins
TcChr37-S	1193951	1195951	origins
TcChr37-S	1290875	1292875	origins
TcChr37-S	1339137	1341137	origins
TcChr37-S	1346542	1348542	origins
TcChr37-S	225202	227202	origins
TcChr37-S	240436	242436	origins
TcChr37-S	292449	294449	origins
TcChr37-S	306665	308665	origins
TcChr37-S	310455	312455	origins
TcChr37-S	332923	334923	origins
TcChr37-S	392997	394997	origins
TcChr37-S	396836	398836	origins
TcChr37-S	400908	402908	origins
TcChr37-S	436498	438498	origins
TcChr37-S	47649	49649	origins
TcChr37-S	526491	528491	origins
TcChr37-S	545313	547313	origins
TcChr37-S	549038	551038	origins
TcChr37-S	56626	58626	origins
TcChr37-S	587093	589093	origins
TcChr37-S	600770	602770	origins
TcChr37-S	610754	612754	origins
TcChr37-S	619623	621623	origins
TcChr37-S	642242	644242	origins
TcChr37-S	661663	663663	origins
TcChr37-S	730273	732273	origins
TcChr37-S	741267	743267	origins
TcChr37-S	796080	798080	origins
TcChr37-S	800581	802581	origins
TcChr37-S	811557	813557	origins
TcChr37-S	82003	84003	origins
TcChr37-S	891871	893871	origins
TcChr37-S	895549	897549	origins
TcChr37-S	898946	900946	origins
TcChr37-S	937923	939923	origins
TcChr37-S	93836	95836	origins
TcChr37-S	945143	947143	origins
TcChr37-S	948936	950936	origins
TcChr37-S	956766	958766	origins
TcChr38-S	1060833	1062833	origins
TcChr38-S	1073470	1075470	origins
TcChr38-S	110766	112766	origins
TcChr38-S	1146613	1148613	origins
TcChr38-S	1152393	1154393	origins
TcChr38-S	1170718	1172718	origins
TcChr38-S	1209465	1211465	origins
TcChr38-S	1266120	1268120	origins
TcChr38-S	145631	147631	origins
TcChr38-S	150100	152100	origins
TcChr38-S	178291	180291	origins
TcChr38-S	216789	218789	origins
TcChr38-S	220394	222394	origins
TcChr38-S	224296	226296	origins
TcChr38-S	241853	243853	origins
TcChr38-S	249872	251872	origins
TcChr38-S	261777	263777	origins
TcChr38-S	304828	306828	origins
TcChr38-S	311832	313832	origins
TcChr38-S	315646	317646	origins
TcChr38-S	3234	5234	origins
TcChr38-S	335276	337276	origins
TcChr38-S	352936	354936	origins
TcChr38-S	386643	388643	origins
TcChr38-S	390280	392280	origins
TcChr38-S	393454	395454	origins
TcChr38-S	396757	398757	origins
TcChr38-S	412309	414309	origins
TcChr38-S	421984	423984	origins
TcChr38-S	430554	432554	origins
TcChr38-S	448433	450433	origins
TcChr38-S	453984	455984	origins
TcChr38-S	485422	487422	origins
TcChr38-S	49516	51516	origins
TcChr38-S	6512	8512	origins
TcChr38-S	73508	75508	origins
TcChr38-S	87548	89548	origins
TcChr39-S	1111378	1113378	origins
TcChr39-S	1122405	1124405	origins
TcChr39-S	1125968	1127968	origins
TcChr39-S	1137177	1139177	origins
TcChr39-S	1150826	1152826	origins
TcChr39-S	1167330	1169330	origins
TcChr39-S	116953	118953	origins
TcChr39-S	1174238	1176238	origins
TcChr39-S	1315864	1317864	origins
TcChr39-S	1343296	1345296	origins
TcChr39-S	1347389	1349389	origins
TcChr39-S	1351799	1353799	origins
TcChr39-S	1374201	1376201	origins
TcChr39-S	1380174	1382174	origins
TcChr39-S	1383986	1385986	origins
TcChr39-S	1404248	1406248	origins
TcChr39-S	1415243	1417243	origins
TcChr39-S	1431100	1433100	origins
TcChr39-S	144324	146324	origins
TcChr39-S	1449758	1451758	origins
TcChr39-S	1459577	1461577	origins
TcChr39-S	1469514	1471514	origins
TcChr39-S	148071	150071	origins
TcChr39-S	1625679	1627679	origins
TcChr39-S	163029	165029	origins
TcChr39-S	1645930	1647930	origins
TcChr39-S	1660254	1662254	origins
TcChr39-S	1666656	1668656	origins
TcChr39-S	1702438	1704438	origins
TcChr39-S	1755821	1757821	origins
TcChr39-S	1781476	1783476	origins
TcChr39-S	1787411	1789411	origins
TcChr39-S	1800477	1802477	origins
TcChr39-S	1811567	1813567	origins
TcChr39-S	1824776	1826776	origins
TcChr39-S	1831989	1833989	origins
TcChr39-S	197680	199680	origins
TcChr39-S	227159	229159	origins
TcChr39-S	289564	291564	origins
TcChr39-S	293997	295997	origins
TcChr39-S	314366	316366	origins
TcChr39-S	318578	320578	origins
TcChr39-S	330174	332174	origins
TcChr39-S	334915	336915	origins
TcChr39-S	37832	39832	origins
TcChr39-S	405709	407709	origins
TcChr39-S	419453	421453	origins
TcChr39-S	424478	426478	origins
TcChr39-S	435126	437126	origins
TcChr39-S	441737	443737	origins
TcChr39-S	462823	464823	origins
TcChr39-S	466431	468431	origins
TcChr39-S	62470	64470	origins
TcChr39-S	638873	640873	origins
TcChr39-S	677108	679108	origins
TcChr39-S	688164	690164	origins
TcChr39-S	694743	696743	origins
TcChr39-S	709055	711055	origins
TcChr39-S	742861	744861	origins
TcChr39-S	776169	778169	origins
TcChr39-S	782622	784622	origins
TcChr39-S	788709	790709	origins
TcChr39-S	797498	799498	origins
TcChr39-S	827672	829672	origins
TcChr39-S	856820	858820	origins
TcChr39-S	861895	863895	origins
TcChr39-S	883532	885532	origins
TcChr39-S	91046	93046	origins
TcChr39-S	922379	924379	origins
TcChr39-S	926651	928651	origins
TcChr39-S	931198	933198	origins
TcChr39-S	946850	948850	origins
TcChr39-S	956738	958738	origins
TcChr39-S	960449	962449	origins
TcChr39-S	976667	978667	origins
TcChr39-S	982151	984151	origins
TcChr3-S	184941	186941	origins
TcChr3-S	58729	60729	origins
TcChr40-S	1028565	1030565	origins
TcChr40-S	1033571	1035571	origins
TcChr40-S	1051619	1053619	origins
TcChr40-S	1058412	1060412	origins
TcChr40-S	1065568	1067568	origins
TcChr40-S	1072603	1074603	origins
TcChr40-S	1075755	1077755	origins
TcChr40-S	1080957	1082957	origins
TcChr40-S	1116137	1118137	origins
TcChr40-S	1182469	1184469	origins
TcChr40-S	1187574	1189574	origins
TcChr40-S	1192090	1194090	origins
TcChr40-S	1195363	1197363	origins
TcChr40-S	1219732	1221732	origins
TcChr40-S	1243108	1245108	origins
TcChr40-S	1348352	1350352	origins
TcChr40-S	139288	141288	origins
TcChr40-S	1397818	1399818	origins
TcChr40-S	1402763	1404763	origins
TcChr40-S	1425174	1427174	origins
TcChr40-S	1441485	1443485	origins
TcChr40-S	1468721	1470721	origins
TcChr40-S	1474673	1476673	origins
TcChr40-S	1481356	1483356	origins
TcChr40-S	1485232	1487232	origins
TcChr40-S	1492903	1494903	origins
TcChr40-S	1508051	1510051	origins
TcChr40-S	151646	153646	origins
TcChr40-S	1542281	1544281	origins
TcChr40-S	156670	158670	origins
TcChr40-S	1568184	1570184	origins
TcChr40-S	1572807	1574807	origins
TcChr40-S	1598333	1600333	origins
TcChr40-S	1602033	1604033	origins
TcChr40-S	1614037	1616037	origins
TcChr40-S	1622509	1624509	origins
TcChr40-S	1626156	1628156	origins
TcChr40-S	1632458	1634458	origins
TcChr40-S	1661856	1663856	origins
TcChr40-S	1690229	1692229	origins
TcChr40-S	1703420	1705420	origins
TcChr40-S	1715344	1717344	origins
TcChr40-S	174356	176356	origins
TcChr40-S	1748799	1750799	origins
TcChr40-S	186855	188855	origins
TcChr40-S	1870392	1872392	origins
TcChr40-S	1880076	1882076	origins
TcChr40-S	195208	197208	origins
TcChr40-S	201943	203943	origins
TcChr40-S	289095	291095	origins
TcChr40-S	307282	309282	origins
TcChr40-S	329516	331516	origins
TcChr40-S	334197	336197	origins
TcChr40-S	359756	361756	origins
TcChr40-S	371540	373540	origins
TcChr40-S	409896	411896	origins
TcChr40-S	415240	417240	origins
TcChr40-S	418484	420484	origins
TcChr40-S	428301	430301	origins
TcChr40-S	438940	440940	origins
TcChr40-S	46974	48974	origins
TcChr40-S	529205	531205	origins
TcChr40-S	59037	61037	origins
TcChr40-S	592706	594706	origins
TcChr40-S	599351	601351	origins
TcChr40-S	624078	626078	origins
TcChr40-S	691503	693503	origins
TcChr40-S	696023	698023	origins
TcChr40-S	801465	803465	origins
TcChr40-S	807736	809736	origins
TcChr40-S	814078	816078	origins
TcChr40-S	828944	830944	origins
TcChr40-S	835923	837923	origins
TcChr40-S	852512	854512	origins
TcChr40-S	862666	864666	origins
TcChr40-S	874247	876247	origins
TcChr40-S	899215	901215	origins
TcChr40-S	939515	941515	origins
TcChr40-S	947631	949631	origins
TcChr41-S	1007845	1009845	origins
TcChr41-S	1034250	1036250	origins
TcChr41-S	1088138	1090138	origins
TcChr41-S	1186761	1188761	origins
TcChr41-S	1198950	1200950	origins
TcChr41-S	1233225	1235225	origins
TcChr41-S	1240070	1242070	origins
TcChr41-S	1245317	1247317	origins
TcChr41-S	1251208	1253208	origins
TcChr41-S	12719	14719	origins
TcChr41-S	129304	131304	origins
TcChr41-S	1316521	1318521	origins
TcChr41-S	1321062	1323062	origins
TcChr41-S	1337195	1339195	origins
TcChr41-S	1356013	1358013	origins
TcChr41-S	1359359	1361359	origins
TcChr41-S	1373055	1375055	origins
TcChr41-S	1378886	1380886	origins
TcChr41-S	1397875	1399875	origins
TcChr41-S	1401068	1403068	origins
TcChr41-S	1418905	1420905	origins
TcChr41-S	1423471	1425471	origins
TcChr41-S	1450022	1452022	origins
TcChr41-S	1455249	1457249	origins
TcChr41-S	1462482	1464482	origins
TcChr41-S	1475074	1477074	origins
TcChr41-S	1484535	1486535	origins
TcChr41-S	1492871	1494871	origins
TcChr41-S	1500572	1502572	origins
TcChr41-S	1504101	1506101	origins
TcChr41-S	1521897	1523897	origins
TcChr41-S	1527462	1529462	origins
TcChr41-S	1534118	1536118	origins
TcChr41-S	1542947	1544947	origins
TcChr41-S	154447	156447	origins
TcChr41-S	1570670	1572670	origins
TcChr41-S	1621324	1623324	origins
TcChr41-S	1628331	1630331	origins
TcChr41-S	1649570	1651570	origins
TcChr41-S	1688287	1690287	origins
TcChr41-S	1692331	1694331	origins
TcChr41-S	1698085	1700085	origins
TcChr41-S	1701487	1703487	origins
TcChr41-S	1723582	1725582	origins
TcChr41-S	173092	175092	origins
TcChr41-S	1740989	1742989	origins
TcChr41-S	1770072	1772072	origins
TcChr41-S	1797237	1799237	origins
TcChr41-S	1810050	1812050	origins
TcChr41-S	182433	184433	origins
TcChr41-S	1844591	1846591	origins
TcChr41-S	1886853	1888853	origins
TcChr41-S	1911823	1913823	origins
TcChr41-S	1930715	1932715	origins
TcChr41-S	1952775	1954775	origins
TcChr41-S	1976159	1978159	origins
TcChr41-S	1990011	1992011	origins
TcChr41-S	2009857	2011857	origins
TcChr41-S	2049418	2051418	origins
TcChr41-S	2055839	2057839	origins
TcChr41-S	2060552	2062552	origins
TcChr41-S	207136	209136	origins
TcChr41-S	2076961	2078961	origins
TcChr41-S	20804	22804	origins
TcChr41-S	2098413	2100413	origins
TcChr41-S	2115748	2117748	origins
TcChr41-S	2136457	2138457	origins
TcChr41-S	2146866	2148866	origins
TcChr41-S	2182598	2184598	origins
TcChr41-S	2192072	2194072	origins
TcChr41-S	2203418	2205418	origins
TcChr41-S	2227944	2229944	origins
TcChr41-S	2247534	2249534	origins
TcChr41-S	2257380	2259380	origins
TcChr41-S	2262062	2264062	origins
TcChr41-S	2265470	2267470	origins
TcChr41-S	2276198	2278198	origins
TcChr41-S	2289581	2291581	origins
TcChr41-S	2305684	2307684	origins
TcChr41-S	233078	235078	origins
TcChr41-S	2342564	2344564	origins
TcChr41-S	2352460	2354460	origins
TcChr41-S	238284	240284	origins
TcChr41-S	242296	244296	origins
TcChr41-S	246000	248000	origins
TcChr41-S	277039	279039	origins
TcChr41-S	334717	336717	origins
TcChr41-S	357766	359766	origins
TcChr41-S	370804	372804	origins
TcChr41-S	375867	377867	origins
TcChr41-S	40041	42041	origins
TcChr41-S	445471	447471	origins
TcChr41-S	486041	488041	origins
TcChr41-S	490095	492095	origins
TcChr41-S	507103	509103	origins
TcChr41-S	567098	569098	origins
TcChr41-S	642642	644642	origins
TcChr41-S	666302	668302	origins
TcChr41-S	690956	692956	origins
TcChr41-S	705571	707571	origins
TcChr41-S	708906	710906	origins
TcChr41-S	713035	715035	origins
TcChr41-S	722051	724051	origins
TcChr41-S	735109	737109	origins
TcChr41-S	741266	743266	origins
TcChr41-S	764344	766344	origins
TcChr41-S	985323	987323	origins
TcChr41-S	995307	997307	origins
TcChr4-S	100850	102850	origins
TcChr4-S	104706	106706	origins
TcChr4-S	121319	123319	origins
TcChr4-S	132343	134343	origins
TcChr4-S	171972	173972	origins
TcChr4-S	181763	183763	origins
TcChr4-S	20955	22955	origins
TcChr4-S	6782	8782	origins
TcChr4-S	96173	98173	origins
TcChr5-S	147683	149683	origins
TcChr5-S	14778	16778	origins
TcChr5-S	155157	157157	origins
TcChr5-S	165042	167042	origins
TcChr5-S	185085	187085	origins
TcChr5-S	9641	11641	origins
TcChr6-S	103350	105350	origins
TcChr6-S	138379	140379	origins
TcChr6-S	188904	190904	origins
TcChr6-S	219530	221530	origins
TcChr6-S	24177	26177	origins
TcChr6-S	242395	244395	origins
TcChr6-S	264583	266583	origins
TcChr6-S	310368	312368	origins
TcChr6-S	356688	358688	origins
TcChr6-S	38109	40109	origins
TcChr6-S	43156	45156	origins
TcChr6-S	54103	56103	origins
TcChr6-S	65241	67241	origins
TcChr6-S	81148	83148	origins
TcChr6-S	84630	86630	origins
TcChr7-S	109009	111009	origins
TcChr7-S	132914	134914	origins
TcChr7-S	163659	165659	origins
TcChr7-S	173267	175267	origins
TcChr7-S	187213	189213	origins
TcChr7-S	191478	193478	origins
TcChr7-S	198641	200641	origins
TcChr7-S	209958	211958	origins
TcChr7-S	23272	25272	origins
TcChr7-S	297634	299634	origins
TcChr7-S	325927	327927	origins
TcChr7-S	335241	337241	origins
TcChr7-S	34506	36506	origins
TcChr8-S	113670	115670	origins
TcChr8-S	138452	140452	origins
TcChr8-S	185248	187248	origins
TcChr8-S	233391	235391	origins
TcChr8-S	275909	277909	origins
TcChr8-S	43961	45961	origins
TcChr9-S	107314	109314	origins
TcChr9-S	155930	157930	origins
TcChr9-S	186215	188215	origins
TcChr9-S	208405	210405	origins
TcChr9-S	249329	251329	origins
TcChr9-S	268556	270556	origins
TcChr9-S	32432	34432	origins
TcChr9-S	338496	340496	origins
TcChr9-S	344367	346367	origins
TcChr9-S	462699	464699	origins
TcChr9-S	471651	473651	origins
TcChr9-S	474941	476941	origins
TcChr9-S	494179	496179	origins
TcChr9-S	498811	500811	origins
TcChr9-S	87651	89651	origins
TcChr10-S	106143	108143	origins
TcChr10-S	192952	194952	origins
TcChr10-S	291529	293529	origins
TcChr10-S	57179	59179	origins
TcChr11-S	177001	179001	origins
TcChr11-S	187331	189331	origins
TcChr11-S	226530	228530	origins
TcChr11-S	343087	345087	origins
TcChr11-S	353233	355233	origins
TcChr11-S	46845	48845	origins
TcChr12-S	241338	243338	origins
TcChr12-S	249816	251816	origins
TcChr12-S	297103	299103	origins
TcChr12-S	316686	318686	origins
TcChr12-S	400917	402917	origins
TcChr12-S	422793	424793	origins
TcChr13-S	13356	15356	origins
TcChr13-S	151231	153231	origins
TcChr13-S	165174	167174	origins
TcChr13-S	213485	215485	origins
TcChr13-S	232501	234501	origins
TcChr13-S	332169	334169	origins
TcChr13-S	366641	368641	origins
TcChr13-S	466484	468484	origins
TcChr13-S	473000	475000	origins
TcChr13-S	509435	511435	origins
TcChr13-S	535884	537884	origins
TcChr14-S	151292	153292	origins
TcChr14-S	183545	185545	origins
TcChr14-S	314222	316222	origins
TcChr14-S	385402	387402	origins
TcChr14-S	408433	410433	origins
TcChr14-S	451745	453745	origins
TcChr15-S	25132	27132	origins
TcChr15-S	306147	308147	origins
TcChr15-S	371801	373801	origins
TcChr15-S	376578	378578	origins
TcChr15-S	60603	62603	origins
TcChr15-S	65985	67985	origins
TcChr15-S	79937	81937	origins
TcChr16-S	176776	178776	origins
TcChr16-S	182050	184050	origins
TcChr16-S	186870	188870	origins
TcChr16-S	219155	221155	origins
TcChr16-S	270924	272924	origins
TcChr16-S	381532	383532	origins
TcChr16-S	386310	388310	origins
TcChr16-S	444567	446567	origins
TcChr16-S	499813	501813	origins
TcChr16-S	541586	543586	origins
TcChr17-S	153854	155854	origins
TcChr17-S	160460	162460	origins
TcChr17-S	172661	174661	origins
TcChr17-S	329162	331162	origins
TcChr17-S	334077	336077	origins
TcChr17-S	416090	418090	origins
TcChr17-S	448577	450577	origins
TcChr17-S	459153	461153	origins
TcChr17-S	500438	502438	origins
TcChr17-S	536833	538833	origins
TcChr17-S	586284	588284	origins
TcChr17-S	603802	605802	origins
TcChr18-S	177486	179486	origins
TcChr18-S	225215	227215	origins
TcChr18-S	28906	30906	origins
TcChr18-S	326420	328420	origins
TcChr18-S	34569	36569	origins
TcChr18-S	351680	353680	origins
TcChr18-S	424125	426125	origins
TcChr18-S	495175	497175	origins
TcChr18-S	534151	536151	origins
TcChr18-S	631593	633593	origins
TcChr18-S	97494	99494	origins
TcChr19-S	104224	106224	origins
TcChr19-S	262157	264157	origins
TcChr19-S	272376	274376	origins
TcChr19-S	305343	307343	origins
TcChr19-S	559364	561364	origins
TcChr19-S	90579	92579	origins
TcChr19-S	95618	97618	origins
TcChr20-S	141574	143574	origins
TcChr20-S	151948	153948	origins
TcChr20-S	158717	160717	origins
TcChr20-S	19979	21979	origins
TcChr20-S	284470	286470	origins
TcChr20-S	31797	33797	origins
TcChr20-S	318640	320640	origins
TcChr20-S	355229	357229	origins
TcChr20-S	436445	438445	origins
TcChr20-S	481919	483919	origins
TcChr20-S	50453	52453	origins
TcChr21-S	163961	165961	origins
TcChr21-S	183569	185569	origins
TcChr21-S	378728	380728	origins
TcChr21-S	402822	404822	origins
TcChr21-S	427599	429599	origins
TcChr21-S	44155	46155	origins
TcChr21-S	478685	480685	origins
TcChr21-S	513093	515093	origins
TcChr22-S	186722	188722	origins
TcChr22-S	282559	284559	origins
TcChr22-S	382381	384381	origins
TcChr22-S	478813	480813	origins
TcChr22-S	538830	540830	origins
TcChr22-S	547467	549467	origins
TcChr22-S	595397	597397	origins
TcChr22-S	620840	622840	origins
TcChr22-S	629021	631021	origins
TcChr22-S	688582	690582	origins
TcChr23-S	101354	103354	origins
TcChr23-S	163848	165848	origins
TcChr23-S	230936	232936	origins
TcChr23-S	294341	296341	origins
TcChr23-S	298961	300961	origins
TcChr23-S	329940	331940	origins
TcChr23-S	377771	379771	origins
TcChr23-S	382552	384552	origins
TcChr23-S	407814	409814	origins
TcChr23-S	481285	483285	origins
TcChr23-S	82133	84133	origins
TcChr24-S	204059	206059	origins
TcChr24-S	209739	211739	origins
TcChr24-S	246692	248692	origins
TcChr24-S	297213	299213	origins
TcChr24-S	404503	406503	origins
TcChr24-S	413802	415802	origins
TcChr24-S	59272	61272	origins
TcChr24-S	626946	628946	origins
TcChr24-S	66823	68823	origins
TcChr24-S	670308	672308	origins
TcChr24-S	754029	756029	origins
TcChr24-S	769258	771258	origins
TcChr25-S	125034	127034	origins
TcChr25-S	202435	204435	origins
TcChr25-S	224136	226136	origins
TcChr25-S	235863	237863	origins
TcChr25-S	267878	269878	origins
TcChr25-S	318873	320873	origins
TcChr25-S	332163	334163	origins
TcChr25-S	337515	339515	origins
TcChr25-S	450372	452372	origins
TcChr25-S	613761	615761	origins
TcChr25-S	627838	629838	origins
TcChr25-S	640690	642690	origins
TcChr26-S	155681	157681	origins
TcChr26-S	165423	167423	origins
TcChr26-S	17494	19494	origins
TcChr26-S	232300	234300	origins
TcChr26-S	262415	264415	origins
TcChr26-S	283992	285992	origins
TcChr26-S	382006	384006	origins
TcChr26-S	450501	452501	origins
TcChr26-S	476362	478362	origins
TcChr26-S	533499	535499	origins
TcChr26-S	676397	678397	origins
TcChr26-S	718834	720834	origins
TcChr26-S	723700	725700	origins
TcChr26-S	74266	76266	origins
TcChr26-S	744367	746367	origins
TcChr26-S	87188	89188	origins
TcChr27-S	166761	168761	origins
TcChr27-S	190174	192174	origins
TcChr27-S	261098	263098	origins
TcChr27-S	365609	367609	origins
TcChr27-S	44640	46640	origins
TcChr27-S	55339	57339	origins
TcChr27-S	576240	578240	origins
TcChr27-S	602264	604264	origins
TcChr27-S	647701	649701	origins
TcChr27-S	658940	660940	origins
TcChr27-S	702773	704773	origins
TcChr27-S	756510	758510	origins
TcChr28-S	206871	208871	origins
TcChr28-S	571131	573131	origins
TcChr28-S	65206	67206	origins
TcChr28-S	657821	659821	origins
TcChr28-S	81292	83292	origins
TcChr29-S	475020	477020	origins
TcChr29-S	519833	521833	origins
TcChr29-S	575439	577439	origins
TcChr29-S	581073	583073	origins
TcChr29-S	679218	681218	origins
TcChr29-S	738027	740027	origins
TcChr29-S	754526	756526	origins
TcChr29-S	772569	774569	origins
TcChr29-S	79897	81897	origins
TcChr29-S	831400	833400	origins
TcChr2-S	132319	134319	origins
TcChr2-S	3027	5027	origins
TcChr2-S	77140	79140	origins
TcChr30-S	102365	104365	origins
TcChr30-S	157590	159590	origins
TcChr30-S	270085	272085	origins
TcChr30-S	331692	333692	origins
TcChr30-S	366046	368046	origins
TcChr30-S	481052	483052	origins
TcChr30-S	611233	613233	origins
TcChr30-S	704992	706992	origins
TcChr30-S	713423	715423	origins
TcChr30-S	729807	731807	origins
TcChr30-S	755532	757532	origins
TcChr30-S	788407	790407	origins
TcChr30-S	804995	806995	origins
TcChr31-S	145899	147899	origins
TcChr31-S	295303	297303	origins
TcChr31-S	350776	352776	origins
TcChr31-S	454530	456530	origins
TcChr31-S	560223	562223	origins
TcChr31-S	584195	586195	origins
TcChr31-S	589031	591031	origins
TcChr31-S	628213	630213	origins
TcChr31-S	633221	635221	origins
TcChr31-S	645307	647307	origins
TcChr31-S	719608	721608	origins
TcChr31-S	743166	745166	origins
TcChr32-S	312012	314012	origins
TcChr32-S	336063	338063	origins
TcChr32-S	340093	342093	origins
TcChr32-S	501122	503122	origins
TcChr32-S	535756	537756	origins
TcChr32-S	622680	624680	origins
TcChr32-S	734744	736744	origins
TcChr32-S	816429	818429	origins
TcChr32-S	827405	829405	origins
TcChr32-S	832914	834914	origins
TcChr32-S	838985	840985	origins
TcChr32-S	935342	937342	origins
TcChr33-S	110924	112924	origins
TcChr33-S	164756	166756	origins
TcChr33-S	182990	184990	origins
TcChr33-S	217975	219975	origins
TcChr33-S	266824	268824	origins
TcChr33-S	277396	279396	origins
TcChr33-S	506931	508931	origins
TcChr33-S	537690	539690	origins
TcChr33-S	543922	545922	origins
TcChr33-S	562035	564035	origins
TcChr33-S	58043	60043	origins
TcChr33-S	685306	687306	origins
TcChr33-S	848665	850665	origins
TcChr33-S	946791	948791	origins
TcChr34-S	11991	13991	origins
TcChr34-S	23132	25132	origins
TcChr34-S	414795	416795	origins
TcChr34-S	429343	431343	origins
TcChr34-S	479031	481031	origins
TcChr34-S	498521	500521	origins
TcChr34-S	683162	685162	origins
TcChr34-S	726374	728374	origins
TcChr34-S	76872	78872	origins
TcChr34-S	886557	888557	origins
TcChr34-S	944182	946182	origins
TcChr34-S	990039	992039	origins
TcChr35-S	156490	158490	origins
TcChr35-S	185948	187948	origins
TcChr35-S	199044	201044	origins
TcChr35-S	232274	234274	origins
TcChr35-S	371862	373862	origins
TcChr35-S	513223	515223	origins
TcChr35-S	539122	541122	origins
TcChr35-S	642118	644118	origins
TcChr35-S	691970	693970	origins
TcChr35-S	704515	706515	origins
TcChr35-S	778664	780664	origins
TcChr35-S	782436	784436	origins
TcChr35-S	788320	790320	origins
TcChr35-S	815007	817007	origins
TcChr35-S	873289	875289	origins
TcChr35-S	881127	883127	origins
TcChr35-S	919555	921555	origins
TcChr36-S	1015162	1017162	origins
TcChr36-S	103314	105314	origins
TcChr36-S	1083056	1085056	origins
TcChr36-S	1088854	1090854	origins
TcChr36-S	114132	116132	origins
TcChr36-S	148115	150115	origins
TcChr36-S	176000	178000	origins
TcChr36-S	367944	369944	origins
TcChr36-S	378533	380533	origins
TcChr36-S	402902	404902	origins
TcChr36-S	431530	433530	origins
TcChr36-S	448755	450755	origins
TcChr36-S	486864	488864	origins
TcChr36-S	685128	687128	origins
TcChr36-S	713542	715542	origins
TcChr36-S	735513	737513	origins
TcChr36-S	747392	749392	origins
TcChr36-S	807489	809489	origins
TcChr36-S	813443	815443	origins
TcChr36-S	992431	994431	origins
TcChr37-S	1098822	1100822	origins
TcChr37-S	1149419	1151419	origins
TcChr37-S	1158224	1160224	origins
TcChr37-S	1299158	1301158	origins
TcChr37-S	1304399	1306399	origins
TcChr37-S	207117	209117	origins
TcChr37-S	303158	305158	origins
TcChr37-S	34082	36082	origins
TcChr37-S	41350	43350	origins
TcChr37-S	421910	423910	origins
TcChr37-S	429973	431973	origins
TcChr37-S	442947	444947	origins
TcChr37-S	450120	452120	origins
TcChr37-S	521583	523583	origins
TcChr37-S	604521	606521	origins
TcChr37-S	636797	638797	origins
TcChr37-S	666364	668364	origins
TcChr37-S	733981	735981	origins
TcChr37-S	906538	908538	origins
TcChr37-S	929124	931124	origins
TcChr38-S	1068044	1070044	origins
TcChr38-S	1086136	1088136	origins
TcChr38-S	1093068	1095068	origins
TcChr38-S	1126464	1128464	origins
TcChr38-S	1136532	1138532	origins
TcChr38-S	1164921	1166921	origins
TcChr38-S	1319776	1321776	origins
TcChr38-S	210345	212345	origins
TcChr38-S	330418	332418	origins
TcChr38-S	408370	410370	origins
TcChr38-S	45056	47056	origins
TcChr38-S	94254	96254	origins
TcChr39-S	104232	106232	origins
TcChr39-S	1066498	1068498	origins
TcChr39-S	111148	113148	origins
TcChr39-S	1103328	1105328	origins
TcChr39-S	1116629	1118629	origins
TcChr39-S	1145691	1147691	origins
TcChr39-S	1183145	1185145	origins
TcChr39-S	121713	123713	origins
TcChr39-S	130758	132758	origins
TcChr39-S	1392220	1394220	origins
TcChr39-S	1418752	1420752	origins
TcChr39-S	1436040	1438040	origins
TcChr39-S	1522774	1524774	origins
TcChr39-S	1725051	1727051	origins
TcChr39-S	1793748	1795748	origins
TcChr39-S	1806029	1808029	origins
TcChr39-S	1818556	1820556	origins
TcChr39-S	188425	190425	origins
TcChr39-S	233061	235061	origins
TcChr39-S	309130	311130	origins
TcChr39-S	345211	347211	origins
TcChr39-S	355586	357586	origins
TcChr39-S	369468	371468	origins
TcChr39-S	413509	415509	origins
TcChr39-S	428783	430783	origins
TcChr39-S	475277	477277	origins
TcChr39-S	57471	59471	origins
TcChr39-S	606812	608812	origins
TcChr39-S	612375	614375	origins
TcChr39-S	623561	625561	origins
TcChr39-S	702203	704203	origins
TcChr39-S	80705	82705	origins
TcChr39-S	845875	847875	origins
TcChr39-S	87412	89412	origins
TcChr39-S	887827	889827	origins
TcChr39-S	941763	943763	origins
TcChr39-S	970680	972680	origins
TcChr39-S	991218	993218	origins
TcChr3-S	38610	40610	origins
TcChr3-S	46287	48287	origins
TcChr40-S	1002479	1004479	origins
TcChr40-S	1009239	1011239	origins
TcChr40-S	1101355	1103355	origins
TcChr40-S	1260146	1262146	origins
TcChr40-S	1301187	1303187	origins
TcChr40-S	1367743	1369743	origins
TcChr40-S	1376526	1378526	origins
TcChr40-S	1409031	1411031	origins
TcChr40-S	1434848	1436848	origins
TcChr40-S	1464963	1466963	origins
TcChr40-S	1534994	1536994	origins
TcChr40-S	1589157	1591157	origins
TcChr40-S	169833	171833	origins
TcChr40-S	1694956	1696956	origins
TcChr40-S	1804264	1806264	origins
TcChr40-S	190803	192803	origins
TcChr40-S	283823	285823	origins
TcChr40-S	312000	314000	origins
TcChr40-S	392802	394802	origins
TcChr40-S	462639	464639	origins
TcChr40-S	479349	481349	origins
TcChr40-S	493378	495378	origins
TcChr40-S	525161	527161	origins
TcChr40-S	53912	55912	origins
TcChr40-S	630838	632838	origins
TcChr40-S	846949	848949	origins
TcChr40-S	857258	859258	origins
TcChr40-S	960872	962872	origins
TcChr40-S	965340	967340	origins
TcChr40-S	977531	979531	origins
TcChr41-S	1028122	1030122	origins
TcChr41-S	1050371	1052371	origins
TcChr41-S	1104933	1106933	origins
TcChr41-S	1149851	1151851	origins
TcChr41-S	1167105	1169105	origins
TcChr41-S	120914	122914	origins
TcChr41-S	1208260	1210260	origins
TcChr41-S	1268470	1270470	origins
TcChr41-S	1272147	1274147	origins
TcChr41-S	1429789	1431789	origins
TcChr41-S	1465972	1467972	origins
TcChr41-S	1607850	1609850	origins
TcChr41-S	1716879	1718879	origins
TcChr41-S	1765783	1767783	origins
TcChr41-S	1774757	1776757	origins
TcChr41-S	1871427	1873427	origins
TcChr41-S	1899709	1901709	origins
TcChr41-S	193396	195396	origins
TcChr41-S	1925134	1927134	origins
TcChr41-S	1944976	1946976	origins
TcChr41-S	2030254	2032254	origins
TcChr41-S	2127463	2129463	origins
TcChr41-S	2187483	2189483	origins
TcChr41-S	2207960	2209960	origins
TcChr41-S	2239331	2241331	origins
TcChr41-S	423799	425799	origins
TcChr41-S	728621	730621	origins
TcChr41-S	86914	88914	origins
TcChr4-S	175554	177554	origins
TcChr5-S	131760	133760	origins
TcChr6-S	126257	128257	origins
TcChr6-S	168683	170683	origins
TcChr6-S	260011	262011	origins
TcChr6-S	31433	33433	origins
TcChr6-S	334333	336333	origins
TcChr7-S	140277	142277	origins
TcChr7-S	178246	180246	origins
TcChr8-S	192726	194726	origins
TcChr8-S	241317	243317	origins
TcChr8-S	27236	29236	origins
TcChr8-S	308566	310566	origins
TcChr9-S	228505	230505	origins
TcChr9-S	303217	305217	origins
TcChr9-S	307653	309653	origins
TcChr9-S	333815	335815	origins
TcChr9-S	466365	468365	origins
TcChr9-S	53931	55931	origins
TcChr10-S	279415	281415	origins
TcChr10-S	284769	286769	origins
TcChr10-S	422044	424044	origins
TcChr11-S	167330	169330	origins
TcChr11-S	435140	437140	origins
TcChr11-S	442706	444706	origins
TcChr11-S	455237	457237	origins
TcChr12-S	17293	19293	origins
TcChr12-S	278406	280406	origins
TcChr12-S	305013	307013	origins
TcChr13-S	204896	206896	origins
TcChr13-S	27499	29499	origins
TcChr13-S	280225	282225	origins
TcChr13-S	341788	343788	origins
TcChr13-S	430852	432852	origins
TcChr13-S	460483	462483	origins
TcChr13-S	495908	497908	origins
TcChr14-S	135918	137918	origins
TcChr14-S	157735	159735	origins
TcChr14-S	262718	264718	origins
TcChr14-S	274909	276909	origins
TcChr14-S	297095	299095	origins
TcChr14-S	307986	309986	origins
TcChr14-S	397720	399720	origins
TcChr14-S	420239	422239	origins
TcChr14-S	485313	487313	origins
TcChr15-S	345040	347040	origins
TcChr15-S	389127	391127	origins
TcChr16-S	204797	206797	origins
TcChr16-S	303304	305304	origins
TcChr17-S	512873	514873	origins
TcChr17-S	565358	567358	origins
TcChr18-S	122923	124923	origins
TcChr18-S	156336	158336	origins
TcChr18-S	255101	257101	origins
TcChr19-S	191974	193974	origins
TcChr19-S	245959	247959	origins
TcChr1-S	40498	42498	origins
TcChr20-S	246662	248662	origins
TcChr20-S	271127	273127	origins
TcChr21-S	157750	159750	origins
TcChr21-S	384371	386371	origins
TcChr21-S	434338	436338	origins
TcChr21-S	495927	497927	origins
TcChr22-S	122182	124182	origins
TcChr22-S	262756	264756	origins
TcChr22-S	335378	337378	origins
TcChr22-S	610589	612589	origins
TcChr22-S	640083	642083	origins
TcChr23-S	112591	114591	origins
TcChr23-S	142467	144467	origins
TcChr23-S	283076	285076	origins
TcChr23-S	335958	337958	origins
TcChr23-S	455174	457174	origins
TcChr23-S	519505	521505	origins
TcChr24-S	302163	304163	origins
TcChr25-S	115059	117059	origins
TcChr25-S	184299	186299	origins
TcChr25-S	191787	193787	origins
TcChr25-S	228996	230996	origins
TcChr25-S	622687	624687	origins
TcChr25-S	83375	85375	origins
TcChr26-S	147747	149747	origins
TcChr26-S	504520	506520	origins
TcChr26-S	526963	528963	origins
TcChr26-S	775551	777551	origins
TcChr26-S	81137	83137	origins
TcChr27-S	150955	152955	origins
TcChr27-S	198024	200024	origins
TcChr27-S	296320	298320	origins
TcChr27-S	31279	33279	origins
TcChr27-S	347754	349754	origins
TcChr27-S	360341	362341	origins
TcChr27-S	425410	427410	origins
TcChr27-S	466056	468056	origins
TcChr27-S	62120	64120	origins
TcChr27-S	71081	73081	origins
TcChr28-S	265470	267470	origins
TcChr28-S	640129	642129	origins
TcChr29-S	413630	415630	origins
TcChr29-S	439274	441274	origins
TcChr30-S	663986	665986	origins
TcChr30-S	782409	784409	origins
TcChr31-S	356019	358019	origins
TcChr31-S	595372	597372	origins
TcChr31-S	750108	752108	origins
TcChr32-S	124601	126601	origins
TcChr32-S	356629	358629	origins
TcChr32-S	487788	489788	origins
TcChr32-S	799349	801349	origins
TcChr32-S	809650	811650	origins
TcChr32-S	853964	855964	origins
TcChr32-S	879411	881411	origins
TcChr32-S	923531	925531	origins
TcChr33-S	120431	122431	origins
TcChr33-S	129540	131540	origins
TcChr33-S	226716	228716	origins
TcChr33-S	492004	494004	origins
TcChr33-S	586743	588743	origins
TcChr33-S	618083	620083	origins
TcChr33-S	79265	81265	origins
TcChr33-S	854653	856653	origins
TcChr33-S	870279	872279	origins
TcChr33-S	951552	953552	origins
TcChr34-S	423408	425408	origins
TcChr34-S	451112	453112	origins
TcChr34-S	469097	471097	origins
TcChr34-S	692457	694457	origins
TcChr34-S	739554	741554	origins
TcChr34-S	756172	758172	origins
TcChr34-S	793820	795820	origins
TcChr34-S	837395	839395	origins
TcChr34-S	867286	869286	origins
TcChr34-S	958053	960053	origins
TcChr35-S	171734	173734	origins
TcChr35-S	385936	387936	origins
TcChr35-S	391896	393896	origins
TcChr35-S	664352	666352	origins
TcChr35-S	844749	846749	origins
TcChr36-S	1106179	1108179	origins
TcChr36-S	1163657	1165657	origins
TcChr36-S	159241	161241	origins
TcChr36-S	348292	350292	origins
TcChr36-S	372944	374944	origins
TcChr36-S	832712	834712	origins
TcChr36-S	838320	840320	origins
TcChr36-S	869869	871869	origins
TcChr36-S	876244	878244	origins
TcChr36-S	962026	964026	origins
TcChr36-S	971503	973503	origins
TcChr37-S	1057485	1059485	origins
TcChr37-S	1084225	1086225	origins
TcChr37-S	1110877	1112877	origins
TcChr37-S	287355	289355	origins
TcChr37-S	372929	374929	origins
TcChr37-S	407925	409925	origins
TcChr37-S	460620	462620	origins
TcChr37-S	498938	500938	origins
TcChr37-S	850890	852890	origins
TcChr37-S	86082	88082	origins
TcChr37-S	867795	869795	origins
TcChr38-S	1097589	1099589	origins
TcChr38-S	12586	14586	origins
TcChr38-S	1218538	1220538	origins
TcChr38-S	1228385	1230385	origins
TcChr38-S	1310927	1312927	origins
TcChr38-S	135410	137410	origins
TcChr38-S	158107	160107	origins
TcChr38-S	232105	234105	origins
TcChr38-S	345863	347863	origins
TcChr39-S	1005473	1007473	origins
TcChr39-S	1054767	1056767	origins
TcChr39-S	1085419	1087419	origins
TcChr39-S	1370220	1372220	origins
TcChr39-S	1441895	1443895	origins
TcChr39-S	1706585	1708585	origins
TcChr39-S	179363	181363	origins
TcChr39-S	206281	208281	origins
TcChr39-S	361824	363824	origins
TcChr39-S	396884	398884	origins
TcChr39-S	50619	52619	origins
TcChr39-S	535014	537014	origins
TcChr39-S	565148	567148	origins
TcChr39-S	647252	649252	origins
TcChr39-S	664752	666752	origins
TcChr39-S	713898	715898	origins
TcChr39-S	793168	795168	origins
TcChr39-S	852149	854149	origins
TcChr3-S	31804	33804	origins
TcChr40-S	1046163	1048163	origins
TcChr40-S	118175	120175	origins
TcChr40-S	1235657	1237657	origins
TcChr40-S	1358075	1360075	origins
TcChr40-S	164299	166299	origins
TcChr40-S	1656463	1658463	origins
TcChr40-S	1739243	1741243	origins
TcChr40-S	1745217	1747217	origins
TcChr40-S	1758009	1760009	origins
TcChr40-S	275005	277005	origins
TcChr40-S	403865	405865	origins
TcChr40-S	423046	425046	origins
TcChr40-S	434396	436396	origins
TcChr40-S	506416	508416	origins
TcChr40-S	608576	610576	origins
TcChr40-S	617563	619563	origins
TcChr40-S	819165	821165	origins
TcChr41-S	106729	108729	origins
TcChr41-S	162420	164420	origins
TcChr41-S	1676543	1678543	origins
TcChr41-S	1757335	1759335	origins
TcChr41-S	1968619	1970619	origins
TcChr41-S	201054	203054	origins
TcChr41-S	2252910	2254910	origins
TcChr41-S	264754	266754	origins
TcChr41-S	473206	475206	origins
TcChr41-S	481164	483164	origins
TcChr4-S	13192	15192	origins
TcChr5-S	116661	118661	origins
TcChr6-S	111157	113157	origins
TcChr6-S	14862	16862	origins
TcChr6-S	184096	186096	origins
TcChr6-S	229314	231314	origins
TcChr6-S	251577	253577	origins
TcChr6-S	58826	60826	origins
TcChr6-S	73128	75128	origins
TcChr7-S	95020	97020	origins
TcChr8-S	336016	338016	origins
TcChr8-S	37848	39848	origins
TcChr9-S	162293	164293	origins
TcChr9-S	245875	247875	origins
TcChr9-S	274893	276893	origins
TcChr9-S	283888	285888	origins
TcChr9-S	298497	300497	origins
TcChr9-S	455481	457481	origins
TcChr9-S	58960	60960	origins
TcChr10-S	153576	155576	origins
TcChr10-S	168191	170191	origins
TcChr10-S	429061	431061	origins
TcChr11-S	261992	263992	origins
TcChr11-S	292970	294970	origins
TcChr11-S	313433	315433	origins
TcChr11-S	337614	339614	origins
TcChr12-S	162009	164009	origins
TcChr12-S	235194	237194	origins
TcChr12-S	32064	34064	origins
TcChr12-S	412633	414633	origins
TcChr13-S	198173	200173	origins
TcChr14-S	164258	166258	origins
TcChr14-S	173354	175354	origins
TcChr14-S	253495	255495	origins
TcChr14-S	320194	322194	origins
TcChr14-S	519489	521489	origins
TcChr14-S	560281	562281	origins
TcChr15-S	323740	325740	origins
TcChr17-S	130574	132574	origins
TcChr17-S	545167	547167	origins
TcChr18-S	104230	106230	origins
TcChr18-S	113075	115075	origins
TcChr18-S	166034	168034	origins
TcChr18-S	394570	396570	origins
TcChr19-S	229484	231484	origins
TcChr19-S	310116	312116	origins
TcChr19-S	424648	426648	origins
TcChr19-S	511486	513486	origins
TcChr21-S	132204	134204	origins
TcChr21-S	303884	305884	origins
TcChr21-S	413808	415808	origins
TcChr22-S	679538	681538	origins
TcChr23-S	432726	434726	origins
TcChr23-S	528665	530665	origins
TcChr23-S	75937	77937	origins
TcChr24-S	308683	310683	origins
TcChr25-S	119965	121965	origins
TcChr25-S	281393	283393	origins
TcChr25-S	351590	353590	origins
TcChr26-S	105318	107318	origins
TcChr26-S	562205	564205	origins
TcChr26-S	608983	610983	origins
TcChr26-S	623302	625302	origins
TcChr26-S	688184	690184	origins
TcChr26-S	700387	702387	origins
TcChr27-S	158197	160197	origins
TcChr27-S	275172	277172	origins
TcChr27-S	472324	474324	origins
TcChr28-S	190830	192830	origins
TcChr28-S	88461	90461	origins
TcChr29-S	695758	697758	origins
TcChr29-S	727110	729110	origins
TcChr2-S	118492	120492	origins
TcChr30-S	151469	153469	origins
TcChr30-S	257306	259306	origins
TcChr30-S	50786	52786	origins
TcChr30-S	796129	798129	origins
TcChr31-S	254740	256740	origins
TcChr32-S	328155	330155	origins
TcChr32-S	363123	365123	origins
TcChr32-S	519392	521392	origins
TcChr32-S	629140	631140	origins
TcChr32-S	676560	678560	origins
TcChr32-S	782358	784358	origins
TcChr32-S	899675	901675	origins
TcChr33-S	174427	176427	origins
TcChr33-S	461152	463152	origins
TcChr33-S	518055	520055	origins
TcChr34-S	17198	19198	origins
TcChr34-S	303740	305740	origins
TcChr34-S	731602	733602	origins
TcChr35-S	225707	227707	origins
TcChr35-S	241786	243786	origins
TcChr35-S	724125	726125	origins
TcChr36-S	1019877	1021877	origins
TcChr36-S	1132148	1134148	origins
TcChr36-S	223129	225129	origins
TcChr36-S	411691	413691	origins
TcChr36-S	705069	707069	origins
TcChr36-S	775431	777431	origins
TcChr36-S	853689	855689	origins
TcChr36-S	936408	938408	origins
TcChr37-S	1317898	1319898	origins
TcChr37-S	351510	353510	origins
TcChr37-S	835390	837390	origins
TcChr38-S	1103941	1105941	origins
TcChr38-S	1158159	1160159	origins
TcChr38-S	1178541	1180541	origins
TcChr38-S	140528	142528	origins
TcChr38-S	56451	58451	origins
TcChr39-S	1096855	1098855	origins
TcChr39-S	1571660	1573660	origins
TcChr39-S	1651816	1653816	origins
TcChr39-S	1714424	1716424	origins
TcChr39-S	1742113	1744113	origins
TcChr39-S	248443	250443	origins
TcChr40-S	1176131	1178131	origins
TcChr40-S	1214221	1216221	origins
TcChr40-S	1280987	1282987	origins
TcChr40-S	1310252	1312252	origins
TcChr40-S	1551372	1553372	origins
TcChr40-S	266812	268812	origins
TcChr41-S	1893208	1895208	origins
TcChr41-S	258204	260204	origins
TcChr41-S	326707	328707	origins
TcChr4-S	114158	116158	origins
TcChr4-S	127487	129487	origins
TcChr6-S	178148	180148	origins
TcChr6-S	223506	225506	origins
TcChr6-S	236501	238501	origins
TcChr6-S	296996	298996	origins
TcChr6-S	94733	96733	origins
TcChr7-S	158581	160581	origins
TcChr7-S	73617	75617	origins
TcChr8-S	16033	18033	origins
TcChr8-S	248438	250438	origins
TcChr8-S	321051	323051	origins
TcChr9-S	137968	139968	origins
TcChr9-S	149953	151953	origins
TcChr9-S	353798	355798	origins
TcChr9-S	483251	485251	origins
TcChr9-S	66015	68015	origins
TcChr9-S	78657	80657	origins
TcChr10-S	319056	321056	origins
TcChr10-S	482952	484952	origins
TcChr11-S	142928	144928	origins
TcChr13-S	182682	184682	origins
TcChr13-S	299214	301214	origins
TcChr13-S	356711	358711	origins
TcChr13-S	417316	419316	origins
TcChr14-S	471763	473763	origins
TcChr16-S	549175	551175	origins
TcChr18-S	42626	44626	origins
TcChr18-S	603484	605484	origins
TcChr19-S	329757	331757	origins
TcChr21-S	145567	147567	origins
TcChr21-S	394331	396331	origins
TcChr22-S	291698	293698	origins
TcChr22-S	554214	556214	origins
TcChr23-S	119563	121563	origins
TcChr23-S	148613	150613	origins
TcChr24-S	686609	688609	origins
TcChr24-S	746290	748290	origins
TcChr26-S	184814	186814	origins
TcChr26-S	197647	199647	origins
TcChr26-S	365223	367223	origins
TcChr26-S	435627	437627	origins
TcChr26-S	583280	585280	origins
TcChr26-S	709713	711713	origins
TcChr27-S	177616	179616	origins
TcChr27-S	255092	257092	origins
TcChr27-S	452000	454000	origins
TcChr27-S	690437	692437	origins
TcChr27-S	708507	710507	origins
TcChr28-S	110736	112736	origins
TcChr28-S	120831	122831	origins
TcChr28-S	136076	138076	origins
TcChr28-S	177839	179839	origins
TcChr29-S	462799	464799	origins
TcChr2-S	36051	38051	origins
TcChr30-S	338329	340329	origins
TcChr30-S	382215	384215	origins
TcChr30-S	573542	575542	origins
TcChr31-S	660675	662675	origins
TcChr32-S	371075	373075	origins
TcChr32-S	394377	396377	origins
TcChr32-S	907546	909546	origins
TcChr35-S	495027	497027	origins
TcChr37-S	324554	326554	origins
TcChr37-S	650875	652875	origins
TcChr38-S	1190181	1192181	origins
TcChr38-S	1275551	1277551	origins
TcChr38-S	1302677	1304677	origins
TcChr38-S	19223	21223	origins
TcChr38-S	442262	444262	origins
TcChr39-S	1019551	1021551	origins
TcChr39-S	1363299	1365299	origins
TcChr39-S	1694035	1696035	origins
TcChr39-S	546514	548514	origins
TcChr39-S	671300	673300	origins
TcChr39-S	69990	71990	origins
TcChr39-S	834172	836172	origins
TcChr39-S	871941	873941	origins
TcChr40-S	294739	296739	origins
TcChr40-S	450186	452186	origins
TcChr40-S	658530	660530	origins
TcChr40-S	704121	706121	origins
TcChr40-S	995060	997060	origins
TcChr41-S	1804065	1806065	origins
TcChr41-S	2221221	2223221	origins
TcChr4-S	140205	142205	origins
TcChr6-S	117838	119838	origins
TcChr6-S	326682	328682	origins
TcChr8-S	369657	371657	origins
TcChr9-S	127827	129827	origins
TcChr9-S	196713	198713	origins
TcChr11-S	275397	277397	origins
TcChr14-S	124909	126909	origins
TcChr17-S	621475	623475	origins
TcChr19-S	343031	345031	origins
TcChr19-S	352646	354646	origins
TcChr21-S	469981	471981	origins
TcChr22-S	403313	405313	origins
TcChr24-S	278871	280871	origins
TcChr24-S	661465	663465	origins
TcChr27-S	395944	397944	origins
TcChr27-S	503038	505038	origins
TcChr27-S	514070	516070	origins
[truncated: 2,344 more rows]

## Sheet: Table-S4
ST4. Features interscted with origins or terminations
Chromosome	Start	End	Class	Genomic feature	Description
TcChr10-S	34204	36204	origins	CDS	ID=TcCLB.511911.60:mRNA-p1-CDS1;Parent=TcCLB.511911.60:mRNA;gene_id=TcCLB.511911.60;protein_source_id=TcCLB.511911.60:mRNA-p1
TcChr10-S	34204	36204	origins	exon	ID=exon_TcCLB.511911.60:mRNA-E1;Parent=TcCLB.511911.60:mRNA;gene_id=TcCLB.511911.60
TcChr10-S	34204	36204	origins	mRNA	ID=TcCLB.511911.60:mRNA;Parent=TcCLB.511911.60;description=trans-sialidase%2C
TcChr10-S	34204	36204	origins	protein_coding_gene	ID=TcCLB.511911.60;description=trans-sialidase%2C
TcChr10-S	34204	36204	origins	polycistron-CDS	ID=polycistron-CDS_3;contentCount=13;content=TcCLB.511911.21:mRNA-p1-CDS1,TcCLB.511911.60:mRNA-p1-CDS1,TcCLB.511911.71:mRNA-p1-CDS1,TcCLB.511911.90:mRNA-p1-CDS1,TcCLB.511911.94:mRNA-p1-CDS1,TcCLB.511911.98:mRNA-p1-CDS1,TcCLB.511911.102:mRNA-p1-CDS1,TcCLB.511911.110:mRNA-p1-CDS1,TcCLB.511911.120:mRNA-p1-CDS1,TcCLB.511911.130:mRNA-p1-CDS1,TcCLB.511911.140:mRNA-p1-CDS1,TcCLB.511911.150:mRNA-p1-CDS1,…
TcChr10-S	42574	44574	origins	CDS	ID=TcCLB.511911.90:mRNA-p1-CDS1;Parent=TcCLB.511911.90:mRNA;gene_id=TcCLB.511911.90;protein_source_id=TcCLB.511911.90:mRNA-p1
TcChr10-S	42574	44574	origins	exon	ID=exon_TcCLB.511911.90:mRNA-E1;Parent=TcCLB.511911.90:mRNA;gene_id=TcCLB.511911.90
TcChr10-S	42574	44574	origins	mRNA	ID=TcCLB.511911.90:mRNA;Parent=TcCLB.511911.90;description=hypothetical
TcChr10-S	42574	44574	origins	protein_coding_gene	ID=TcCLB.511911.90;description=hypothetical
TcChr10-S	42574	44574	origins	polycistron-CDS	ID=polycistron-CDS_3;contentCount=13;content=TcCLB.511911.21:mRNA-p1-CDS1,TcCLB.511911.60:mRNA-p1-CDS1,TcCLB.511911.71:mRNA-p1-CDS1,TcCLB.511911.90:mRNA-p1-CDS1,TcCLB.511911.94:mRNA-p1-CDS1,TcCLB.511911.98:mRNA-p1-CDS1,TcCLB.511911.102:mRNA-p1-CDS1,TcCLB.511911.110:mRNA-p1-CDS1,TcCLB.511911.120:mRNA-p1-CDS1,TcCLB.511911.130:mRNA-p1-CDS1,TcCLB.511911.140:mRNA-p1-CDS1,TcCLB.511911.150:mRNA-p1-CDS1,…
TcChr10-S	57179	59179	origins	CDS	ID=TcCLB.511911.120:mRNA-p1-CDS1;Parent=TcCLB.511911.120:mRNA;gene_id=TcCLB.511911.120;protein_source_id=TcCLB.511911.120:mRNA-p1
TcChr10-S	57179	59179	origins	exon	ID=exon_TcCLB.511911.120:mRNA-E1;Parent=TcCLB.511911.120:mRNA;gene_id=TcCLB.511911.120
TcChr10-S	57179	59179	origins	mRNA	ID=TcCLB.511911.120:mRNA;Parent=TcCLB.511911.120;description=DNA
TcChr10-S	57179	59179	origins	protein_coding_gene	ID=TcCLB.511911.120;description=DNA
TcChr10-S	57179	59179	origins	polycistron-CDS	ID=polycistron-CDS_3;contentCount=13;content=TcCLB.511911.21:mRNA-p1-CDS1,TcCLB.511911.60:mRNA-p1-CDS1,TcCLB.511911.71:mRNA-p1-CDS1,TcCLB.511911.90:mRNA-p1-CDS1,TcCLB.511911.94:mRNA-p1-CDS1,TcCLB.511911.98:mRNA-p1-CDS1,TcCLB.511911.102:mRNA-p1-CDS1,TcCLB.511911.110:mRNA-p1-CDS1,TcCLB.511911.120:mRNA-p1-CDS1,TcCLB.511911.130:mRNA-p1-CDS1,TcCLB.511911.140:mRNA-p1-CDS1,TcCLB.511911.150:mRNA-p1-CDS1,…
TcChr10-S	106143	108143	origins	CDS	ID=TcCLB.509247.30:mRNA-p1-CDS1;Parent=TcCLB.509247.30:mRNA;gene_id=TcCLB.509247.30;protein_source_id=TcCLB.509247.30:mRNA-p1
TcChr10-S	106143	108143	origins	exon	ID=exon_TcCLB.509247.30:mRNA-E1;Parent=TcCLB.509247.30:mRNA;gene_id=TcCLB.509247.30
TcChr10-S	106143	108143	origins	mRNA	ID=TcCLB.509247.30:mRNA;Parent=TcCLB.509247.30;description=CCR4-NOT
TcChr10-S	106143	108143	origins	protein_coding_gene	ID=TcCLB.509247.30;Name=NOT1;description=CCR4-NOT
TcChr10-S	106143	108143	origins	polycistron-CDS	ID=polycistron-CDS_4;contentCount=53;content=TcCLB.509245.10:mRNA-p1-CDS1,TcCLB.509245.20:mRNA-p1-CDS1,TcCLB.509245.29:mRNA-p1-CDS1,TcCLB.509247.10:mRNA-p1-CDS1,TcCLB.509247.20:mRNA-p1-CDS1,TcCLB.509247.30:mRNA-p1-CDS1,TcCLB.509247.50:mRNA-p1-CDS1,TcCLB.504133.45:mRNA-p1-CDS1,TcCLB.504133.30:mRNA-p1-CDS1,TcCLB.504133.15:mRNA-p1-CDS1,TcCLB.507933.10:mRNA-p1-CDS1,TcCLB.507933.20:mRNA-p1-CDS1,TcCLB.…
TcChr10-S	153576	155576	origins	CDS	ID=TcCLB.506457.50:mRNA-p1-CDS1;Parent=TcCLB.506457.50:mRNA;gene_id=TcCLB.506457.50;protein_source_id=TcCLB.506457.50:mRNA-p1
TcChr10-S	153576	155576	origins	exon	ID=exon_TcCLB.506457.50:mRNA-E1;Parent=TcCLB.506457.50:mRNA;gene_id=TcCLB.506457.50
TcChr10-S	153576	155576	origins	mRNA	ID=TcCLB.506457.50:mRNA;Parent=TcCLB.506457.50;description=Serine/threonine-protein
TcChr10-S	153576	155576	origins	protein_coding_gene	ID=TcCLB.506457.50;Name=NEK19;description=Serine/threonine-protein
TcChr10-S	153576	155576	origins	CDS	ID=TcCLB.506457.60:mRNA-p1-CDS1;Parent=TcCLB.506457.60:mRNA;gene_id=TcCLB.506457.60;protein_source_id=TcCLB.506457.60:mRNA-p1
TcChr10-S	153576	155576	origins	exon	ID=exon_TcCLB.506457.60:mRNA-E1;Parent=TcCLB.506457.60:mRNA;gene_id=TcCLB.506457.60
TcChr10-S	153576	155576	origins	mRNA	ID=TcCLB.506457.60:mRNA;Parent=TcCLB.506457.60;description=2-aminoethylphosphonate:pyruvateaminotransferase-
TcChr10-S	153576	155576	origins	protein_coding_gene	ID=TcCLB.506457.60;description=2-aminoethylphosphonate:pyruvateaminotransferase-
TcChr10-S	153576	155576	origins	polycistron-CDS	ID=polycistron-CDS_4;contentCount=53;content=TcCLB.509245.10:mRNA-p1-CDS1,TcCLB.509245.20:mRNA-p1-CDS1,TcCLB.509245.29:mRNA-p1-CDS1,TcCLB.509247.10:mRNA-p1-CDS1,TcCLB.509247.20:mRNA-p1-CDS1,TcCLB.509247.30:mRNA-p1-CDS1,TcCLB.509247.50:mRNA-p1-CDS1,TcCLB.504133.45:mRNA-p1-CDS1,TcCLB.504133.30:mRNA-p1-CDS1,TcCLB.504133.15:mRNA-p1-CDS1,TcCLB.507933.10:mRNA-p1-CDS1,TcCLB.507933.20:mRNA-p1-CDS1,TcCLB.…
TcChr10-S	161149	163149	origins	CDS	ID=TcCLB.506457.99:mRNA-p1-CDS1;Parent=TcCLB.506457.99:mRNA;gene_id=TcCLB.506457.99;protein_source_id=TcCLB.506457.99:mRNA-p1
TcChr10-S	161149	163149	origins	exon	ID=exon_TcCLB.506457.99:mRNA-E1;Parent=TcCLB.506457.99:mRNA;gene_id=TcCLB.506457.99
TcChr10-S	161149	163149	origins	mRNA	ID=TcCLB.506457.99:mRNA;Parent=TcCLB.506457.99;description=hypothetical
TcChr10-S	161149	163149	origins	protein_coding_gene	ID=TcCLB.506457.99;description=hypothetical
TcChr10-S	161149	163149	origins	polycistron-CDS	ID=polycistron-CDS_4;contentCount=53;content=TcCLB.509245.10:mRNA-p1-CDS1,TcCLB.509245.20:mRNA-p1-CDS1,TcCLB.509245.29:mRNA-p1-CDS1,TcCLB.509247.10:mRNA-p1-CDS1,TcCLB.509247.20:mRNA-p1-CDS1,TcCLB.509247.30:mRNA-p1-CDS1,TcCLB.509247.50:mRNA-p1-CDS1,TcCLB.504133.45:mRNA-p1-CDS1,TcCLB.504133.30:mRNA-p1-CDS1,TcCLB.504133.15:mRNA-p1-CDS1,TcCLB.507933.10:mRNA-p1-CDS1,TcCLB.507933.20:mRNA-p1-CDS1,TcCLB.…
TcChr10-S	168191	170191	origins	CDS	ID=TcCLB.506457.130:mRNA-p1-CDS1;Parent=TcCLB.506457.130:mRNA;gene_id=TcCLB.506457.130;protein_source_id=TcCLB.506457.130:mRNA-p1
TcChr10-S	168191	170191	origins	exon	ID=exon_TcCLB.506457.130:mRNA-E1;Parent=TcCLB.506457.130:mRNA;gene_id=TcCLB.506457.130
TcChr10-S	168191	170191	origins	mRNA	ID=TcCLB.506457.130:mRNA;Parent=TcCLB.506457.130;description=Domain
TcChr10-S	168191	170191	origins	protein_coding_gene	ID=TcCLB.506457.130;description=Domain
TcChr10-S	168191	170191	origins	polycistron-CDS	ID=polycistron-CDS_4;contentCount=53;content=TcCLB.509245.10:mRNA-p1-CDS1,TcCLB.509245.20:mRNA-p1-CDS1,TcCLB.509245.29:mRNA-p1-CDS1,TcCLB.509247.10:mRNA-p1-CDS1,TcCLB.509247.20:mRNA-p1-CDS1,TcCLB.509247.30:mRNA-p1-CDS1,TcCLB.509247.50:mRNA-p1-CDS1,TcCLB.504133.45:mRNA-p1-CDS1,TcCLB.504133.30:mRNA-p1-CDS1,TcCLB.504133.15:mRNA-p1-CDS1,TcCLB.507933.10:mRNA-p1-CDS1,TcCLB.507933.20:mRNA-p1-CDS1,TcCLB.…
TcChr10-S	188270	190270	origins	CDS	ID=TcCLB.509967.70:mRNA-p1-CDS1;Parent=TcCLB.509967.70:mRNA;gene_id=TcCLB.509967.70;protein_source_id=TcCLB.509967.70:mRNA-p1
TcChr10-S	188270	190270	origins	exon	ID=exon_TcCLB.509967.70:mRNA-E1;Parent=TcCLB.509967.70:mRNA;gene_id=TcCLB.509967.70
TcChr10-S	188270	190270	origins	mRNA	ID=TcCLB.509967.70:mRNA;Parent=TcCLB.509967.70;description=katanin%2C
TcChr10-S	188270	190270	origins	protein_coding_gene	ID=TcCLB.509967.70;description=katanin%2C
TcChr10-S	188270	190270	origins	polycistron-CDS	ID=polycistron-CDS_4;contentCount=53;content=TcCLB.509245.10:mRNA-p1-CDS1,TcCLB.509245.20:mRNA-p1-CDS1,TcCLB.509245.29:mRNA-p1-CDS1,TcCLB.509247.10:mRNA-p1-CDS1,TcCLB.509247.20:mRNA-p1-CDS1,TcCLB.509247.30:mRNA-p1-CDS1,TcCLB.509247.50:mRNA-p1-CDS1,TcCLB.504133.45:mRNA-p1-CDS1,TcCLB.504133.30:mRNA-p1-CDS1,TcCLB.504133.15:mRNA-p1-CDS1,TcCLB.507933.10:mRNA-p1-CDS1,TcCLB.507933.20:mRNA-p1-CDS1,TcCLB.…
TcChr10-S	192952	194952	origins	CDS	ID=TcCLB.509967.90:mRNA-p1-CDS1;Parent=TcCLB.509967.90:mRNA;gene_id=TcCLB.509967.90;protein_source_id=TcCLB.509967.90:mRNA-p1
TcChr10-S	192952	194952	origins	exon	ID=exon_TcCLB.509967.90:mRNA-E1;Parent=TcCLB.509967.90:mRNA;gene_id=TcCLB.509967.90
TcChr10-S	192952	194952	origins	mRNA	ID=TcCLB.509967.90:mRNA;Parent=TcCLB.509967.90;description=hypothetical
TcChr10-S	192952	194952	origins	protein_coding_gene	ID=TcCLB.509967.90;description=hypothetical
TcChr10-S	192952	194952	origins	polycistron-CDS	ID=polycistron-CDS_4;contentCount=53;content=TcCLB.509245.10:mRNA-p1-CDS1,TcCLB.509245.20:mRNA-p1-CDS1,TcCLB.509245.29:mRNA-p1-CDS1,TcCLB.509247.10:mRNA-p1-CDS1,TcCLB.509247.20:mRNA-p1-CDS1,TcCLB.509247.30:mRNA-p1-CDS1,TcCLB.509247.50:mRNA-p1-CDS1,TcCLB.504133.45:mRNA-p1-CDS1,TcCLB.504133.30:mRNA-p1-CDS1,TcCLB.504133.15:mRNA-p1-CDS1,TcCLB.507933.10:mRNA-p1-CDS1,TcCLB.507933.20:mRNA-p1-CDS1,TcCLB.…
TcChr10-S	199077	201077	origins	exon	ID=exon_TcCLB.509967.120:pseudogenic_transcript-E1;Parent=TcCLB.509967.120:pseudogenic_transcript;gene_id=TcCLB.509967.120
TcChr10-S	199077	201077	origins	pseudogene	ID=TcCLB.509967.120;description=intraflagellar
TcChr10-S	199077	201077	origins	pseudogenic_transcript	ID=TcCLB.509967.120:pseudogenic_transcript;Parent=TcCLB.509967.120;description=intraflagellar
TcChr10-S	199077	201077	origins	polycistron-CDS	ID=polycistron-CDS_4;contentCount=53;content=TcCLB.509245.10:mRNA-p1-CDS1,TcCLB.509245.20:mRNA-p1-CDS1,TcCLB.509245.29:mRNA-p1-CDS1,TcCLB.509247.10:mRNA-p1-CDS1,TcCLB.509247.20:mRNA-p1-CDS1,TcCLB.509247.30:mRNA-p1-CDS1,TcCLB.509247.50:mRNA-p1-CDS1,TcCLB.504133.45:mRNA-p1-CDS1,TcCLB.504133.30:mRNA-p1-CDS1,TcCLB.504133.15:mRNA-p1-CDS1,TcCLB.507933.10:mRNA-p1-CDS1,TcCLB.507933.20:mRNA-p1-CDS1,TcCLB.…
TcChr10-S	249620	251620	origins	polycistron-CDS	ID=polycistron-CDS_5;contentCount=31;content=TcCLB.508673.20:mRNA-p1-CDS1,TcCLB.511129.40:mRNA-p1-CDS1,TcCLB.511129.60:mRNA-p1-CDS1,TcCLB.511129.80:mRNA-p1-CDS1,TcCLB.511131.20:mRNA-p1-CDS1,TcCLB.511131.30:mRNA-p1-CDS1,TcCLB.511131.40:mRNA-p1-CDS1,TcCLB.511131.50:mRNA-p1-CDS1,TcCLB.511131.60:mRNA-p1-CDS1,TcCLB.511131.70:mRNA-p1-CDS1,TcCLB.511131.80:mRNA-p1-CDS1,TcCLB.511131.89:mRNA-p1-CDS1,TcCLB.…
TcChr10-S	267104	269104	origins	CDS	ID=TcCLB.511129.80:mRNA-p1-CDS1;Parent=TcCLB.511129.80:mRNA;gene_id=TcCLB.511129.80;protein_source_id=TcCLB.511129.80:mRNA-p1
TcChr10-S	267104	269104	origins	exon	ID=exon_TcCLB.511129.80:mRNA-E1;Parent=TcCLB.511129.80:mRNA;gene_id=TcCLB.511129.80
TcChr10-S	267104	269104	origins	mRNA	ID=TcCLB.511129.80:mRNA;Parent=TcCLB.511129.80;description=UDP-Gal
TcChr10-S	267104	269104	origins	protein_coding_gene	ID=TcCLB.511129.80;description=UDP-Gal
TcChr10-S	267104	269104	origins	polycistron-CDS	ID=polycistron-CDS_5;contentCount=31;content=TcCLB.508673.20:mRNA-p1-CDS1,TcCLB.511129.40:mRNA-p1-CDS1,TcCLB.511129.60:mRNA-p1-CDS1,TcCLB.511129.80:mRNA-p1-CDS1,TcCLB.511131.20:mRNA-p1-CDS1,TcCLB.511131.30:mRNA-p1-CDS1,TcCLB.511131.40:mRNA-p1-CDS1,TcCLB.511131.50:mRNA-p1-CDS1,TcCLB.511131.60:mRNA-p1-CDS1,TcCLB.511131.70:mRNA-p1-CDS1,TcCLB.511131.80:mRNA-p1-CDS1,TcCLB.511131.89:mRNA-p1-CDS1,TcCLB.…
TcChr10-S	279415	281415	origins	CDS	ID=TcCLB.511131.50:mRNA-p1-CDS1;Parent=TcCLB.511131.50:mRNA;gene_id=TcCLB.511131.50;protein_source_id=TcCLB.511131.50:mRNA-p1
TcChr10-S	279415	281415	origins	exon	ID=exon_TcCLB.511131.50:mRNA-E1;Parent=TcCLB.511131.50:mRNA;gene_id=TcCLB.511131.50
TcChr10-S	279415	281415	origins	mRNA	ID=TcCLB.511131.50:mRNA;Parent=TcCLB.511131.50;Note=2.7.11.1
TcChr10-S	279415	281415	origins	protein_coding_gene	ID=TcCLB.511131.50;description=U4/U6
TcChr10-S	279415	281415	origins	polycistron-CDS	ID=polycistron-CDS_5;contentCount=31;content=TcCLB.508673.20:mRNA-p1-CDS1,TcCLB.511129.40:mRNA-p1-CDS1,TcCLB.511129.60:mRNA-p1-CDS1,TcCLB.511129.80:mRNA-p1-CDS1,TcCLB.511131.20:mRNA-p1-CDS1,TcCLB.511131.30:mRNA-p1-CDS1,TcCLB.511131.40:mRNA-p1-CDS1,TcCLB.511131.50:mRNA-p1-CDS1,TcCLB.511131.60:mRNA-p1-CDS1,TcCLB.511131.70:mRNA-p1-CDS1,TcCLB.511131.80:mRNA-p1-CDS1,TcCLB.511131.89:mRNA-p1-CDS1,TcCLB.…
TcChr10-S	284769	286769	origins	CDS	ID=TcCLB.511131.80:mRNA-p1-CDS1;Parent=TcCLB.511131.80:mRNA;gene_id=TcCLB.511131.80;protein_source_id=TcCLB.511131.80:mRNA-p1
TcChr10-S	284769	286769	origins	exon	ID=exon_TcCLB.511131.80:mRNA-E1;Parent=TcCLB.511131.80:mRNA;gene_id=TcCLB.511131.80
TcChr10-S	284769	286769	origins	mRNA	ID=TcCLB.511131.80:mRNA;Parent=TcCLB.511131.80;description=hypothetical
TcChr10-S	284769	286769	origins	protein_coding_gene	ID=TcCLB.511131.80;description=hypothetical
TcChr10-S	284769	286769	origins	polycistron-CDS	ID=polycistron-CDS_5;contentCount=31;content=TcCLB.508673.20:mRNA-p1-CDS1,TcCLB.511129.40:mRNA-p1-CDS1,TcCLB.511129.60:mRNA-p1-CDS1,TcCLB.511129.80:mRNA-p1-CDS1,TcCLB.511131.20:mRNA-p1-CDS1,TcCLB.511131.30:mRNA-p1-CDS1,TcCLB.511131.40:mRNA-p1-CDS1,TcCLB.511131.50:mRNA-p1-CDS1,TcCLB.511131.60:mRNA-p1-CDS1,TcCLB.511131.70:mRNA-p1-CDS1,TcCLB.511131.80:mRNA-p1-CDS1,TcCLB.511131.89:mRNA-p1-CDS1,TcCLB.…
TcChr10-S	291529	293529	origins	CDS	ID=TcCLB.511131.89:mRNA-p1-CDS1;Parent=TcCLB.511131.89:mRNA;gene_id=TcCLB.511131.89;protein_source_id=TcCLB.511131.89:mRNA-p1
TcChr10-S	291529	293529	origins	exon	ID=exon_TcCLB.511131.89:mRNA-E1;Parent=TcCLB.511131.89:mRNA;gene_id=TcCLB.511131.89
TcChr10-S	291529	293529	origins	mRNA	ID=TcCLB.511131.89:mRNA;Parent=TcCLB.511131.89;description=hypothetical
TcChr10-S	291529	293529	origins	protein_coding_gene	ID=TcCLB.511131.89;description=hypothetical
TcChr10-S	291529	293529	origins	polycistron-CDS	ID=polycistron-CDS_5;contentCount=31;content=TcCLB.508673.20:mRNA-p1-CDS1,TcCLB.511129.40:mRNA-p1-CDS1,TcCLB.511129.60:mRNA-p1-CDS1,TcCLB.511129.80:mRNA-p1-CDS1,TcCLB.511131.20:mRNA-p1-CDS1,TcCLB.511131.30:mRNA-p1-CDS1,TcCLB.511131.40:mRNA-p1-CDS1,TcCLB.511131.50:mRNA-p1-CDS1,TcCLB.511131.60:mRNA-p1-CDS1,TcCLB.511131.70:mRNA-p1-CDS1,TcCLB.511131.80:mRNA-p1-CDS1,TcCLB.511131.89:mRNA-p1-CDS1,TcCLB.…
TcChr10-S	297053	299053	origins	CDS	ID=TcCLB.511133.10:mRNA-p1-CDS1;Parent=TcCLB.511133.10:mRNA;gene_id=TcCLB.511133.10;protein_source_id=TcCLB.511133.10:mRNA-p1
TcChr10-S	297053	299053	origins	exon	ID=exon_TcCLB.511133.10:mRNA-E1;Parent=TcCLB.511133.10:mRNA;gene_id=TcCLB.511133.10
TcChr10-S	297053	299053	origins	mRNA	ID=TcCLB.511133.10:mRNA;Parent=TcCLB.511133.10;description=hypothetical
TcChr10-S	297053	299053	origins	protein_coding_gene	ID=TcCLB.511133.10;description=hypothetical
TcChr10-S	297053	299053	origins	CDS	ID=TcCLB.511133.20:mRNA-p1-CDS1;Parent=TcCLB.511133.20:mRNA;gene_id=TcCLB.511133.20;protein_source_id=TcCLB.511133.20:mRNA-p1
TcChr10-S	297053	299053	origins	exon	ID=exon_TcCLB.511133.20:mRNA-E1;Parent=TcCLB.511133.20:mRNA;gene_id=TcCLB.511133.20
TcChr10-S	297053	299053	origins	mRNA	ID=TcCLB.511133.20:mRNA;Parent=TcCLB.511133.20;Note=2.7.1.21
TcChr10-S	297053	299053	origins	protein_coding_gene	ID=TcCLB.511133.20;description=thymidine
TcChr10-S	297053	299053	origins	polycistron-CDS	ID=polycistron-CDS_5;contentCount=31;content=TcCLB.508673.20:mRNA-p1-CDS1,TcCLB.511129.40:mRNA-p1-CDS1,TcCLB.511129.60:mRNA-p1-CDS1,TcCLB.511129.80:mRNA-p1-CDS1,TcCLB.511131.20:mRNA-p1-CDS1,TcCLB.511131.30:mRNA-p1-CDS1,TcCLB.511131.40:mRNA-p1-CDS1,TcCLB.511131.50:mRNA-p1-CDS1,TcCLB.511131.60:mRNA-p1-CDS1,TcCLB.511131.70:mRNA-p1-CDS1,TcCLB.511131.80:mRNA-p1-CDS1,TcCLB.511131.89:mRNA-p1-CDS1,TcCLB.…
TcChr10-S	319056	321056	origins	CDS	ID=TcCLB.503479.40:mRNA-p1-CDS1;Parent=TcCLB.503479.40:mRNA;gene_id=TcCLB.503479.40;protein_source_id=TcCLB.503479.40:mRNA-p1
TcChr10-S	319056	321056	origins	exon	ID=exon_TcCLB.503479.40:mRNA-E1;Parent=TcCLB.503479.40:mRNA;gene_id=TcCLB.503479.40
TcChr10-S	319056	321056	origins	mRNA	ID=TcCLB.503479.40:mRNA;Parent=TcCLB.503479.40;description=Flagellum
TcChr10-S	319056	321056	origins	protein_coding_gene	ID=TcCLB.503479.40;Name=FAZ6;description=Flagellum
TcChr10-S	319056	321056	origins	polycistron-CDS	ID=polycistron-CDS_5;contentCount=31;content=TcCLB.508673.20:mRNA-p1-CDS1,TcCLB.511129.40:mRNA-p1-CDS1,TcCLB.511129.60:mRNA-p1-CDS1,TcCLB.511129.80:mRNA-p1-CDS1,TcCLB.511131.20:mRNA-p1-CDS1,TcCLB.511131.30:mRNA-p1-CDS1,TcCLB.511131.40:mRNA-p1-CDS1,TcCLB.511131.50:mRNA-p1-CDS1,TcCLB.511131.60:mRNA-p1-CDS1,TcCLB.511131.70:mRNA-p1-CDS1,TcCLB.511131.80:mRNA-p1-CDS1,TcCLB.511131.89:mRNA-p1-CDS1,TcCLB.…
TcChr10-S	337376	339376	origins	CDS	ID=TcCLB.508779.70:mRNA-p1-CDS1;Parent=TcCLB.508779.70:mRNA;gene_id=TcCLB.508779.70;protein_source_id=TcCLB.508779.70:mRNA-p1
TcChr10-S	337376	339376	origins	exon	ID=exon_TcCLB.508779.70:mRNA-E1;Parent=TcCLB.508779.70:mRNA;gene_id=TcCLB.508779.70
TcChr10-S	337376	339376	origins	mRNA	ID=TcCLB.508779.70:mRNA;Parent=TcCLB.508779.70;description=hypothetical
TcChr10-S	337376	339376	origins	protein_coding_gene	ID=TcCLB.508779.70;description=hypothetical
TcChr10-S	337376	339376	origins	polycistron-CDS	ID=polycistron-CDS_5;contentCount=31;content=TcCLB.508673.20:mRNA-p1-CDS1,TcCLB.511129.40:mRNA-p1-CDS1,TcCLB.511129.60:mRNA-p1-CDS1,TcCLB.511129.80:mRNA-p1-CDS1,TcCLB.511131.20:mRNA-p1-CDS1,TcCLB.511131.30:mRNA-p1-CDS1,TcCLB.511131.40:mRNA-p1-CDS1,TcCLB.511131.50:mRNA-p1-CDS1,TcCLB.511131.60:mRNA-p1-CDS1,TcCLB.511131.70:mRNA-p1-CDS1,TcCLB.511131.80:mRNA-p1-CDS1,TcCLB.511131.89:mRNA-p1-CDS1,TcCLB.…
TcChr10-S	384205	386205	origins	CDS	ID=TcCLB.511137.10:mRNA-p1-CDS1;Parent=TcCLB.511137.10:mRNA;gene_id=TcCLB.511137.10;protein_source_id=TcCLB.511137.10:mRNA-p1
TcChr10-S	384205	386205	origins	exon	ID=exon_TcCLB.511137.10:mRNA-E1;Parent=TcCLB.511137.10:mRNA;gene_id=TcCLB.511137.10
TcChr10-S	384205	386205	origins	mRNA	ID=TcCLB.511137.10:mRNA;Parent=TcCLB.511137.10;description=hypothetical
TcChr10-S	384205	386205	origins	protein_coding_gene	ID=TcCLB.511137.10;description=hypothetical
TcChr10-S	384205	386205	origins	CDS	ID=TcCLB.511137.20:mRNA-p1-CDS1;Parent=TcCLB.511137.20:mRNA;gene_id=TcCLB.511137.20;protein_source_id=TcCLB.511137.20:mRNA-p1
TcChr10-S	384205	386205	origins	exon	ID=exon_TcCLB.511137.20:mRNA-E1;Parent=TcCLB.511137.20:mRNA;gene_id=TcCLB.511137.20
TcChr10-S	384205	386205	origins	mRNA	ID=TcCLB.511137.20:mRNA;Parent=TcCLB.511137.20;description=Sec8
TcChr10-S	384205	386205	origins	protein_coding_gene	ID=TcCLB.511137.20;description=Sec8
TcChr10-S	384205	386205	origins	polycistron-CDS	ID=polycistron-CDS_6;contentCount=61;content=TcCLB.508781.20:mRNA-p1-CDS1,TcCLB.508781.30:mRNA-p1-CDS1,TcCLB.508781.40:mRNA-p1-CDS1,TcCLB.508781.60:mRNA-p1-CDS1,TcCLB.508781.70:mRNA-p1-CDS1,TcCLB.508781.80:mRNA-p1-CDS1,TcCLB.508781.90:mRNA-p1-CDS1,TcCLB.508781.110:mRNA-p1-CDS1,TcCLB.508781.120:mRNA-p1-CDS1,TcCLB.417797.9:mRNA-p1-CDS1,TcCLB.511135.20:mRNA-p1-CDS1,TcCLB.511135.30:mRNA-p1-CDS1,TcCLB…
TcChr10-S	399078	401078	origins	CDS	ID=TcCLB.508785.10:mRNA-p1-CDS1;Parent=TcCLB.508785.10:mRNA;gene_id=TcCLB.508785.10;protein_source_id=TcCLB.508785.10:mRNA-p1
TcChr10-S	399078	401078	origins	exon	ID=exon_TcCLB.508785.10:mRNA-E1;Parent=TcCLB.508785.10:mRNA;gene_id=TcCLB.508785.10
TcChr10-S	399078	401078	origins	mRNA	ID=TcCLB.508785.10:mRNA;Parent=TcCLB.508785.10;description=Present
TcChr10-S	399078	401078	origins	protein_coding_gene	ID=TcCLB.508785.10;Name=POMP19;description=Present
TcChr10-S	399078	401078	origins	polycistron-CDS	ID=polycistron-CDS_6;contentCount=61;content=TcCLB.508781.20:mRNA-p1-CDS1,TcCLB.508781.30:mRNA-p1-CDS1,TcCLB.508781.40:mRNA-p1-CDS1,TcCLB.508781.60:mRNA-p1-CDS1,TcCLB.508781.70:mRNA-p1-CDS1,TcCLB.508781.80:mRNA-p1-CDS1,TcCLB.508781.90:mRNA-p1-CDS1,TcCLB.508781.110:mRNA-p1-CDS1,TcCLB.508781.120:mRNA-p1-CDS1,TcCLB.417797.9:mRNA-p1-CDS1,TcCLB.511135.20:mRNA-p1-CDS1,TcCLB.511135.30:mRNA-p1-CDS1,TcCLB…
TcChr10-S	414051	416051	origins	CDS	ID=TcCLB.511143.12:mRNA-p1-CDS1;Parent=TcCLB.511143.12:mRNA;gene_id=TcCLB.511143.12;protein_source_id=TcCLB.511143.12:mRNA-p1
TcChr10-S	414051	416051	origins	exon	ID=exon_TcCLB.511143.12:mRNA-E1;Parent=TcCLB.511143.12:mRNA;gene_id=TcCLB.511143.12
TcChr10-S	414051	416051	origins	mRNA	ID=TcCLB.511143.12:mRNA;Parent=TcCLB.511143.12;description=Microtubule-binding
TcChr10-S	414051	416051	origins	protein_coding_gene	ID=TcCLB.511143.12;description=Microtubule-binding
TcChr10-S	414051	416051	origins	CDS	ID=TcCLB.511143.19:mRNA-p1-CDS1;Parent=TcCLB.511143.19:mRNA;gene_id=TcCLB.511143.19;protein_source_id=TcCLB.511143.19:mRNA-p1
TcChr10-S	414051	416051	origins	exon	ID=exon_TcCLB.511143.19:mRNA-E1;Parent=TcCLB.511143.19:mRNA;gene_id=TcCLB.511143.19
TcChr10-S	414051	416051	origins	mRNA	ID=TcCLB.511143.19:mRNA;Parent=TcCLB.511143.19;description=hypothetical
TcChr10-S	414051	416051	origins	protein_coding_gene	ID=TcCLB.511143.19;description=hypothetical
TcChr10-S	414051	416051	origins	polycistron-CDS	ID=polycistron-CDS_6;contentCount=61;content=TcCLB.508781.20:mRNA-p1-CDS1,TcCLB.508781.30:mRNA-p1-CDS1,TcCLB.508781.40:mRNA-p1-CDS1,TcCLB.508781.60:mRNA-p1-CDS1,TcCLB.508781.70:mRNA-p1-CDS1,TcCLB.508781.80:mRNA-p1-CDS1,TcCLB.508781.90:mRNA-p1-CDS1,TcCLB.508781.110:mRNA-p1-CDS1,TcCLB.508781.120:mRNA-p1-CDS1,TcCLB.417797.9:mRNA-p1-CDS1,TcCLB.511135.20:mRNA-p1-CDS1,TcCLB.511135.30:mRNA-p1-CDS1,TcCLB…
TcChr10-S	422044	424044	origins	CDS	ID=TcCLB.506869.10:mRNA-p1-CDS1;Parent=TcCLB.506869.10:mRNA;gene_id=TcCLB.506869.10;protein_source_id=TcCLB.506869.10:mRNA-p1
TcChr10-S	422044	424044	origins	exon	ID=exon_TcCLB.506869.10:mRNA-E1;Parent=TcCLB.506869.10:mRNA;gene_id=TcCLB.506869.10
TcChr10-S	422044	424044	origins	mRNA	ID=TcCLB.506869.10:mRNA;Parent=TcCLB.506869.10;description=hypothetical
TcChr10-S	422044	424044	origins	protein_coding_gene	ID=TcCLB.506869.10;description=hypothetical
TcChr10-S	422044	424044	origins	CDS	ID=TcCLB.506869.20:mRNA-p1-CDS1;Parent=TcCLB.506869.20:mRNA;gene_id=TcCLB.506869.20;protein_source_id=TcCLB.506869.20:mRNA-p1
TcChr10-S	422044	424044	origins	exon	ID=exon_TcCLB.506869.20:mRNA-E1;Parent=TcCLB.506869.20:mRNA;gene_id=TcCLB.506869.20
TcChr10-S	422044	424044	origins	mRNA	ID=TcCLB.506869.20:mRNA;Parent=TcCLB.506869.20;description=hypothetical
TcChr10-S	422044	424044	origins	protein_coding_gene	ID=TcCLB.506869.20;description=hypothetical
TcChr10-S	422044	424044	origins	polycistron-CDS	ID=polycistron-CDS_6;contentCount=61;content=TcCLB.508781.20:mRNA-p1-CDS1,TcCLB.508781.30:mRNA-p1-CDS1,TcCLB.508781.40:mRNA-p1-CDS1,TcCLB.508781.60:mRNA-p1-CDS1,TcCLB.508781.70:mRNA-p1-CDS1,TcCLB.508781.80:mRNA-p1-CDS1,TcCLB.508781.90:mRNA-p1-CDS1,TcCLB.508781.110:mRNA-p1-CDS1,TcCLB.508781.120:mRNA-p1-CDS1,TcCLB.417797.9:mRNA-p1-CDS1,TcCLB.511135.20:mRNA-p1-CDS1,TcCLB.511135.30:mRNA-p1-CDS1,TcCLB…
TcChr10-S	429061	431061	origins	CDS	ID=TcCLB.506869.54:mRNA-p1-CDS1;Parent=TcCLB.506869.54:mRNA;gene_id=TcCLB.506869.54;protein_source_id=TcCLB.506869.54:mRNA-p1
TcChr10-S	429061	431061	origins	exon	ID=exon_TcCLB.506869.54:mRNA-E1;Parent=TcCLB.506869.54:mRNA;gene_id=TcCLB.506869.54
TcChr10-S	429061	431061	origins	mRNA	ID=TcCLB.506869.54:mRNA;Parent=TcCLB.506869.54;description=hypothetical
TcChr10-S	429061	431061	origins	protein_coding_gene	ID=TcCLB.506869.54;description=hypothetical
TcChr10-S	429061	431061	origins	polycistron-CDS	ID=polycistron-CDS_6;contentCount=61;content=TcCLB.508781.20:mRNA-p1-CDS1,TcCLB.508781.30:mRNA-p1-CDS1,TcCLB.508781.40:mRNA-p1-CDS1,TcCLB.508781.60:mRNA-p1-CDS1,TcCLB.508781.70:mRNA-p1-CDS1,TcCLB.508781.80:mRNA-p1-CDS1,TcCLB.508781.90:mRNA-p1-CDS1,TcCLB.508781.110:mRNA-p1-CDS1,TcCLB.508781.120:mRNA-p1-CDS1,TcCLB.417797.9:mRNA-p1-CDS1,TcCLB.511135.20:mRNA-p1-CDS1,TcCLB.511135.30:mRNA-p1-CDS1,TcCLB…
TcChr10-S	436474	438474	origins	CDS	ID=TcCLB.508787.10:mRNA-p1-CDS1;Parent=TcCLB.508787.10:mRNA;gene_id=TcCLB.508787.10;protein_source_id=TcCLB.508787.10:mRNA-p1
TcChr10-S	436474	438474	origins	exon	ID=exon_TcCLB.508787.10:mRNA-E1;Parent=TcCLB.508787.10:mRNA;gene_id=TcCLB.508787.10
TcChr10-S	436474	438474	origins	mRNA	ID=TcCLB.508787.10:mRNA;Parent=TcCLB.508787.10;description=hypothetical
TcChr10-S	436474	438474	origins	protein_coding_gene	ID=TcCLB.508787.10;description=hypothetical
TcChr10-S	436474	438474	origins	CDS	ID=TcCLB.508787.14:mRNA-p1-CDS1;Parent=TcCLB.508787.14:mRNA;gene_id=TcCLB.508787.14;protein_source_id=TcCLB.508787.14:mRNA-p1
TcChr10-S	436474	438474	origins	exon	ID=exon_TcCLB.508787.14:mRNA-E1;Parent=TcCLB.508787.14:mRNA;gene_id=TcCLB.508787.14
TcChr10-S	436474	438474	origins	mRNA	ID=TcCLB.508787.14:mRNA;Parent=TcCLB.508787.14;description=hypothetical
TcChr10-S	436474	438474	origins	protein_coding_gene	ID=TcCLB.508787.14;description=hypothetical
TcChr10-S	436474	438474	origins	CDS	ID=TcCLB.508787.20:mRNA-p1-CDS1;Parent=TcCLB.508787.20:mRNA;gene_id=TcCLB.508787.20;protein_source_id=TcCLB.508787.20:mRNA-p1
TcChr10-S	436474	438474	origins	exon	ID=exon_TcCLB.508787.20:mRNA-E1;Parent=TcCLB.508787.20:mRNA;gene_id=TcCLB.508787.20
TcChr10-S	436474	438474	origins	mRNA	ID=TcCLB.508787.20:mRNA;Parent=TcCLB.508787.20;description=hypothetical
TcChr10-S	436474	438474	origins	protein_coding_gene	ID=TcCLB.508787.20;description=hypothetical
TcChr10-S	436474	438474	origins	polycistron-CDS	ID=polycistron-CDS_6;contentCount=61;content=TcCLB.508781.20:mRNA-p1-CDS1,TcCLB.508781.30:mRNA-p1-CDS1,TcCLB.508781.40:mRNA-p1-CDS1,TcCLB.508781.60:mRNA-p1-CDS1,TcCLB.508781.70:mRNA-p1-CDS1,TcCLB.508781.80:mRNA-p1-CDS1,TcCLB.508781.90:mRNA-p1-CDS1,TcCLB.508781.110:mRNA-p1-CDS1,TcCLB.508781.120:mRNA-p1-CDS1,TcCLB.417797.9:mRNA-p1-CDS1,TcCLB.511135.20:mRNA-p1-CDS1,TcCLB.511135.30:mRNA-p1-CDS1,TcCLB…
TcChr10-S	456838	458838	origins	CDS	ID=TcCLB.511145.49:mRNA-p1-CDS1;Parent=TcCLB.511145.49:mRNA;gene_id=TcCLB.511145.49;protein_source_id=TcCLB.511145.49:mRNA-p1
TcChr10-S	456838	458838	origins	exon	ID=exon_TcCLB.511145.49:mRNA-E1;Parent=TcCLB.511145.49:mRNA;gene_id=TcCLB.511145.49
TcChr10-S	456838	458838	origins	mRNA	ID=TcCLB.511145.49:mRNA;Parent=TcCLB.511145.49;description=GPI
TcChr10-S	456838	458838	origins	protein_coding_gene	ID=TcCLB.511145.49;description=GPI
TcChr10-S	456838	458838	origins	CDS	ID=TcCLB.511145.50:mRNA-p1-CDS1;Parent=TcCLB.511145.50:mRNA;gene_id=TcCLB.511145.50;protein_source_id=TcCLB.511145.50:mRNA-p1
TcChr10-S	456838	458838	origins	exon	ID=exon_TcCLB.511145.50:mRNA-E1;Parent=TcCLB.511145.50:mRNA;gene_id=TcCLB.511145.50
TcChr10-S	456838	458838	origins	mRNA	ID=TcCLB.511145.50:mRNA;Parent=TcCLB.511145.50;Note=3.6.3.14
TcChr10-S	456838	458838	origins	protein_coding_gene	ID=TcCLB.511145.50;description=vacuolar
TcChr10-S	456838	458838	origins	CDS	ID=TcCLB.511145.60:mRNA-p1-CDS1;Parent=TcCLB.511145.60:mRNA;gene_id=TcCLB.511145.60;protein_source_id=TcCLB.511145.60:mRNA-p1
TcChr10-S	456838	458838	origins	exon	ID=exon_TcCLB.511145.60:mRNA-E1;Parent=TcCLB.511145.60:mRNA;gene_id=TcCLB.511145.60
TcChr10-S	456838	458838	origins	mRNA	ID=TcCLB.511145.60:mRNA;Parent=TcCLB.511145.60;Note=3.6.3.14
TcChr10-S	456838	458838	origins	protein_coding_gene	ID=TcCLB.511145.60;Name=ATPF1G;description=ATP
TcChr10-S	456838	458838	origins	polycistron-CDS	ID=polycistron-CDS_6;contentCount=61;content=TcCLB.508781.20:mRNA-p1-CDS1,TcCLB.508781.30:mRNA-p1-CDS1,TcCLB.508781.40:mRNA-p1-CDS1,TcCLB.508781.60:mRNA-p1-CDS1,TcCLB.508781.70:mRNA-p1-CDS1,TcCLB.508781.80:mRNA-p1-CDS1,TcCLB.508781.90:mRNA-p1-CDS1,TcCLB.508781.110:mRNA-p1-CDS1,TcCLB.508781.120:mRNA-p1-CDS1,TcCLB.417797.9:mRNA-p1-CDS1,TcCLB.511135.20:mRNA-p1-CDS1,TcCLB.511135.30:mRNA-p1-CDS1,TcCLB…
TcChr10-S	470644	472644	origins	CDS	ID=TcCLB.504229.70:mRNA-p1-CDS1;Parent=TcCLB.504229.70:mRNA;gene_id=TcCLB.504229.70;protein_source_id=TcCLB.504229.70:mRNA-p1
TcChr10-S	470644	472644	origins	exon	ID=exon_TcCLB.504229.70:mRNA-E1;Parent=TcCLB.504229.70:mRNA;gene_id=TcCLB.504229.70
TcChr10-S	470644	472644	origins	mRNA	ID=TcCLB.504229.70:mRNA;Parent=TcCLB.504229.70;description=retrotransposon
TcChr10-S	470644	472644	origins	protein_coding_gene	ID=TcCLB.504229.70;description=retrotransposon
TcChr10-S	470644	472644	origins	polycistron-CDS	ID=polycistron-CDS_7;contentCount=5;content=TcCLB.504229.70:mRNA-p1-CDS1,TcCLB.504229.37:mRNA-p1-CDS1,TcCLB.504229.30:mRNA-p1-CDS1,TcCLB.504229.4:mRNA-p1-CDS1,TcCLB.503441.5:mRNA-p1-CDS1
TcChr10-S	482952	484952	origins	CDS	ID=TcCLB.504229.37:mRNA-p1-CDS1;Parent=TcCLB.504229.37:mRNA;gene_id=TcCLB.504229.37;protein_source_id=TcCLB.504229.37:mRNA-p1
TcChr10-S	482952	484952	origins	exon	ID=exon_TcCLB.504229.37:mRNA-E1;Parent=TcCLB.504229.37:mRNA;gene_id=TcCLB.504229.37
TcChr10-S	482952	484952	origins	mRNA	ID=TcCLB.504229.37:mRNA;Parent=TcCLB.504229.37;description=hypothetical
TcChr10-S	482952	484952	origins	protein_coding_gene	ID=TcCLB.504229.37;description=hypothetical
TcChr10-S	482952	484952	origins	CDS	ID=TcCLB.504229.30:mRNA-p1-CDS1;Parent=TcCLB.504229.30:mRNA;gene_id=TcCLB.504229.30;protein_source_id=TcCLB.504229.30:mRNA-p1
TcChr10-S	482952	484952	origins	exon	ID=exon_TcCLB.504229.30:mRNA-E1;Parent=TcCLB.504229.30:mRNA;gene_id=TcCLB.504229.30
TcChr10-S	482952	484952	origins	mRNA	ID=TcCLB.504229.30:mRNA;Parent=TcCLB.504229.30;description=protein
TcChr10-S	482952	484952	origins	protein_coding_gene	ID=TcCLB.504229.30;description=protein
TcChr10-S	482952	484952	origins	polycistron-CDS	ID=polycistron-CDS_7;contentCount=5;content=TcCLB.504229.70:mRNA-p1-CDS1,TcCLB.504229.37:mRNA-p1-CDS1,TcCLB.504229.30:mRNA-p1-CDS1,TcCLB.504229.4:mRNA-p1-CDS1,TcCLB.503441.5:mRNA-p1-CDS1
TcChr11-S	17925	19925	origins	exon	ID=exon_TcCLB.510307.94:pseudogenic_transcript-E1;Parent=TcCLB.510307.94:pseudogenic_transcript;gene_id=TcCLB.510307.94
TcChr11-S	17925	19925	origins	pseudogene	ID=TcCLB.510307.94;description=ATP-dependent
TcChr11-S	17925	19925	origins	pseudogenic_transcript	ID=TcCLB.510307.94:pseudogenic_transcript;Parent=TcCLB.510307.94;description=ATP-dependent
TcChr11-S	17925	19925	origins	exon	ID=exon_TcCLB.510307.110:pseudogenic_transcript-E1;Parent=TcCLB.510307.110:pseudogenic_transcript;gene_id=TcCLB.510307.110
TcChr11-S	17925	19925	origins	pseudogene	ID=TcCLB.510307.110;description=hypothetical
TcChr11-S	17925	19925	origins	pseudogenic_transcript	ID=TcCLB.510307.110:pseudogenic_transcript;Parent=TcCLB.510307.110;description=hypothetical
TcChr11-S	17925	19925	origins	polycistron-CDS	ID=polycistron-CDS_8;contentCount=13;content=TcCLB.510307.10:mRNA-p1-CDS1,TcCLB.510307.200:mRNA-p1-CDS1,TcCLB.510307.210:mRNA-p1-CDS1,TcCLB.510307.220:mRNA-p1-CDS1,TcCLB.510307.230:mRNA-p1-CDS1,TcCLB.510307.240:mRNA-p1-CDS1,TcCLB.510307.284:mRNA-p1-CDS1,TcCLB.510307.330:mRNA-p1-CDS1,TcCLB.504887.10:mRNA-p1-CDS1,TcCLB.507243.9:mRNA-p1-CDS1,TcCLB.509349.20:mRNA-p1-CDS1,TcCLB.509349.30:mRNA-p1-CDS1,…
TcChr11-S	31052	33052	origins	exon	ID=exon_TcCLB.510307.191:pseudogenic_transcript-E1;Parent=TcCLB.510307.191:pseudogenic_transcript;gene_id=TcCLB.510307.191
TcChr11-S	31052	33052	origins	pseudogene	ID=TcCLB.510307.191;description=protein
TcChr11-S	31052	33052	origins	pseudogenic_transcript	ID=TcCLB.510307.191:pseudogenic_transcript;Parent=TcCLB.510307.191;description=protein
TcChr11-S	31052	33052	origins	polycistron-CDS	ID=polycistron-CDS_8;contentCount=13;content=TcCLB.510307.10:mRNA-p1-CDS1,TcCLB.510307.200:mRNA-p1-CDS1,TcCLB.510307.210:mRNA-p1-CDS1,TcCLB.510307.220:mRNA-p1-CDS1,TcCLB.510307.230:mRNA-p1-CDS1,TcCLB.510307.240:mRNA-p1-CDS1,TcCLB.510307.284:mRNA-p1-CDS1,TcCLB.510307.330:mRNA-p1-CDS1,TcCLB.504887.10:mRNA-p1-CDS1,TcCLB.507243.9:mRNA-p1-CDS1,TcCLB.509349.20:mRNA-p1-CDS1,TcCLB.509349.30:mRNA-p1-CDS1,…
TcChr11-S	46845	48845	origins	polycistron-CDS	ID=polycistron-CDS_8;contentCount=13;content=TcCLB.510307.10:mRNA-p1-CDS1,TcCLB.510307.200:mRNA-p1-CDS1,TcCLB.510307.210:mRNA-p1-CDS1,TcCLB.510307.220:mRNA-p1-CDS1,TcCLB.510307.230:mRNA-p1-CDS1,TcCLB.510307.240:mRNA-p1-CDS1,TcCLB.510307.284:mRNA-p1-CDS1,TcCLB.510307.330:mRNA-p1-CDS1,TcCLB.504887.10:mRNA-p1-CDS1,TcCLB.507243.9:mRNA-p1-CDS1,TcCLB.509349.20:mRNA-p1-CDS1,TcCLB.509349.30:mRNA-p1-CDS1,…
TcChr11-S	46845	48845	origins	CDS	ID=TcCLB.510307.230:mRNA-p1-CDS1;Parent=TcCLB.510307.230:mRNA;gene_id=TcCLB.510307.230;protein_source_id=TcCLB.510307.230:mRNA-p1
TcChr11-S	46845	48845	origins	exon	ID=exon_TcCLB.510307.230:mRNA-E1;Parent=TcCLB.510307.230:mRNA;gene_id=TcCLB.510307.230
TcChr11-S	46845	48845	origins	mRNA	ID=TcCLB.510307.230:mRNA;Parent=TcCLB.510307.230;description=trans-sialidase%2C
TcChr11-S	46845	48845	origins	protein_coding_gene	ID=TcCLB.510307.230;description=trans-sialidase%2C
TcChr11-S	52024	54024	origins	CDS	ID=TcCLB.510307.240:mRNA-p1-CDS1;Parent=TcCLB.510307.240:mRNA;gene_id=TcCLB.510307.240;protein_source_id=TcCLB.510307.240:mRNA-p1
TcChr11-S	52024	54024	origins	exon	ID=exon_TcCLB.510307.240:mRNA-E1;Parent=TcCLB.510307.240:mRNA;gene_id=TcCLB.510307.240
TcChr11-S	52024	54024	origins	mRNA	ID=TcCLB.510307.240:mRNA;Parent=TcCLB.510307.240;description=trans-sialidase%2C
TcChr11-S	52024	54024	origins	protein_coding_gene	ID=TcCLB.510307.240;description=trans-sialidase%2C
TcChr11-S	52024	54024	origins	polycistron-CDS	ID=polycistron-CDS_8;contentCount=13;content=TcCLB.510307.10:mRNA-p1-CDS1,TcCLB.510307.200:mRNA-p1-CDS1,TcCLB.510307.210:mRNA-p1-CDS1,TcCLB.510307.220:mRNA-p1-CDS1,TcCLB.510307.230:mRNA-p1-CDS1,TcCLB.510307.240:mRNA-p1-CDS1,TcCLB.510307.284:mRNA-p1-CDS1,TcCLB.510307.330:mRNA-p1-CDS1,TcCLB.504887.10:mRNA-p1-CDS1,TcCLB.507243.9:mRNA-p1-CDS1,TcCLB.509349.20:mRNA-p1-CDS1,TcCLB.509349.30:mRNA-p1-CDS1,…
TcChr11-S	137064	139064	origins	CDS	ID=TcCLB.506605.229:mRNA-p1-CDS1;Parent=TcCLB.506605.229:mRNA;gene_id=TcCLB.506605.229;protein_source_id=TcCLB.506605.229:mRNA-p1
TcChr11-S	137064	139064	origins	exon	ID=exon_TcCLB.506605.229:mRNA-E1;Parent=TcCLB.506605.229:mRNA;gene_id=TcCLB.506605.229
TcChr11-S	137064	139064	origins	mRNA	ID=TcCLB.506605.229:mRNA;Parent=TcCLB.506605.229;description=J
TcChr11-S	137064	139064	origins	protein_coding_gene	ID=TcCLB.506605.229;Name=JBP2;description=J
TcChr11-S	137064	139064	origins	polycistron-CDS	ID=polycistron-CDS_9;contentCount=49;content=TcCLB.510167.29:mRNA-p1-CDS1,TcCLB.510167.20:mRNA-p1-CDS1,TcCLB.510167.10:mRNA-p1-CDS1,TcCLB.510167.4:mRNA-p1-CDS1,TcCLB.506605.229:mRNA-p1-CDS1,TcCLB.506605.220:mRNA-p1-CDS1,TcCLB.506605.214:mRNA-p1-CDS1,TcCLB.506605.210:mRNA-p1-CDS1,TcCLB.506605.200:mRNA-p1-CDS1,TcCLB.506605.194:mRNA-p1-CDS1,TcCLB.506605.190:mRNA-p1-CDS1,TcCLB.506605.180:mRNA-p1-CDS1…
TcChr11-S	142928	144928	origins	CDS	ID=TcCLB.506605.210:mRNA-p1-CDS1;Parent=TcCLB.506605.210:mRNA;gene_id=TcCLB.506605.210;protein_source_id=TcCLB.506605.210:mRNA-p1
TcChr11-S	142928	144928	origins	exon	ID=exon_TcCLB.506605.210:mRNA-E1;Parent=TcCLB.506605.210:mRNA;gene_id=TcCLB.506605.210
TcChr11-S	142928	144928	origins	mRNA	ID=TcCLB.506605.210:mRNA;Parent=TcCLB.506605.210;description=leucine-rich
TcChr11-S	142928	144928	origins	protein_coding_gene	ID=TcCLB.506605.210;description=leucine-rich
TcChr11-S	142928	144928	origins	CDS	ID=TcCLB.506605.200:mRNA-p1-CDS1;Parent=TcCLB.506605.200:mRNA;gene_id=TcCLB.506605.200;protein_source_id=TcCLB.506605.200:mRNA-p1
TcChr11-S	142928	144928	origins	exon	ID=exon_TcCLB.506605.200:mRNA-E1;Parent=TcCLB.506605.200:mRNA;gene_id=TcCLB.506605.200
TcChr11-S	142928	144928	origins	mRNA	ID=TcCLB.506605.200:mRNA;Parent=TcCLB.506605.200;description=hypothetical
TcChr11-S	142928	144928	origins	protein_coding_gene	ID=TcCLB.506605.200;description=hypothetical
TcChr11-S	142928	144928	origins	polycistron-CDS	ID=polycistron-CDS_9;contentCount=49;content=TcCLB.510167.29:mRNA-p1-CDS1,TcCLB.510167.20:mRNA-p1-CDS1,TcCLB.510167.10:mRNA-p1-CDS1,TcCLB.510167.4:mRNA-p1-CDS1,TcCLB.506605.229:mRNA-p1-CDS1,TcCLB.506605.220:mRNA-p1-CDS1,TcCLB.506605.214:mRNA-p1-CDS1,TcCLB.506605.210:mRNA-p1-CDS1,TcCLB.506605.200:mRNA-p1-CDS1,TcCLB.506605.194:mRNA-p1-CDS1,TcCLB.506605.190:mRNA-p1-CDS1,TcCLB.506605.180:mRNA-p1-CDS1…
TcChr11-S	147088	149088	origins	CDS	ID=TcCLB.506605.194:mRNA-p1-CDS1;Parent=TcCLB.506605.194:mRNA;gene_id=TcCLB.506605.194;protein_source_id=TcCLB.506605.194:mRNA-p1
TcChr11-S	147088	149088	origins	exon	ID=exon_TcCLB.506605.194:mRNA-E1;Parent=TcCLB.506605.194:mRNA;gene_id=TcCLB.506605.194
TcChr11-S	147088	149088	origins	mRNA	ID=TcCLB.506605.194:mRNA;Parent=TcCLB.506605.194;description=hypothetical
TcChr11-S	147088	149088	origins	protein_coding_gene	ID=TcCLB.506605.194;description=hypothetical
TcChr11-S	147088	149088	origins	CDS	ID=TcCLB.506605.190:mRNA-p1-CDS1;Parent=TcCLB.506605.190:mRNA;gene_id=TcCLB.506605.190;protein_source_id=TcCLB.506605.190:mRNA-p1
TcChr11-S	147088	149088	origins	exon	ID=exon_TcCLB.506605.190:mRNA-E1;Parent=TcCLB.506605.190:mRNA;gene_id=TcCLB.506605.190
TcChr11-S	147088	149088	origins	mRNA	ID=TcCLB.506605.190:mRNA;Parent=TcCLB.506605.190;description=Calponin
TcChr11-S	147088	149088	origins	protein_coding_gene	ID=TcCLB.506605.190;description=Calponin
TcChr11-S	147088	149088	origins	polycistron-CDS	ID=polycistron-CDS_9;contentCount=49;content=TcCLB.510167.29:mRNA-p1-CDS1,TcCLB.510167.20:mRNA-p1-CDS1,TcCLB.510167.10:mRNA-p1-CDS1,TcCLB.510167.4:mRNA-p1-CDS1,TcCLB.506605.229:mRNA-p1-CDS1,TcCLB.506605.220:mRNA-p1-CDS1,TcCLB.506605.214:mRNA-p1-CDS1,TcCLB.506605.210:mRNA-p1-CDS1,TcCLB.506605.200:mRNA-p1-CDS1,TcCLB.506605.194:mRNA-p1-CDS1,TcCLB.506605.190:mRNA-p1-CDS1,TcCLB.506605.180:mRNA-p1-CDS1…
TcChr11-S	152109	154109	origins	CDS	ID=TcCLB.506605.180:mRNA-p1-CDS1;Parent=TcCLB.506605.180:mRNA;gene_id=TcCLB.506605.180;protein_source_id=TcCLB.506605.180:mRNA-p1
TcChr11-S	152109	154109	origins	exon	ID=exon_TcCLB.506605.180:mRNA-E1;Parent=TcCLB.506605.180:mRNA;gene_id=TcCLB.506605.180
TcChr11-S	152109	154109	origins	mRNA	ID=TcCLB.506605.180:mRNA;Parent=TcCLB.506605.180;description=hypothetical
TcChr11-S	152109	154109	origins	protein_coding_gene	ID=TcCLB.506605.180;description=hypothetical
TcChr11-S	152109	154109	origins	CDS	ID=TcCLB.506605.174:mRNA-p1-CDS1;Parent=TcCLB.506605.174:mRNA;gene_id=TcCLB.506605.174;protein_source_id=TcCLB.506605.174:mRNA-p1
TcChr11-S	152109	154109	origins	exon	ID=exon_TcCLB.506605.174:mRNA-E1;Parent=TcCLB.506605.174:mRNA;gene_id=TcCLB.506605.174
TcChr11-S	152109	154109	origins	mRNA	ID=TcCLB.506605.174:mRNA;Parent=TcCLB.506605.174;description=Cornifin
TcChr11-S	152109	154109	origins	protein_coding_gene	ID=TcCLB.506605.174;description=Cornifin
TcChr11-S	152109	154109	origins	polycistron-CDS	ID=polycistron-CDS_9;contentCount=49;content=TcCLB.510167.29:mRNA-p1-CDS1,TcCLB.510167.20:mRNA-p1-CDS1,TcCLB.510167.10:mRNA-p1-CDS1,TcCLB.510167.4:mRNA-p1-CDS1,TcCLB.506605.229:mRNA-p1-CDS1,TcCLB.506605.220:mRNA-p1-CDS1,TcCLB.506605.214:mRNA-p1-CDS1,TcCLB.506605.210:mRNA-p1-CDS1,TcCLB.506605.200:mRNA-p1-CDS1,TcCLB.506605.194:mRNA-p1-CDS1,TcCLB.506605.190:mRNA-p1-CDS1,TcCLB.506605.180:mRNA-p1-CDS1…
TcChr11-S	155296	157296	origins	CDS	ID=TcCLB.506605.170:mRNA-p1-CDS1;Parent=TcCLB.506605.170:mRNA;gene_id=TcCLB.506605.170;protein_source_id=TcCLB.506605.170:mRNA-p1
TcChr11-S	155296	157296	origins	exon	ID=exon_TcCLB.506605.170:mRNA-E1;Parent=TcCLB.506605.170:mRNA;gene_id=TcCLB.506605.170
TcChr11-S	155296	157296	origins	mRNA	ID=TcCLB.506605.170:mRNA;Parent=TcCLB.506605.170;description=inosine-guanine
TcChr11-S	155296	157296	origins	protein_coding_gene	ID=TcCLB.506605.170;Name=IG-NH;description=inosine-guanine
TcChr11-S	155296	157296	origins	polycistron-CDS	ID=polycistron-CDS_9;contentCount=49;content=TcCLB.510167.29:mRNA-p1-CDS1,TcCLB.510167.20:mRNA-p1-CDS1,TcCLB.510167.10:mRNA-p1-CDS1,TcCLB.510167.4:mRNA-p1-CDS1,TcCLB.506605.229:mRNA-p1-CDS1,TcCLB.506605.220:mRNA-p1-CDS1,TcCLB.506605.214:mRNA-p1-CDS1,TcCLB.506605.210:mRNA-p1-CDS1,TcCLB.506605.200:mRNA-p1-CDS1,TcCLB.506605.194:mRNA-p1-CDS1,TcCLB.506605.190:mRNA-p1-CDS1,TcCLB.506605.180:mRNA-p1-CDS1…
TcChr11-S	160010	162010	origins	CDS	ID=TcCLB.506605.150:mRNA-p1-CDS1;Parent=TcCLB.506605.150:mRNA;gene_id=TcCLB.506605.150;protein_source_id=TcCLB.506605.150:mRNA-p1
TcChr11-S	160010	162010	origins	exon	ID=exon_TcCLB.506605.150:mRNA-E1;Parent=TcCLB.506605.150:mRNA;gene_id=TcCLB.506605.150
TcChr11-S	160010	162010	origins	mRNA	ID=TcCLB.506605.150:mRNA;Parent=TcCLB.506605.150;description=60S
TcChr11-S	160010	162010	origins	protein_coding_gene	ID=TcCLB.506605.150;Name=J35;description=60S
TcChr11-S	160010	162010	origins	CDS	ID=TcCLB.506605.139:mRNA-p1-CDS1;Parent=TcCLB.506605.139:mRNA;gene_id=TcCLB.506605.139;protein_source_id=TcCLB.506605.139:mRNA-p1
TcChr11-S	160010	162010	origins	exon	ID=exon_TcCLB.506605.139:mRNA-E1;Parent=TcCLB.506605.139:mRNA;gene_id=TcCLB.506605.139
TcChr11-S	160010	162010	origins	mRNA	ID=TcCLB.506605.139:mRNA;Parent=TcCLB.506605.139;description=hypothetical
TcChr11-S	160010	162010	origins	protein_coding_gene	ID=TcCLB.506605.139;description=hypothetical
TcChr11-S	160010	162010	origins	polycistron-CDS	ID=polycistron-CDS_9;contentCount=49;content=TcCLB.510167.29:mRNA-p1-CDS1,TcCLB.510167.20:mRNA-p1-CDS1,TcCLB.510167.10:mRNA-p1-CDS1,TcCLB.510167.4:mRNA-p1-CDS1,TcCLB.506605.229:mRNA-p1-CDS1,TcCLB.506605.220:mRNA-p1-CDS1,TcCLB.506605.214:mRNA-p1-CDS1,TcCLB.506605.210:mRNA-p1-CDS1,TcCLB.506605.200:mRNA-p1-CDS1,TcCLB.506605.194:mRNA-p1-CDS1,TcCLB.506605.190:mRNA-p1-CDS1,TcCLB.506605.180:mRNA-p1-CDS1…
TcChr11-S	167330	169330	origins	CDS	ID=TcCLB.506605.100:mRNA-p1-CDS1;Parent=TcCLB.506605.100:mRNA;gene_id=TcCLB.506605.100;protein_source_id=TcCLB.506605.100:mRNA-p1
TcChr11-S	167330	169330	origins	exon	ID=exon_TcCLB.506605.100:mRNA-E1;Parent=TcCLB.506605.100:mRNA;gene_id=TcCLB.506605.100
TcChr11-S	167330	169330	origins	mRNA	ID=TcCLB.506605.100:mRNA;Parent=TcCLB.506605.100;description=hypothetical
TcChr11-S	167330	169330	origins	protein_coding_gene	ID=TcCLB.506605.100;description=hypothetical
TcChr11-S	167330	169330	origins	polycistron-CDS	ID=polycistron-CDS_9;contentCount=49;content=TcCLB.510167.29:mRNA-p1-CDS1,TcCLB.510167.20:mRNA-p1-CDS1,TcCLB.510167.10:mRNA-p1-CDS1,TcCLB.510167.4:mRNA-p1-CDS1,TcCLB.506605.229:mRNA-p1-CDS1,TcCLB.506605.220:mRNA-p1-CDS1,TcCLB.506605.214:mRNA-p1-CDS1,TcCLB.506605.210:mRNA-p1-CDS1,TcCLB.506605.200:mRNA-p1-CDS1,TcCLB.506605.194:mRNA-p1-CDS1,TcCLB.506605.190:mRNA-p1-CDS1,TcCLB.506605.180:mRNA-p1-CDS1…
TcChr11-S	177001	179001	origins	CDS	ID=TcCLB.506605.70:mRNA-p1-CDS1;Parent=TcCLB.506605.70:mRNA;gene_id=TcCLB.506605.70;protein_source_id=TcCLB.506605.70:mRNA-p1
TcChr11-S	177001	179001	origins	exon	ID=exon_TcCLB.506605.70:mRNA-E1;Parent=TcCLB.506605.70:mRNA;gene_id=TcCLB.506605.70
TcChr11-S	177001	179001	origins	mRNA	ID=TcCLB.506605.70:mRNA;Parent=TcCLB.506605.70;description=hypothetical
TcChr11-S	177001	179001	origins	protein_coding_gene	ID=TcCLB.506605.70;description=hypothetical
TcChr11-S	177001	179001	origins	polycistron-CDS	ID=polycistron-CDS_9;contentCount=49;content=TcCLB.510167.29:mRNA-p1-CDS1,TcCLB.510167.20:mRNA-p1-CDS1,TcCLB.510167.10:mRNA-p1-CDS1,TcCLB.510167.4:mRNA-p1-CDS1,TcCLB.506605.229:mRNA-p1-CDS1,TcCLB.506605.220:mRNA-p1-CDS1,TcCLB.506605.214:mRNA-p1-CDS1,TcCLB.506605.210:mRNA-p1-CDS1,TcCLB.506605.200:mRNA-p1-CDS1,TcCLB.506605.194:mRNA-p1-CDS1,TcCLB.506605.190:mRNA-p1-CDS1,TcCLB.506605.180:mRNA-p1-CDS1…
TcChr11-S	187331	189331	origins	CDS	ID=TcCLB.506605.10:mRNA-p1-CDS1;Parent=TcCLB.506605.10:mRNA;gene_id=TcCLB.506605.10;protein_source_id=TcCLB.506605.10:mRNA-p1
TcChr11-S	187331	189331	origins	exon	ID=exon_TcCLB.506605.10:mRNA-E1;Parent=TcCLB.506605.10:mRNA;gene_id=TcCLB.506605.10
TcChr11-S	187331	189331	origins	mRNA	ID=TcCLB.506605.10:mRNA;Parent=TcCLB.506605.10;description=Nucleus
TcChr11-S	187331	189331	origins	protein_coding_gene	ID=TcCLB.506605.10;Name=NuSAP3;description=Nucleus
TcChr11-S	187331	189331	origins	polycistron-CDS	ID=polycistron-CDS_9;contentCount=49;content=TcCLB.510167.29:mRNA-p1-CDS1,TcCLB.510167.20:mRNA-p1-CDS1,TcCLB.510167.10:mRNA-p1-CDS1,TcCLB.510167.4:mRNA-p1-CDS1,TcCLB.506605.229:mRNA-p1-CDS1,TcCLB.506605.220:mRNA-p1-CDS1,TcCLB.506605.214:mRNA-p1-CDS1,TcCLB.506605.210:mRNA-p1-CDS1,TcCLB.506605.200:mRNA-p1-CDS1,TcCLB.506605.194:mRNA-p1-CDS1,TcCLB.506605.190:mRNA-p1-CDS1,TcCLB.506605.180:mRNA-p1-CDS1…
TcChr11-S	192790	194790	origins	CDS	ID=TcCLB.504213.140:mRNA-p1-CDS1;Parent=TcCLB.504213.140:mRNA;gene_id=TcCLB.504213.140;protein_source_id=TcCLB.504213.140:mRNA-p1
TcChr11-S	192790	194790	origins	exon	ID=exon_TcCLB.504213.140:mRNA-E1;Parent=TcCLB.504213.140:mRNA;gene_id=TcCLB.504213.140
TcChr11-S	192790	194790	origins	mRNA	ID=TcCLB.504213.140:mRNA;Parent=TcCLB.504213.140;description=NAD
TcChr11-S	192790	194790	origins	protein_coding_gene	ID=TcCLB.504213.140;description=NAD
TcChr11-S	192790	194790	origins	polycistron-CDS	ID=polycistron-CDS_9;contentCount=49;content=TcCLB.510167.29:mRNA-p1-CDS1,TcCLB.510167.20:mRNA-p1-CDS1,TcCLB.510167.10:mRNA-p1-CDS1,TcCLB.510167.4:mRNA-p1-CDS1,TcCLB.506605.229:mRNA-p1-CDS1,TcCLB.506605.220:mRNA-p1-CDS1,TcCLB.506605.214:mRNA-p1-CDS1,TcCLB.506605.210:mRNA-p1-CDS1,TcCLB.506605.200:mRNA-p1-CDS1,TcCLB.506605.194:mRNA-p1-CDS1,TcCLB.506605.190:mRNA-p1-CDS1,TcCLB.506605.180:mRNA-p1-CDS1…
TcChr11-S	216195	218195	origins	CDS	ID=TcCLB.504213.60:mRNA-p1-CDS1;Parent=TcCLB.504213.60:mRNA;gene_id=TcCLB.504213.60;protein_source_id=TcCLB.504213.60:mRNA-p1
TcChr11-S	216195	218195	origins	exon	ID=exon_TcCLB.504213.60:mRNA-E1;Parent=TcCLB.504213.60:mRNA;gene_id=TcCLB.504213.60
TcChr11-S	216195	218195	origins	mRNA	ID=TcCLB.504213.60:mRNA;Parent=TcCLB.504213.60;description=hypothetical
TcChr11-S	216195	218195	origins	protein_coding_gene	ID=TcCLB.504213.60;description=hypothetical
TcChr11-S	216195	218195	origins	CDS	ID=TcCLB.504213.50:mRNA-p1-CDS1;Parent=TcCLB.504213.50:mRNA;gene_id=TcCLB.504213.50;protein_source_id=TcCLB.504213.50:mRNA-p1
TcChr11-S	216195	218195	origins	exon	ID=exon_TcCLB.504213.50:mRNA-E1;Parent=TcCLB.504213.50:mRNA;gene_id=TcCLB.504213.50
TcChr11-S	216195	218195	origins	mRNA	ID=TcCLB.504213.50:mRNA;Parent=TcCLB.504213.50;description=hypothetical
TcChr11-S	216195	218195	origins	protein_coding_gene	ID=TcCLB.504213.50;description=hypothetical
TcChr11-S	216195	218195	origins	polycistron-CDS	ID=polycistron-CDS_9;contentCount=49;content=TcCLB.510167.29:mRNA-p1-CDS1,TcCLB.510167.20:mRNA-p1-CDS1,TcCLB.510167.10:mRNA-p1-CDS1,TcCLB.510167.4:mRNA-p1-CDS1,TcCLB.506605.229:mRNA-p1-CDS1,TcCLB.506605.220:mRNA-p1-CDS1,TcCLB.506605.214:mRNA-p1-CDS1,TcCLB.506605.210:mRNA-p1-CDS1,TcCLB.506605.200:mRNA-p1-CDS1,TcCLB.506605.194:mRNA-p1-CDS1,TcCLB.506605.190:mRNA-p1-CDS1,TcCLB.506605.180:mRNA-p1-CDS1…
TcChr11-S	226530	228530	origins	CDS	ID=TcCLB.504213.10:mRNA-p1-CDS1;Parent=TcCLB.504213.10:mRNA;gene_id=TcCLB.504213.10;protein_source_id=TcCLB.504213.10:mRNA-p1
TcChr11-S	226530	228530	origins	exon	ID=exon_TcCLB.504213.10:mRNA-E1;Parent=TcCLB.504213.10:mRNA;gene_id=TcCLB.504213.10
TcChr11-S	226530	228530	origins	mRNA	ID=TcCLB.504213.10:mRNA;Parent=TcCLB.504213.10;description=Iguana/Dzip1-like
TcChr11-S	226530	228530	origins	protein_coding_gene	ID=TcCLB.504213.10;description=Iguana/Dzip1-like
TcChr11-S	226530	228530	origins	polycistron-CDS	ID=polycistron-CDS_9;contentCount=49;content=TcCLB.510167.29:mRNA-p1-CDS1,TcCLB.510167.20:mRNA-p1-CDS1,TcCLB.510167.10:mRNA-p1-CDS1,TcCLB.510167.4:mRNA-p1-CDS1,TcCLB.506605.229:mRNA-p1-CDS1,TcCLB.506605.220:mRNA-p1-CDS1,TcCLB.506605.214:mRNA-p1-CDS1,TcCLB.506605.210:mRNA-p1-CDS1,TcCLB.506605.200:mRNA-p1-CDS1,TcCLB.506605.194:mRNA-p1-CDS1,TcCLB.506605.190:mRNA-p1-CDS1,TcCLB.506605.180:mRNA-p1-CDS1…
TcChr11-S	235532	237532	origins	CDS	ID=TcCLB.508089.30:mRNA-p1-CDS1;Parent=TcCLB.508089.30:mRNA;gene_id=TcCLB.508089.30;protein_source_id=TcCLB.508089.30:mRNA-p1
TcChr11-S	235532	237532	origins	exon	ID=exon_TcCLB.508089.30:mRNA-E1;Parent=TcCLB.508089.30:mRNA;gene_id=TcCLB.508089.30
TcChr11-S	235532	237532	origins	mRNA	ID=TcCLB.508089.30:mRNA;Parent=TcCLB.508089.30;description=N-terminal
TcChr11-S	235532	237532	origins	protein_coding_gene	ID=TcCLB.508089.30;Name=NUDC1;description=N-terminal
TcChr11-S	235532	237532	origins	CDS	ID=TcCLB.508089.20:mRNA-p1-CDS1;Parent=TcCLB.508089.20:mRNA;gene_id=TcCLB.508089.20;protein_source_id=TcCLB.508089.20:mRNA-p1
TcChr11-S	235532	237532	origins	exon	ID=exon_TcCLB.508089.20:mRNA-E1;Parent=TcCLB.508089.20:mRNA;gene_id=TcCLB.508089.20
TcChr11-S	235532	237532	origins	mRNA	ID=TcCLB.508089.20:mRNA;Parent=TcCLB.508089.20;description=UDP-glucoronosyl
TcChr11-S	235532	237532	origins	protein_coding_gene	ID=TcCLB.508089.20;description=UDP-glucoronosyl
TcChr11-S	235532	237532	origins	polycistron-CDS	ID=polycistron-CDS_9;contentCount=49;content=TcCLB.510167.29:mRNA-p1-CDS1,TcCLB.510167.20:mRNA-p1-CDS1,TcCLB.510167.10:mRNA-p1-CDS1,TcCLB.510167.4:mRNA-p1-CDS1,TcCLB.506605.229:mRNA-p1-CDS1,TcCLB.506605.220:mRNA-p1-CDS1,TcCLB.506605.214:mRNA-p1-CDS1,TcCLB.506605.210:mRNA-p1-CDS1,TcCLB.506605.200:mRNA-p1-CDS1,TcCLB.506605.194:mRNA-p1-CDS1,TcCLB.506605.190:mRNA-p1-CDS1,TcCLB.506605.180:mRNA-p1-CDS1…
TcChr11-S	261992	263992	origins	CDS	ID=TcCLB.506661.160:mRNA-p1-CDS1;Parent=TcCLB.506661.160:mRNA;gene_id=TcCLB.506661.160;protein_source_id=TcCLB.506661.160:mRNA-p1
TcChr11-S	261992	263992	origins	exon	ID=exon_TcCLB.506661.160:mRNA-E1;Parent=TcCLB.506661.160:mRNA;gene_id=TcCLB.506661.160
TcChr11-S	261992	263992	origins	mRNA	ID=TcCLB.506661.160:mRNA;Parent=TcCLB.506661.160;description=Enriched
TcChr11-S	261992	263992	origins	protein_coding_gene	ID=TcCLB.506661.160;description=Enriched
TcChr11-S	261992	263992	origins	CDS	ID=TcCLB.506661.150:mRNA-p1-CDS1;Parent=TcCLB.506661.150:mRNA;gene_id=TcCLB.506661.150;protein_source_id=TcCLB.506661.150:mRNA-p1
TcChr11-S	261992	263992	origins	exon	ID=exon_TcCLB.506661.150:mRNA-E1;Parent=TcCLB.506661.150:mRNA;gene_id=TcCLB.506661.150
TcChr11-S	261992	263992	origins	mRNA	ID=TcCLB.506661.150:mRNA;Parent=TcCLB.506661.150;description=hypothetical
TcChr11-S	261992	263992	origins	protein_coding_gene	ID=TcCLB.506661.150;description=hypothetical
TcChr11-S	261992	263992	origins	CDS	ID=TcCLB.506661.140:mRNA-p1-CDS1;Parent=TcCLB.506661.140:mRNA;gene_id=TcCLB.506661.140;protein_source_id=TcCLB.506661.140:mRNA-p1
TcChr11-S	261992	263992	origins	exon	ID=exon_TcCLB.506661.140:mRNA-E1;Parent=TcCLB.506661.140:mRNA;gene_id=TcCLB.506661.140
TcChr11-S	261992	263992	origins	mRNA	ID=TcCLB.506661.140:mRNA;Parent=TcCLB.506661.140;description=hypothetical
TcChr11-S	261992	263992	origins	protein_coding_gene	ID=TcCLB.506661.140;description=hypothetical
TcChr11-S	261992	263992	origins	polycistron-CDS	ID=polycistron-CDS_11;contentCount=45;content=TcCLB.506661.170:mRNA-p1-CDS1,TcCLB.506661.160:mRNA-p1-CDS1,TcCLB.506661.150:mRNA-p1-CDS1,TcCLB.506661.140:mRNA-p1-CDS1,TcCLB.506661.130:mRNA-p1-CDS1,TcCLB.506661.120:mRNA-p1-CDS1,TcCLB.506661.110:mRNA-p1-CDS1,TcCLB.506661.100:mRNA-p1-CDS1,TcCLB.506661.90:mRNA-p1-CDS1,TcCLB.506661.80:mRNA-p1-CDS1,TcCLB.506661.70:mRNA-p1-CDS1,TcCLB.506661.60:mRNA-p1-CD…
TcChr11-S	268211	270211	origins	CDS	ID=TcCLB.506661.120:mRNA-p1-CDS1;Parent=TcCLB.506661.120:mRNA;gene_id=TcCLB.506661.120;protein_source_id=TcCLB.506661.120:mRNA-p1
TcChr11-S	268211	270211	origins	exon	ID=exon_TcCLB.506661.120:mRNA-E1;Parent=TcCLB.506661.120:mRNA;gene_id=TcCLB.506661.120
TcChr11-S	268211	270211	origins	mRNA	ID=TcCLB.506661.120:mRNA;Parent=TcCLB.506661.120;description=hypothetical
TcChr11-S	268211	270211	origins	protein_coding_gene	ID=TcCLB.506661.120;description=hypothetical
TcChr11-S	268211	270211	origins	CDS	ID=TcCLB.506661.110:mRNA-p1-CDS1;Parent=TcCLB.506661.110:mRNA;gene_id=TcCLB.506661.110;protein_source_id=TcCLB.506661.110:mRNA-p1
TcChr11-S	268211	270211	origins	exon	ID=exon_TcCLB.506661.110:mRNA-E1;Parent=TcCLB.506661.110:mRNA;gene_id=TcCLB.506661.110
TcChr11-S	268211	270211	origins	mRNA	ID=TcCLB.506661.110:mRNA;Parent=TcCLB.506661.110;description=WD
TcChr11-S	268211	270211	origins	protein_coding_gene	ID=TcCLB.506661.110;description=WD
TcChr11-S	268211	270211	origins	polycistron-CDS	ID=polycistron-CDS_11;contentCount=45;content=TcCLB.506661.170:mRNA-p1-CDS1,TcCLB.506661.160:mRNA-p1-CDS1,TcCLB.506661.150:mRNA-p1-CDS1,TcCLB.506661.140:mRNA-p1-CDS1,TcCLB.506661.130:mRNA-p1-CDS1,TcCLB.506661.120:mRNA-p1-CDS1,TcCLB.506661.110:mRNA-p1-CDS1,TcCLB.506661.100:mRNA-p1-CDS1,TcCLB.506661.90:mRNA-p1-CDS1,TcCLB.506661.80:mRNA-p1-CDS1,TcCLB.506661.70:mRNA-p1-CDS1,TcCLB.506661.60:mRNA-p1-CD…
TcChr11-S	275397	277397	origins	CDS	ID=TcCLB.506661.90:mRNA-p1-CDS1;Parent=TcCLB.506661.90:mRNA;gene_id=TcCLB.506661.90;protein_source_id=TcCLB.506661.90:mRNA-p1
TcChr11-S	275397	277397	origins	exon	ID=exon_TcCLB.506661.90:mRNA-E1;Parent=TcCLB.506661.90:mRNA;gene_id=TcCLB.506661.90
TcChr11-S	275397	277397	origins	mRNA	ID=TcCLB.506661.90:mRNA;Parent=TcCLB.506661.90;description=hypothetical
TcChr11-S	275397	277397	origins	protein_coding_gene	ID=TcCLB.506661.90;description=hypothetical
TcChr11-S	275397	277397	origins	polycistron-CDS	ID=polycistron-CDS_11;contentCount=45;content=TcCLB.506661.170:mRNA-p1-CDS1,TcCLB.506661.160:mRNA-p1-CDS1,TcCLB.506661.150:mRNA-p1-CDS1,TcCLB.506661.140:mRNA-p1-CDS1,TcCLB.506661.130:mRNA-p1-CDS1,TcCLB.506661.120:mRNA-p1-CDS1,TcCLB.506661.110:mRNA-p1-CDS1,TcCLB.506661.100:mRNA-p1-CDS1,TcCLB.506661.90:mRNA-p1-CDS1,TcCLB.506661.80:mRNA-p1-CDS1,TcCLB.506661.70:mRNA-p1-CDS1,TcCLB.506661.60:mRNA-p1-CD…
TcChr11-S	288024	290024	origins	CDS	ID=TcCLB.506661.30:mRNA-p1-CDS1;Parent=TcCLB.506661.30:mRNA;gene_id=TcCLB.506661.30;protein_source_id=TcCLB.506661.30:mRNA-p1
TcChr11-S	288024	290024	origins	exon	ID=exon_TcCLB.506661.30:mRNA-E1;Parent=TcCLB.506661.30:mRNA;gene_id=TcCLB.506661.30
TcChr11-S	288024	290024	origins	mRNA	ID=TcCLB.506661.30:mRNA;Parent=TcCLB.506661.30;description=fatty
TcChr11-S	288024	290024	origins	protein_coding_gene	ID=TcCLB.506661.30;description=fatty
TcChr11-S	288024	290024	origins	CDS	ID=TcCLB.506661.20:mRNA-p1-CDS1;Parent=TcCLB.506661.20:mRNA;gene_id=TcCLB.506661.20;protein_source_id=TcCLB.506661.20:mRNA-p1
TcChr11-S	288024	290024	origins	exon	ID=exon_TcCLB.506661.20:mRNA-E1;Parent=TcCLB.506661.20:mRNA;gene_id=TcCLB.506661.20
TcChr11-S	288024	290024	origins	mRNA	ID=TcCLB.506661.20:mRNA;Parent=TcCLB.506661.20;description=fatty
TcChr11-S	288024	290024	origins	protein_coding_gene	ID=TcCLB.506661.20;description=fatty
TcChr11-S	288024	290024	origins	polycistron-CDS	ID=polycistron-CDS_11;contentCount=45;content=TcCLB.506661.170:mRNA-p1-CDS1,TcCLB.506661.160:mRNA-p1-CDS1,TcCLB.506661.150:mRNA-p1-CDS1,TcCLB.506661.140:mRNA-p1-CDS1,TcCLB.506661.130:mRNA-p1-CDS1,TcCLB.506661.120:mRNA-p1-CDS1,TcCLB.506661.110:mRNA-p1-CDS1,TcCLB.506661.100:mRNA-p1-CDS1,TcCLB.506661.90:mRNA-p1-CDS1,TcCLB.506661.80:mRNA-p1-CDS1,TcCLB.506661.70:mRNA-p1-CDS1,TcCLB.506661.60:mRNA-p1-CD…
TcChr11-S	292970	294970	origins	CDS	ID=TcCLB.506661.10:mRNA-p1-CDS1;Parent=TcCLB.506661.10:mRNA;gene_id=TcCLB.506661.10;protein_source_id=TcCLB.506661.10:mRNA-p1
TcChr11-S	292970	294970	origins	exon	ID=exon_TcCLB.506661.10:mRNA-E1;Parent=TcCLB.506661.10:mRNA;gene_id=TcCLB.506661.10
TcChr11-S	292970	294970	origins	mRNA	ID=TcCLB.506661.10:mRNA;Parent=TcCLB.506661.10;description=fatty
TcChr11-S	292970	294970	origins	protein_coding_gene	ID=TcCLB.506661.10;description=fatty
TcChr11-S	292970	294970	origins	CDS	ID=TcCLB.510989.10:mRNA-p1-CDS1;Parent=TcCLB.510989.10:mRNA;gene_id=TcCLB.510989.10;protein_source_id=TcCLB.510989.10:mRNA-p1
TcChr11-S	292970	294970	origins	exon	ID=exon_TcCLB.510989.10:mRNA-E1;Parent=TcCLB.510989.10:mRNA;gene_id=TcCLB.510989.10
TcChr11-S	292970	294970	origins	mRNA	ID=TcCLB.510989.10:mRNA;Parent=TcCLB.510989.10;description=fatty
TcChr11-S	292970	294970	origins	protein_coding_gene	ID=TcCLB.510989.10;description=fatty
TcChr11-S	292970	294970	origins	polycistron-CDS	ID=polycistron-CDS_11;contentCount=45;content=TcCLB.506661.170:mRNA-p1-CDS1,TcCLB.506661.160:mRNA-p1-CDS1,TcCLB.506661.150:mRNA-p1-CDS1,TcCLB.506661.140:mRNA-p1-CDS1,TcCLB.506661.130:mRNA-p1-CDS1,TcCLB.506661.120:mRNA-p1-CDS1,TcCLB.506661.110:mRNA-p1-CDS1,TcCLB.506661.100:mRNA-p1-CDS1,TcCLB.506661.90:mRNA-p1-CDS1,TcCLB.506661.80:mRNA-p1-CDS1,TcCLB.506661.70:mRNA-p1-CDS1,TcCLB.506661.60:mRNA-p1-CD…
TcChr11-S	300275	302275	origins	CDS	ID=TcCLB.510989.20:mRNA-p1-CDS1;Parent=TcCLB.510989.20:mRNA;gene_id=TcCLB.510989.20;protein_source_id=TcCLB.510989.20:mRNA-p1
TcChr11-S	300275	302275	origins	exon	ID=exon_TcCLB.510989.20:mRNA-E1;Parent=TcCLB.510989.20:mRNA;gene_id=TcCLB.510989.20
TcChr11-S	300275	302275	origins	mRNA	ID=TcCLB.510989.20:mRNA;Parent=TcCLB.510989.20;description=hypothetical
TcChr11-S	300275	302275	origins	protein_coding_gene	ID=TcCLB.510989.20;description=hypothetical
TcChr11-S	300275	302275	origins	CDS	ID=TcCLB.510989.30:mRNA-p1-CDS1;Parent=TcCLB.510989.30:mRNA;gene_id=TcCLB.510989.30;protein_source_id=TcCLB.510989.30:mRNA-p1
TcChr11-S	300275	302275	origins	exon	ID=exon_TcCLB.510989.30:mRNA-E1;Parent=TcCLB.510989.30:mRNA;gene_id=TcCLB.510989.30
TcChr11-S	300275	302275	origins	mRNA	ID=TcCLB.510989.30:mRNA;Parent=TcCLB.510989.30;description=guanin
TcChr11-S	300275	302275	origins	protein_coding_gene	ID=TcCLB.510989.30;description=guanin
TcChr11-S	300275	302275	origins	polycistron-CDS	ID=polycistron-CDS_11;contentCount=45;content=TcCLB.506661.170:mRNA-p1-CDS1,TcCLB.506661.160:mRNA-p1-CDS1,TcCLB.506661.150:mRNA-p1-CDS1,TcCLB.506661.140:mRNA-p1-CDS1,TcCLB.506661.130:mRNA-p1-CDS1,TcCLB.506661.120:mRNA-p1-CDS1,TcCLB.506661.110:mRNA-p1-CDS1,TcCLB.506661.100:mRNA-p1-CDS1,TcCLB.506661.90:mRNA-p1-CDS1,TcCLB.506661.80:mRNA-p1-CDS1,TcCLB.506661.70:mRNA-p1-CDS1,TcCLB.506661.60:mRNA-p1-CD…
TcChr11-S	303307	305307	origins	CDS	ID=TcCLB.510989.50:mRNA-p1-CDS1;Parent=TcCLB.510989.50:mRNA;gene_id=TcCLB.510989.50;protein_source_id=TcCLB.510989.50:mRNA-p1
TcChr11-S	303307	305307	origins	exon	ID=exon_TcCLB.510989.50:mRNA-E1;Parent=TcCLB.510989.50:mRNA;gene_id=TcCLB.510989.50
TcChr11-S	303307	305307	origins	mRNA	ID=TcCLB.510989.50:mRNA;Parent=TcCLB.510989.50;description=hypothetical
TcChr11-S	303307	305307	origins	protein_coding_gene	ID=TcCLB.510989.50;description=hypothetical
TcChr11-S	303307	305307	origins	polycistron-CDS	ID=polycistron-CDS_11;contentCount=45;content=TcCLB.506661.170:mRNA-p1-CDS1,TcCLB.506661.160:mRNA-p1-CDS1,TcCLB.506661.150:mRNA-p1-CDS1,TcCLB.506661.140:mRNA-p1-CDS1,TcCLB.506661.130:mRNA-p1-CDS1,TcCLB.506661.120:mRNA-p1-CDS1,TcCLB.506661.110:mRNA-p1-CDS1,TcCLB.506661.100:mRNA-p1-CDS1,TcCLB.506661.90:mRNA-p1-CDS1,TcCLB.506661.80:mRNA-p1-CDS1,TcCLB.506661.70:mRNA-p1-CDS1,TcCLB.506661.60:mRNA-p1-CD…
TcChr11-S	308801	310801	origins	CDS	ID=TcCLB.510989.60:mRNA-p1-CDS1;Parent=TcCLB.510989.60:mRNA;gene_id=TcCLB.510989.60;protein_source_id=TcCLB.510989.60:mRNA-p1
TcChr11-S	308801	310801	origins	exon	ID=exon_TcCLB.510989.60:mRNA-E1;Parent=TcCLB.510989.60:mRNA;gene_id=TcCLB.510989.60
TcChr11-S	308801	310801	origins	mRNA	ID=TcCLB.510989.60:mRNA;Parent=TcCLB.510989.60;description=hypothetical
TcChr11-S	308801	310801	origins	protein_coding_gene	ID=TcCLB.510989.60;description=hypothetical
TcChr11-S	308801	310801	origins	polycistron-CDS	ID=polycistron-CDS_11;contentCount=45;content=TcCLB.506661.170:mRNA-p1-CDS1,TcCLB.506661.160:mRNA-p1-CDS1,TcCLB.506661.150:mRNA-p1-CDS1,TcCLB.506661.140:mRNA-p1-CDS1,TcCLB.506661.130:mRNA-p1-CDS1,TcCLB.506661.120:mRNA-p1-CDS1,TcCLB.506661.110:mRNA-p1-CDS1,TcCLB.506661.100:mRNA-p1-CDS1,TcCLB.506661.90:mRNA-p1-CDS1,TcCLB.506661.80:mRNA-p1-CDS1,TcCLB.506661.70:mRNA-p1-CDS1,TcCLB.506661.60:mRNA-p1-CD…
TcChr11-S	313433	315433	origins	CDS	ID=TcCLB.427247.4:mRNA-p1-CDS1;Parent=TcCLB.427247.4:mRNA;gene_id=TcCLB.427247.4;protein_source_id=TcCLB.427247.4:mRNA-p1
TcChr11-S	313433	315433	origins	exon	ID=exon_TcCLB.427247.4:mRNA-E1;Parent=TcCLB.427247.4:mRNA;gene_id=TcCLB.427247.4
TcChr11-S	313433	315433	origins	mRNA	ID=TcCLB.427247.4:mRNA;Parent=TcCLB.427247.4;description=Domain
TcChr11-S	313433	315433	origins	protein_coding_gene	ID=TcCLB.427247.4;description=Domain
TcChr11-S	313433	315433	origins	polycistron-CDS	ID=polycistron-CDS_11;contentCount=45;content=TcCLB.506661.170:mRNA-p1-CDS1,TcCLB.506661.160:mRNA-p1-CDS1,TcCLB.506661.150:mRNA-p1-CDS1,TcCLB.506661.140:mRNA-p1-CDS1,TcCLB.506661.130:mRNA-p1-CDS1,TcCLB.506661.120:mRNA-p1-CDS1,TcCLB.506661.110:mRNA-p1-CDS1,TcCLB.506661.100:mRNA-p1-CDS1,TcCLB.506661.90:mRNA-p1-CDS1,TcCLB.506661.80:mRNA-p1-CDS1,TcCLB.506661.70:mRNA-p1-CDS1,TcCLB.506661.60:mRNA-p1-CD…
TcChr11-S	337614	339614	origins	CDS	ID=TcCLB.506659.30:mRNA-p1-CDS1;Parent=TcCLB.506659.30:mRNA;gene_id=TcCLB.506659.30;protein_source_id=TcCLB.506659.30:mRNA-p1
TcChr11-S	337614	339614	origins	exon	ID=exon_TcCLB.506659.30:mRNA-E1;Parent=TcCLB.506659.30:mRNA;gene_id=TcCLB.506659.30
TcChr11-S	337614	339614	origins	mRNA	ID=TcCLB.506659.30:mRNA;Parent=TcCLB.506659.30;Note=6.3.2.3
TcChr11-S	337614	339614	origins	protein_coding_gene	ID=TcCLB.506659.30;description=glutathione
TcChr11-S	337614	339614	origins	polycistron-CDS	ID=polycistron-CDS_11;contentCount=45;content=TcCLB.506661.170:mRNA-p1-CDS1,TcCLB.506661.160:mRNA-p1-CDS1,TcCLB.506661.150:mRNA-p1-CDS1,TcCLB.506661.140:mRNA-p1-CDS1,TcCLB.506661.130:mRNA-p1-CDS1,TcCLB.506661.120:mRNA-p1-CDS1,TcCLB.506661.110:mRNA-p1-CDS1,TcCLB.506661.100:mRNA-p1-CDS1,TcCLB.506661.90:mRNA-p1-CDS1,TcCLB.506661.80:mRNA-p1-CDS1,TcCLB.506661.70:mRNA-p1-CDS1,TcCLB.506661.60:mRNA-p1-CD…
TcChr11-S	343087	345087	origins	CDS	ID=TcCLB.506659.20:mRNA-p1-CDS1;Parent=TcCLB.506659.20:mRNA;gene_id=TcCLB.506659.20;protein_source_id=TcCLB.506659.20:mRNA-p1
TcChr11-S	343087	345087	origins	exon	ID=exon_TcCLB.506659.20:mRNA-E1;Parent=TcCLB.506659.20:mRNA;gene_id=TcCLB.506659.20
TcChr11-S	343087	345087	origins	mRNA	ID=TcCLB.506659.20:mRNA;Parent=TcCLB.506659.20;description=mitochondrial
TcChr11-S	343087	345087	origins	protein_coding_gene	ID=TcCLB.506659.20;Name=POLIC;description=mitochondrial
TcChr11-S	343087	345087	origins	polycistron-CDS	ID=polycistron-CDS_11;contentCount=45;content=TcCLB.506661.170:mRNA-p1-CDS1,TcCLB.506661.160:mRNA-p1-CDS1,TcCLB.506661.150:mRNA-p1-CDS1,TcCLB.506661.140:mRNA-p1-CDS1,TcCLB.506661.130:mRNA-p1-CDS1,TcCLB.506661.120:mRNA-p1-CDS1,TcCLB.506661.110:mRNA-p1-CDS1,TcCLB.506661.100:mRNA-p1-CDS1,TcCLB.506661.90:mRNA-p1-CDS1,TcCLB.506661.80:mRNA-p1-CDS1,TcCLB.506661.70:mRNA-p1-CDS1,TcCLB.506661.60:mRNA-p1-CD…
TcChr11-S	348874	350874	origins	CDS	ID=TcCLB.506659.10:mRNA-p1-CDS1;Parent=TcCLB.506659.10:mRNA;gene_id=TcCLB.506659.10;protein_source_id=TcCLB.506659.10:mRNA-p1
TcChr11-S	348874	350874	origins	exon	ID=exon_TcCLB.506659.10:mRNA-E1;Parent=TcCLB.506659.10:mRNA;gene_id=TcCLB.506659.10
TcChr11-S	348874	350874	origins	mRNA	ID=TcCLB.506659.10:mRNA;Parent=TcCLB.506659.10;description=tc40
TcChr11-S	348874	350874	origins	protein_coding_gene	ID=TcCLB.506659.10;description=tc40
TcChr11-S	348874	350874	origins	polycistron-CDS	ID=polycistron-CDS_11;contentCount=45;content=TcCLB.506661.170:mRNA-p1-CDS1,TcCLB.506661.160:mRNA-p1-CDS1,TcCLB.506661.150:mRNA-p1-CDS1,TcCLB.506661.140:mRNA-p1-CDS1,TcCLB.506661.130:mRNA-p1-CDS1,TcCLB.506661.120:mRNA-p1-CDS1,TcCLB.506661.110:mRNA-p1-CDS1,TcCLB.506661.100:mRNA-p1-CDS1,TcCLB.506661.90:mRNA-p1-CDS1,TcCLB.506661.80:mRNA-p1-CDS1,TcCLB.506661.70:mRNA-p1-CDS1,TcCLB.506661.60:mRNA-p1-CD…
TcChr11-S	353233	355233	origins	polycistron-CDS	ID=polycistron-CDS_11;contentCount=45;content=TcCLB.506661.170:mRNA-p1-CDS1,TcCLB.506661.160:mRNA-p1-CDS1,TcCLB.506661.150:mRNA-p1-CDS1,TcCLB.506661.140:mRNA-p1-CDS1,TcCLB.506661.130:mRNA-p1-CDS1,TcCLB.506661.120:mRNA-p1-CDS1,TcCLB.506661.110:mRNA-p1-CDS1,TcCLB.506661.100:mRNA-p1-CDS1,TcCLB.506661.90:mRNA-p1-CDS1,TcCLB.506661.80:mRNA-p1-CDS1,TcCLB.506661.70:mRNA-p1-CDS1,TcCLB.506661.60:mRNA-p1-CD…
TcChr11-S	405939	407939	origins	CDS	ID=TcCLB.506795.80:mRNA-p1-CDS1;Parent=TcCLB.506795.80:mRNA;gene_id=TcCLB.506795.80;protein_source_id=TcCLB.506795.80:mRNA-p1
TcChr11-S	405939	407939	origins	exon	ID=exon_TcCLB.506795.80:mRNA-E1;Parent=TcCLB.506795.80:mRNA;gene_id=TcCLB.506795.80
TcChr11-S	405939	407939	origins	mRNA	ID=TcCLB.506795.80:mRNA;Parent=TcCLB.506795.80;description=proline
TcChr11-S	405939	407939	origins	protein_coding_gene	ID=TcCLB.506795.80;description=proline
TcChr11-S	405939	407939	origins	polycistron-CDS	ID=polycistron-CDS_12;contentCount=47;content=TcCLB.480975.10:mRNA-p1-CDS1,TcCLB.511253.10:mRNA-p1-CDS1,TcCLB.511253.20:mRNA-p1-CDS1,TcCLB.511253.31:mRNA-p1-CDS1,TcCLB.504227.5:mRNA-p1-CDS1,TcCLB.504227.10:mRNA-p1-CDS1,TcCLB.430737.10:mRNA-p1-CDS1,TcCLB.430737.20:mRNA-p1-CDS1,TcCLB.506795.100:mRNA-p1-CDS1,TcCLB.506795.90:mRNA-p1-CDS1,TcCLB.506795.80:mRNA-p1-CDS1,TcCLB.506795.70:mRNA-p1-CDS1,TcCLB…
TcChr11-S	435140	437140	origins	CDS	ID=TcCLB.510409.39:mRNA-p1-CDS1;Parent=TcCLB.510409.39:mRNA;gene_id=TcCLB.510409.39;protein_source_id=TcCLB.510409.39:mRNA-p1
TcChr11-S	435140	437140	origins	exon	ID=exon_TcCLB.510409.39:mRNA-E1;Parent=TcCLB.510409.39:mRNA;gene_id=TcCLB.510409.39
TcChr11-S	435140	437140	origins	mRNA	ID=TcCLB.510409.39:mRNA;Parent=TcCLB.510409.39;description=ubiquitin/ribosomal
TcChr11-S	435140	437140	origins	protein_coding_gene	ID=TcCLB.510409.39;description=ubiquitin/ribosomal
TcChr11-S	435140	437140	origins	CDS	ID=TcCLB.510409.30:mRNA-p1-CDS1;Parent=TcCLB.510409.30:mRNA;gene_id=TcCLB.510409.30;protein_source_id=TcCLB.510409.30:mRNA-p1
TcChr11-S	435140	437140	origins	exon	ID=exon_TcCLB.510409.30:mRNA-E1;Parent=TcCLB.510409.30:mRNA;gene_id=TcCLB.510409.30
TcChr11-S	435140	437140	origins	mRNA	ID=TcCLB.510409.30:mRNA;Parent=TcCLB.510409.30;description=TrkA-N
TcChr11-S	435140	437140	origins	protein_coding_gene	ID=TcCLB.510409.30;description=TrkA-N
TcChr11-S	435140	437140	origins	polycistron-CDS	ID=polycistron-CDS_12;contentCount=47;content=TcCLB.480975.10:mRNA-p1-CDS1,TcCLB.511253.10:mRNA-p1-CDS1,TcCLB.511253.20:mRNA-p1-CDS1,TcCLB.511253.31:mRNA-p1-CDS1,TcCLB.504227.5:mRNA-p1-CDS1,TcCLB.504227.10:mRNA-p1-CDS1,TcCLB.430737.10:mRNA-p1-CDS1,TcCLB.430737.20:mRNA-p1-CDS1,TcCLB.506795.100:mRNA-p1-CDS1,TcCLB.506795.90:mRNA-p1-CDS1,TcCLB.506795.80:mRNA-p1-CDS1,TcCLB.506795.70:mRNA-p1-CDS1,TcCLB…
TcChr11-S	442706	444706	origins	CDS	ID=TcCLB.510409.10:mRNA-p1-CDS1;Parent=TcCLB.510409.10:mRNA;gene_id=TcCLB.510409.10;protein_source_id=TcCLB.510409.10:mRNA-p1
TcChr11-S	442706	444706	origins	exon	ID=exon_TcCLB.510409.10:mRNA-E1;Parent=TcCLB.510409.10:mRNA;gene_id=TcCLB.510409.10
TcChr11-S	442706	444706	origins	mRNA	ID=TcCLB.510409.10:mRNA;Parent=TcCLB.510409.10;description=STE/STE11
TcChr11-S	442706	444706	origins	protein_coding_gene	ID=TcCLB.510409.10;description=STE/STE11
TcChr11-S	442706	444706	origins	polycistron-CDS	ID=polycistron-CDS_12;contentCount=47;content=TcCLB.480975.10:mRNA-p1-CDS1,TcCLB.511253.10:mRNA-p1-CDS1,TcCLB.511253.20:mRNA-p1-CDS1,TcCLB.511253.31:mRNA-p1-CDS1,TcCLB.504227.5:mRNA-p1-CDS1,TcCLB.504227.10:mRNA-p1-CDS1,TcCLB.430737.10:mRNA-p1-CDS1,TcCLB.430737.20:mRNA-p1-CDS1,TcCLB.506795.100:mRNA-p1-CDS1,TcCLB.506795.90:mRNA-p1-CDS1,TcCLB.506795.80:mRNA-p1-CDS1,TcCLB.506795.70:mRNA-p1-CDS1,TcCLB…
TcChr11-S	450459	452459	origins	CDS	ID=TcCLB.510407.80:mRNA-p1-CDS1;Parent=TcCLB.510407.80:mRNA;gene_id=TcCLB.510407.80;protein_source_id=TcCLB.510407.80:mRNA-p1
TcChr11-S	450459	452459	origins	exon	ID=exon_TcCLB.510407.80:mRNA-E1;Parent=TcCLB.510407.80:mRNA;gene_id=TcCLB.510407.80
TcChr11-S	450459	452459	origins	mRNA	ID=TcCLB.510407.80:mRNA;Parent=TcCLB.510407.80;description=chaperone
TcChr11-S	450459	452459	origins	protein_coding_gene	ID=TcCLB.510407.80;Name=J53;description=chaperone
TcChr11-S	450459	452459	origins	CDS	ID=TcCLB.510407.70:mRNA-p1-CDS1;Parent=TcCLB.510407.70:mRNA;gene_id=TcCLB.510407.70;protein_source_id=TcCLB.510407.70:mRNA-p1
TcChr11-S	450459	452459	origins	exon	ID=exon_TcCLB.510407.70:mRNA-E1;Parent=TcCLB.510407.70:mRNA;gene_id=TcCLB.510407.70
TcChr11-S	450459	452459	origins	mRNA	ID=TcCLB.510407.70:mRNA;Parent=TcCLB.510407.70;description=hypothetical
TcChr11-S	450459	452459	origins	protein_coding_gene	ID=TcCLB.510407.70;description=hypothetical
TcChr11-S	450459	452459	origins	polycistron-CDS	ID=polycistron-CDS_12;contentCount=47;content=TcCLB.480975.10:mRNA-p1-CDS1,TcCLB.511253.10:mRNA-p1-CDS1,TcCLB.511253.20:mRNA-p1-CDS1,TcCLB.511253.31:mRNA-p1-CDS1,TcCLB.504227.5:mRNA-p1-CDS1,TcCLB.504227.10:mRNA-p1-CDS1,TcCLB.430737.10:mRNA-p1-CDS1,TcCLB.430737.20:mRNA-p1-CDS1,TcCLB.506795.100:mRNA-p1-CDS1,TcCLB.506795.90:mRNA-p1-CDS1,TcCLB.506795.80:mRNA-p1-CDS1,TcCLB.506795.70:mRNA-p1-CDS1,TcCLB…
TcChr11-S	455237	457237	origins	exon	ID=exon_TcCLB.510407.60:pseudogenic_transcript-E1;Parent=TcCLB.510407.60:pseudogenic_transcript;gene_id=TcCLB.510407.60
TcChr11-S	455237	457237	origins	pseudogene	ID=TcCLB.510407.60;description=tyrosyl-tRNA
TcChr11-S	455237	457237	origins	pseudogenic_transcript	ID=TcCLB.510407.60:pseudogenic_transcript;Parent=TcCLB.510407.60;description=tyrosyl-tRNA
TcChr11-S	455237	457237	origins	CDS	ID=TcCLB.510407.40:mRNA-p1-CDS1;Parent=TcCLB.510407.40:mRNA;gene_id=TcCLB.510407.40;protein_source_id=TcCLB.510407.40:mRNA-p1
TcChr11-S	455237	457237	origins	exon	ID=exon_TcCLB.510407.40:mRNA-E1;Parent=TcCLB.510407.40:mRNA;gene_id=TcCLB.510407.40
TcChr11-S	455237	457237	origins	mRNA	ID=TcCLB.510407.40:mRNA;Parent=TcCLB.510407.40;description=hypothetical
TcChr11-S	455237	457237	origins	protein_coding_gene	ID=TcCLB.510407.40;description=hypothetical
TcChr11-S	455237	457237	origins	polycistron-CDS	ID=polycistron-CDS_12;contentCount=47;content=TcCLB.480975.10:mRNA-p1-CDS1,TcCLB.511253.10:mRNA-p1-CDS1,TcCLB.511253.20:mRNA-p1-CDS1,TcCLB.511253.31:mRNA-p1-CDS1,TcCLB.504227.5:mRNA-p1-CDS1,TcCLB.504227.10:mRNA-p1-CDS1,TcCLB.430737.10:mRNA-p1-CDS1,TcCLB.430737.20:mRNA-p1-CDS1,TcCLB.506795.100:mRNA-p1-CDS1,TcCLB.506795.90:mRNA-p1-CDS1,TcCLB.506795.80:mRNA-p1-CDS1,TcCLB.506795.70:mRNA-p1-CDS1,TcCLB…
TcChr11-S	472257	474257	origins	CDS	ID=TcCLB.508265.110:mRNA-p1-CDS1;Parent=TcCLB.508265.110:mRNA;gene_id=TcCLB.508265.110;protein_source_id=TcCLB.508265.110:mRNA-p1
TcChr11-S	472257	474257	origins	exon	ID=exon_TcCLB.508265.110:mRNA-E1;Parent=TcCLB.508265.110:mRNA;gene_id=TcCLB.508265.110
TcChr11-S	472257	474257	origins	mRNA	ID=TcCLB.508265.110:mRNA;Parent=TcCLB.508265.110;description=hypothetical
TcChr11-S	472257	474257	origins	protein_coding_gene	ID=TcCLB.508265.110;description=hypothetical
TcChr11-S	472257	474257	origins	CDS	ID=TcCLB.508265.100:mRNA-p1-CDS1;Parent=TcCLB.508265.100:mRNA;gene_id=TcCLB.508265.100;protein_source_id=TcCLB.508265.100:mRNA-p1
TcChr11-S	472257	474257	origins	exon	ID=exon_TcCLB.508265.100:mRNA-E1;Parent=TcCLB.508265.100:mRNA;gene_id=TcCLB.508265.100
TcChr11-S	472257	474257	origins	mRNA	ID=TcCLB.508265.100:mRNA;Parent=TcCLB.508265.100;description=cytoskeleton
TcChr11-S	472257	474257	origins	protein_coding_gene	ID=TcCLB.508265.100;description=cytoskeleton
TcChr11-S	472257	474257	origins	polycistron-CDS	ID=polycistron-CDS_12;contentCount=47;content=TcCLB.480975.10:mRNA-p1-CDS1,TcCLB.511253.10:mRNA-p1-CDS1,TcCLB.511253.20:mRNA-p1-CDS1,TcCLB.511253.31:mRNA-p1-CDS1,TcCLB.504227.5:mRNA-p1-CDS1,TcCLB.504227.10:mRNA-p1-CDS1,TcCLB.430737.10:mRNA-p1-CDS1,TcCLB.430737.20:mRNA-p1-CDS1,TcCLB.506795.100:mRNA-p1-CDS1,TcCLB.506795.90:mRNA-p1-CDS1,TcCLB.506795.80:mRNA-p1-CDS1,TcCLB.506795.70:mRNA-p1-CDS1,TcCLB…
TcChr11-S	477448	479448	origins	CDS	ID=TcCLB.508265.80:mRNA-p1-CDS1;Parent=TcCLB.508265.80:mRNA;gene_id=TcCLB.508265.80;protein_source_id=TcCLB.508265.80:mRNA-p1
TcChr11-S	477448	479448	origins	exon	ID=exon_TcCLB.508265.80:mRNA-E1;Parent=TcCLB.508265.80:mRNA;gene_id=TcCLB.508265.80
TcChr11-S	477448	479448	origins	mRNA	ID=TcCLB.508265.80:mRNA;Parent=TcCLB.508265.80;description=hypothetical
TcChr11-S	477448	479448	origins	protein_coding_gene	ID=TcCLB.508265.80;description=hypothetical
TcChr11-S	477448	479448	origins	polycistron-CDS	ID=polycistron-CDS_12;contentCount=47;content=TcCLB.480975.10:mRNA-p1-CDS1,TcCLB.511253.10:mRNA-p1-CDS1,TcCLB.511253.20:mRNA-p1-CDS1,TcCLB.511253.31:mRNA-p1-CDS1,TcCLB.504227.5:mRNA-p1-CDS1,TcCLB.504227.10:mRNA-p1-CDS1,TcCLB.430737.10:mRNA-p1-CDS1,TcCLB.430737.20:mRNA-p1-CDS1,TcCLB.506795.100:mRNA-p1-CDS1,TcCLB.506795.90:mRNA-p1-CDS1,TcCLB.506795.80:mRNA-p1-CDS1,TcCLB.506795.70:mRNA-p1-CDS1,TcCLB…
TcChr11-S	485189	487189	origins	CDS	ID=TcCLB.508265.40:mRNA-p1-CDS1;Parent=TcCLB.508265.40:mRNA;gene_id=TcCLB.508265.40;protein_source_id=TcCLB.508265.40:mRNA-p1
TcChr11-S	485189	487189	origins	exon	ID=exon_TcCLB.508265.40:mRNA-E1;Parent=TcCLB.508265.40:mRNA;gene_id=TcCLB.508265.40
TcChr11-S	485189	487189	origins	mRNA	ID=TcCLB.508265.40:mRNA;Parent=TcCLB.508265.40;description=hypothetical
TcChr11-S	485189	487189	origins	protein_coding_gene	ID=TcCLB.508265.40;description=hypothetical
TcChr11-S	485189	487189	origins	CDS	ID=TcCLB.508265.30:mRNA-p1-CDS1;Parent=TcCLB.508265.30:mRNA;gene_id=TcCLB.508265.30;protein_source_id=TcCLB.508265.30:mRNA-p1
TcChr11-S	485189	487189	origins	exon	ID=exon_TcCLB.508265.30:mRNA-E1;Parent=TcCLB.508265.30:mRNA;gene_id=TcCLB.508265.30
TcChr11-S	485189	487189	origins	mRNA	ID=TcCLB.508265.30:mRNA;Parent=TcCLB.508265.30;description=hypothetical
TcChr11-S	485189	487189	origins	protein_coding_gene	ID=TcCLB.508265.30;description=hypothetical
TcChr11-S	485189	487189	origins	polycistron-CDS	ID=polycistron-CDS_12;contentCount=47;content=TcCLB.480975.10:mRNA-p1-CDS1,TcCLB.511253.10:mRNA-p1-CDS1,TcCLB.511253.20:mRNA-p1-CDS1,TcCLB.511253.31:mRNA-p1-CDS1,TcCLB.504227.5:mRNA-p1-CDS1,TcCLB.504227.10:mRNA-p1-CDS1,TcCLB.430737.10:mRNA-p1-CDS1,TcCLB.430737.20:mRNA-p1-CDS1,TcCLB.506795.100:mRNA-p1-CDS1,TcCLB.506795.90:mRNA-p1-CDS1,TcCLB.506795.80:mRNA-p1-CDS1,TcCLB.506795.70:mRNA-p1-CDS1,TcCLB…
TcChr11-S	489143	491143	origins	CDS	ID=TcCLB.508265.10:mRNA-p1-CDS1;Parent=TcCLB.508265.10:mRNA;gene_id=TcCLB.508265.10;protein_source_id=TcCLB.508265.10:mRNA-p1
TcChr11-S	489143	491143	origins	exon	ID=exon_TcCLB.508265.10:mRNA-E1;Parent=TcCLB.508265.10:mRNA;gene_id=TcCLB.508265.10
TcChr11-S	489143	491143	origins	mRNA	ID=TcCLB.508265.10:mRNA;Parent=TcCLB.508265.10;Note=5.3.99.3
TcChr11-S	489143	491143	origins	protein_coding_gene	ID=TcCLB.508265.10;description=glutathione-S-transferase/glutaredoxin%2C
TcChr11-S	489143	491143	origins	CDS	ID=TcCLB.508265.4:mRNA-p1-CDS1;Parent=TcCLB.508265.4:mRNA;gene_id=TcCLB.508265.4;protein_source_id=TcCLB.508265.4:mRNA-p1
TcChr11-S	489143	491143	origins	exon	ID=exon_TcCLB.508265.4:mRNA-E1;Parent=TcCLB.508265.4:mRNA;gene_id=TcCLB.508265.4
TcChr11-S	489143	491143	origins	mRNA	ID=TcCLB.508265.4:mRNA;Parent=TcCLB.508265.4;description=synaptojanin
TcChr11-S	489143	491143	origins	protein_coding_gene	ID=TcCLB.508265.4;description=synaptojanin
TcChr11-S	489143	491143	origins	polycistron-CDS	ID=polycistron-CDS_12;contentCount=47;content=TcCLB.480975.10:mRNA-p1-CDS1,TcCLB.511253.10:mRNA-p1-CDS1,TcCLB.511253.20:mRNA-p1-CDS1,TcCLB.511253.31:mRNA-p1-CDS1,TcCLB.504227.5:mRNA-p1-CDS1,TcCLB.504227.10:mRNA-p1-CDS1,TcCLB.430737.10:mRNA-p1-CDS1,TcCLB.430737.20:mRNA-p1-CDS1,TcCLB.506795.100:mRNA-p1-CDS1,TcCLB.506795.90:mRNA-p1-CDS1,TcCLB.506795.80:mRNA-p1-CDS1,TcCLB.506795.70:mRNA-p1-CDS1,TcCLB…
TcChr11-S	498535	500535	origins	polycistron-CDS	ID=polycistron-CDS_12;contentCount=47;content=TcCLB.480975.10:mRNA-p1-CDS1,TcCLB.511253.10:mRNA-p1-CDS1,TcCLB.511253.20:mRNA-p1-CDS1,TcCLB.511253.31:mRNA-p1-CDS1,TcCLB.504227.5:mRNA-p1-CDS1,TcCLB.504227.10:mRNA-p1-CDS1,TcCLB.430737.10:mRNA-p1-CDS1,TcCLB.430737.20:mRNA-p1-CDS1,TcCLB.506795.100:mRNA-p1-CDS1,TcCLB.506795.90:mRNA-p1-CDS1,TcCLB.506795.80:mRNA-p1-CDS1,TcCLB.506795.70:mRNA-p1-CDS1,TcCLB…
TcChr12-S	7095	9095	origins	polycistron-CDS	ID=polycistron-CDS_13;contentCount=10;content=TcCLB.506683.30:mRNA-p1-CDS1,TcCLB.506683.110:mRNA-p1-CDS1,TcCLB.506683.180:mRNA-p1-CDS1,TcCLB.506683.190:mRNA-p1-CDS1,TcCLB.506683.240:mRNA-p1-CDS1,TcCLB.509087.20:mRNA-p1-CDS1,TcCLB.473633.9:mRNA-p1-CDS1,TcCLB.511567.11:mRNA-p1-CDS1,TcCLB.509089.9:mRNA-p1-CDS1,TcCLB.511569.14:mRNA-p1-CDS1
TcChr12-S	17293	19293	origins	polycistron-CDS	ID=polycistron-CDS_13;contentCount=10;content=TcCLB.506683.30:mRNA-p1-CDS1,TcCLB.506683.110:mRNA-p1-CDS1,TcCLB.506683.180:mRNA-p1-CDS1,TcCLB.506683.190:mRNA-p1-CDS1,TcCLB.506683.240:mRNA-p1-CDS1,TcCLB.509087.20:mRNA-p1-CDS1,TcCLB.473633.9:mRNA-p1-CDS1,TcCLB.511567.11:mRNA-p1-CDS1,TcCLB.509089.9:mRNA-p1-CDS1,TcCLB.511569.14:mRNA-p1-CDS1
TcChr12-S	26749	28749	origins	CDS	ID=TcCLB.506683.110:mRNA-p1-CDS1;Parent=TcCLB.506683.110:mRNA;gene_id=TcCLB.506683.110;protein_source_id=TcCLB.506683.110:mRNA-p1
TcChr12-S	26749	28749	origins	exon	ID=exon_TcCLB.506683.110:mRNA-E1;Parent=TcCLB.506683.110:mRNA;gene_id=TcCLB.506683.110
TcChr12-S	26749	28749	origins	mRNA	ID=TcCLB.506683.110:mRNA;Parent=TcCLB.506683.110;description=trans-sialidase%2C
TcChr12-S	26749	28749	origins	protein_coding_gene	ID=TcCLB.506683.110;description=trans-sialidase%2C
TcChr12-S	26749	28749	origins	polycistron-CDS	ID=polycistron-CDS_13;contentCount=10;content=TcCLB.506683.30:mRNA-p1-CDS1,TcCLB.506683.110:mRNA-p1-CDS1,TcCLB.506683.180:mRNA-p1-CDS1,TcCLB.506683.190:mRNA-p1-CDS1,TcCLB.506683.240:mRNA-p1-CDS1,TcCLB.509087.20:mRNA-p1-CDS1,TcCLB.473633.9:mRNA-p1-CDS1,TcCLB.511567.11:mRNA-p1-CDS1,TcCLB.509089.9:mRNA-p1-CDS1,TcCLB.511569.14:mRNA-p1-CDS1
TcChr12-S	32064	34064	origins	exon	ID=exon_TcCLB.506683.140:pseudogenic_transcript-E1;Parent=TcCLB.506683.140:pseudogenic_transcript;gene_id=TcCLB.506683.140
TcChr12-S	32064	34064	origins	pseudogene	ID=TcCLB.506683.140;description=beta
TcChr12-S	32064	34064	origins	pseudogenic_transcript	ID=TcCLB.506683.140:pseudogenic_transcript;Parent=TcCLB.506683.140;description=beta
TcChr12-S	32064	34064	origins	polycistron-CDS	ID=polycistron-CDS_13;contentCount=10;content=TcCLB.506683.30:mRNA-p1-CDS1,TcCLB.506683.110:mRNA-p1-CDS1,TcCLB.506683.180:mRNA-p1-CDS1,TcCLB.506683.190:mRNA-p1-CDS1,TcCLB.506683.240:mRNA-p1-CDS1,TcCLB.509087.20:mRNA-p1-CDS1,TcCLB.473633.9:mRNA-p1-CDS1,TcCLB.511567.11:mRNA-p1-CDS1,TcCLB.509089.9:mRNA-p1-CDS1,TcCLB.511569.14:mRNA-p1-CDS1
TcChr12-S	36751	38751	origins	polycistron-CDS	ID=polycistron-CDS_13;contentCount=10;content=TcCLB.506683.30:mRNA-p1-CDS1,TcCLB.506683.110:mRNA-p1-CDS1,TcCLB.506683.180:mRNA-p1-CDS1,TcCLB.506683.190:mRNA-p1-CDS1,TcCLB.506683.240:mRNA-p1-CDS1,TcCLB.509087.20:mRNA-p1-CDS1,TcCLB.473633.9:mRNA-p1-CDS1,TcCLB.511567.11:mRNA-p1-CDS1,TcCLB.509089.9:mRNA-p1-CDS1,TcCLB.511569.14:mRNA-p1-CDS1
TcChr12-S	48186	50186	origins	polycistron-CDS	ID=polycistron-CDS_13;contentCount=10;content=TcCLB.506683.30:mRNA-p1-CDS1,TcCLB.506683.110:mRNA-p1-CDS1,TcCLB.506683.180:mRNA-p1-CDS1,TcCLB.506683.190:mRNA-p1-CDS1,TcCLB.506683.240:mRNA-p1-CDS1,TcCLB.509087.20:mRNA-p1-CDS1,TcCLB.473633.9:mRNA-p1-CDS1,TcCLB.511567.11:mRNA-p1-CDS1,TcCLB.509089.9:mRNA-p1-CDS1,TcCLB.511569.14:mRNA-p1-CDS1
TcChr12-S	48186	50186	origins	CDS	ID=TcCLB.506683.180:mRNA-p1-CDS1;Parent=TcCLB.506683.180:mRNA;gene_id=TcCLB.506683.180;protein_source_id=TcCLB.506683.180:mRNA-p1
TcChr12-S	48186	50186	origins	exon	ID=exon_TcCLB.506683.180:mRNA-E1;Parent=TcCLB.506683.180:mRNA;gene_id=TcCLB.506683.180
TcChr12-S	48186	50186	origins	mRNA	ID=TcCLB.506683.180:mRNA;Parent=TcCLB.506683.180;description=dispersed
TcChr12-S	48186	50186	origins	protein_coding_gene	ID=TcCLB.506683.180;description=dispersed
TcChr12-S	51926	53926	origins	CDS	ID=TcCLB.506683.190:mRNA-p1-CDS1;Parent=TcCLB.506683.190:mRNA;gene_id=TcCLB.506683.190;protein_source_id=TcCLB.506683.190:mRNA-p1
TcChr12-S	51926	53926	origins	exon	ID=exon_TcCLB.506683.190:mRNA-E1;Parent=TcCLB.506683.190:mRNA;gene_id=TcCLB.506683.190
TcChr12-S	51926	53926	origins	mRNA	ID=TcCLB.506683.190:mRNA;Parent=TcCLB.506683.190;description=trans-sialidase%2C
TcChr12-S	51926	53926	origins	protein_coding_gene	ID=TcCLB.506683.190;description=trans-sialidase%2C
TcChr12-S	51926	53926	origins	polycistron-CDS	ID=polycistron-CDS_13;contentCount=10;content=TcCLB.506683.30:mRNA-p1-CDS1,TcCLB.506683.110:mRNA-p1-CDS1,TcCLB.506683.180:mRNA-p1-CDS1,TcCLB.506683.190:mRNA-p1-CDS1,TcCLB.506683.240:mRNA-p1-CDS1,TcCLB.509087.20:mRNA-p1-CDS1,TcCLB.473633.9:mRNA-p1-CDS1,TcCLB.511567.11:mRNA-p1-CDS1,TcCLB.509089.9:mRNA-p1-CDS1,TcCLB.511569.14:mRNA-p1-CDS1
TcChr12-S	51926	53926	origins	CDS	ID=TcCLB.506683.180:mRNA-p1-CDS1;Parent=TcCLB.506683.180:mRNA;gene_id=TcCLB.506683.180;protein_source_id=TcCLB.506683.180:mRNA-p1
TcChr12-S	51926	53926	origins	exon	ID=exon_TcCLB.506683.180:mRNA-E1;Parent=TcCLB.506683.180:mRNA;gene_id=TcCLB.506683.180
TcChr12-S	51926	53926	origins	mRNA	ID=TcCLB.506683.180:mRNA;Parent=TcCLB.506683.180;description=dispersed
TcChr12-S	51926	53926	origins	protein_coding_gene	ID=TcCLB.506683.180;description=dispersed
TcChr12-S	96225	98225	origins	TSS	ID=TSS_6;adjacentPol=polycistron-CDS_13,polycistron-CDS_14
TcChr12-S	96225	98225	origins	exon	ID=exon_TcCLB.511569.30:pseudogenic_transcript-E1;Parent=TcCLB.511569.30:pseudogenic_transcript;gene_id=TcCLB.511569.30
TcChr12-S	96225	98225	origins	pseudogene	ID=TcCLB.511569.30;description=trans-sialidase
TcChr12-S	96225	98225	origins	pseudogenic_transcript	ID=TcCLB.511569.30:pseudogenic_transcript;Parent=TcCLB.511569.30;description=trans-sialidase
TcChr12-S	96225	98225	origins	dSSR	ID=dSSR_6;adjacentPol=polycistron-CDS_13,polycistron-CDS_14
TcChr12-S	96225	98225	origins	exon	ID=exon_TcCLB.506685.5:pseudogenic_transcript-E1;Parent=TcCLB.506685.5:pseudogenic_transcript;gene_id=TcCLB.506685.5
TcChr12-S	96225	98225	origins	pseudogene	ID=TcCLB.506685.5;description=trans-sialidase
TcChr12-S	96225	98225	origins	pseudogenic_transcript	ID=TcCLB.506685.5:pseudogenic_transcript;Parent=TcCLB.506685.5;description=trans-sialidase
TcChr12-S	102740	104740	origins	CDS	ID=TcCLB.506685.10:mRNA-p1-CDS1;Parent=TcCLB.506685.10:mRNA;gene_id=TcCLB.506685.10;protein_source_id=TcCLB.506685.10:mRNA-p1
TcChr12-S	102740	104740	origins	exon	ID=exon_TcCLB.506685.10:mRNA-E1;Parent=TcCLB.506685.10:mRNA;gene_id=TcCLB.506685.10
TcChr12-S	102740	104740	origins	mRNA	ID=TcCLB.506685.10:mRNA;Parent=TcCLB.506685.10;description=hypothetical
TcChr12-S	102740	104740	origins	protein_coding_gene	ID=TcCLB.506685.10;description=hypothetical
TcChr12-S	102740	104740	origins	CDS	ID=TcCLB.506685.20:mRNA-p1-CDS1;Parent=TcCLB.506685.20:mRNA;gene_id=TcCLB.506685.20;protein_source_id=TcCLB.506685.20:mRNA-p1
TcChr12-S	102740	104740	origins	exon	ID=exon_TcCLB.506685.20:mRNA-E1;Parent=TcCLB.506685.20:mRNA;gene_id=TcCLB.506685.20
TcChr12-S	102740	104740	origins	mRNA	ID=TcCLB.506685.20:mRNA;Parent=TcCLB.506685.20;description=Dos2-interacting
TcChr12-S	102740	104740	origins	protein_coding_gene	ID=TcCLB.506685.20;description=Dos2-interacting
TcChr12-S	102740	104740	origins	polycistron-CDS	ID=polycistron-CDS_14;contentCount=43;content=TcCLB.506685.10:mRNA-p1-CDS1,TcCLB.506685.20:mRNA-p1-CDS1,TcCLB.506685.30:mRNA-p1-CDS1,TcCLB.506685.40:mRNA-p1-CDS1,TcCLB.506685.50:mRNA-p1-CDS1,TcCLB.503905.10:mRNA-p1-CDS1,TcCLB.503905.30:mRNA-p1-CDS1,TcCLB.503905.40:mRNA-p1-CDS1,TcCLB.503905.50:mRNA-p1-CDS1,TcCLB.503595.10:mRNA-p1-CDS1,TcCLB.503595.19:mRNA-p1-CDS1,TcCLB.511571.10:mRNA-p1-CDS1,TcCLB…
TcChr12-S	126834	128834	origins	CDS	ID=TcCLB.503595.19:mRNA-p1-CDS1;Parent=TcCLB.503595.19:mRNA;gene_id=TcCLB.503595.19;protein_source_id=TcCLB.503595.19:mRNA-p1
TcChr12-S	126834	128834	origins	exon	ID=exon_TcCLB.503595.19:mRNA-E1;Parent=TcCLB.503595.19:mRNA;gene_id=TcCLB.503595.19
TcChr12-S	126834	128834	origins	mRNA	ID=TcCLB.503595.19:mRNA;Parent=TcCLB.503595.19;description=ATP-dependent
TcChr12-S	126834	128834	origins	protein_coding_gene	ID=TcCLB.503595.19;description=ATP-dependent
TcChr12-S	126834	128834	origins	CDS	ID=TcCLB.511571.10:mRNA-p1-CDS1;Parent=TcCLB.511571.10:mRNA;gene_id=TcCLB.511571.10;protein_source_id=TcCLB.511571.10:mRNA-p1
TcChr12-S	126834	128834	origins	exon	ID=exon_TcCLB.511571.10:mRNA-E1;Parent=TcCLB.511571.10:mRNA;gene_id=TcCLB.511571.10
TcChr12-S	126834	128834	origins	mRNA	ID=TcCLB.511571.10:mRNA;Parent=TcCLB.511571.10;description=ATP-dependent
TcChr12-S	126834	128834	origins	protein_coding_gene	ID=TcCLB.511571.10;description=ATP-dependent
TcChr12-S	126834	128834	origins	polycistron-CDS	ID=polycistron-CDS_14;contentCount=43;content=TcCLB.506685.10:mRNA-p1-CDS1,TcCLB.506685.20:mRNA-p1-CDS1,TcCLB.506685.30:mRNA-p1-CDS1,TcCLB.506685.40:mRNA-p1-CDS1,TcCLB.506685.50:mRNA-p1-CDS1,TcCLB.503905.10:mRNA-p1-CDS1,TcCLB.503905.30:mRNA-p1-CDS1,TcCLB.503905.40:mRNA-p1-CDS1,TcCLB.503905.50:mRNA-p1-CDS1,TcCLB.503595.10:mRNA-p1-CDS1,TcCLB.503595.19:mRNA-p1-CDS1,TcCLB.511571.10:mRNA-p1-CDS1,TcCLB…
TcChr12-S	162009	164009	origins	CDS	ID=TcCLB.511575.60:mRNA-p1-CDS1;Parent=TcCLB.511575.60:mRNA;gene_id=TcCLB.511575.60;protein_source_id=TcCLB.511575.60:mRNA-p1
TcChr12-S	162009	164009	origins	exon	ID=exon_TcCLB.511575.60:mRNA-E1;Parent=TcCLB.511575.60:mRNA;gene_id=TcCLB.511575.60
TcChr12-S	162009	164009	origins	mRNA	ID=TcCLB.511575.60:mRNA;Parent=TcCLB.511575.60;Note=1.1.1.42
TcChr12-S	162009	164009	origins	protein_coding_gene	ID=TcCLB.511575.60;description=isocitrate
TcChr12-S	162009	164009	origins	polycistron-CDS	ID=polycistron-CDS_14;contentCount=43;content=TcCLB.506685.10:mRNA-p1-CDS1,TcCLB.506685.20:mRNA-p1-CDS1,TcCLB.506685.30:mRNA-p1-CDS1,TcCLB.506685.40:mRNA-p1-CDS1,TcCLB.506685.50:mRNA-p1-CDS1,TcCLB.503905.10:mRNA-p1-CDS1,TcCLB.503905.30:mRNA-p1-CDS1,TcCLB.503905.40:mRNA-p1-CDS1,TcCLB.503905.50:mRNA-p1-CDS1,TcCLB.503595.10:mRNA-p1-CDS1,TcCLB.503595.19:mRNA-p1-CDS1,TcCLB.511571.10:mRNA-p1-CDS1,TcCLB…
TcChr12-S	185617	187617	origins	CDS	ID=TcCLB.505945.69:mRNA-p1-CDS1;Parent=TcCLB.505945.69:mRNA;gene_id=TcCLB.505945.69;protein_source_id=TcCLB.505945.69:mRNA-p1
TcChr12-S	185617	187617	origins	exon	ID=exon_TcCLB.505945.69:mRNA-E1;Parent=TcCLB.505945.69:mRNA;gene_id=TcCLB.505945.69
TcChr12-S	185617	187617	origins	mRNA	ID=TcCLB.505945.69:mRNA;Parent=TcCLB.505945.69;description=hypothetical
TcChr12-S	185617	187617	origins	protein_coding_gene	ID=TcCLB.505945.69;description=hypothetical
TcChr12-S	185617	187617	origins	CDS	ID=TcCLB.505945.60:mRNA-p1-CDS1;Parent=TcCLB.505945.60:mRNA;gene_id=TcCLB.505945.60;protein_source_id=TcCLB.505945.60:mRNA-p1
TcChr12-S	185617	187617	origins	exon	ID=exon_TcCLB.505945.60:mRNA-E1;Parent=TcCLB.505945.60:mRNA;gene_id=TcCLB.505945.60
TcChr12-S	185617	187617	origins	mRNA	ID=TcCLB.505945.60:mRNA;Parent=TcCLB.505945.60;description=hypothetical
TcChr12-S	185617	187617	origins	protein_coding_gene	ID=TcCLB.505945.60;description=hypothetical
TcChr12-S	185617	187617	origins	polycistron-CDS	ID=polycistron-CDS_14;contentCount=43;content=TcCLB.506685.10:mRNA-p1-CDS1,TcCLB.506685.20:mRNA-p1-CDS1,TcCLB.506685.30:mRNA-p1-CDS1,TcCLB.506685.40:mRNA-p1-CDS1,TcCLB.506685.50:mRNA-p1-CDS1,TcCLB.503905.10:mRNA-p1-CDS1,TcCLB.503905.30:mRNA-p1-CDS1,TcCLB.503905.40:mRNA-p1-CDS1,TcCLB.503905.50:mRNA-p1-CDS1,TcCLB.503595.10:mRNA-p1-CDS1,TcCLB.503595.19:mRNA-p1-CDS1,TcCLB.511571.10:mRNA-p1-CDS1,TcCLB…
TcChr12-S	193303	195303	origins	CDS	ID=TcCLB.505945.20:mRNA-p1-CDS1;Parent=TcCLB.505945.20:mRNA;gene_id=TcCLB.505945.20;protein_source_id=TcCLB.505945.20:mRNA-p1
TcChr12-S	193303	195303	origins	exon	ID=exon_TcCLB.505945.20:mRNA-E1;Parent=TcCLB.505945.20:mRNA;gene_id=TcCLB.505945.20
TcChr12-S	193303	195303	origins	mRNA	ID=TcCLB.505945.20:mRNA;Parent=TcCLB.505945.20;description=ribonuclease
TcChr12-S	193303	195303	origins	protein_coding_gene	ID=TcCLB.505945.20;description=ribonuclease
TcChr12-S	193303	195303	origins	CDS	ID=TcCLB.505945.10:mRNA-p1-CDS1;Parent=TcCLB.505945.10:mRNA;gene_id=TcCLB.505945.10;protein_source_id=TcCLB.505945.10:mRNA-p1
TcChr12-S	193303	195303	origins	exon	ID=exon_TcCLB.505945.10:mRNA-E1;Parent=TcCLB.505945.10:mRNA;gene_id=TcCLB.505945.10
TcChr12-S	193303	195303	origins	mRNA	ID=TcCLB.505945.10:mRNA;Parent=TcCLB.505945.10;description=DNA
TcChr12-S	193303	195303	origins	protein_coding_gene	ID=TcCLB.505945.10;description=DNA
TcChr12-S	193303	195303	origins	polycistron-CDS	ID=polycistron-CDS_14;contentCount=43;content=TcCLB.506685.10:mRNA-p1-CDS1,TcCLB.506685.20:mRNA-p1-CDS1,TcCLB.506685.30:mRNA-p1-CDS1,TcCLB.506685.40:mRNA-p1-CDS1,TcCLB.506685.50:mRNA-p1-CDS1,TcCLB.503905.10:mRNA-p1-CDS1,TcCLB.503905.30:mRNA-p1-CDS1,TcCLB.503905.40:mRNA-p1-CDS1,TcCLB.503905.50:mRNA-p1-CDS1,TcCLB.503595.10:mRNA-p1-CDS1,TcCLB.503595.19:mRNA-p1-CDS1,TcCLB.511571.10:mRNA-p1-CDS1,TcCLB…
TcChr12-S	205966	207966	origins	exon	ID=exon_TcCLB.509473.10:pseudogenic_transcript-E1;Parent=TcCLB.509473.10:pseudogenic_transcript;gene_id=TcCLB.509473.10
TcChr12-S	205966	207966	origins	pseudogene	ID=TcCLB.509473.10;description=hypothetical
TcChr12-S	205966	207966	origins	pseudogenic_transcript	ID=TcCLB.509473.10:pseudogenic_transcript;Parent=TcCLB.509473.10;description=hypothetical
TcChr12-S	205966	207966	origins	polycistron-CDS	ID=polycistron-CDS_14;contentCount=43;content=TcCLB.506685.10:mRNA-p1-CDS1,TcCLB.506685.20:mRNA-p1-CDS1,TcCLB.506685.30:mRNA-p1-CDS1,TcCLB.506685.40:mRNA-p1-CDS1,TcCLB.506685.50:mRNA-p1-CDS1,TcCLB.503905.10:mRNA-p1-CDS1,TcCLB.503905.30:mRNA-p1-CDS1,TcCLB.503905.40:mRNA-p1-CDS1,TcCLB.503905.50:mRNA-p1-CDS1,TcCLB.503595.10:mRNA-p1-CDS1,TcCLB.503595.19:mRNA-p1-CDS1,TcCLB.511571.10:mRNA-p1-CDS1,TcCLB…
TcChr12-S	216237	218237	origins	exon	ID=exon_TcCLB.509473.10:pseudogenic_transcript-E1;Parent=TcCLB.509473.10:pseudogenic_transcript;gene_id=TcCLB.509473.10
TcChr12-S	216237	218237	origins	pseudogene	ID=TcCLB.509473.10;description=hypothetical
TcChr12-S	216237	218237	origins	pseudogenic_transcript	ID=TcCLB.509473.10:pseudogenic_transcript;Parent=TcCLB.509473.10;description=hypothetical
TcChr12-S	216237	218237	origins	polycistron-CDS	ID=polycistron-CDS_14;contentCount=43;content=TcCLB.506685.10:mRNA-p1-CDS1,TcCLB.506685.20:mRNA-p1-CDS1,TcCLB.506685.30:mRNA-p1-CDS1,TcCLB.506685.40:mRNA-p1-CDS1,TcCLB.506685.50:mRNA-p1-CDS1,TcCLB.503905.10:mRNA-p1-CDS1,TcCLB.503905.30:mRNA-p1-CDS1,TcCLB.503905.40:mRNA-p1-CDS1,TcCLB.503905.50:mRNA-p1-CDS1,TcCLB.503595.10:mRNA-p1-CDS1,TcCLB.503595.19:mRNA-p1-CDS1,TcCLB.511571.10:mRNA-p1-CDS1,TcCLB…
TcChr12-S	235194	237194	origins	exon	ID=exon_TcCLB.505943.110:pseudogenic_transcript-E1;Parent=TcCLB.505943.110:pseudogenic_transcript;gene_id=TcCLB.505943.110
TcChr12-S	235194	237194	origins	pseudogene	ID=TcCLB.505943.110;description=retrotransposon
TcChr12-S	235194	237194	origins	pseudogenic_transcript	ID=TcCLB.505943.110:pseudogenic_transcript;Parent=TcCLB.505943.110;description=retrotransposon
TcChr12-S	235194	237194	origins	Intergenic_Polycistron_Region	ID=Intergenic_Polycistron_Region_5;adjacentPol=polycistron-rRNA_1,polycistron-CDS_15
TcChr12-S	241338	243338	origins	Intergenic_Polycistron_Region	ID=Intergenic_Polycistron_Region_5;adjacentPol=polycistron-rRNA_1,polycistron-CDS_15
TcChr12-S	249816	251816	origins	Intergenic_Polycistron_Region	ID=Intergenic_Polycistron_Region_5;adjacentPol=polycistron-rRNA_1,polycistron-CDS_15
TcChr12-S	268550	270550	origins	exon	ID=exon_TcCLB.505941.20:pseudogenic_transcript-E1;Parent=TcCLB.505941.20:pseudogenic_transcript;gene_id=TcCLB.505941.20
TcChr12-S	268550	270550	origins	pseudogene	ID=TcCLB.505941.20;description=surface
TcChr12-S	268550	270550	origins	pseudogenic_transcript	ID=TcCLB.505941.20:pseudogenic_transcript;Parent=TcCLB.505941.20;description=surface
TcChr12-S	268550	270550	origins	polycistron-CDS	ID=polycistron-CDS_15;contentCount=84;content=TcCLB.505943.50:mRNA-p1-CDS1,TcCLB.505943.40:mRNA-p1-CDS1,TcCLB.505943.30:mRNA-p1-CDS1,TcCLB.505943.20:mRNA-p1-CDS1,TcCLB.505943.10:mRNA-p1-CDS1,TcCLB.505941.49:mRNA-p1-CDS1,TcCLB.505941.40:mRNA-p1-CDS1,TcCLB.505941.30:mRNA-p1-CDS1,TcCLB.505941.10:mRNA-p1-CDS1,TcCLB.506867.40:mRNA-p1-CDS1,TcCLB.506867.30:mRNA-p1-CDS1,TcCLB.506867.20:mRNA-p1-CDS1,TcCLB…
TcChr12-S	278406	280406	origins	CDS	ID=TcCLB.506867.10:mRNA-p1-CDS1;Parent=TcCLB.506867.10:mRNA;gene_id=TcCLB.506867.10;protein_source_id=TcCLB.506867.10:mRNA-p1
TcChr12-S	278406	280406	origins	exon	ID=exon_TcCLB.506867.10:mRNA-E1;Parent=TcCLB.506867.10:mRNA;gene_id=TcCLB.506867.10
TcChr12-S	278406	280406	origins	mRNA	ID=TcCLB.506867.10:mRNA;Parent=TcCLB.506867.10;Note=3.1.30.-
TcChr12-S	278406	280406	origins	protein_coding_gene	ID=TcCLB.506867.10;description=endonuclease
TcChr12-S	278406	280406	origins	polycistron-CDS	ID=polycistron-CDS_15;contentCount=84;content=TcCLB.505943.50:mRNA-p1-CDS1,TcCLB.505943.40:mRNA-p1-CDS1,TcCLB.505943.30:mRNA-p1-CDS1,TcCLB.505943.20:mRNA-p1-CDS1,TcCLB.505943.10:mRNA-p1-CDS1,TcCLB.505941.49:mRNA-p1-CDS1,TcCLB.505941.40:mRNA-p1-CDS1,TcCLB.505941.30:mRNA-p1-CDS1,TcCLB.505941.10:mRNA-p1-CDS1,TcCLB.506867.40:mRNA-p1-CDS1,TcCLB.506867.30:mRNA-p1-CDS1,TcCLB.506867.20:mRNA-p1-CDS1,TcCLB…
TcChr12-S	284874	286874	origins	CDS	ID=TcCLB.503571.10:mRNA-p1-CDS1;Parent=TcCLB.503571.10:mRNA;gene_id=TcCLB.503571.10;protein_source_id=TcCLB.503571.10:mRNA-p1
TcChr12-S	284874	286874	origins	exon	ID=exon_TcCLB.503571.10:mRNA-E1;Parent=TcCLB.503571.10:mRNA;gene_id=TcCLB.503571.10
TcChr12-S	284874	286874	origins	mRNA	ID=TcCLB.503571.10:mRNA;Parent=TcCLB.503571.10;description=Flagellum
TcChr12-S	284874	286874	origins	protein_coding_gene	ID=TcCLB.503571.10;Name=FLA1;description=Flagellum
TcChr12-S	284874	286874	origins	polycistron-CDS	ID=polycistron-CDS_15;contentCount=84;content=TcCLB.505943.50:mRNA-p1-CDS1,TcCLB.505943.40:mRNA-p1-CDS1,TcCLB.505943.30:mRNA-p1-CDS1,TcCLB.505943.20:mRNA-p1-CDS1,TcCLB.505943.10:mRNA-p1-CDS1,TcCLB.505941.49:mRNA-p1-CDS1,TcCLB.505941.40:mRNA-p1-CDS1,TcCLB.505941.30:mRNA-p1-CDS1,TcCLB.505941.10:mRNA-p1-CDS1,TcCLB.506867.40:mRNA-p1-CDS1,TcCLB.506867.30:mRNA-p1-CDS1,TcCLB.506867.20:mRNA-p1-CDS1,TcCLB…
TcChr12-S	297103	299103	origins	CDS	ID=TcCLB.503897.110:mRNA-p1-CDS1;Parent=TcCLB.503897.110:mRNA;gene_id=TcCLB.503897.110;protein_source_id=TcCLB.503897.110:mRNA-p1
TcChr12-S	297103	299103	origins	exon	ID=exon_TcCLB.503897.110:mRNA-E1;Parent=TcCLB.503897.110:mRNA;gene_id=TcCLB.503897.110
TcChr12-S	297103	299103	origins	mRNA	ID=TcCLB.503897.110:mRNA;Parent=TcCLB.503897.110;description=plectin-like
TcChr12-S	297103	299103	origins	protein_coding_gene	ID=TcCLB.503897.110;description=plectin-like
TcChr12-S	297103	299103	origins	polycistron-CDS	ID=polycistron-CDS_15;contentCount=84;content=TcCLB.505943.50:mRNA-p1-CDS1,TcCLB.505943.40:mRNA-p1-CDS1,TcCLB.505943.30:mRNA-p1-CDS1,TcCLB.505943.20:mRNA-p1-CDS1,TcCLB.505943.10:mRNA-p1-CDS1,TcCLB.505941.49:mRNA-p1-CDS1,TcCLB.505941.40:mRNA-p1-CDS1,TcCLB.505941.30:mRNA-p1-CDS1,TcCLB.505941.10:mRNA-p1-CDS1,TcCLB.506867.40:mRNA-p1-CDS1,TcCLB.506867.30:mRNA-p1-CDS1,TcCLB.506867.20:mRNA-p1-CDS1,TcCLB…
TcChr12-S	305013	307013	origins	CDS	ID=TcCLB.503897.90:mRNA-p1-CDS1;Parent=TcCLB.503897.90:mRNA;gene_id=TcCLB.503897.90;protein_source_id=TcCLB.503897.90:mRNA-p1
TcChr12-S	305013	307013	origins	exon	ID=exon_TcCLB.503897.90:mRNA-E1;Parent=TcCLB.503897.90:mRNA;gene_id=TcCLB.503897.90
TcChr12-S	305013	307013	origins	mRNA	ID=TcCLB.503897.90:mRNA;Parent=TcCLB.503897.90;description=hypothetical
TcChr12-S	305013	307013	origins	protein_coding_gene	ID=TcCLB.503897.90;description=hypothetical
TcChr12-S	305013	307013	origins	polycistron-CDS	ID=polycistron-CDS_15;contentCount=84;content=TcCLB.505943.50:mRNA-p1-CDS1,TcCLB.505943.40:mRNA-p1-CDS1,TcCLB.505943.30:mRNA-p1-CDS1,TcCLB.505943.20:mRNA-p1-CDS1,TcCLB.505943.10:mRNA-p1-CDS1,TcCLB.505941.49:mRNA-p1-CDS1,TcCLB.505941.40:mRNA-p1-CDS1,TcCLB.505941.30:mRNA-p1-CDS1,TcCLB.505941.10:mRNA-p1-CDS1,TcCLB.506867.40:mRNA-p1-CDS1,TcCLB.506867.30:mRNA-p1-CDS1,TcCLB.506867.20:mRNA-p1-CDS1,TcCLB…
TcChr12-S	313528	315528	origins	CDS	ID=TcCLB.503897.60:mRNA-p1-CDS1;Parent=TcCLB.503897.60:mRNA;gene_id=TcCLB.503897.60;protein_source_id=TcCLB.503897.60:mRNA-p1
TcChr12-S	313528	315528	origins	exon	ID=exon_TcCLB.503897.60:mRNA-E1;Parent=TcCLB.503897.60:mRNA;gene_id=TcCLB.503897.60
TcChr12-S	313528	315528	origins	mRNA	ID=TcCLB.503897.60:mRNA;Parent=TcCLB.503897.60;description=hypothetical
TcChr12-S	313528	315528	origins	protein_coding_gene	ID=TcCLB.503897.60;description=hypothetical
TcChr12-S	313528	315528	origins	polycistron-CDS	ID=polycistron-CDS_15;contentCount=84;content=TcCLB.505943.50:mRNA-p1-CDS1,TcCLB.505943.40:mRNA-p1-CDS1,TcCLB.505943.30:mRNA-p1-CDS1,TcCLB.505943.20:mRNA-p1-CDS1,TcCLB.505943.10:mRNA-p1-CDS1,TcCLB.505941.49:mRNA-p1-CDS1,TcCLB.505941.40:mRNA-p1-CDS1,TcCLB.505941.30:mRNA-p1-CDS1,TcCLB.505941.10:mRNA-p1-CDS1,TcCLB.506867.40:mRNA-p1-CDS1,TcCLB.506867.30:mRNA-p1-CDS1,TcCLB.506867.20:mRNA-p1-CDS1,TcCLB…
TcChr12-S	316686	318686	origins	CDS	ID=TcCLB.503897.50:mRNA-p1-CDS1;Parent=TcCLB.503897.50:mRNA;gene_id=TcCLB.503897.50;protein_source_id=TcCLB.503897.50:mRNA-p1
TcChr12-S	316686	318686	origins	exon	ID=exon_TcCLB.503897.50:mRNA-E1;Parent=TcCLB.503897.50:mRNA;gene_id=TcCLB.503897.50
TcChr12-S	316686	318686	origins	mRNA	ID=TcCLB.503897.50:mRNA;Parent=TcCLB.503897.50;description=hypothetical
TcChr12-S	316686	318686	origins	protein_coding_gene	ID=TcCLB.503897.50;description=hypothetical
TcChr12-S	316686	318686	origins	CDS	ID=TcCLB.503897.40:mRNA-p1-CDS1;Parent=TcCLB.503897.40:mRNA;gene_id=TcCLB.503897.40;protein_source_id=TcCLB.503897.40:mRNA-p1
TcChr12-S	316686	318686	origins	exon	ID=exon_TcCLB.503897.40:mRNA-E1;Parent=TcCLB.503897.40:mRNA;gene_id=TcCLB.503897.40
TcChr12-S	316686	318686	origins	mRNA	ID=TcCLB.503897.40:mRNA;Parent=TcCLB.503897.40;description=basal
TcChr12-S	316686	318686	origins	protein_coding_gene	ID=TcCLB.503897.40;description=basal
TcChr12-S	316686	318686	origins	polycistron-CDS	ID=polycistron-CDS_15;contentCount=84;content=TcCLB.505943.50:mRNA-p1-CDS1,TcCLB.505943.40:mRNA-p1-CDS1,TcCLB.505943.30:mRNA-p1-CDS1,TcCLB.505943.20:mRNA-p1-CDS1,TcCLB.505943.10:mRNA-p1-CDS1,TcCLB.505941.49:mRNA-p1-CDS1,TcCLB.505941.40:mRNA-p1-CDS1,TcCLB.505941.30:mRNA-p1-CDS1,TcCLB.505941.10:mRNA-p1-CDS1,TcCLB.506867.40:mRNA-p1-CDS1,TcCLB.506867.30:mRNA-p1-CDS1,TcCLB.506867.20:mRNA-p1-CDS1,TcCLB…
TcChr12-S	341725	343725	origins	CDS	ID=TcCLB.508987.20:mRNA-p1-CDS1;Parent=TcCLB.508987.20:mRNA;gene_id=TcCLB.508987.20;protein_source_id=TcCLB.508987.20:mRNA-p1
TcChr12-S	341725	343725	origins	exon	ID=exon_TcCLB.508987.20:mRNA-E1;Parent=TcCLB.508987.20:mRNA;gene_id=TcCLB.508987.20
TcChr12-S	341725	343725	origins	mRNA	ID=TcCLB.508987.20:mRNA;Parent=TcCLB.508987.20;description=hypothetical
TcChr12-S	341725	343725	origins	protein_coding_gene	ID=TcCLB.508987.20;description=hypothetical
TcChr12-S	341725	343725	origins	polycistron-CDS	ID=polycistron-CDS_15;contentCount=84;content=TcCLB.505943.50:mRNA-p1-CDS1,TcCLB.505943.40:mRNA-p1-CDS1,TcCLB.505943.30:mRNA-p1-CDS1,TcCLB.505943.20:mRNA-p1-CDS1,TcCLB.505943.10:mRNA-p1-CDS1,TcCLB.505941.49:mRNA-p1-CDS1,TcCLB.505941.40:mRNA-p1-CDS1,TcCLB.505941.30:mRNA-p1-CDS1,TcCLB.505941.10:mRNA-p1-CDS1,TcCLB.506867.40:mRNA-p1-CDS1,TcCLB.506867.30:mRNA-p1-CDS1,TcCLB.506867.20:mRNA-p1-CDS1,TcCLB…
TcChr12-S	349124	351124	origins	CDS	ID=TcCLB.508987.39:mRNA-p1-CDS1;Parent=TcCLB.508987.39:mRNA;gene_id=TcCLB.508987.39;protein_source_id=TcCLB.508987.39:mRNA-p1
TcChr12-S	349124	351124	origins	exon	ID=exon_TcCLB.508987.39:mRNA-E1;Parent=TcCLB.508987.39:mRNA;gene_id=TcCLB.508987.39
TcChr12-S	349124	351124	origins	mRNA	ID=TcCLB.508987.39:mRNA;Parent=TcCLB.508987.39;description=hypothetical
TcChr12-S	349124	351124	origins	protein_coding_gene	ID=TcCLB.508987.39;description=hypothetical
TcChr12-S	349124	351124	origins	CDS	ID=TcCLB.511407.10:mRNA-p1-CDS1;Parent=TcCLB.511407.10:mRNA;gene_id=TcCLB.511407.10;protein_source_id=TcCLB.511407.10:mRNA-p1
TcChr12-S	349124	351124	origins	exon	ID=exon_TcCLB.511407.10:mRNA-E1;Parent=TcCLB.511407.10:mRNA;gene_id=TcCLB.511407.10
TcChr12-S	349124	351124	origins	mRNA	ID=TcCLB.511407.10:mRNA;Parent=TcCLB.511407.10;description=nuclear
TcChr12-S	349124	351124	origins	protein_coding_gene	ID=TcCLB.511407.10;description=nuclear
TcChr12-S	349124	351124	origins	polycistron-CDS	ID=polycistron-CDS_15;contentCount=84;content=TcCLB.505943.50:mRNA-p1-CDS1,TcCLB.505943.40:mRNA-p1-CDS1,TcCLB.505943.30:mRNA-p1-CDS1,TcCLB.505943.20:mRNA-p1-CDS1,TcCLB.505943.10:mRNA-p1-CDS1,TcCLB.505941.49:mRNA-p1-CDS1,TcCLB.505941.40:mRNA-p1-CDS1,TcCLB.505941.30:mRNA-p1-CDS1,TcCLB.505941.10:mRNA-p1-CDS1,TcCLB.506867.40:mRNA-p1-CDS1,TcCLB.506867.30:mRNA-p1-CDS1,TcCLB.506867.20:mRNA-p1-CDS1,TcCLB…
TcChr12-S	356198	358198	origins	CDS	ID=TcCLB.511407.40:mRNA-p1-CDS1;Parent=TcCLB.511407.40:mRNA;gene_id=TcCLB.511407.40;protein_source_id=TcCLB.511407.40:mRNA-p1
TcChr12-S	356198	358198	origins	exon	ID=exon_TcCLB.511407.40:mRNA-E1;Parent=TcCLB.511407.40:mRNA;gene_id=TcCLB.511407.40
TcChr12-S	356198	358198	origins	mRNA	ID=TcCLB.511407.40:mRNA;Parent=TcCLB.511407.40;description=hypothetical
TcChr12-S	356198	358198	origins	protein_coding_gene	ID=TcCLB.511407.40;description=hypothetical
TcChr12-S	356198	358198	origins	polycistron-CDS	ID=polycistron-CDS_15;contentCount=84;content=TcCLB.505943.50:mRNA-p1-CDS1,TcCLB.505943.40:mRNA-p1-CDS1,TcCLB.505943.30:mRNA-p1-CDS1,TcCLB.505943.20:mRNA-p1-CDS1,TcCLB.505943.10:mRNA-p1-CDS1,TcCLB.505941.49:mRNA-p1-CDS1,TcCLB.505941.40:mRNA-p1-CDS1,TcCLB.505941.30:mRNA-p1-CDS1,TcCLB.505941.10:mRNA-p1-CDS1,TcCLB.506867.40:mRNA-p1-CDS1,TcCLB.506867.30:mRNA-p1-CDS1,TcCLB.506867.20:mRNA-p1-CDS1,TcCLB…
TcChr12-S	359867	361867	origins	CDS	ID=TcCLB.511407.50:mRNA-p1-CDS1;Parent=TcCLB.511407.50:mRNA;gene_id=TcCLB.511407.50;protein_source_id=TcCLB.511407.50:mRNA-p1
TcChr12-S	359867	361867	origins	exon	ID=exon_TcCLB.511407.50:mRNA-E1;Parent=TcCLB.511407.50:mRNA;gene_id=TcCLB.511407.50
TcChr12-S	359867	361867	origins	mRNA	ID=TcCLB.511407.50:mRNA;Parent=TcCLB.511407.50;description=hypothetical
TcChr12-S	359867	361867	origins	protein_coding_gene	ID=TcCLB.511407.50;description=hypothetical
TcChr12-S	359867	361867	origins	polycistron-CDS	ID=polycistron-CDS_15;contentCount=84;content=TcCLB.505943.50:mRNA-p1-CDS1,TcCLB.505943.40:mRNA-p1-CDS1,TcCLB.505943.30:mRNA-p1-CDS1,TcCLB.505943.20:mRNA-p1-CDS1,TcCLB.505943.10:mRNA-p1-CDS1,TcCLB.505941.49:mRNA-p1-CDS1,TcCLB.505941.40:mRNA-p1-CDS1,TcCLB.505941.30:mRNA-p1-CDS1,TcCLB.505941.10:mRNA-p1-CDS1,TcCLB.506867.40:mRNA-p1-CDS1,TcCLB.506867.30:mRNA-p1-CDS1,TcCLB.506867.20:mRNA-p1-CDS1,TcCLB…
TcChr12-S	370194	372194	origins	CDS	ID=TcCLB.511407.80:mRNA-p1-CDS1;Parent=TcCLB.511407.80:mRNA;gene_id=TcCLB.511407.80;protein_source_id=TcCLB.511407.80:mRNA-p1
TcChr12-S	370194	372194	origins	exon	ID=exon_TcCLB.511407.80:mRNA-E1;Parent=TcCLB.511407.80:mRNA;gene_id=TcCLB.511407.80
TcChr12-S	370194	372194	origins	mRNA	ID=TcCLB.511407.80:mRNA;Parent=TcCLB.511407.80;description=hypothetical
TcChr12-S	370194	372194	origins	protein_coding_gene	ID=TcCLB.511407.80;description=hypothetical
TcChr12-S	370194	372194	origins	polycistron-CDS	ID=polycistron-CDS_15;contentCount=84;content=TcCLB.505943.50:mRNA-p1-CDS1,TcCLB.505943.40:mRNA-p1-CDS1,TcCLB.505943.30:mRNA-p1-CDS1,TcCLB.505943.20:mRNA-p1-CDS1,TcCLB.505943.10:mRNA-p1-CDS1,TcCLB.505941.49:mRNA-p1-CDS1,TcCLB.505941.40:mRNA-p1-CDS1,TcCLB.505941.30:mRNA-p1-CDS1,TcCLB.505941.10:mRNA-p1-CDS1,TcCLB.506867.40:mRNA-p1-CDS1,TcCLB.506867.30:mRNA-p1-CDS1,TcCLB.506867.20:mRNA-p1-CDS1,TcCLB…
TcChr12-S	376927	378927	origins	CDS	ID=TcCLB.506865.70:mRNA-p1-CDS1;Parent=TcCLB.506865.70:mRNA;gene_id=TcCLB.506865.70;protein_source_id=TcCLB.506865.70:mRNA-p1
TcChr12-S	376927	378927	origins	exon	ID=exon_TcCLB.506865.70:mRNA-E1;Parent=TcCLB.506865.70:mRNA;gene_id=TcCLB.506865.70
TcChr12-S	376927	378927	origins	mRNA	ID=TcCLB.506865.70:mRNA;Parent=TcCLB.506865.70;description=hypothetical
TcChr12-S	376927	378927	origins	protein_coding_gene	ID=TcCLB.506865.70;description=hypothetical
TcChr12-S	376927	378927	origins	polycistron-CDS	ID=polycistron-CDS_15;contentCount=84;content=TcCLB.505943.50:mRNA-p1-CDS1,TcCLB.505943.40:mRNA-p1-CDS1,TcCLB.505943.30:mRNA-p1-CDS1,TcCLB.505943.20:mRNA-p1-CDS1,TcCLB.505943.10:mRNA-p1-CDS1,TcCLB.505941.49:mRNA-p1-CDS1,TcCLB.505941.40:mRNA-p1-CDS1,TcCLB.505941.30:mRNA-p1-CDS1,TcCLB.505941.10:mRNA-p1-CDS1,TcCLB.506867.40:mRNA-p1-CDS1,TcCLB.506867.30:mRNA-p1-CDS1,TcCLB.506867.20:mRNA-p1-CDS1,TcCLB…
TcChr12-S	384625	386625	origins	CDS	ID=TcCLB.506865.40:mRNA-p1-CDS1;Parent=TcCLB.506865.40:mRNA;gene_id=TcCLB.506865.40;protein_source_id=TcCLB.506865.40:mRNA-p1
TcChr12-S	384625	386625	origins	exon	ID=exon_TcCLB.506865.40:mRNA-E1;Parent=TcCLB.506865.40:mRNA;gene_id=TcCLB.506865.40
TcChr12-S	384625	386625	origins	mRNA	ID=TcCLB.506865.40:mRNA;Parent=TcCLB.506865.40;description=translation
TcChr12-S	384625	386625	origins	protein_coding_gene	ID=TcCLB.506865.40;description=translation
TcChr12-S	384625	386625	origins	CDS	ID=TcCLB.506865.30:mRNA-p1-CDS1;Parent=TcCLB.506865.30:mRNA;gene_id=TcCLB.506865.30;protein_source_id=TcCLB.506865.30:mRNA-p1
TcChr12-S	384625	386625	origins	exon	ID=exon_TcCLB.506865.30:mRNA-E1;Parent=TcCLB.506865.30:mRNA;gene_id=TcCLB.506865.30
TcChr12-S	384625	386625	origins	mRNA	ID=TcCLB.506865.30:mRNA;Parent=TcCLB.506865.30;description=hypothetical
TcChr12-S	384625	386625	origins	protein_coding_gene	ID=TcCLB.506865.30;description=hypothetical
TcChr12-S	384625	386625	origins	polycistron-CDS	ID=polycistron-CDS_15;contentCount=84;content=TcCLB.505943.50:mRNA-p1-CDS1,TcCLB.505943.40:mRNA-p1-CDS1,TcCLB.505943.30:mRNA-p1-CDS1,TcCLB.505943.20:mRNA-p1-CDS1,TcCLB.505943.10:mRNA-p1-CDS1,TcCLB.505941.49:mRNA-p1-CDS1,TcCLB.505941.40:mRNA-p1-CDS1,TcCLB.505941.30:mRNA-p1-CDS1,TcCLB.505941.10:mRNA-p1-CDS1,TcCLB.506867.40:mRNA-p1-CDS1,TcCLB.506867.30:mRNA-p1-CDS1,TcCLB.506867.20:mRNA-p1-CDS1,TcCLB…
TcChr12-S	394845	396845	origins	CDS	ID=TcCLB.508989.20:mRNA-p1-CDS1;Parent=TcCLB.508989.20:mRNA;gene_id=TcCLB.508989.20;protein_source_id=TcCLB.508989.20:mRNA-p1
TcChr12-S	394845	396845	origins	exon	ID=exon_TcCLB.508989.20:mRNA-E1;Parent=TcCLB.508989.20:mRNA;gene_id=TcCLB.508989.20
TcChr12-S	394845	396845	origins	mRNA	ID=TcCLB.508989.20:mRNA;Parent=TcCLB.508989.20;description=carrier
TcChr12-S	394845	396845	origins	protein_coding_gene	ID=TcCLB.508989.20;description=carrier
TcChr12-S	394845	396845	origins	CDS	ID=TcCLB.508989.30:mRNA-p1-CDS1;Parent=TcCLB.508989.30:mRNA;gene_id=TcCLB.508989.30;protein_source_id=TcCLB.508989.30:mRNA-p1
TcChr12-S	394845	396845	origins	exon	ID=exon_TcCLB.508989.30:mRNA-E1;Parent=TcCLB.508989.30:mRNA;gene_id=TcCLB.508989.30
TcChr12-S	394845	396845	origins	mRNA	ID=TcCLB.508989.30:mRNA;Parent=TcCLB.508989.30;description=RNA-binding
TcChr12-S	394845	396845	origins	protein_coding_gene	ID=TcCLB.508989.30;description=RNA-binding
TcChr12-S	394845	396845	origins	polycistron-CDS	ID=polycistron-CDS_15;contentCount=84;content=TcCLB.505943.50:mRNA-p1-CDS1,TcCLB.505943.40:mRNA-p1-CDS1,TcCLB.505943.30:mRNA-p1-CDS1,TcCLB.505943.20:mRNA-p1-CDS1,TcCLB.505943.10:mRNA-p1-CDS1,TcCLB.505941.49:mRNA-p1-CDS1,TcCLB.505941.40:mRNA-p1-CDS1,TcCLB.505941.30:mRNA-p1-CDS1,TcCLB.505941.10:mRNA-p1-CDS1,TcCLB.506867.40:mRNA-p1-CDS1,TcCLB.506867.30:mRNA-p1-CDS1,TcCLB.506867.20:mRNA-p1-CDS1,TcCLB…
TcChr12-S	400917	402917	origins	CDS	ID=TcCLB.508989.50:mRNA-p1-CDS1;Parent=TcCLB.508989.50:mRNA;gene_id=TcCLB.508989.50;protein_source_id=TcCLB.508989.50:mRNA-p1
TcChr12-S	400917	402917	origins	exon	ID=exon_TcCLB.508989.50:mRNA-E1;Parent=TcCLB.508989.50:mRNA;gene_id=TcCLB.508989.50
TcChr12-S	400917	402917	origins	mRNA	ID=TcCLB.508989.50:mRNA;Parent=TcCLB.508989.50;description=Domain
TcChr12-S	400917	402917	origins	protein_coding_gene	ID=TcCLB.508989.50;description=Domain
TcChr12-S	400917	402917	origins	CDS	ID=TcCLB.508989.60:mRNA-p1-CDS1;Parent=TcCLB.508989.60:mRNA;gene_id=TcCLB.508989.60;protein_source_id=TcCLB.508989.60:mRNA-p1
TcChr12-S	400917	402917	origins	exon	ID=exon_TcCLB.508989.60:mRNA-E1;Parent=TcCLB.508989.60:mRNA;gene_id=TcCLB.508989.60
TcChr12-S	400917	402917	origins	mRNA	ID=TcCLB.508989.60:mRNA;Parent=TcCLB.508989.60;description=chaperone
TcChr12-S	400917	402917	origins	protein_coding_gene	ID=TcCLB.508989.60;Name=J40;description=chaperone
TcChr12-S	400917	402917	origins	CDS	ID=TcCLB.508989.70:mRNA-p1-CDS1;Parent=TcCLB.508989.70:mRNA;gene_id=TcCLB.508989.70;protein_source_id=TcCLB.508989.70:mRNA-p1
TcChr12-S	400917	402917	origins	exon	ID=exon_TcCLB.508989.70:mRNA-E1;Parent=TcCLB.508989.70:mRNA;gene_id=TcCLB.508989.70
TcChr12-S	400917	402917	origins	mRNA	ID=TcCLB.508989.70:mRNA;Parent=TcCLB.508989.70;description=hypothetical
TcChr12-S	400917	402917	origins	protein_coding_gene	ID=TcCLB.508989.70;description=hypothetical
TcChr12-S	400917	402917	origins	polycistron-CDS	ID=polycistron-CDS_15;contentCount=84;content=TcCLB.505943.50:mRNA-p1-CDS1,TcCLB.505943.40:mRNA-p1-CDS1,TcCLB.505943.30:mRNA-p1-CDS1,TcCLB.505943.20:mRNA-p1-CDS1,TcCLB.505943.10:mRNA-p1-CDS1,TcCLB.505941.49:mRNA-p1-CDS1,TcCLB.505941.40:mRNA-p1-CDS1,TcCLB.505941.30:mRNA-p1-CDS1,TcCLB.505941.10:mRNA-p1-CDS1,TcCLB.506867.40:mRNA-p1-CDS1,TcCLB.506867.30:mRNA-p1-CDS1,TcCLB.506867.20:mRNA-p1-CDS1,TcCLB…
TcChr12-S	407254	409254	origins	CDS	ID=TcCLB.508989.90:mRNA-p1-CDS1;Parent=TcCLB.508989.90:mRNA;gene_id=TcCLB.508989.90;protein_source_id=TcCLB.508989.90:mRNA-p1
TcChr12-S	407254	409254	origins	exon	ID=exon_TcCLB.508989.90:mRNA-E1;Parent=TcCLB.508989.90:mRNA;gene_id=TcCLB.508989.90
TcChr12-S	407254	409254	origins	mRNA	ID=TcCLB.508989.90:mRNA;Parent=TcCLB.508989.90;description=Eukaryotic
TcChr12-S	407254	409254	origins	protein_coding_gene	ID=TcCLB.508989.90;Name=eif4g5;description=Eukaryotic
TcChr12-S	407254	409254	origins	polycistron-CDS	ID=polycistron-CDS_15;contentCount=84;content=TcCLB.505943.50:mRNA-p1-CDS1,TcCLB.505943.40:mRNA-p1-CDS1,TcCLB.505943.30:mRNA-p1-CDS1,TcCLB.505943.20:mRNA-p1-CDS1,TcCLB.505943.10:mRNA-p1-CDS1,TcCLB.505941.49:mRNA-p1-CDS1,TcCLB.505941.40:mRNA-p1-CDS1,TcCLB.505941.30:mRNA-p1-CDS1,TcCLB.505941.10:mRNA-p1-CDS1,TcCLB.506867.40:mRNA-p1-CDS1,TcCLB.506867.30:mRNA-p1-CDS1,TcCLB.506867.20:mRNA-p1-CDS1,TcCLB…
TcChr12-S	412633	414633	origins	CDS	ID=TcCLB.508989.100:mRNA-p1-CDS1;Parent=TcCLB.508989.100:mRNA;gene_id=TcCLB.508989.100;protein_source_id=TcCLB.508989.100:mRNA-p1
TcChr12-S	412633	414633	origins	exon	ID=exon_TcCLB.508989.100:mRNA-E1;Parent=TcCLB.508989.100:mRNA;gene_id=TcCLB.508989.100
TcChr12-S	412633	414633	origins	mRNA	ID=TcCLB.508989.100:mRNA;Parent=TcCLB.508989.100;description=Nucleoside
TcChr12-S	412633	414633	origins	protein_coding_gene	ID=TcCLB.508989.100;Name=NDPK4;description=Nucleoside
TcChr12-S	412633	414633	origins	polycistron-CDS	ID=polycistron-CDS_15;contentCount=84;content=TcCLB.505943.50:mRNA-p1-CDS1,TcCLB.505943.40:mRNA-p1-CDS1,TcCLB.505943.30:mRNA-p1-CDS1,TcCLB.505943.20:mRNA-p1-CDS1,TcCLB.505943.10:mRNA-p1-CDS1,TcCLB.505941.49:mRNA-p1-CDS1,TcCLB.505941.40:mRNA-p1-CDS1,TcCLB.505941.30:mRNA-p1-CDS1,TcCLB.505941.10:mRNA-p1-CDS1,TcCLB.506867.40:mRNA-p1-CDS1,TcCLB.506867.30:mRNA-p1-CDS1,TcCLB.506867.20:mRNA-p1-CDS1,TcCLB…
TcChr12-S	422793	424793	origins	CDS	ID=TcCLB.511409.20:mRNA-p1-CDS1;Parent=TcCLB.511409.20:mRNA;gene_id=TcCLB.511409.20;protein_source_id=TcCLB.511409.20:mRNA-p1
TcChr12-S	422793	424793	origins	exon	ID=exon_TcCLB.511409.20:mRNA-E1;Parent=TcCLB.511409.20:mRNA;gene_id=TcCLB.511409.20
TcChr12-S	422793	424793	origins	mRNA	ID=TcCLB.511409.20:mRNA;Parent=TcCLB.511409.20;description=Mitochondrial
TcChr12-S	422793	424793	origins	protein_coding_gene	ID=TcCLB.511409.20;Name=mS69;description=Mitochondrial
TcChr12-S	422793	424793	origins	CDS	ID=TcCLB.511409.30:mRNA-p1-CDS1;Parent=TcCLB.511409.30:mRNA;gene_id=TcCLB.511409.30;protein_source_id=TcCLB.511409.30:mRNA-p1
TcChr12-S	422793	424793	origins	exon	ID=exon_TcCLB.511409.30:mRNA-E1;Parent=TcCLB.511409.30:mRNA;gene_id=TcCLB.511409.30
TcChr12-S	422793	424793	origins	mRNA	ID=TcCLB.511409.30:mRNA;Parent=TcCLB.511409.30;description=hypothetical
TcChr12-S	422793	424793	origins	protein_coding_gene	ID=TcCLB.511409.30;description=hypothetical
TcChr12-S	422793	424793	origins	polycistron-CDS	ID=polycistron-CDS_15;contentCount=84;content=TcCLB.505943.50:mRNA-p1-CDS1,TcCLB.505943.40:mRNA-p1-CDS1,TcCLB.505943.30:mRNA-p1-CDS1,TcCLB.505943.20:mRNA-p1-CDS1,TcCLB.505943.10:mRNA-p1-CDS1,TcCLB.505941.49:mRNA-p1-CDS1,TcCLB.505941.40:mRNA-p1-CDS1,TcCLB.505941.30:mRNA-p1-CDS1,TcCLB.505941.10:mRNA-p1-CDS1,TcCLB.506867.40:mRNA-p1-CDS1,TcCLB.506867.30:mRNA-p1-CDS1,TcCLB.506867.20:mRNA-p1-CDS1,TcCLB…
TcChr12-S	427863	429863	origins	CDS	ID=TcCLB.511409.40:mRNA-p1-CDS1;Parent=TcCLB.511409.40:mRNA;gene_id=TcCLB.511409.40;protein_source_id=TcCLB.511409.40:mRNA-p1
TcChr12-S	427863	429863	origins	exon	ID=exon_TcCLB.511409.40:mRNA-E1;Parent=TcCLB.511409.40:mRNA;gene_id=TcCLB.511409.40
TcChr12-S	427863	429863	origins	mRNA	ID=TcCLB.511409.40:mRNA;Parent=TcCLB.511409.40;description=Zinc
TcChr12-S	427863	429863	origins	protein_coding_gene	ID=TcCLB.511409.40;description=Zinc
TcChr12-S	427863	429863	origins	CDS	ID=TcCLB.511409.50:mRNA-p1-CDS1;Parent=TcCLB.511409.50:mRNA;gene_id=TcCLB.511409.50;protein_source_id=TcCLB.511409.50:mRNA-p1
TcChr12-S	427863	429863	origins	exon	ID=exon_TcCLB.511409.50:mRNA-E1;Parent=TcCLB.511409.50:mRNA;gene_id=TcCLB.511409.50
TcChr12-S	427863	429863	origins	mRNA	ID=TcCLB.511409.50:mRNA;Parent=TcCLB.511409.50;description=Basal
TcChr12-S	427863	429863	origins	protein_coding_gene	ID=TcCLB.511409.50;description=Basal
TcChr12-S	427863	429863	origins	polycistron-CDS	ID=polycistron-CDS_15;contentCount=84;content=TcCLB.505943.50:mRNA-p1-CDS1,TcCLB.505943.40:mRNA-p1-CDS1,TcCLB.505943.30:mRNA-p1-CDS1,TcCLB.505943.20:mRNA-p1-CDS1,TcCLB.505943.10:mRNA-p1-CDS1,TcCLB.505941.49:mRNA-p1-CDS1,TcCLB.505941.40:mRNA-p1-CDS1,TcCLB.505941.30:mRNA-p1-CDS1,TcCLB.505941.10:mRNA-p1-CDS1,TcCLB.506867.40:mRNA-p1-CDS1,TcCLB.506867.30:mRNA-p1-CDS1,TcCLB.506867.20:mRNA-p1-CDS1,TcCLB…
TcChr12-S	433775	435775	origins	CDS	ID=TcCLB.511409.70:mRNA-p1-CDS1;Parent=TcCLB.511409.70:mRNA;gene_id=TcCLB.511409.70;protein_source_id=TcCLB.511409.70:mRNA-p1
TcChr12-S	433775	435775	origins	exon	ID=exon_TcCLB.511409.70:mRNA-E1;Parent=TcCLB.511409.70:mRNA;gene_id=TcCLB.511409.70
TcChr12-S	433775	435775	origins	mRNA	ID=TcCLB.511409.70:mRNA;Parent=TcCLB.511409.70;description=Zinc
TcChr12-S	433775	435775	origins	protein_coding_gene	ID=TcCLB.511409.70;description=Zinc
TcChr12-S	433775	435775	origins	CDS	ID=TcCLB.503689.4:mRNA-p1-CDS1;Parent=TcCLB.503689.4:mRNA;gene_id=TcCLB.503689.4;protein_source_id=TcCLB.503689.4:mRNA-p1
TcChr12-S	433775	435775	origins	exon	ID=exon_TcCLB.503689.4:mRNA-E1;Parent=TcCLB.503689.4:mRNA;gene_id=TcCLB.503689.4
TcChr12-S	433775	435775	origins	mRNA	ID=TcCLB.503689.4:mRNA;Parent=TcCLB.503689.4;description=Ras-related
TcChr12-S	433775	435775	origins	protein_coding_gene	ID=TcCLB.503689.4;Name=RABX1;description=Ras-related
TcChr12-S	433775	435775	origins	polycistron-CDS	ID=polycistron-CDS_15;contentCount=84;content=TcCLB.505943.50:mRNA-p1-CDS1,TcCLB.505943.40:mRNA-p1-CDS1,TcCLB.505943.30:mRNA-p1-CDS1,TcCLB.505943.20:mRNA-p1-CDS1,TcCLB.505943.10:mRNA-p1-CDS1,TcCLB.505941.49:mRNA-p1-CDS1,TcCLB.505941.40:mRNA-p1-CDS1,TcCLB.505941.30:mRNA-p1-CDS1,TcCLB.505941.10:mRNA-p1-CDS1,TcCLB.506867.40:mRNA-p1-CDS1,TcCLB.506867.30:mRNA-p1-CDS1,TcCLB.506867.20:mRNA-p1-CDS1,TcCLB…
TcChr12-S	448662	450662	origins	CDS	ID=TcCLB.511411.24:mRNA-p1-CDS1;Parent=TcCLB.511411.24:mRNA;gene_id=TcCLB.511411.24;protein_source_id=TcCLB.511411.24:mRNA-p1
TcChr12-S	448662	450662	origins	exon	ID=exon_TcCLB.511411.24:mRNA-E1;Parent=TcCLB.511411.24:mRNA;gene_id=TcCLB.511411.24
TcChr12-S	448662	450662	origins	mRNA	ID=TcCLB.511411.24:mRNA;Parent=TcCLB.511411.24;description=hypothetical
TcChr12-S	448662	450662	origins	protein_coding_gene	ID=TcCLB.511411.24;description=hypothetical
TcChr12-S	448662	450662	origins	polycistron-CDS	ID=polycistron-CDS_15;contentCount=84;content=TcCLB.505943.50:mRNA-p1-CDS1,TcCLB.505943.40:mRNA-p1-CDS1,TcCLB.505943.30:mRNA-p1-CDS1,TcCLB.505943.20:mRNA-p1-CDS1,TcCLB.505943.10:mRNA-p1-CDS1,TcCLB.505941.49:mRNA-p1-CDS1,TcCLB.505941.40:mRNA-p1-CDS1,TcCLB.505941.30:mRNA-p1-CDS1,TcCLB.505941.10:mRNA-p1-CDS1,TcCLB.506867.40:mRNA-p1-CDS1,TcCLB.506867.30:mRNA-p1-CDS1,TcCLB.506867.20:mRNA-p1-CDS1,TcCLB…
TcChr13-S	13356	15356	origins	CDS	ID=TcCLB.510165.110:mRNA-p1-CDS1;Parent=TcCLB.510165.110:mRNA;gene_id=TcCLB.510165.110;protein_source_id=TcCLB.510165.110:mRNA-p1
TcChr13-S	13356	15356	origins	exon	ID=exon_TcCLB.510165.110:mRNA-E1;Parent=TcCLB.510165.110:mRNA;gene_id=TcCLB.510165.110
TcChr13-S	13356	15356	origins	mRNA	ID=TcCLB.510165.110:mRNA;Parent=TcCLB.510165.110;description=retrotransposon
TcChr13-S	13356	15356	origins	protein_coding_gene	ID=TcCLB.510165.110;description=retrotransposon
TcChr13-S	13356	15356	origins	polycistron-CDS	ID=polycistron-CDS_17;contentCount=49;content=TcCLB.510165.110:mRNA-p1-CDS1,TcCLB.510165.60:mRNA-p1-CDS1,TcCLB.510165.54:mRNA-p1-CDS1,TcCLB.510165.50:mRNA-p1-CDS1,TcCLB.510165.40:mRNA-p1-CDS1,TcCLB.510165.30:mRNA-p1-CDS1,TcCLB.510165.20:mRNA-p1-CDS1,TcCLB.510165.10:mRNA-p1-CDS1,TcCLB.508085.20:mRNA-p1-CDS1,TcCLB.508085.10:mRNA-p1-CDS1,TcCLB.508321.11:mRNA-p1-CDS1,TcCLB.508321.21:mRNA-p1-CDS1,TcCL…
TcChr13-S	19048	21048	origins	exon	ID=exon_TcCLB.510165.90:pseudogenic_transcript-E1;Parent=TcCLB.510165.90:pseudogenic_transcript;gene_id=TcCLB.510165.90
TcChr13-S	19048	21048	origins	pseudogene	ID=TcCLB.510165.90;description=trans-sialidase
TcChr13-S	19048	21048	origins	pseudogenic_transcript	ID=TcCLB.510165.90:pseudogenic_transcript;Parent=TcCLB.510165.90;description=trans-sialidase
TcChr13-S	19048	21048	origins	polycistron-CDS	ID=polycistron-CDS_17;contentCount=49;content=TcCLB.510165.110:mRNA-p1-CDS1,TcCLB.510165.60:mRNA-p1-CDS1,TcCLB.510165.54:mRNA-p1-CDS1,TcCLB.510165.50:mRNA-p1-CDS1,TcCLB.510165.40:mRNA-p1-CDS1,TcCLB.510165.30:mRNA-p1-CDS1,TcCLB.510165.20:mRNA-p1-CDS1,TcCLB.510165.10:mRNA-p1-CDS1,TcCLB.508085.20:mRNA-p1-CDS1,TcCLB.508085.10:mRNA-p1-CDS1,TcCLB.508321.11:mRNA-p1-CDS1,TcCLB.508321.21:mRNA-p1-CDS1,TcCL…
TcChr13-S	23877	25877	origins	CDS	ID=TcCLB.510165.60:mRNA-p1-CDS1;Parent=TcCLB.510165.60:mRNA;gene_id=TcCLB.510165.60;protein_source_id=TcCLB.510165.60:mRNA-p1
TcChr13-S	23877	25877	origins	exon	ID=exon_TcCLB.510165.60:mRNA-E1;Parent=TcCLB.510165.60:mRNA;gene_id=TcCLB.510165.60
TcChr13-S	23877	25877	origins	mRNA	ID=TcCLB.510165.60:mRNA;Parent=TcCLB.510165.60;description=expression
TcChr13-S	23877	25877	origins	protein_coding_gene	ID=TcCLB.510165.60;description=expression
TcChr13-S	23877	25877	origins	polycistron-CDS	ID=polycistron-CDS_17;contentCount=49;content=TcCLB.510165.110:mRNA-p1-CDS1,TcCLB.510165.60:mRNA-p1-CDS1,TcCLB.510165.54:mRNA-p1-CDS1,TcCLB.510165.50:mRNA-p1-CDS1,TcCLB.510165.40:mRNA-p1-CDS1,TcCLB.510165.30:mRNA-p1-CDS1,TcCLB.510165.20:mRNA-p1-CDS1,TcCLB.510165.10:mRNA-p1-CDS1,TcCLB.508085.20:mRNA-p1-CDS1,TcCLB.508085.10:mRNA-p1-CDS1,TcCLB.508321.11:mRNA-p1-CDS1,TcCLB.508321.21:mRNA-p1-CDS1,TcCL…
TcChr13-S	27499	29499	origins	CDS	ID=TcCLB.510165.50:mRNA-p1-CDS1;Parent=TcCLB.510165.50:mRNA;gene_id=TcCLB.510165.50;protein_source_id=TcCLB.510165.50:mRNA-p1
TcChr13-S	27499	29499	origins	exon	ID=exon_TcCLB.510165.50:mRNA-E1;Parent=TcCLB.510165.50:mRNA;gene_id=TcCLB.510165.50
TcChr13-S	27499	29499	origins	mRNA	ID=TcCLB.510165.50:mRNA;Parent=TcCLB.510165.50;description=hypothetical
TcChr13-S	27499	29499	origins	protein_coding_gene	ID=TcCLB.510165.50;description=hypothetical
TcChr13-S	27499	29499	origins	CDS	ID=TcCLB.510165.40:mRNA-p1-CDS1;Parent=TcCLB.510165.40:mRNA;gene_id=TcCLB.510165.40;protein_source_id=TcCLB.510165.40:mRNA-p1
TcChr13-S	27499	29499	origins	exon	ID=exon_TcCLB.510165.40:mRNA-E1;Parent=TcCLB.510165.40:mRNA;gene_id=TcCLB.510165.40
TcChr13-S	27499	29499	origins	mRNA	ID=TcCLB.510165.40:mRNA;Parent=TcCLB.510165.40;description=hypothetical
TcChr13-S	27499	29499	origins	protein_coding_gene	ID=TcCLB.510165.40;description=hypothetical
TcChr13-S	27499	29499	origins	polycistron-CDS	ID=polycistron-CDS_17;contentCount=49;content=TcCLB.510165.110:mRNA-p1-CDS1,TcCLB.510165.60:mRNA-p1-CDS1,TcCLB.510165.54:mRNA-p1-CDS1,TcCLB.510165.50:mRNA-p1-CDS1,TcCLB.510165.40:mRNA-p1-CDS1,TcCLB.510165.30:mRNA-p1-CDS1,TcCLB.510165.20:mRNA-p1-CDS1,TcCLB.510165.10:mRNA-p1-CDS1,TcCLB.508085.20:mRNA-p1-CDS1,TcCLB.508085.10:mRNA-p1-CDS1,TcCLB.508321.11:mRNA-p1-CDS1,TcCLB.508321.21:mRNA-p1-CDS1,TcCL…
TcChr13-S	151231	153231	origins	CDS	ID=TcCLB.508321.50:mRNA-p1-CDS1;Parent=TcCLB.508321.50:mRNA;gene_id=TcCLB.508321.50;protein_source_id=TcCLB.508321.50:mRNA-p1
TcChr13-S	151231	153231	origins	exon	ID=exon_TcCLB.508321.50:mRNA-E1;Parent=TcCLB.508321.50:mRNA;gene_id=TcCLB.508321.50
TcChr13-S	151231	153231	origins	mRNA	ID=TcCLB.508321.50:mRNA;Parent=TcCLB.508321.50;description=hypothetical
TcChr13-S	151231	153231	origins	protein_coding_gene	ID=TcCLB.508321.50;description=hypothetical
TcChr13-S	151231	153231	origins	CDS	ID=TcCLB.508321.60:mRNA-p1-CDS1;Parent=TcCLB.508321.60:mRNA;gene_id=TcCLB.508321.60;protein_source_id=TcCLB.508321.60:mRNA-p1
TcChr13-S	151231	153231	origins	exon	ID=exon_TcCLB.508321.60:mRNA-E1;Parent=TcCLB.508321.60:mRNA;gene_id=TcCLB.508321.60
TcChr13-S	151231	153231	origins	mRNA	ID=TcCLB.508321.60:mRNA;Parent=TcCLB.508321.60;description=Dynamin
TcChr13-S	151231	153231	origins	protein_coding_gene	ID=TcCLB.508321.60;description=Dynamin
TcChr13-S	151231	153231	origins	polycistron-CDS	ID=polycistron-CDS_17;contentCount=49;content=TcCLB.510165.110:mRNA-p1-CDS1,TcCLB.510165.60:mRNA-p1-CDS1,TcCLB.510165.54:mRNA-p1-CDS1,TcCLB.510165.50:mRNA-p1-CDS1,TcCLB.510165.40:mRNA-p1-CDS1,TcCLB.510165.30:mRNA-p1-CDS1,TcCLB.510165.20:mRNA-p1-CDS1,TcCLB.510165.10:mRNA-p1-CDS1,TcCLB.508085.20:mRNA-p1-CDS1,TcCLB.508085.10:mRNA-p1-CDS1,TcCLB.508321.11:mRNA-p1-CDS1,TcCLB.508321.21:mRNA-p1-CDS1,TcCL…
TcChr13-S	156803	158803	origins	CDS	ID=TcCLB.506857.10:mRNA-p1-CDS1;Parent=TcCLB.506857.10:mRNA;gene_id=TcCLB.506857.10;protein_source_id=TcCLB.506857.10:mRNA-p1
TcChr13-S	156803	158803	origins	exon	ID=exon_TcCLB.506857.10:mRNA-E1;Parent=TcCLB.506857.10:mRNA;gene_id=TcCLB.506857.10
TcChr13-S	156803	158803	origins	mRNA	ID=TcCLB.506857.10:mRNA;Parent=TcCLB.506857.10;description=glycogen
TcChr13-S	156803	158803	origins	protein_coding_gene	ID=TcCLB.506857.10;Name=GSK3A;description=glycogen
TcChr13-S	156803	158803	origins	polycistron-CDS	ID=polycistron-CDS_17;contentCount=49;content=TcCLB.510165.110:mRNA-p1-CDS1,TcCLB.510165.60:mRNA-p1-CDS1,TcCLB.510165.54:mRNA-p1-CDS1,TcCLB.510165.50:mRNA-p1-CDS1,TcCLB.510165.40:mRNA-p1-CDS1,TcCLB.510165.30:mRNA-p1-CDS1,TcCLB.510165.20:mRNA-p1-CDS1,TcCLB.510165.10:mRNA-p1-CDS1,TcCLB.508085.20:mRNA-p1-CDS1,TcCLB.508085.10:mRNA-p1-CDS1,TcCLB.508321.11:mRNA-p1-CDS1,TcCLB.508321.21:mRNA-p1-CDS1,TcCL…
TcChr13-S	165174	167174	origins	CDS	ID=TcCLB.506857.50:mRNA-p1-CDS1;Parent=TcCLB.506857.50:mRNA;gene_id=TcCLB.506857.50;protein_source_id=TcCLB.506857.50:mRNA-p1
TcChr13-S	165174	167174	origins	exon	ID=exon_TcCLB.506857.50:mRNA-E1;Parent=TcCLB.506857.50:mRNA;gene_id=TcCLB.506857.50
TcChr13-S	165174	167174	origins	mRNA	ID=TcCLB.506857.50:mRNA;Parent=TcCLB.506857.50;description=hypothetical
TcChr13-S	165174	167174	origins	protein_coding_gene	ID=TcCLB.506857.50;description=hypothetical
TcChr13-S	165174	167174	origins	CDS	ID=TcCLB.506857.60:mRNA-p1-CDS1;Parent=TcCLB.506857.60:mRNA;gene_id=TcCLB.506857.60;protein_source_id=TcCLB.506857.60:mRNA-p1
TcChr13-S	165174	167174	origins	exon	ID=exon_TcCLB.506857.60:mRNA-E1;Parent=TcCLB.506857.60:mRNA;gene_id=TcCLB.506857.60
TcChr13-S	165174	167174	origins	mRNA	ID=TcCLB.506857.60:mRNA;Parent=TcCLB.506857.60;Note=5.2.1.8
TcChr13-S	165174	167174	origins	protein_coding_gene	ID=TcCLB.506857.60;Name=PAR45;description=peptidyl-prolyl
TcChr13-S	165174	167174	origins	polycistron-CDS	ID=polycistron-CDS_17;contentCount=49;content=TcCLB.510165.110:mRNA-p1-CDS1,TcCLB.510165.60:mRNA-p1-CDS1,TcCLB.510165.54:mRNA-p1-CDS1,TcCLB.510165.50:mRNA-p1-CDS1,TcCLB.510165.40:mRNA-p1-CDS1,TcCLB.510165.30:mRNA-p1-CDS1,TcCLB.510165.20:mRNA-p1-CDS1,TcCLB.510165.10:mRNA-p1-CDS1,TcCLB.508085.20:mRNA-p1-CDS1,TcCLB.508085.10:mRNA-p1-CDS1,TcCLB.508321.11:mRNA-p1-CDS1,TcCLB.508321.21:mRNA-p1-CDS1,TcCL…
TcChr13-S	170799	172799	origins	CDS	ID=TcCLB.506857.80:mRNA-p1-CDS1;Parent=TcCLB.506857.80:mRNA;gene_id=TcCLB.506857.80;protein_source_id=TcCLB.506857.80:mRNA-p1
TcChr13-S	170799	172799	origins	exon	ID=exon_TcCLB.506857.80:mRNA-E1;Parent=TcCLB.506857.80:mRNA;gene_id=TcCLB.506857.80
TcChr13-S	170799	172799	origins	mRNA	ID=TcCLB.506857.80:mRNA;Parent=TcCLB.506857.80;description=kinesin%2C
TcChr13-S	170799	172799	origins	protein_coding_gene	ID=TcCLB.506857.80;description=kinesin%2C
TcChr13-S	170799	172799	origins	polycistron-CDS	ID=polycistron-CDS_17;contentCount=49;content=TcCLB.510165.110:mRNA-p1-CDS1,TcCLB.510165.60:mRNA-p1-CDS1,TcCLB.510165.54:mRNA-p1-CDS1,TcCLB.510165.50:mRNA-p1-CDS1,TcCLB.510165.40:mRNA-p1-CDS1,TcCLB.510165.30:mRNA-p1-CDS1,TcCLB.510165.20:mRNA-p1-CDS1,TcCLB.510165.10:mRNA-p1-CDS1,TcCLB.508085.20:mRNA-p1-CDS1,TcCLB.508085.10:mRNA-p1-CDS1,TcCLB.508321.11:mRNA-p1-CDS1,TcCLB.508321.21:mRNA-p1-CDS1,TcCL…
TcChr13-S	182682	184682	origins	CDS	ID=TcCLB.506859.20:mRNA-p1-CDS1;Parent=TcCLB.506859.20:mRNA;gene_id=TcCLB.506859.20;protein_source_id=TcCLB.506859.20:mRNA-p1
TcChr13-S	182682	184682	origins	exon	ID=exon_TcCLB.506859.20:mRNA-E1;Parent=TcCLB.506859.20:mRNA;gene_id=TcCLB.506859.20
TcChr13-S	182682	184682	origins	mRNA	ID=TcCLB.506859.20:mRNA;Parent=TcCLB.506859.20;description=proteasome
TcChr13-S	182682	184682	origins	protein_coding_gene	ID=TcCLB.506859.20;description=proteasome
TcChr13-S	182682	184682	origins	polycistron-CDS	ID=polycistron-CDS_17;contentCount=49;content=TcCLB.510165.110:mRNA-p1-CDS1,TcCLB.510165.60:mRNA-p1-CDS1,TcCLB.510165.54:mRNA-p1-CDS1,TcCLB.510165.50:mRNA-p1-CDS1,TcCLB.510165.40:mRNA-p1-CDS1,TcCLB.510165.30:mRNA-p1-CDS1,TcCLB.510165.20:mRNA-p1-CDS1,TcCLB.510165.10:mRNA-p1-CDS1,TcCLB.508085.20:mRNA-p1-CDS1,TcCLB.508085.10:mRNA-p1-CDS1,TcCLB.508321.11:mRNA-p1-CDS1,TcCLB.508321.21:mRNA-p1-CDS1,TcCL…
TcChr13-S	188772	190772	origins	CDS	ID=TcCLB.506859.49:mRNA-p1-CDS1;Parent=TcCLB.506859.49:mRNA;gene_id=TcCLB.506859.49;protein_source_id=TcCLB.506859.49:mRNA-p1
TcChr13-S	188772	190772	origins	exon	ID=exon_TcCLB.506859.49:mRNA-E1;Parent=TcCLB.506859.49:mRNA;gene_id=TcCLB.506859.49
TcChr13-S	188772	190772	origins	mRNA	ID=TcCLB.506859.49:mRNA;Parent=TcCLB.506859.49;description=hypothetical
TcChr13-S	188772	190772	origins	protein_coding_gene	ID=TcCLB.506859.49;description=hypothetical
TcChr13-S	188772	190772	origins	polycistron-CDS	ID=polycistron-CDS_17;contentCount=49;content=TcCLB.510165.110:mRNA-p1-CDS1,TcCLB.510165.60:mRNA-p1-CDS1,TcCLB.510165.54:mRNA-p1-CDS1,TcCLB.510165.50:mRNA-p1-CDS1,TcCLB.510165.40:mRNA-p1-CDS1,TcCLB.510165.30:mRNA-p1-CDS1,TcCLB.510165.20:mRNA-p1-CDS1,TcCLB.510165.10:mRNA-p1-CDS1,TcCLB.508085.20:mRNA-p1-CDS1,TcCLB.508085.10:mRNA-p1-CDS1,TcCLB.508321.11:mRNA-p1-CDS1,TcCLB.508321.21:mRNA-p1-CDS1,TcCL…
TcChr13-S	192873	194873	origins	CDS	ID=TcCLB.506859.80:mRNA-p1-CDS1;Parent=TcCLB.506859.80:mRNA;gene_id=TcCLB.506859.80;protein_source_id=TcCLB.506859.80:mRNA-p1
TcChr13-S	192873	194873	origins	exon	ID=exon_TcCLB.506859.80:mRNA-E1;Parent=TcCLB.506859.80:mRNA;gene_id=TcCLB.506859.80
TcChr13-S	192873	194873	origins	mRNA	ID=TcCLB.506859.80:mRNA;Parent=TcCLB.506859.80;description=hypothetical
TcChr13-S	192873	194873	origins	protein_coding_gene	ID=TcCLB.506859.80;description=hypothetical
TcChr13-S	192873	194873	origins	polycistron-CDS	ID=polycistron-CDS_17;contentCount=49;content=TcCLB.510165.110:mRNA-p1-CDS1,TcCLB.510165.60:mRNA-p1-CDS1,TcCLB.510165.54:mRNA-p1-CDS1,TcCLB.510165.50:mRNA-p1-CDS1,TcCLB.510165.40:mRNA-p1-CDS1,TcCLB.510165.30:mRNA-p1-CDS1,TcCLB.510165.20:mRNA-p1-CDS1,TcCLB.510165.10:mRNA-p1-CDS1,TcCLB.508085.20:mRNA-p1-CDS1,TcCLB.508085.10:mRNA-p1-CDS1,TcCLB.508321.11:mRNA-p1-CDS1,TcCLB.508321.21:mRNA-p1-CDS1,TcCL…
TcChr13-S	198173	200173	origins	CDS	ID=TcCLB.506859.110:mRNA-p1-CDS1;Parent=TcCLB.506859.110:mRNA;gene_id=TcCLB.506859.110;protein_source_id=TcCLB.506859.110:mRNA-p1
TcChr13-S	198173	200173	origins	exon	ID=exon_TcCLB.506859.110:mRNA-E1;Parent=TcCLB.506859.110:mRNA;gene_id=TcCLB.506859.110
TcChr13-S	198173	200173	origins	mRNA	ID=TcCLB.506859.110:mRNA;Parent=TcCLB.506859.110;description=3'a2rel-related
TcChr13-S	198173	200173	origins	protein_coding_gene	ID=TcCLB.506859.110;description=3'a2rel-related
TcChr13-S	198173	200173	origins	CDS	ID=TcCLB.506859.120:mRNA-p1-CDS1;Parent=TcCLB.506859.120:mRNA;gene_id=TcCLB.506859.120;protein_source_id=TcCLB.506859.120:mRNA-p1
TcChr13-S	198173	200173	origins	exon	ID=exon_TcCLB.506859.120:mRNA-E1;Parent=TcCLB.506859.120:mRNA;gene_id=TcCLB.506859.120
TcChr13-S	198173	200173	origins	mRNA	ID=TcCLB.506859.120:mRNA;Parent=TcCLB.506859.120;description=hypothetical
TcChr13-S	198173	200173	origins	protein_coding_gene	ID=TcCLB.506859.120;description=hypothetical
TcChr13-S	198173	200173	origins	polycistron-CDS	ID=polycistron-CDS_17;contentCount=49;content=TcCLB.510165.110:mRNA-p1-CDS1,TcCLB.510165.60:mRNA-p1-CDS1,TcCLB.510165.54:mRNA-p1-CDS1,TcCLB.510165.50:mRNA-p1-CDS1,TcCLB.510165.40:mRNA-p1-CDS1,TcCLB.510165.30:mRNA-p1-CDS1,TcCLB.510165.20:mRNA-p1-CDS1,TcCLB.510165.10:mRNA-p1-CDS1,TcCLB.508085.20:mRNA-p1-CDS1,TcCLB.508085.10:mRNA-p1-CDS1,TcCLB.508321.11:mRNA-p1-CDS1,TcCLB.508321.21:mRNA-p1-CDS1,TcCL…
TcChr13-S	204896	206896	origins	CDS	ID=TcCLB.506859.150:mRNA-p1-CDS1;Parent=TcCLB.506859.150:mRNA;gene_id=TcCLB.506859.150;protein_source_id=TcCLB.506859.150:mRNA-p1
TcChr13-S	204896	206896	origins	exon	ID=exon_TcCLB.506859.150:mRNA-E1;Parent=TcCLB.506859.150:mRNA;gene_id=TcCLB.506859.150
TcChr13-S	204896	206896	origins	mRNA	ID=TcCLB.506859.150:mRNA;Parent=TcCLB.506859.150;description=hypothetical
TcChr13-S	204896	206896	origins	protein_coding_gene	ID=TcCLB.506859.150;description=hypothetical
TcChr13-S	204896	206896	origins	polycistron-CDS	ID=polycistron-CDS_17;contentCount=49;content=TcCLB.510165.110:mRNA-p1-CDS1,TcCLB.510165.60:mRNA-p1-CDS1,TcCLB.510165.54:mRNA-p1-CDS1,TcCLB.510165.50:mRNA-p1-CDS1,TcCLB.510165.40:mRNA-p1-CDS1,TcCLB.510165.30:mRNA-p1-CDS1,TcCLB.510165.20:mRNA-p1-CDS1,TcCLB.510165.10:mRNA-p1-CDS1,TcCLB.508085.20:mRNA-p1-CDS1,TcCLB.508085.10:mRNA-p1-CDS1,TcCLB.508321.11:mRNA-p1-CDS1,TcCLB.508321.21:mRNA-p1-CDS1,TcCL…
TcChr13-S	213485	215485	origins	CDS	ID=TcCLB.506859.170:mRNA-p1-CDS1;Parent=TcCLB.506859.170:mRNA;gene_id=TcCLB.506859.170;protein_source_id=TcCLB.506859.170:mRNA-p1
TcChr13-S	213485	215485	origins	exon	ID=exon_TcCLB.506859.170:mRNA-E1;Parent=TcCLB.506859.170:mRNA;gene_id=TcCLB.506859.170
TcChr13-S	213485	215485	origins	mRNA	ID=TcCLB.506859.170:mRNA;Parent=TcCLB.506859.170;description=cytoskeleton
TcChr13-S	213485	215485	origins	protein_coding_gene	ID=TcCLB.506859.170;description=cytoskeleton
TcChr13-S	213485	215485	origins	polycistron-CDS	ID=polycistron-CDS_17;contentCount=49;content=TcCLB.510165.110:mRNA-p1-CDS1,TcCLB.510165.60:mRNA-p1-CDS1,TcCLB.510165.54:mRNA-p1-CDS1,TcCLB.510165.50:mRNA-p1-CDS1,TcCLB.510165.40:mRNA-p1-CDS1,TcCLB.510165.30:mRNA-p1-CDS1,TcCLB.510165.20:mRNA-p1-CDS1,TcCLB.510165.10:mRNA-p1-CDS1,TcCLB.508085.20:mRNA-p1-CDS1,TcCLB.508085.10:mRNA-p1-CDS1,TcCLB.508321.11:mRNA-p1-CDS1,TcCLB.508321.21:mRNA-p1-CDS1,TcCL…
TcChr13-S	218391	220391	origins	polycistron-CDS	ID=polycistron-CDS_17;contentCount=49;content=TcCLB.510165.110:mRNA-p1-CDS1,TcCLB.510165.60:mRNA-p1-CDS1,TcCLB.510165.54:mRNA-p1-CDS1,TcCLB.510165.50:mRNA-p1-CDS1,TcCLB.510165.40:mRNA-p1-CDS1,TcCLB.510165.30:mRNA-p1-CDS1,TcCLB.510165.20:mRNA-p1-CDS1,TcCLB.510165.10:mRNA-p1-CDS1,TcCLB.508085.20:mRNA-p1-CDS1,TcCLB.508085.10:mRNA-p1-CDS1,TcCLB.508321.11:mRNA-p1-CDS1,TcCLB.508321.21:mRNA-p1-CDS1,TcCL…
TcChr13-S	232501	234501	origins	polycistron-CDS	ID=polycistron-CDS_17;contentCount=49;content=TcCLB.510165.110:mRNA-p1-CDS1,TcCLB.510165.60:mRNA-p1-CDS1,TcCLB.510165.54:mRNA-p1-CDS1,TcCLB.510165.50:mRNA-p1-CDS1,TcCLB.510165.40:mRNA-p1-CDS1,TcCLB.510165.30:mRNA-p1-CDS1,TcCLB.510165.20:mRNA-p1-CDS1,TcCLB.510165.10:mRNA-p1-CDS1,TcCLB.508085.20:mRNA-p1-CDS1,TcCLB.508085.10:mRNA-p1-CDS1,TcCLB.508321.11:mRNA-p1-CDS1,TcCLB.508321.21:mRNA-p1-CDS1,TcCL…
TcChr13-S	241189	243189	origins	exon	ID=exon_TcCLB.510523.10:pseudogenic_transcript-E1;Parent=TcCLB.510523.10:pseudogenic_transcript;gene_id=TcCLB.510523.10
TcChr13-S	241189	243189	origins	pseudogene	ID=TcCLB.510523.10;description=translation
TcChr13-S	241189	243189	origins	pseudogenic_transcript	ID=TcCLB.510523.10:pseudogenic_transcript;Parent=TcCLB.510523.10;description=translation
TcChr13-S	241189	243189	origins	polycistron-CDS	ID=polycistron-CDS_17;contentCount=49;content=TcCLB.510165.110:mRNA-p1-CDS1,TcCLB.510165.60:mRNA-p1-CDS1,TcCLB.510165.54:mRNA-p1-CDS1,TcCLB.510165.50:mRNA-p1-CDS1,TcCLB.510165.40:mRNA-p1-CDS1,TcCLB.510165.30:mRNA-p1-CDS1,TcCLB.510165.20:mRNA-p1-CDS1,TcCLB.510165.10:mRNA-p1-CDS1,TcCLB.508085.20:mRNA-p1-CDS1,TcCLB.508085.10:mRNA-p1-CDS1,TcCLB.508321.11:mRNA-p1-CDS1,TcCLB.508321.21:mRNA-p1-CDS1,TcCL…
TcChr13-S	250008	252008	origins	CDS	ID=TcCLB.510525.30:mRNA-p1-CDS1;Parent=TcCLB.510525.30:mRNA;gene_id=TcCLB.510525.30;protein_source_id=TcCLB.510525.30:mRNA-p1
TcChr13-S	250008	252008	origins	exon	ID=exon_TcCLB.510525.30:mRNA-E1;Parent=TcCLB.510525.30:mRNA;gene_id=TcCLB.510525.30
TcChr13-S	250008	252008	origins	mRNA	ID=TcCLB.510525.30:mRNA;Parent=TcCLB.510525.30;description=hypothetical
TcChr13-S	250008	252008	origins	protein_coding_gene	ID=TcCLB.510525.30;description=hypothetical
TcChr13-S	250008	252008	origins	CDS	ID=TcCLB.510525.40:mRNA-p1-CDS1;Parent=TcCLB.510525.40:mRNA;gene_id=TcCLB.510525.40;protein_source_id=TcCLB.510525.40:mRNA-p1
TcChr13-S	250008	252008	origins	exon	ID=exon_TcCLB.510525.40:mRNA-E1;Parent=TcCLB.510525.40:mRNA;gene_id=TcCLB.510525.40
TcChr13-S	250008	252008	origins	mRNA	ID=TcCLB.510525.40:mRNA;Parent=TcCLB.510525.40;description=hypothetical
TcChr13-S	250008	252008	origins	protein_coding_gene	ID=TcCLB.510525.40;description=hypothetical
TcChr13-S	250008	252008	origins	polycistron-CDS	ID=polycistron-CDS_18;contentCount=42;content=TcCLB.510523.29:mRNA-p1-CDS1,TcCLB.510525.10:mRNA-p1-CDS1,TcCLB.510525.20:mRNA-p1-CDS1,TcCLB.510525.30:mRNA-p1-CDS1,TcCLB.510525.40:mRNA-p1-CDS1,TcCLB.510525.50:mRNA-p1-CDS1,TcCLB.510525.60:mRNA-p1-CDS1,TcCLB.510525.70:mRNA-p1-CDS1,TcCLB.510525.80:mRNA-p1-CDS1,TcCLB.510525.90:mRNA-p1-CDS1,TcCLB.510525.100:mRNA-p1-CDS1,TcCLB.510525.110:mRNA-p1-CDS1,TcC…
TcChr13-S	280225	282225	origins	CDS	ID=TcCLB.510529.20:mRNA-p1-CDS1;Parent=TcCLB.510529.20:mRNA;gene_id=TcCLB.510529.20;protein_source_id=TcCLB.510529.20:mRNA-p1
TcChr13-S	280225	282225	origins	exon	ID=exon_TcCLB.510529.20:mRNA-E1;Parent=TcCLB.510529.20:mRNA;gene_id=TcCLB.510529.20
TcChr13-S	280225	282225	origins	mRNA	ID=TcCLB.510529.20:mRNA;Parent=TcCLB.510529.20;description=F-box
TcChr13-S	280225	282225	origins	protein_coding_gene	ID=TcCLB.510529.20;description=F-box
TcChr13-S	280225	282225	origins	polycistron-CDS	ID=polycistron-CDS_18;contentCount=42;content=TcCLB.510523.29:mRNA-p1-CDS1,TcCLB.510525.10:mRNA-p1-CDS1,TcCLB.510525.20:mRNA-p1-CDS1,TcCLB.510525.30:mRNA-p1-CDS1,TcCLB.510525.40:mRNA-p1-CDS1,TcCLB.510525.50:mRNA-p1-CDS1,TcCLB.510525.60:mRNA-p1-CDS1,TcCLB.510525.70:mRNA-p1-CDS1,TcCLB.510525.80:mRNA-p1-CDS1,TcCLB.510525.90:mRNA-p1-CDS1,TcCLB.510525.100:mRNA-p1-CDS1,TcCLB.510525.110:mRNA-p1-CDS1,TcC…
TcChr13-S	288948	290948	origins	CDS	ID=TcCLB.510531.10:mRNA-p1-CDS1;Parent=TcCLB.510531.10:mRNA;gene_id=TcCLB.510531.10;protein_source_id=TcCLB.510531.10:mRNA-p1
TcChr13-S	288948	290948	origins	exon	ID=exon_TcCLB.510531.10:mRNA-E1;Parent=TcCLB.510531.10:mRNA;gene_id=TcCLB.510531.10
TcChr13-S	288948	290948	origins	mRNA	ID=TcCLB.510531.10:mRNA;Parent=TcCLB.510531.10;description=UAA
TcChr13-S	288948	290948	origins	protein_coding_gene	ID=TcCLB.510531.10;description=UAA
TcChr13-S	288948	290948	origins	polycistron-CDS	ID=polycistron-CDS_18;contentCount=42;content=TcCLB.510523.29:mRNA-p1-CDS1,TcCLB.510525.10:mRNA-p1-CDS1,TcCLB.510525.20:mRNA-p1-CDS1,TcCLB.510525.30:mRNA-p1-CDS1,TcCLB.510525.40:mRNA-p1-CDS1,TcCLB.510525.50:mRNA-p1-CDS1,TcCLB.510525.60:mRNA-p1-CDS1,TcCLB.510525.70:mRNA-p1-CDS1,TcCLB.510525.80:mRNA-p1-CDS1,TcCLB.510525.90:mRNA-p1-CDS1,TcCLB.510525.100:mRNA-p1-CDS1,TcCLB.510525.110:mRNA-p1-CDS1,TcC…
TcChr13-S	292015	294015	origins	CDS	ID=TcCLB.510531.20:mRNA-p1-CDS1;Parent=TcCLB.510531.20:mRNA;gene_id=TcCLB.510531.20;protein_source_id=TcCLB.510531.20:mRNA-p1
TcChr13-S	292015	294015	origins	exon	ID=exon_TcCLB.510531.20:mRNA-E1;Parent=TcCLB.510531.20:mRNA;gene_id=TcCLB.510531.20
TcChr13-S	292015	294015	origins	mRNA	ID=TcCLB.510531.20:mRNA;Parent=TcCLB.510531.20;description=Kinetochore
TcChr13-S	292015	294015	origins	protein_coding_gene	ID=TcCLB.510531.20;Name=KKIP4;description=Kinetochore
TcChr13-S	292015	294015	origins	polycistron-CDS	ID=polycistron-CDS_18;contentCount=42;content=TcCLB.510523.29:mRNA-p1-CDS1,TcCLB.510525.10:mRNA-p1-CDS1,TcCLB.510525.20:mRNA-p1-CDS1,TcCLB.510525.30:mRNA-p1-CDS1,TcCLB.510525.40:mRNA-p1-CDS1,TcCLB.510525.50:mRNA-p1-CDS1,TcCLB.510525.60:mRNA-p1-CDS1,TcCLB.510525.70:mRNA-p1-CDS1,TcCLB.510525.80:mRNA-p1-CDS1,TcCLB.510525.90:mRNA-p1-CDS1,TcCLB.510525.100:mRNA-p1-CDS1,TcCLB.510525.110:mRNA-p1-CDS1,TcC…
TcChr13-S	299214	301214	origins	CDS	ID=TcCLB.510531.40:mRNA-p1-CDS1;Parent=TcCLB.510531.40:mRNA;gene_id=TcCLB.510531.40;protein_source_id=TcCLB.510531.40:mRNA-p1
TcChr13-S	299214	301214	origins	exon	ID=exon_TcCLB.510531.40:mRNA-E1;Parent=TcCLB.510531.40:mRNA;gene_id=TcCLB.510531.40
TcChr13-S	299214	301214	origins	mRNA	ID=TcCLB.510531.40:mRNA;Parent=TcCLB.510531.40;description=Mitoribosomal
TcChr13-S	299214	301214	origins	protein_coding_gene	ID=TcCLB.510531.40;Name=mt-SAF9;description=Mitoribosomal
TcChr13-S	299214	301214	origins	CDS	ID=TcCLB.510531.50:mRNA-p1-CDS1;Parent=TcCLB.510531.50:mRNA;gene_id=TcCLB.510531.50;protein_source_id=TcCLB.510531.50:mRNA-p1
TcChr13-S	299214	301214	origins	exon	ID=exon_TcCLB.510531.50:mRNA-E1;Parent=TcCLB.510531.50:mRNA;gene_id=TcCLB.510531.50
TcChr13-S	299214	301214	origins	mRNA	ID=TcCLB.510531.50:mRNA;Parent=TcCLB.510531.50;description=hypothetical
TcChr13-S	299214	301214	origins	protein_coding_gene	ID=TcCLB.510531.50;description=hypothetical
TcChr13-S	299214	301214	origins	polycistron-CDS	ID=polycistron-CDS_18;contentCount=42;content=TcCLB.510523.29:mRNA-p1-CDS1,TcCLB.510525.10:mRNA-p1-CDS1,TcCLB.510525.20:mRNA-p1-CDS1,TcCLB.510525.30:mRNA-p1-CDS1,TcCLB.510525.40:mRNA-p1-CDS1,TcCLB.510525.50:mRNA-p1-CDS1,TcCLB.510525.60:mRNA-p1-CDS1,TcCLB.510525.70:mRNA-p1-CDS1,TcCLB.510525.80:mRNA-p1-CDS1,TcCLB.510525.90:mRNA-p1-CDS1,TcCLB.510525.100:mRNA-p1-CDS1,TcCLB.510525.110:mRNA-p1-CDS1,TcC…
TcChr13-S	306051	308051	origins	CDS	ID=TcCLB.510531.60:mRNA-p1-CDS1;Parent=TcCLB.510531.60:mRNA;gene_id=TcCLB.510531.60;protein_source_id=TcCLB.510531.60:mRNA-p1
TcChr13-S	306051	308051	origins	exon	ID=exon_TcCLB.510531.60:mRNA-E1;Parent=TcCLB.510531.60:mRNA;gene_id=TcCLB.510531.60
TcChr13-S	306051	308051	origins	mRNA	ID=TcCLB.510531.60:mRNA;Parent=TcCLB.510531.60;description=hypothetical
TcChr13-S	306051	308051	origins	protein_coding_gene	ID=TcCLB.510531.60;description=hypothetical
TcChr13-S	306051	308051	origins	polycistron-CDS	ID=polycistron-CDS_18;contentCount=42;content=TcCLB.510523.29:mRNA-p1-CDS1,TcCLB.510525.10:mRNA-p1-CDS1,TcCLB.510525.20:mRNA-p1-CDS1,TcCLB.510525.30:mRNA-p1-CDS1,TcCLB.510525.40:mRNA-p1-CDS1,TcCLB.510525.50:mRNA-p1-CDS1,TcCLB.510525.60:mRNA-p1-CDS1,TcCLB.510525.70:mRNA-p1-CDS1,TcCLB.510525.80:mRNA-p1-CDS1,TcCLB.510525.90:mRNA-p1-CDS1,TcCLB.510525.100:mRNA-p1-CDS1,TcCLB.510525.110:mRNA-p1-CDS1,TcC…
TcChr13-S	328112	330112	origins	CDS	ID=TcCLB.510533.10:mRNA-p1-CDS1;Parent=TcCLB.510533.10:mRNA;gene_id=TcCLB.510533.10;protein_source_id=TcCLB.510533.10:mRNA-p1
TcChr13-S	328112	330112	origins	exon	ID=exon_TcCLB.510533.10:mRNA-E1;Parent=TcCLB.510533.10:mRNA;gene_id=TcCLB.510533.10
TcChr13-S	328112	330112	origins	mRNA	ID=TcCLB.510533.10:mRNA;Parent=TcCLB.510533.10;description=Cytoplasmic
TcChr13-S	328112	330112	origins	protein_coding_gene	ID=TcCLB.510533.10;description=Cytoplasmic
TcChr13-S	328112	330112	origins	polycistron-CDS	ID=polycistron-CDS_18;contentCount=42;content=TcCLB.510523.29:mRNA-p1-CDS1,TcCLB.510525.10:mRNA-p1-CDS1,TcCLB.510525.20:mRNA-p1-CDS1,TcCLB.510525.30:mRNA-p1-CDS1,TcCLB.510525.40:mRNA-p1-CDS1,TcCLB.510525.50:mRNA-p1-CDS1,TcCLB.510525.60:mRNA-p1-CDS1,TcCLB.510525.70:mRNA-p1-CDS1,TcCLB.510525.80:mRNA-p1-CDS1,TcCLB.510525.90:mRNA-p1-CDS1,TcCLB.510525.100:mRNA-p1-CDS1,TcCLB.510525.110:mRNA-p1-CDS1,TcC…
TcChr13-S	332169	334169	origins	CDS	ID=TcCLB.510533.20:mRNA-p1-CDS1;Parent=TcCLB.510533.20:mRNA;gene_id=TcCLB.510533.20;protein_source_id=TcCLB.510533.20:mRNA-p1
TcChr13-S	332169	334169	origins	exon	ID=exon_TcCLB.510533.20:mRNA-E1;Parent=TcCLB.510533.20:mRNA;gene_id=TcCLB.510533.20
TcChr13-S	332169	334169	origins	mRNA	ID=TcCLB.510533.20:mRNA;Parent=TcCLB.510533.20;description=Beta-lactamase
TcChr13-S	332169	334169	origins	protein_coding_gene	ID=TcCLB.510533.20;description=Beta-lactamase
TcChr13-S	332169	334169	origins	CDS	ID=TcCLB.510533.10:mRNA-p1-CDS1;Parent=TcCLB.510533.10:mRNA;gene_id=TcCLB.510533.10;protein_source_id=TcCLB.510533.10:mRNA-p1
TcChr13-S	332169	334169	origins	exon	ID=exon_TcCLB.510533.10:mRNA-E1;Parent=TcCLB.510533.10:mRNA;gene_id=TcCLB.510533.10
TcChr13-S	332169	334169	origins	mRNA	ID=TcCLB.510533.10:mRNA;Parent=TcCLB.510533.10;description=Cytoplasmic
TcChr13-S	332169	334169	origins	protein_coding_gene	ID=TcCLB.510533.10;description=Cytoplasmic
TcChr13-S	332169	334169	origins	polycistron-CDS	ID=polycistron-CDS_18;contentCount=42;content=TcCLB.510523.29:mRNA-p1-CDS1,TcCLB.510525.10:mRNA-p1-CDS1,TcCLB.510525.20:mRNA-p1-CDS1,TcCLB.510525.30:mRNA-p1-CDS1,TcCLB.510525.40:mRNA-p1-CDS1,TcCLB.510525.50:mRNA-p1-CDS1,TcCLB.510525.60:mRNA-p1-CDS1,TcCLB.510525.70:mRNA-p1-CDS1,TcCLB.510525.80:mRNA-p1-CDS1,TcCLB.510525.90:mRNA-p1-CDS1,TcCLB.510525.100:mRNA-p1-CDS1,TcCLB.510525.110:mRNA-p1-CDS1,TcC…
TcChr13-S	341788	343788	origins	CDS	ID=TcCLB.510533.70:mRNA-p1-CDS1;Parent=TcCLB.510533.70:mRNA;gene_id=TcCLB.510533.70;protein_source_id=TcCLB.510533.70:mRNA-p1
TcChr13-S	341788	343788	origins	exon	ID=exon_TcCLB.510533.70:mRNA-E1;Parent=TcCLB.510533.70:mRNA;gene_id=TcCLB.510533.70
TcChr13-S	341788	343788	origins	mRNA	ID=TcCLB.510533.70:mRNA;Parent=TcCLB.510533.70;description=protein
TcChr13-S	341788	343788	origins	protein_coding_gene	ID=TcCLB.510533.70;description=protein
TcChr13-S	341788	343788	origins	CDS	ID=TcCLB.510533.80:mRNA-p1-CDS1;Parent=TcCLB.510533.80:mRNA;gene_id=TcCLB.510533.80;protein_source_id=TcCLB.510533.80:mRNA-p1
TcChr13-S	341788	343788	origins	exon	ID=exon_TcCLB.510533.80:mRNA-E1;Parent=TcCLB.510533.80:mRNA;gene_id=TcCLB.510533.80
TcChr13-S	341788	343788	origins	mRNA	ID=TcCLB.510533.80:mRNA;Parent=TcCLB.510533.80;description=ChaC-like
TcChr13-S	341788	343788	origins	protein_coding_gene	ID=TcCLB.510533.80;description=ChaC-like
TcChr13-S	341788	343788	origins	polycistron-CDS	ID=polycistron-CDS_18;contentCount=42;content=TcCLB.510523.29:mRNA-p1-CDS1,TcCLB.510525.10:mRNA-p1-CDS1,TcCLB.510525.20:mRNA-p1-CDS1,TcCLB.510525.30:mRNA-p1-CDS1,TcCLB.510525.40:mRNA-p1-CDS1,TcCLB.510525.50:mRNA-p1-CDS1,TcCLB.510525.60:mRNA-p1-CDS1,TcCLB.510525.70:mRNA-p1-CDS1,TcCLB.510525.80:mRNA-p1-CDS1,TcCLB.510525.90:mRNA-p1-CDS1,TcCLB.510525.100:mRNA-p1-CDS1,TcCLB.510525.110:mRNA-p1-CDS1,TcC…
TcChr13-S	356711	358711	origins	CDS	ID=TcCLB.510533.150:mRNA-p1-CDS1;Parent=TcCLB.510533.150:mRNA;gene_id=TcCLB.510533.150;protein_source_id=TcCLB.510533.150:mRNA-p1
TcChr13-S	356711	358711	origins	exon	ID=exon_TcCLB.510533.150:mRNA-E1;Parent=TcCLB.510533.150:mRNA;gene_id=TcCLB.510533.150
TcChr13-S	356711	358711	origins	mRNA	ID=TcCLB.510533.150:mRNA;Parent=TcCLB.510533.150;description=hypothetical
TcChr13-S	356711	358711	origins	protein_coding_gene	ID=TcCLB.510533.150;description=hypothetical
TcChr13-S	356711	358711	origins	polycistron-CDS	ID=polycistron-CDS_19;contentCount=24;content=TcCLB.510533.110:mRNA-p1-CDS1,TcCLB.510533.120:mRNA-p1-CDS1,TcCLB.510533.130:mRNA-p1-CDS1,TcCLB.510533.150:mRNA-p1-CDS1,TcCLB.510533.160:mRNA-p1-CDS1,TcCLB.510533.170:mRNA-p1-CDS1,TcCLB.510533.180:mRNA-p1-CDS1,TcCLB.510533.190:mRNA-p1-CDS1,TcCLB.510533.220:mRNA-p1-CDS1,TcCLB.510533.230:mRNA-p1-CDS1,TcCLB.508323.9:mRNA-p1-CDS1,TcCLB.508323.20:mRNA-p1-C…
TcChr13-S	366641	368641	origins	CDS	ID=TcCLB.510533.170:mRNA-p1-CDS1;Parent=TcCLB.510533.170:mRNA;gene_id=TcCLB.510533.170;protein_source_id=TcCLB.510533.170:mRNA-p1
TcChr13-S	366641	368641	origins	exon	ID=exon_TcCLB.510533.170:mRNA-E1;Parent=TcCLB.510533.170:mRNA;gene_id=TcCLB.510533.170
TcChr13-S	366641	368641	origins	mRNA	ID=TcCLB.510533.170:mRNA;Parent=TcCLB.510533.170;description=hypothetical
TcChr13-S	366641	368641	origins	protein_coding_gene	ID=TcCLB.510533.170;description=hypothetical
TcChr13-S	366641	368641	origins	CDS	ID=TcCLB.510533.180:mRNA-p1-CDS1;Parent=TcCLB.510533.180:mRNA;gene_id=TcCLB.510533.180;protein_source_id=TcCLB.510533.180:mRNA-p1
TcChr13-S	366641	368641	origins	exon	ID=exon_TcCLB.510533.180:mRNA-E1;Parent=TcCLB.510533.180:mRNA;gene_id=TcCLB.510533.180
TcChr13-S	366641	368641	origins	mRNA	ID=TcCLB.510533.180:mRNA;Parent=TcCLB.510533.180;description=microtubule-associated
TcChr13-S	366641	368641	origins	protein_coding_gene	ID=TcCLB.510533.180;description=microtubule-associated
TcChr13-S	366641	368641	origins	polycistron-CDS	ID=polycistron-CDS_19;contentCount=24;content=TcCLB.510533.110:mRNA-p1-CDS1,TcCLB.510533.120:mRNA-p1-CDS1,TcCLB.510533.130:mRNA-p1-CDS1,TcCLB.510533.150:mRNA-p1-CDS1,TcCLB.510533.160:mRNA-p1-CDS1,TcCLB.510533.170:mRNA-p1-CDS1,TcCLB.510533.180:mRNA-p1-CDS1,TcCLB.510533.190:mRNA-p1-CDS1,TcCLB.510533.220:mRNA-p1-CDS1,TcCLB.510533.230:mRNA-p1-CDS1,TcCLB.508323.9:mRNA-p1-CDS1,TcCLB.508323.20:mRNA-p1-C…
TcChr13-S	394538	396538	origins	CDS	ID=TcCLB.508323.40:mRNA-p1-CDS1;Parent=TcCLB.508323.40:mRNA;gene_id=TcCLB.508323.40;protein_source_id=TcCLB.508323.40:mRNA-p1
TcChr13-S	394538	396538	origins	exon	ID=exon_TcCLB.508323.40:mRNA-E1;Parent=TcCLB.508323.40:mRNA;gene_id=TcCLB.508323.40
TcChr13-S	394538	396538	origins	mRNA	ID=TcCLB.508323.40:mRNA;Parent=TcCLB.508323.40;description=hypothetical
TcChr13-S	394538	396538	origins	protein_coding_gene	ID=TcCLB.508323.40;description=hypothetical
TcChr13-S	394538	396538	origins	CDS	ID=TcCLB.508323.50:mRNA-p1-CDS1;Parent=TcCLB.508323.50:mRNA;gene_id=TcCLB.508323.50;protein_source_id=TcCLB.508323.50:mRNA-p1
TcChr13-S	394538	396538	origins	exon	ID=exon_TcCLB.508323.50:mRNA-E1;Parent=TcCLB.508323.50:mRNA;gene_id=TcCLB.508323.50
TcChr13-S	394538	396538	origins	mRNA	ID=TcCLB.508323.50:mRNA;Parent=TcCLB.508323.50;description=MORN
TcChr13-S	394538	396538	origins	protein_coding_gene	ID=TcCLB.508323.50;description=MORN
TcChr13-S	394538	396538	origins	polycistron-CDS	ID=polycistron-CDS_19;contentCount=24;content=TcCLB.510533.110:mRNA-p1-CDS1,TcCLB.510533.120:mRNA-p1-CDS1,TcCLB.510533.130:mRNA-p1-CDS1,TcCLB.510533.150:mRNA-p1-CDS1,TcCLB.510533.160:mRNA-p1-CDS1,TcCLB.510533.170:mRNA-p1-CDS1,TcCLB.510533.180:mRNA-p1-CDS1,TcCLB.510533.190:mRNA-p1-CDS1,TcCLB.510533.220:mRNA-p1-CDS1,TcCLB.510533.230:mRNA-p1-CDS1,TcCLB.508323.9:mRNA-p1-CDS1,TcCLB.508323.20:mRNA-p1-C…
TcChr13-S	417316	419316	origins	CDS	ID=TcCLB.508323.190:mRNA-p1-CDS1;Parent=TcCLB.508323.190:mRNA;gene_id=TcCLB.508323.190;protein_source_id=TcCLB.508323.190:mRNA-p1
TcChr13-S	417316	419316	origins	exon	ID=exon_TcCLB.508323.190:mRNA-E1;Parent=TcCLB.508323.190:mRNA;gene_id=TcCLB.508323.190
TcChr13-S	417316	419316	origins	mRNA	ID=TcCLB.508323.190:mRNA;Parent=TcCLB.508323.190;description=kinetoplastid-specific
TcChr13-S	417316	419316	origins	protein_coding_gene	ID=TcCLB.508323.190;description=kinetoplastid-specific
TcChr13-S	417316	419316	origins	CDS	ID=TcCLB.508323.199:mRNA-p1-CDS1;Parent=TcCLB.508323.199:mRNA;gene_id=TcCLB.508323.199;protein_source_id=TcCLB.508323.199:mRNA-p1
TcChr13-S	417316	419316	origins	exon	ID=exon_TcCLB.508323.199:mRNA-E1;Parent=TcCLB.508323.199:mRNA;gene_id=TcCLB.508323.199
TcChr13-S	417316	419316	origins	mRNA	ID=TcCLB.508323.199:mRNA;Parent=TcCLB.508323.199;description=ATP-dependent
TcChr13-S	417316	419316	origins	protein_coding_gene	ID=TcCLB.508323.199;description=ATP-dependent
TcChr13-S	417316	419316	origins	polycistron-CDS	ID=polycistron-CDS_20;contentCount=39;content=TcCLB.508323.190:mRNA-p1-CDS1,TcCLB.508323.199:mRNA-p1-CDS1,TcCLB.506861.10:mRNA-p1-CDS1,TcCLB.506861.20:mRNA-p1-CDS1,TcCLB.506861.30:mRNA-p1-CDS1,TcCLB.506861.39:mRNA-p1-CDS1,TcCLB.506863.4:mRNA-p1-CDS1,TcCLB.506863.10:mRNA-p1-CDS1,TcCLB.506863.20:mRNA-p1-CDS1,TcCLB.506863.30:mRNA-p1-CDS1,TcCLB.506863.40:mRNA-p1-CDS1,TcCLB.506863.50:mRNA-p1-CDS1,TcCL…
TcChr13-S	430852	432852	origins	CDS	ID=TcCLB.506863.20:mRNA-p1-CDS1;Parent=TcCLB.506863.20:mRNA;gene_id=TcCLB.506863.20;protein_source_id=TcCLB.506863.20:mRNA-p1
TcChr13-S	430852	432852	origins	exon	ID=exon_TcCLB.506863.20:mRNA-E1;Parent=TcCLB.506863.20:mRNA;gene_id=TcCLB.506863.20
TcChr13-S	430852	432852	origins	mRNA	ID=TcCLB.506863.20:mRNA;Parent=TcCLB.506863.20;description=hypothetical
TcChr13-S	430852	432852	origins	protein_coding_gene	ID=TcCLB.506863.20;description=hypothetical
TcChr13-S	430852	432852	origins	CDS	ID=TcCLB.506863.30:mRNA-p1-CDS1;Parent=TcCLB.506863.30:mRNA;gene_id=TcCLB.506863.30;protein_source_id=TcCLB.506863.30:mRNA-p1
TcChr13-S	430852	432852	origins	exon	ID=exon_TcCLB.506863.30:mRNA-E1;Parent=TcCLB.506863.30:mRNA;gene_id=TcCLB.506863.30
TcChr13-S	430852	432852	origins	mRNA	ID=TcCLB.506863.30:mRNA;Parent=TcCLB.506863.30;description=hypothetical
TcChr13-S	430852	432852	origins	protein_coding_gene	ID=TcCLB.506863.30;description=hypothetical
TcChr13-S	430852	432852	origins	polycistron-CDS	ID=polycistron-CDS_20;contentCount=39;content=TcCLB.508323.190:mRNA-p1-CDS1,TcCLB.508323.199:mRNA-p1-CDS1,TcCLB.506861.10:mRNA-p1-CDS1,TcCLB.506861.20:mRNA-p1-CDS1,TcCLB.506861.30:mRNA-p1-CDS1,TcCLB.506861.39:mRNA-p1-CDS1,TcCLB.506863.4:mRNA-p1-CDS1,TcCLB.506863.10:mRNA-p1-CDS1,TcCLB.506863.20:mRNA-p1-CDS1,TcCLB.506863.30:mRNA-p1-CDS1,TcCLB.506863.40:mRNA-p1-CDS1,TcCLB.506863.50:mRNA-p1-CDS1,TcCL…
TcChr13-S	436454	438454	origins	CDS	ID=TcCLB.506863.50:mRNA-p1-CDS1;Parent=TcCLB.506863.50:mRNA;gene_id=TcCLB.506863.50;protein_source_id=TcCLB.506863.50:mRNA-p1
TcChr13-S	436454	438454	origins	exon	ID=exon_TcCLB.506863.50:mRNA-E1;Parent=TcCLB.506863.50:mRNA;gene_id=TcCLB.506863.50
TcChr13-S	436454	438454	origins	mRNA	ID=TcCLB.506863.50:mRNA;Parent=TcCLB.506863.50;description=ribosomal
TcChr13-S	436454	438454	origins	protein_coding_gene	ID=TcCLB.506863.50;Name=RRP45;description=ribosomal
TcChr13-S	436454	438454	origins	CDS	ID=TcCLB.506863.60:mRNA-p1-CDS1;Parent=TcCLB.506863.60:mRNA;gene_id=TcCLB.506863.60;protein_source_id=TcCLB.506863.60:mRNA-p1
TcChr13-S	436454	438454	origins	exon	ID=exon_TcCLB.506863.60:mRNA-E1;Parent=TcCLB.506863.60:mRNA;gene_id=TcCLB.506863.60
TcChr13-S	436454	438454	origins	mRNA	ID=TcCLB.506863.60:mRNA;Parent=TcCLB.506863.60;description=hypothetical
TcChr13-S	436454	438454	origins	protein_coding_gene	ID=TcCLB.506863.60;description=hypothetical
TcChr13-S	436454	438454	origins	polycistron-CDS	ID=polycistron-CDS_20;contentCount=39;content=TcCLB.508323.190:mRNA-p1-CDS1,TcCLB.508323.199:mRNA-p1-CDS1,TcCLB.506861.10:mRNA-p1-CDS1,TcCLB.506861.20:mRNA-p1-CDS1,TcCLB.506861.30:mRNA-p1-CDS1,TcCLB.506861.39:mRNA-p1-CDS1,TcCLB.506863.4:mRNA-p1-CDS1,TcCLB.506863.10:mRNA-p1-CDS1,TcCLB.506863.20:mRNA-p1-CDS1,TcCLB.506863.30:mRNA-p1-CDS1,TcCLB.506863.40:mRNA-p1-CDS1,TcCLB.506863.50:mRNA-p1-CDS1,TcCL…
TcChr13-S	445361	447361	origins	CDS	ID=TcCLB.506863.80:mRNA-p1-CDS1;Parent=TcCLB.506863.80:mRNA;gene_id=TcCLB.506863.80;protein_source_id=TcCLB.506863.80:mRNA-p1
TcChr13-S	445361	447361	origins	exon	ID=exon_TcCLB.506863.80:mRNA-E1;Parent=TcCLB.506863.80:mRNA;gene_id=TcCLB.506863.80
TcChr13-S	445361	447361	origins	mRNA	ID=TcCLB.506863.80:mRNA;Parent=TcCLB.506863.80;description=ApaH-like
TcChr13-S	445361	447361	origins	protein_coding_gene	ID=TcCLB.506863.80;description=ApaH-like
TcChr13-S	445361	447361	origins	polycistron-CDS	ID=polycistron-CDS_20;contentCount=39;content=TcCLB.508323.190:mRNA-p1-CDS1,TcCLB.508323.199:mRNA-p1-CDS1,TcCLB.506861.10:mRNA-p1-CDS1,TcCLB.506861.20:mRNA-p1-CDS1,TcCLB.506861.30:mRNA-p1-CDS1,TcCLB.506861.39:mRNA-p1-CDS1,TcCLB.506863.4:mRNA-p1-CDS1,TcCLB.506863.10:mRNA-p1-CDS1,TcCLB.506863.20:mRNA-p1-CDS1,TcCLB.506863.30:mRNA-p1-CDS1,TcCLB.506863.40:mRNA-p1-CDS1,TcCLB.506863.50:mRNA-p1-CDS1,TcCL…
TcChr13-S	455473	457473	origins	CDS	ID=TcCLB.510535.20:mRNA-p1-CDS1;Parent=TcCLB.510535.20:mRNA;gene_id=TcCLB.510535.20;protein_source_id=TcCLB.510535.20:mRNA-p1
TcChr13-S	455473	457473	origins	exon	ID=exon_TcCLB.510535.20:mRNA-E1;Parent=TcCLB.510535.20:mRNA;gene_id=TcCLB.510535.20
TcChr13-S	455473	457473	origins	mRNA	ID=TcCLB.510535.20:mRNA;Parent=TcCLB.510535.20;description=hypothetical
TcChr13-S	455473	457473	origins	protein_coding_gene	ID=TcCLB.510535.20;description=hypothetical
TcChr13-S	455473	457473	origins	polycistron-CDS	ID=polycistron-CDS_20;contentCount=39;content=TcCLB.508323.190:mRNA-p1-CDS1,TcCLB.508323.199:mRNA-p1-CDS1,TcCLB.506861.10:mRNA-p1-CDS1,TcCLB.506861.20:mRNA-p1-CDS1,TcCLB.506861.30:mRNA-p1-CDS1,TcCLB.506861.39:mRNA-p1-CDS1,TcCLB.506863.4:mRNA-p1-CDS1,TcCLB.506863.10:mRNA-p1-CDS1,TcCLB.506863.20:mRNA-p1-CDS1,TcCLB.506863.30:mRNA-p1-CDS1,TcCLB.506863.40:mRNA-p1-CDS1,TcCLB.506863.50:mRNA-p1-CDS1,TcCL…
TcChr13-S	460483	462483	origins	CDS	ID=TcCLB.510535.30:mRNA-p1-CDS1;Parent=TcCLB.510535.30:mRNA;gene_id=TcCLB.510535.30;protein_source_id=TcCLB.510535.30:mRNA-p1
TcChr13-S	460483	462483	origins	exon	ID=exon_TcCLB.510535.30:mRNA-E1;Parent=TcCLB.510535.30:mRNA;gene_id=TcCLB.510535.30
TcChr13-S	460483	462483	origins	mRNA	ID=TcCLB.510535.30:mRNA;Parent=TcCLB.510535.30;description=hypothetical
TcChr13-S	460483	462483	origins	protein_coding_gene	ID=TcCLB.510535.30;description=hypothetical
TcChr13-S	460483	462483	origins	CDS	ID=TcCLB.510535.20:mRNA-p1-CDS1;Parent=TcCLB.510535.20:mRNA;gene_id=TcCLB.510535.20;protein_source_id=TcCLB.510535.20:mRNA-p1
TcChr13-S	460483	462483	origins	exon	ID=exon_TcCLB.510535.20:mRNA-E1;Parent=TcCLB.510535.20:mRNA;gene_id=TcCLB.510535.20
TcChr13-S	460483	462483	origins	mRNA	ID=TcCLB.510535.20:mRNA;Parent=TcCLB.510535.20;description=hypothetical
TcChr13-S	460483	462483	origins	protein_coding_gene	ID=TcCLB.510535.20;description=hypothetical
TcChr13-S	460483	462483	origins	polycistron-CDS	ID=polycistron-CDS_20;contentCount=39;content=TcCLB.508323.190:mRNA-p1-CDS1,TcCLB.508323.199:mRNA-p1-CDS1,TcCLB.506861.10:mRNA-p1-CDS1,TcCLB.506861.20:mRNA-p1-CDS1,TcCLB.506861.30:mRNA-p1-CDS1,TcCLB.506861.39:mRNA-p1-CDS1,TcCLB.506863.4:mRNA-p1-CDS1,TcCLB.506863.10:mRNA-p1-CDS1,TcCLB.506863.20:mRNA-p1-CDS1,TcCLB.506863.30:mRNA-p1-CDS1,TcCLB.506863.40:mRNA-p1-CDS1,TcCLB.506863.50:mRNA-p1-CDS1,TcCL…
TcChr13-S	466484	468484	origins	CDS	ID=TcCLB.510535.60:mRNA-p1-CDS1;Parent=TcCLB.510535.60:mRNA;gene_id=TcCLB.510535.60;protein_source_id=TcCLB.510535.60:mRNA-p1
TcChr13-S	466484	468484	origins	exon	ID=exon_TcCLB.510535.60:mRNA-E1;Parent=TcCLB.510535.60:mRNA;gene_id=TcCLB.510535.60
TcChr13-S	466484	468484	origins	mRNA	ID=TcCLB.510535.60:mRNA;Parent=TcCLB.510535.60;description=ccr4-not
TcChr13-S	466484	468484	origins	protein_coding_gene	ID=TcCLB.510535.60;Name=CAF1;description=ccr4-not
TcChr13-S	466484	468484	origins	CDS	ID=TcCLB.510535.64:mRNA-p1-CDS1;Parent=TcCLB.510535.64:mRNA;gene_id=TcCLB.510535.64;protein_source_id=TcCLB.510535.64:mRNA-p1
TcChr13-S	466484	468484	origins	exon	ID=exon_TcCLB.510535.64:mRNA-E1;Parent=TcCLB.510535.64:mRNA;gene_id=TcCLB.510535.64
TcChr13-S	466484	468484	origins	mRNA	ID=TcCLB.510535.64:mRNA;Parent=TcCLB.510535.64;description=hypothetical
TcChr13-S	466484	468484	origins	protein_coding_gene	ID=TcCLB.510535.64;description=hypothetical
TcChr13-S	466484	468484	origins	polycistron-CDS	ID=polycistron-CDS_20;contentCount=39;content=TcCLB.508323.190:mRNA-p1-CDS1,TcCLB.508323.199:mRNA-p1-CDS1,TcCLB.506861.10:mRNA-p1-CDS1,TcCLB.506861.20:mRNA-p1-CDS1,TcCLB.506861.30:mRNA-p1-CDS1,TcCLB.506861.39:mRNA-p1-CDS1,TcCLB.506863.4:mRNA-p1-CDS1,TcCLB.506863.10:mRNA-p1-CDS1,TcCLB.506863.20:mRNA-p1-CDS1,TcCLB.506863.30:mRNA-p1-CDS1,TcCLB.506863.40:mRNA-p1-CDS1,TcCLB.506863.50:mRNA-p1-CDS1,TcCL…
TcChr13-S	473000	475000	origins	CDS	ID=TcCLB.510535.100:mRNA-p1-CDS1;Parent=TcCLB.510535.100:mRNA;gene_id=TcCLB.510535.100;protein_source_id=TcCLB.510535.100:mRNA-p1
TcChr13-S	473000	475000	origins	exon	ID=exon_TcCLB.510535.100:mRNA-E1;Parent=TcCLB.510535.100:mRNA;gene_id=TcCLB.510535.100
TcChr13-S	473000	475000	origins	mRNA	ID=TcCLB.510535.100:mRNA;Parent=TcCLB.510535.100;Note=3.4.22.-
TcChr13-S	473000	475000	origins	protein_coding_gene	ID=TcCLB.510535.100;Name=TCCB;description=cysteine
TcChr13-S	473000	475000	origins	polycistron-CDS	ID=polycistron-CDS_20;contentCount=39;content=TcCLB.508323.190:mRNA-p1-CDS1,TcCLB.508323.199:mRNA-p1-CDS1,TcCLB.506861.10:mRNA-p1-CDS1,TcCLB.506861.20:mRNA-p1-CDS1,TcCLB.506861.30:mRNA-p1-CDS1,TcCLB.506861.39:mRNA-p1-CDS1,TcCLB.506863.4:mRNA-p1-CDS1,TcCLB.506863.10:mRNA-p1-CDS1,TcCLB.506863.20:mRNA-p1-CDS1,TcCLB.506863.30:mRNA-p1-CDS1,TcCLB.506863.40:mRNA-p1-CDS1,TcCLB.506863.50:mRNA-p1-CDS1,TcCL…
TcChr13-S	487977	489977	origins	CDS	ID=TcCLB.508325.30:mRNA-p1-CDS1;Parent=TcCLB.508325.30:mRNA;gene_id=TcCLB.508325.30;protein_source_id=TcCLB.508325.30:mRNA-p1
TcChr13-S	487977	489977	origins	exon	ID=exon_TcCLB.508325.30:mRNA-E1;Parent=TcCLB.508325.30:mRNA;gene_id=TcCLB.508325.30
TcChr13-S	487977	489977	origins	mRNA	ID=TcCLB.508325.30:mRNA;Parent=TcCLB.508325.30;description=dispersed
TcChr13-S	487977	489977	origins	protein_coding_gene	ID=TcCLB.508325.30;description=dispersed
TcChr13-S	487977	489977	origins	polycistron-CDS	ID=polycistron-CDS_20;contentCount=39;content=TcCLB.508323.190:mRNA-p1-CDS1,TcCLB.508323.199:mRNA-p1-CDS1,TcCLB.506861.10:mRNA-p1-CDS1,TcCLB.506861.20:mRNA-p1-CDS1,TcCLB.506861.30:mRNA-p1-CDS1,TcCLB.506861.39:mRNA-p1-CDS1,TcCLB.506863.4:mRNA-p1-CDS1,TcCLB.506863.10:mRNA-p1-CDS1,TcCLB.506863.20:mRNA-p1-CDS1,TcCLB.506863.30:mRNA-p1-CDS1,TcCLB.506863.40:mRNA-p1-CDS1,TcCLB.506863.50:mRNA-p1-CDS1,TcCL…
TcChr13-S	495908	497908	origins	CDS	ID=TcCLB.508325.60:mRNA-p1-CDS1;Parent=TcCLB.508325.60:mRNA;gene_id=TcCLB.508325.60;protein_source_id=TcCLB.508325.60:mRNA-p1
TcChr13-S	495908	497908	origins	exon	ID=exon_TcCLB.508325.60:mRNA-E1;Parent=TcCLB.508325.60:mRNA;gene_id=TcCLB.508325.60
TcChr13-S	495908	497908	origins	mRNA	ID=TcCLB.508325.60:mRNA;Parent=TcCLB.508325.60;description=retrotransposon
TcChr13-S	495908	497908	origins	protein_coding_gene	ID=TcCLB.508325.60;description=retrotransposon
TcChr13-S	495908	497908	origins	polycistron-CDS	ID=polycistron-CDS_20;contentCount=39;content=TcCLB.508323.190:mRNA-p1-CDS1,TcCLB.508323.199:mRNA-p1-CDS1,TcCLB.506861.10:mRNA-p1-CDS1,TcCLB.506861.20:mRNA-p1-CDS1,TcCLB.506861.30:mRNA-p1-CDS1,TcCLB.506861.39:mRNA-p1-CDS1,TcCLB.506863.4:mRNA-p1-CDS1,TcCLB.506863.10:mRNA-p1-CDS1,TcCLB.506863.20:mRNA-p1-CDS1,TcCLB.506863.30:mRNA-p1-CDS1,TcCLB.506863.40:mRNA-p1-CDS1,TcCLB.506863.50:mRNA-p1-CDS1,TcCL…
TcChr13-S	500906	502906	origins	exon	ID=exon_TcCLB.508325.80:pseudogenic_transcript-E1;Parent=TcCLB.508325.80:pseudogenic_transcript;gene_id=TcCLB.508325.80
TcChr13-S	500906	502906	origins	pseudogene	ID=TcCLB.508325.80;description=trans-sialidase
TcChr13-S	500906	502906	origins	pseudogenic_transcript	ID=TcCLB.508325.80:pseudogenic_transcript;Parent=TcCLB.508325.80;description=trans-sialidase
TcChr13-S	500906	502906	origins	polycistron-CDS	ID=polycistron-CDS_20;contentCount=39;content=TcCLB.508323.190:mRNA-p1-CDS1,TcCLB.508323.199:mRNA-p1-CDS1,TcCLB.506861.10:mRNA-p1-CDS1,TcCLB.506861.20:mRNA-p1-CDS1,TcCLB.506861.30:mRNA-p1-CDS1,TcCLB.506861.39:mRNA-p1-CDS1,TcCLB.506863.4:mRNA-p1-CDS1,TcCLB.506863.10:mRNA-p1-CDS1,TcCLB.506863.20:mRNA-p1-CDS1,TcCLB.506863.30:mRNA-p1-CDS1,TcCLB.506863.40:mRNA-p1-CDS1,TcCLB.506863.50:mRNA-p1-CDS1,TcCL…
TcChr13-S	509435	511435	origins	CDS	ID=TcCLB.508325.130:mRNA-p1-CDS1;Parent=TcCLB.508325.130:mRNA;gene_id=TcCLB.508325.130;protein_source_id=TcCLB.508325.130:mRNA-p1
TcChr13-S	509435	511435	origins	exon	ID=exon_TcCLB.508325.130:mRNA-E1;Parent=TcCLB.508325.130:mRNA;gene_id=TcCLB.508325.130
TcChr13-S	509435	511435	origins	mRNA	ID=TcCLB.508325.130:mRNA;Parent=TcCLB.508325.130;description=protein
TcChr13-S	509435	511435	origins	protein_coding_gene	ID=TcCLB.508325.130;description=protein
TcChr13-S	509435	511435	origins	exon	ID=exon_TcCLB.508325.150:pseudogenic_transcript-E1;Parent=TcCLB.508325.150:pseudogenic_transcript;gene_id=TcCLB.508325.150
TcChr13-S	509435	511435	origins	pseudogene	ID=TcCLB.508325.150;description=glycine
TcChr13-S	509435	511435	origins	pseudogenic_transcript	ID=TcCLB.508325.150:pseudogenic_transcript;Parent=TcCLB.508325.150;description=glycine
TcChr13-S	509435	511435	origins	polycistron-CDS	ID=polycistron-CDS_20;contentCount=39;content=TcCLB.508323.190:mRNA-p1-CDS1,TcCLB.508323.199:mRNA-p1-CDS1,TcCLB.506861.10:mRNA-p1-CDS1,TcCLB.506861.20:mRNA-p1-CDS1,TcCLB.506861.30:mRNA-p1-CDS1,TcCLB.506861.39:mRNA-p1-CDS1,TcCLB.506863.4:mRNA-p1-CDS1,TcCLB.506863.10:mRNA-p1-CDS1,TcCLB.506863.20:mRNA-p1-CDS1,TcCLB.506863.30:mRNA-p1-CDS1,TcCLB.506863.40:mRNA-p1-CDS1,TcCLB.506863.50:mRNA-p1-CDS1,TcCL…
TcChr13-S	526895	528895	origins	exon	ID=exon_TcCLB.508325.220:pseudogenic_transcript-E1;Parent=TcCLB.508325.220:pseudogenic_transcript;gene_id=TcCLB.508325.220
TcChr13-S	526895	528895	origins	pseudogene	ID=TcCLB.508325.220;description=beta
TcChr13-S	526895	528895	origins	pseudogenic_transcript	ID=TcCLB.508325.220:pseudogenic_transcript;Parent=TcCLB.508325.220;description=beta
TcChr13-S	526895	528895	origins	polycistron-CDS	ID=polycistron-CDS_20;contentCount=39;content=TcCLB.508323.190:mRNA-p1-CDS1,TcCLB.508323.199:mRNA-p1-CDS1,TcCLB.506861.10:mRNA-p1-CDS1,TcCLB.506861.20:mRNA-p1-CDS1,TcCLB.506861.30:mRNA-p1-CDS1,TcCLB.506861.39:mRNA-p1-CDS1,TcCLB.506863.4:mRNA-p1-CDS1,TcCLB.506863.10:mRNA-p1-CDS1,TcCLB.506863.20:mRNA-p1-CDS1,TcCLB.506863.30:mRNA-p1-CDS1,TcCLB.506863.40:mRNA-p1-CDS1,TcCLB.506863.50:mRNA-p1-CDS1,TcCL…
TcChr13-S	535884	537884	origins	CDS	ID=TcCLB.508325.230:mRNA-p1-CDS1;Parent=TcCLB.508325.230:mRNA;gene_id=TcCLB.508325.230;protein_source_id=TcCLB.508325.230:mRNA-p1
TcChr13-S	535884	537884	origins	exon	ID=exon_TcCLB.508325.230:mRNA-E1;Parent=TcCLB.508325.230:mRNA;gene_id=TcCLB.508325.230
TcChr13-S	535884	537884	origins	mRNA	ID=TcCLB.508325.230:mRNA;Parent=TcCLB.508325.230;description=trans-sialidase%2C
TcChr13-S	535884	537884	origins	protein_coding_gene	ID=TcCLB.508325.230;description=trans-sialidase%2C
TcChr13-S	535884	537884	origins	polycistron-CDS	ID=polycistron-CDS_20;contentCount=39;content=TcCLB.508323.190:mRNA-p1-CDS1,TcCLB.508323.199:mRNA-p1-CDS1,TcCLB.506861.10:mRNA-p1-CDS1,TcCLB.506861.20:mRNA-p1-CDS1,TcCLB.506861.30:mRNA-p1-CDS1,TcCLB.506861.39:mRNA-p1-CDS1,TcCLB.506863.4:mRNA-p1-CDS1,TcCLB.506863.10:mRNA-p1-CDS1,TcCLB.506863.20:mRNA-p1-CDS1,TcCLB.506863.30:mRNA-p1-CDS1,TcCLB.506863.40:mRNA-p1-CDS1,TcCLB.506863.50:mRNA-p1-CDS1,TcCL…
TcChr13-S	543773	545773	origins	exon	ID=exon_TcCLB.508325.270:pseudogenic_transcript-E1;Parent=TcCLB.508325.270:pseudogenic_transcript;gene_id=TcCLB.508325.270
TcChr13-S	543773	545773	origins	pseudogene	ID=TcCLB.508325.270;description=retrotransposon
TcChr13-S	543773	545773	origins	pseudogenic_transcript	ID=TcCLB.508325.270:pseudogenic_transcript;Parent=TcCLB.508325.270;description=retrotransposon
TcChr13-S	543773	545773	origins	exon	ID=exon_TcCLB.508325.290:pseudogenic_transcript-E1;Parent=TcCLB.508325.290:pseudogenic_transcript;gene_id=TcCLB.508325.290
TcChr13-S	543773	545773	origins	pseudogene	ID=TcCLB.508325.290;description=trans-sialidase
TcChr13-S	543773	545773	origins	pseudogenic_transcript	ID=TcCLB.508325.290:pseudogenic_transcript;Parent=TcCLB.508325.290;description=trans-sialidase
TcChr13-S	543773	545773	origins	polycistron-CDS	ID=polycistron-CDS_20;contentCount=39;content=TcCLB.508323.190:mRNA-p1-CDS1,TcCLB.508323.199:mRNA-p1-CDS1,TcCLB.506861.10:mRNA-p1-CDS1,TcCLB.506861.20:mRNA-p1-CDS1,TcCLB.506861.30:mRNA-p1-CDS1,TcCLB.506861.39:mRNA-p1-CDS1,TcCLB.506863.4:mRNA-p1-CDS1,TcCLB.506863.10:mRNA-p1-CDS1,TcCLB.506863.20:mRNA-p1-CDS1,TcCLB.506863.30:mRNA-p1-CDS1,TcCLB.506863.40:mRNA-p1-CDS1,TcCLB.506863.50:mRNA-p1-CDS1,TcCL…
TcChr14-S	67796	69796	origins	CDS	ID=TcCLB.506181.104:mRNA-p1-CDS1;Parent=TcCLB.506181.104:mRNA;gene_id=TcCLB.506181.104;protein_source_id=TcCLB.506181.104:mRNA-p1
TcChr14-S	67796	69796	origins	exon	ID=exon_TcCLB.506181.104:mRNA-E1;Parent=TcCLB.506181.104:mRNA;gene_id=TcCLB.506181.104
TcChr14-S	67796	69796	origins	mRNA	ID=TcCLB.506181.104:mRNA;Parent=TcCLB.506181.104;description=actyltransferase-like
TcChr14-S	67796	69796	origins	protein_coding_gene	ID=TcCLB.506181.104;description=actyltransferase-like
TcChr14-S	67796	69796	origins	CDS	ID=TcCLB.506181.97:mRNA-p1-CDS1;Parent=TcCLB.506181.97:mRNA;gene_id=TcCLB.506181.97;protein_source_id=TcCLB.506181.97:mRNA-p1
TcChr14-S	67796	69796	origins	exon	ID=exon_TcCLB.506181.97:mRNA-E1;Parent=TcCLB.506181.97:mRNA;gene_id=TcCLB.506181.97
TcChr14-S	67796	69796	origins	mRNA	ID=TcCLB.506181.97:mRNA;Parent=TcCLB.506181.97;description=Protein
TcChr14-S	67796	69796	origins	protein_coding_gene	ID=TcCLB.506181.97;description=Protein
TcChr14-S	67796	69796	origins	CDS	ID=TcCLB.506181.90:mRNA-p1-CDS1;Parent=TcCLB.506181.90:mRNA;gene_id=TcCLB.506181.90;protein_source_id=TcCLB.506181.90:mRNA-p1
TcChr14-S	67796	69796	origins	exon	ID=exon_TcCLB.506181.90:mRNA-E1;Parent=TcCLB.506181.90:mRNA;gene_id=TcCLB.506181.90
TcChr14-S	67796	69796	origins	mRNA	ID=TcCLB.506181.90:mRNA;Parent=TcCLB.506181.90;description=F-actin
TcChr14-S	67796	69796	origins	protein_coding_gene	ID=TcCLB.506181.90;description=F-actin
TcChr14-S	67796	69796	origins	polycistron-CDS	ID=polycistron-CDS_21;contentCount=36;content=TcCLB.457109.9:mRNA-p1-CDS1,TcCLB.510815.9:mRNA-p1-CDS1,TcCLB.420091.10:mRNA-p1-CDS1,TcCLB.504127.20:mRNA-p1-CDS1,TcCLB.506239.10:mRNA-p1-CDS1,TcCLB.506239.20:mRNA-p1-CDS1,TcCLB.506239.30:mRNA-p1-CDS1,TcCLB.506239.40:mRNA-p1-CDS1,TcCLB.506239.50:mRNA-p1-CDS1,TcCLB.506239.60:mRNA-p1-CDS1,TcCLB.506181.150:mRNA-p1-CDS1,TcCLB.506181.140:mRNA-p1-CDS1,TcCLB…
TcChr14-S	74661	76661	origins	CDS	ID=TcCLB.506181.70:mRNA-p1-CDS1;Parent=TcCLB.506181.70:mRNA;gene_id=TcCLB.506181.70;protein_source_id=TcCLB.506181.70:mRNA-p1
TcChr14-S	74661	76661	origins	exon	ID=exon_TcCLB.506181.70:mRNA-E1;Parent=TcCLB.506181.70:mRNA;gene_id=TcCLB.506181.70
TcChr14-S	74661	76661	origins	mRNA	ID=TcCLB.506181.70:mRNA;Parent=TcCLB.506181.70;description=hypothetical
TcChr14-S	74661	76661	origins	protein_coding_gene	ID=TcCLB.506181.70;description=hypothetical
TcChr14-S	74661	76661	origins	polycistron-CDS	ID=polycistron-CDS_21;contentCount=36;content=TcCLB.457109.9:mRNA-p1-CDS1,TcCLB.510815.9:mRNA-p1-CDS1,TcCLB.420091.10:mRNA-p1-CDS1,TcCLB.504127.20:mRNA-p1-CDS1,TcCLB.506239.10:mRNA-p1-CDS1,TcCLB.506239.20:mRNA-p1-CDS1,TcCLB.506239.30:mRNA-p1-CDS1,TcCLB.506239.40:mRNA-p1-CDS1,TcCLB.506239.50:mRNA-p1-CDS1,TcCLB.506239.60:mRNA-p1-CDS1,TcCLB.506181.150:mRNA-p1-CDS1,TcCLB.506181.140:mRNA-p1-CDS1,TcCLB…
TcChr14-S	88223	90223	origins	CDS	ID=TcCLB.506181.10:mRNA-p1-CDS1;Parent=TcCLB.506181.10:mRNA;gene_id=TcCLB.506181.10;protein_source_id=TcCLB.506181.10:mRNA-p1
TcChr14-S	88223	90223	origins	exon	ID=exon_TcCLB.506181.10:mRNA-E1;Parent=TcCLB.506181.10:mRNA;gene_id=TcCLB.506181.10
TcChr14-S	88223	90223	origins	mRNA	ID=TcCLB.506181.10:mRNA;Parent=TcCLB.506181.10;description=hypothetical
TcChr14-S	88223	90223	origins	protein_coding_gene	ID=TcCLB.506181.10;description=hypothetical
TcChr14-S	88223	90223	origins	CDS	ID=TcCLB.509625.30:mRNA-p1-CDS1;Parent=TcCLB.509625.30:mRNA;gene_id=TcCLB.509625.30;protein_source_id=TcCLB.509625.30:mRNA-p1
TcChr14-S	88223	90223	origins	exon	ID=exon_TcCLB.509625.30:mRNA-E1;Parent=TcCLB.509625.30:mRNA;gene_id=TcCLB.509625.30
TcChr14-S	88223	90223	origins	mRNA	ID=TcCLB.509625.30:mRNA;Parent=TcCLB.509625.30;description=Protein
TcChr14-S	88223	90223	origins	protein_coding_gene	ID=TcCLB.509625.30;description=Protein
TcChr14-S	88223	90223	origins	polycistron-CDS	ID=polycistron-CDS_21;contentCount=36;content=TcCLB.457109.9:mRNA-p1-CDS1,TcCLB.510815.9:mRNA-p1-CDS1,TcCLB.420091.10:mRNA-p1-CDS1,TcCLB.504127.20:mRNA-p1-CDS1,TcCLB.506239.10:mRNA-p1-CDS1,TcCLB.506239.20:mRNA-p1-CDS1,TcCLB.506239.30:mRNA-p1-CDS1,TcCLB.506239.40:mRNA-p1-CDS1,TcCLB.506239.50:mRNA-p1-CDS1,TcCLB.506239.60:mRNA-p1-CDS1,TcCLB.506181.150:mRNA-p1-CDS1,TcCLB.506181.140:mRNA-p1-CDS1,TcCLB…
TcChr14-S	124909	126909	origins	CDS	ID=TcCLB.504089.70:mRNA-p1-CDS1;Parent=TcCLB.504089.70:mRNA;gene_id=TcCLB.504089.70;protein_source_id=TcCLB.504089.70:mRNA-p1
TcChr14-S	124909	126909	origins	exon	ID=exon_TcCLB.504089.70:mRNA-E1;Parent=TcCLB.504089.70:mRNA;gene_id=TcCLB.504089.70
TcChr14-S	124909	126909	origins	mRNA	ID=TcCLB.504089.70:mRNA;Parent=TcCLB.504089.70;description=hypothetical
TcChr14-S	124909	126909	origins	protein_coding_gene	ID=TcCLB.504089.70;description=hypothetical
TcChr14-S	124909	126909	origins	dSSR	ID=dSSR_10;adjacentPol=polycistron-CDS_21,polycistron-CDS_22
TcChr14-S	124909	126909	origins	polycistron-CDS	ID=polycistron-CDS_22;contentCount=42;content=TcCLB.504089.70:mRNA-p1-CDS1,TcCLB.504089.60:mRNA-p1-CDS1,TcCLB.504089.54:mRNA-p1-CDS1,TcCLB.504089.50:mRNA-p1-CDS1,TcCLB.504089.40:mRNA-p1-CDS1,TcCLB.504089.30:mRNA-p1-CDS1,TcCLB.504089.14:mRNA-p1-CDS1,TcCLB.506227.250:mRNA-p1-CDS1,TcCLB.506227.240:mRNA-p1-CDS1,TcCLB.506227.230:mRNA-p1-CDS1,TcCLB.506227.220:mRNA-p1-CDS1,TcCLB.506227.210:mRNA-p1-CDS1,…
TcChr14-S	135918	137918	origins	CDS	ID=TcCLB.504089.30:mRNA-p1-CDS1;Parent=TcCLB.504089.30:mRNA;gene_id=TcCLB.504089.30;protein_source_id=TcCLB.504089.30:mRNA-p1
TcChr14-S	135918	137918	origins	exon	ID=exon_TcCLB.504089.30:mRNA-E1;Parent=TcCLB.504089.30:mRNA;gene_id=TcCLB.504089.30
TcChr14-S	135918	137918	origins	mRNA	ID=TcCLB.504089.30:mRNA;Parent=TcCLB.504089.30;description=hypothetical
TcChr14-S	135918	137918	origins	protein_coding_gene	ID=TcCLB.504089.30;description=hypothetical
TcChr14-S	135918	137918	origins	polycistron-CDS	ID=polycistron-CDS_22;contentCount=42;content=TcCLB.504089.70:mRNA-p1-CDS1,TcCLB.504089.60:mRNA-p1-CDS1,TcCLB.504089.54:mRNA-p1-CDS1,TcCLB.504089.50:mRNA-p1-CDS1,TcCLB.504089.40:mRNA-p1-CDS1,TcCLB.504089.30:mRNA-p1-CDS1,TcCLB.504089.14:mRNA-p1-CDS1,TcCLB.506227.250:mRNA-p1-CDS1,TcCLB.506227.240:mRNA-p1-CDS1,TcCLB.506227.230:mRNA-p1-CDS1,TcCLB.506227.220:mRNA-p1-CDS1,TcCLB.506227.210:mRNA-p1-CDS1,…
TcChr14-S	146714	148714	origins	CDS	ID=TcCLB.506227.240:mRNA-p1-CDS1;Parent=TcCLB.506227.240:mRNA;gene_id=TcCLB.506227.240;protein_source_id=TcCLB.506227.240:mRNA-p1
TcChr14-S	146714	148714	origins	exon	ID=exon_TcCLB.506227.240:mRNA-E1;Parent=TcCLB.506227.240:mRNA;gene_id=TcCLB.506227.240
TcChr14-S	146714	148714	origins	mRNA	ID=TcCLB.506227.240:mRNA;Parent=TcCLB.506227.240;description=hypothetical
TcChr14-S	146714	148714	origins	protein_coding_gene	ID=TcCLB.506227.240;description=hypothetical
TcChr14-S	146714	148714	origins	polycistron-CDS	ID=polycistron-CDS_22;contentCount=42;content=TcCLB.504089.70:mRNA-p1-CDS1,TcCLB.504089.60:mRNA-p1-CDS1,TcCLB.504089.54:mRNA-p1-CDS1,TcCLB.504089.50:mRNA-p1-CDS1,TcCLB.504089.40:mRNA-p1-CDS1,TcCLB.504089.30:mRNA-p1-CDS1,TcCLB.504089.14:mRNA-p1-CDS1,TcCLB.506227.250:mRNA-p1-CDS1,TcCLB.506227.240:mRNA-p1-CDS1,TcCLB.506227.230:mRNA-p1-CDS1,TcCLB.506227.220:mRNA-p1-CDS1,TcCLB.506227.210:mRNA-p1-CDS1,…
TcChr14-S	151292	153292	origins	CDS	ID=TcCLB.506227.220:mRNA-p1-CDS1;Parent=TcCLB.506227.220:mRNA;gene_id=TcCLB.506227.220;protein_source_id=TcCLB.506227.220:mRNA-p1
TcChr14-S	151292	153292	origins	exon	ID=exon_TcCLB.506227.220:mRNA-E1;Parent=TcCLB.506227.220:mRNA;gene_id=TcCLB.506227.220
TcChr14-S	151292	153292	origins	mRNA	ID=TcCLB.506227.220:mRNA;Parent=TcCLB.506227.220;description=Nucleoporin
TcChr14-S	151292	153292	origins	protein_coding_gene	ID=TcCLB.506227.220;Name=NUP48;description=Nucleoporin
TcChr14-S	151292	153292	origins	CDS	ID=TcCLB.506227.210:mRNA-p1-CDS1;Parent=TcCLB.506227.210:mRNA;gene_id=TcCLB.506227.210;protein_source_id=TcCLB.506227.210:mRNA-p1
TcChr14-S	151292	153292	origins	exon	ID=exon_TcCLB.506227.210:mRNA-E1;Parent=TcCLB.506227.210:mRNA;gene_id=TcCLB.506227.210
TcChr14-S	151292	153292	origins	mRNA	ID=TcCLB.506227.210:mRNA;Parent=TcCLB.506227.210;description=Domain
TcChr14-S	151292	153292	origins	protein_coding_gene	ID=TcCLB.506227.210;description=Domain
TcChr14-S	151292	153292	origins	polycistron-CDS	ID=polycistron-CDS_22;contentCount=42;content=TcCLB.504089.70:mRNA-p1-CDS1,TcCLB.504089.60:mRNA-p1-CDS1,TcCLB.504089.54:mRNA-p1-CDS1,TcCLB.504089.50:mRNA-p1-CDS1,TcCLB.504089.40:mRNA-p1-CDS1,TcCLB.504089.30:mRNA-p1-CDS1,TcCLB.504089.14:mRNA-p1-CDS1,TcCLB.506227.250:mRNA-p1-CDS1,TcCLB.506227.240:mRNA-p1-CDS1,TcCLB.506227.230:mRNA-p1-CDS1,TcCLB.506227.220:mRNA-p1-CDS1,TcCLB.506227.210:mRNA-p1-CDS1,…
TcChr14-S	157735	159735	origins	CDS	ID=TcCLB.506227.190:mRNA-p1-CDS1;Parent=TcCLB.506227.190:mRNA;gene_id=TcCLB.506227.190;protein_source_id=TcCLB.506227.190:mRNA-p1
TcChr14-S	157735	159735	origins	exon	ID=exon_TcCLB.506227.190:mRNA-E1;Parent=TcCLB.506227.190:mRNA;gene_id=TcCLB.506227.190
TcChr14-S	157735	159735	origins	mRNA	ID=TcCLB.506227.190:mRNA;Parent=TcCLB.506227.190;description=hypothetical
TcChr14-S	157735	159735	origins	protein_coding_gene	ID=TcCLB.506227.190;description=hypothetical
TcChr14-S	157735	159735	origins	CDS	ID=TcCLB.506227.180:mRNA-p1-CDS1;Parent=TcCLB.506227.180:mRNA;gene_id=TcCLB.506227.180;protein_source_id=TcCLB.506227.180:mRNA-p1
TcChr14-S	157735	159735	origins	exon	ID=exon_TcCLB.506227.180:mRNA-E1;Parent=TcCLB.506227.180:mRNA;gene_id=TcCLB.506227.180
TcChr14-S	157735	159735	origins	mRNA	ID=TcCLB.506227.180:mRNA;Parent=TcCLB.506227.180;description=ras-related
TcChr14-S	157735	159735	origins	protein_coding_gene	ID=TcCLB.506227.180;Name=RAB5B;description=ras-related
TcChr14-S	157735	159735	origins	CDS	ID=TcCLB.506227.170:mRNA-p1-CDS1;Parent=TcCLB.506227.170:mRNA;gene_id=TcCLB.506227.170;protein_source_id=TcCLB.506227.170:mRNA-p1
TcChr14-S	157735	159735	origins	exon	ID=exon_TcCLB.506227.170:mRNA-E1;Parent=TcCLB.506227.170:mRNA;gene_id=TcCLB.506227.170
TcChr14-S	157735	159735	origins	mRNA	ID=TcCLB.506227.170:mRNA;Parent=TcCLB.506227.170;description=hypothetical
TcChr14-S	157735	159735	origins	protein_coding_gene	ID=TcCLB.506227.170;description=hypothetical
TcChr14-S	157735	159735	origins	polycistron-CDS	ID=polycistron-CDS_22;contentCount=42;content=TcCLB.504089.70:mRNA-p1-CDS1,TcCLB.504089.60:mRNA-p1-CDS1,TcCLB.504089.54:mRNA-p1-CDS1,TcCLB.504089.50:mRNA-p1-CDS1,TcCLB.504089.40:mRNA-p1-CDS1,TcCLB.504089.30:mRNA-p1-CDS1,TcCLB.504089.14:mRNA-p1-CDS1,TcCLB.506227.250:mRNA-p1-CDS1,TcCLB.506227.240:mRNA-p1-CDS1,TcCLB.506227.230:mRNA-p1-CDS1,TcCLB.506227.220:mRNA-p1-CDS1,TcCLB.506227.210:mRNA-p1-CDS1,…
TcChr14-S	164258	166258	origins	polycistron-CDS	ID=polycistron-CDS_22;contentCount=42;content=TcCLB.504089.70:mRNA-p1-CDS1,TcCLB.504089.60:mRNA-p1-CDS1,TcCLB.504089.54:mRNA-p1-CDS1,TcCLB.504089.50:mRNA-p1-CDS1,TcCLB.504089.40:mRNA-p1-CDS1,TcCLB.504089.30:mRNA-p1-CDS1,TcCLB.504089.14:mRNA-p1-CDS1,TcCLB.506227.250:mRNA-p1-CDS1,TcCLB.506227.240:mRNA-p1-CDS1,TcCLB.506227.230:mRNA-p1-CDS1,TcCLB.506227.220:mRNA-p1-CDS1,TcCLB.506227.210:mRNA-p1-CDS1,…
TcChr14-S	173354	175354	origins	CDS	ID=TcCLB.506227.120:mRNA-p1-CDS1;Parent=TcCLB.506227.120:mRNA;gene_id=TcCLB.506227.120;protein_source_id=TcCLB.506227.120:mRNA-p1
TcChr14-S	173354	175354	origins	exon	ID=exon_TcCLB.506227.120:mRNA-E1;Parent=TcCLB.506227.120:mRNA;gene_id=TcCLB.506227.120
TcChr14-S	173354	175354	origins	mRNA	ID=TcCLB.506227.120:mRNA;Parent=TcCLB.506227.120;description=hypothetical
TcChr14-S	173354	175354	origins	protein_coding_gene	ID=TcCLB.506227.120;description=hypothetical
TcChr14-S	173354	175354	origins	CDS	ID=TcCLB.506227.110:mRNA-p1-CDS1;Parent=TcCLB.506227.110:mRNA;gene_id=TcCLB.506227.110;protein_source_id=TcCLB.506227.110:mRNA-p1
TcChr14-S	173354	175354	origins	exon	ID=exon_TcCLB.506227.110:mRNA-E1;Parent=TcCLB.506227.110:mRNA;gene_id=TcCLB.506227.110
TcChr14-S	173354	175354	origins	mRNA	ID=TcCLB.506227.110:mRNA;Parent=TcCLB.506227.110;description=Mitochondrial
TcChr14-S	173354	175354	origins	protein_coding_gene	ID=TcCLB.506227.110;Name=mL52;description=Mitochondrial
TcChr14-S	173354	175354	origins	polycistron-CDS	ID=polycistron-CDS_22;contentCount=42;content=TcCLB.504089.70:mRNA-p1-CDS1,TcCLB.504089.60:mRNA-p1-CDS1,TcCLB.504089.54:mRNA-p1-CDS1,TcCLB.504089.50:mRNA-p1-CDS1,TcCLB.504089.40:mRNA-p1-CDS1,TcCLB.504089.30:mRNA-p1-CDS1,TcCLB.504089.14:mRNA-p1-CDS1,TcCLB.506227.250:mRNA-p1-CDS1,TcCLB.506227.240:mRNA-p1-CDS1,TcCLB.506227.230:mRNA-p1-CDS1,TcCLB.506227.220:mRNA-p1-CDS1,TcCLB.506227.210:mRNA-p1-CDS1,…
TcChr14-S	183545	185545	origins	CDS	ID=TcCLB.506227.50:mRNA-p1-CDS1;Parent=TcCLB.506227.50:mRNA;gene_id=TcCLB.506227.50;protein_source_id=TcCLB.506227.50:mRNA-p1
TcChr14-S	183545	185545	origins	exon	ID=exon_TcCLB.506227.50:mRNA-E1;Parent=TcCLB.506227.50:mRNA;gene_id=TcCLB.506227.50
TcChr14-S	183545	185545	origins	mRNA	ID=TcCLB.506227.50:mRNA;Parent=TcCLB.506227.50;description=hypothetical
TcChr14-S	183545	185545	origins	protein_coding_gene	ID=TcCLB.506227.50;description=hypothetical
TcChr14-S	183545	185545	origins	polycistron-CDS	ID=polycistron-CDS_22;contentCount=42;content=TcCLB.504089.70:mRNA-p1-CDS1,TcCLB.504089.60:mRNA-p1-CDS1,TcCLB.504089.54:mRNA-p1-CDS1,TcCLB.504089.50:mRNA-p1-CDS1,TcCLB.504089.40:mRNA-p1-CDS1,TcCLB.504089.30:mRNA-p1-CDS1,TcCLB.504089.14:mRNA-p1-CDS1,TcCLB.506227.250:mRNA-p1-CDS1,TcCLB.506227.240:mRNA-p1-CDS1,TcCLB.506227.230:mRNA-p1-CDS1,TcCLB.506227.220:mRNA-p1-CDS1,TcCLB.506227.210:mRNA-p1-CDS1,…
TcChr14-S	253495	255495	origins	CDS	ID=TcCLB.506737.40:mRNA-p1-CDS1;Parent=TcCLB.506737.40:mRNA;gene_id=TcCLB.506737.40;protein_source_id=TcCLB.506737.40:mRNA-p1
TcChr14-S	253495	255495	origins	exon	ID=exon_TcCLB.506737.40:mRNA-E1;Parent=TcCLB.506737.40:mRNA;gene_id=TcCLB.506737.40
TcChr14-S	253495	255495	origins	mRNA	ID=TcCLB.506737.40:mRNA;Parent=TcCLB.506737.40;description=hypothetical
TcChr14-S	253495	255495	origins	protein_coding_gene	ID=TcCLB.506737.40;description=hypothetical
TcChr14-S	253495	255495	origins	polycistron-CDS	ID=polycistron-CDS_23;contentCount=105;content=TcCLB.506737.70:mRNA-p1-CDS1,TcCLB.506737.60:mRNA-p1-CDS1,TcCLB.506737.50:mRNA-p1-CDS1,TcCLB.506737.40:mRNA-p1-CDS1,TcCLB.506737.30:mRNA-p1-CDS1,TcCLB.506737.20:mRNA-p1-CDS1,TcCLB.506737.10:mRNA-p1-CDS1,TcCLB.506735.80:mRNA-p1-CDS1,TcCLB.506735.70:mRNA-p1-CDS1,TcCLB.506735.60:mRNA-p1-CDS1,TcCLB.506735.50:mRNA-p1-CDS1,TcCLB.506735.40:mRNA-p1-CDS1,TcCL…
TcChr14-S	262718	264718	origins	CDS	ID=TcCLB.506735.80:mRNA-p1-CDS1;Parent=TcCLB.506735.80:mRNA;gene_id=TcCLB.506735.80;protein_source_id=TcCLB.506735.80:mRNA-p1
TcChr14-S	262718	264718	origins	exon	ID=exon_TcCLB.506735.80:mRNA-E1;Parent=TcCLB.506735.80:mRNA;gene_id=TcCLB.506735.80
TcChr14-S	262718	264718	origins	mRNA	ID=TcCLB.506735.80:mRNA;Parent=TcCLB.506735.80;description=hypothetical
TcChr14-S	262718	264718	origins	protein_coding_gene	ID=TcCLB.506735.80;description=hypothetical
TcChr14-S	262718	264718	origins	polycistron-CDS	ID=polycistron-CDS_23;contentCount=105;content=TcCLB.506737.70:mRNA-p1-CDS1,TcCLB.506737.60:mRNA-p1-CDS1,TcCLB.506737.50:mRNA-p1-CDS1,TcCLB.506737.40:mRNA-p1-CDS1,TcCLB.506737.30:mRNA-p1-CDS1,TcCLB.506737.20:mRNA-p1-CDS1,TcCLB.506737.10:mRNA-p1-CDS1,TcCLB.506735.80:mRNA-p1-CDS1,TcCLB.506735.70:mRNA-p1-CDS1,TcCLB.506735.60:mRNA-p1-CDS1,TcCLB.506735.50:mRNA-p1-CDS1,TcCLB.506735.40:mRNA-p1-CDS1,TcCL…
TcChr14-S	262718	264718	origins	CDS	ID=TcCLB.506737.10:mRNA-p1-CDS1;Parent=TcCLB.506737.10:mRNA;gene_id=TcCLB.506737.10;protein_source_id=TcCLB.506737.10:mRNA-p1
TcChr14-S	262718	264718	origins	exon	ID=exon_TcCLB.506737.10:mRNA-E1;Parent=TcCLB.506737.10:mRNA;gene_id=TcCLB.506737.10
TcChr14-S	262718	264718	origins	mRNA	ID=TcCLB.506737.10:mRNA;Parent=TcCLB.506737.10;description=hypothetical
TcChr14-S	262718	264718	origins	protein_coding_gene	ID=TcCLB.506737.10;description=hypothetical
TcChr14-S	274909	276909	origins	CDS	ID=TcCLB.506735.50:mRNA-p1-CDS1;Parent=TcCLB.506735.50:mRNA;gene_id=TcCLB.506735.50;protein_source_id=TcCLB.506735.50:mRNA-p1
TcChr14-S	274909	276909	origins	exon	ID=exon_TcCLB.506735.50:mRNA-E1;Parent=TcCLB.506735.50:mRNA;gene_id=TcCLB.506735.50
TcChr14-S	274909	276909	origins	mRNA	ID=TcCLB.506735.50:mRNA;Parent=TcCLB.506735.50;description=hypothetical
TcChr14-S	274909	276909	origins	protein_coding_gene	ID=TcCLB.506735.50;description=hypothetical
TcChr14-S	274909	276909	origins	polycistron-CDS	ID=polycistron-CDS_23;contentCount=105;content=TcCLB.506737.70:mRNA-p1-CDS1,TcCLB.506737.60:mRNA-p1-CDS1,TcCLB.506737.50:mRNA-p1-CDS1,TcCLB.506737.40:mRNA-p1-CDS1,TcCLB.506737.30:mRNA-p1-CDS1,TcCLB.506737.20:mRNA-p1-CDS1,TcCLB.506737.10:mRNA-p1-CDS1,TcCLB.506735.80:mRNA-p1-CDS1,TcCLB.506735.70:mRNA-p1-CDS1,TcCLB.506735.60:mRNA-p1-CDS1,TcCLB.506735.50:mRNA-p1-CDS1,TcCLB.506735.40:mRNA-p1-CDS1,TcCL…
TcChr14-S	282652	284652	origins	CDS	ID=TcCLB.506735.30:mRNA-p1-CDS1;Parent=TcCLB.506735.30:mRNA;gene_id=TcCLB.506735.30;protein_source_id=TcCLB.506735.30:mRNA-p1
TcChr14-S	282652	284652	origins	exon	ID=exon_TcCLB.506735.30:mRNA-E1;Parent=TcCLB.506735.30:mRNA;gene_id=TcCLB.506735.30
TcChr14-S	282652	284652	origins	mRNA	ID=TcCLB.506735.30:mRNA;Parent=TcCLB.506735.30;description=hypothetical
TcChr14-S	282652	284652	origins	protein_coding_gene	ID=TcCLB.506735.30;description=hypothetical
TcChr14-S	282652	284652	origins	CDS	ID=TcCLB.506735.20:mRNA-p1-CDS1;Parent=TcCLB.506735.20:mRNA;gene_id=TcCLB.506735.20;protein_source_id=TcCLB.506735.20:mRNA-p1
TcChr14-S	282652	284652	origins	exon	ID=exon_TcCLB.506735.20:mRNA-E1;Parent=TcCLB.506735.20:mRNA;gene_id=TcCLB.506735.20
TcChr14-S	282652	284652	origins	mRNA	ID=TcCLB.506735.20:mRNA;Parent=TcCLB.506735.20;description=hypothetical
TcChr14-S	282652	284652	origins	protein_coding_gene	ID=TcCLB.506735.20;description=hypothetical
TcChr14-S	282652	284652	origins	polycistron-CDS	ID=polycistron-CDS_23;contentCount=105;content=TcCLB.506737.70:mRNA-p1-CDS1,TcCLB.506737.60:mRNA-p1-CDS1,TcCLB.506737.50:mRNA-p1-CDS1,TcCLB.506737.40:mRNA-p1-CDS1,TcCLB.506737.30:mRNA-p1-CDS1,TcCLB.506737.20:mRNA-p1-CDS1,TcCLB.506737.10:mRNA-p1-CDS1,TcCLB.506735.80:mRNA-p1-CDS1,TcCLB.506735.70:mRNA-p1-CDS1,TcCLB.506735.60:mRNA-p1-CDS1,TcCLB.506735.50:mRNA-p1-CDS1,TcCLB.506735.40:mRNA-p1-CDS1,TcCL…
TcChr14-S	287718	289718	origins	polycistron-CDS	ID=polycistron-CDS_23;contentCount=105;content=TcCLB.506737.70:mRNA-p1-CDS1,TcCLB.506737.60:mRNA-p1-CDS1,TcCLB.506737.50:mRNA-p1-CDS1,TcCLB.506737.40:mRNA-p1-CDS1,TcCLB.506737.30:mRNA-p1-CDS1,TcCLB.506737.20:mRNA-p1-CDS1,TcCLB.506737.10:mRNA-p1-CDS1,TcCLB.506735.80:mRNA-p1-CDS1,TcCLB.506735.70:mRNA-p1-CDS1,TcCLB.506735.60:mRNA-p1-CDS1,TcCLB.506735.50:mRNA-p1-CDS1,TcCLB.506735.40:mRNA-p1-CDS1,TcCL…
TcChr14-S	291207	293207	origins	CDS	ID=TcCLB.506733.140:mRNA-p1-CDS1;Parent=TcCLB.506733.140:mRNA;gene_id=TcCLB.506733.140;protein_source_id=TcCLB.506733.140:mRNA-p1
TcChr14-S	291207	293207	origins	exon	ID=exon_TcCLB.506733.140:mRNA-E1;Parent=TcCLB.506733.140:mRNA;gene_id=TcCLB.506733.140
TcChr14-S	291207	293207	origins	mRNA	ID=TcCLB.506733.140:mRNA;Parent=TcCLB.506733.140;description=hypothetical
TcChr14-S	291207	293207	origins	protein_coding_gene	ID=TcCLB.506733.140;description=hypothetical
TcChr14-S	291207	293207	origins	CDS	ID=TcCLB.506733.130:mRNA-p1-CDS1;Parent=TcCLB.506733.130:mRNA;gene_id=TcCLB.506733.130;protein_source_id=TcCLB.506733.130:mRNA-p1
TcChr14-S	291207	293207	origins	exon	ID=exon_TcCLB.506733.130:mRNA-E1;Parent=TcCLB.506733.130:mRNA;gene_id=TcCLB.506733.130
TcChr14-S	291207	293207	origins	mRNA	ID=TcCLB.506733.130:mRNA;Parent=TcCLB.506733.130;description=btb/poz
TcChr14-S	291207	293207	origins	protein_coding_gene	ID=TcCLB.506733.130;description=btb/poz
TcChr14-S	291207	293207	origins	polycistron-CDS	ID=polycistron-CDS_23;contentCount=105;content=TcCLB.506737.70:mRNA-p1-CDS1,TcCLB.506737.60:mRNA-p1-CDS1,TcCLB.506737.50:mRNA-p1-CDS1,TcCLB.506737.40:mRNA-p1-CDS1,TcCLB.506737.30:mRNA-p1-CDS1,TcCLB.506737.20:mRNA-p1-CDS1,TcCLB.506737.10:mRNA-p1-CDS1,TcCLB.506735.80:mRNA-p1-CDS1,TcCLB.506735.70:mRNA-p1-CDS1,TcCLB.506735.60:mRNA-p1-CDS1,TcCLB.506735.50:mRNA-p1-CDS1,TcCLB.506735.40:mRNA-p1-CDS1,TcCL…
TcChr14-S	297095	299095	origins	CDS	ID=TcCLB.506733.110:mRNA-p1-CDS1;Parent=TcCLB.506733.110:mRNA;gene_id=TcCLB.506733.110;protein_source_id=TcCLB.506733.110:mRNA-p1
TcChr14-S	297095	299095	origins	exon	ID=exon_TcCLB.506733.110:mRNA-E1;Parent=TcCLB.506733.110:mRNA;gene_id=TcCLB.506733.110
TcChr14-S	297095	299095	origins	mRNA	ID=TcCLB.506733.110:mRNA;Parent=TcCLB.506733.110;description=hypothetical
TcChr14-S	297095	299095	origins	protein_coding_gene	ID=TcCLB.506733.110;description=hypothetical
TcChr14-S	297095	299095	origins	CDS	ID=TcCLB.506733.100:mRNA-p1-CDS1;Parent=TcCLB.506733.100:mRNA;gene_id=TcCLB.506733.100;protein_source_id=TcCLB.506733.100:mRNA-p1
TcChr14-S	297095	299095	origins	exon	ID=exon_TcCLB.506733.100:mRNA-E1;Parent=TcCLB.506733.100:mRNA;gene_id=TcCLB.506733.100
TcChr14-S	297095	299095	origins	mRNA	ID=TcCLB.506733.100:mRNA;Parent=TcCLB.506733.100;description=hypothetical
TcChr14-S	297095	299095	origins	protein_coding_gene	ID=TcCLB.506733.100;description=hypothetical
TcChr14-S	297095	299095	origins	polycistron-CDS	ID=polycistron-CDS_23;contentCount=105;content=TcCLB.506737.70:mRNA-p1-CDS1,TcCLB.506737.60:mRNA-p1-CDS1,TcCLB.506737.50:mRNA-p1-CDS1,TcCLB.506737.40:mRNA-p1-CDS1,TcCLB.506737.30:mRNA-p1-CDS1,TcCLB.506737.20:mRNA-p1-CDS1,TcCLB.506737.10:mRNA-p1-CDS1,TcCLB.506735.80:mRNA-p1-CDS1,TcCLB.506735.70:mRNA-p1-CDS1,TcCLB.506735.60:mRNA-p1-CDS1,TcCLB.506735.50:mRNA-p1-CDS1,TcCLB.506735.40:mRNA-p1-CDS1,TcCL…
TcChr14-S	307986	309986	origins	CDS	ID=TcCLB.506733.60:mRNA-p1-CDS1;Parent=TcCLB.506733.60:mRNA;gene_id=TcCLB.506733.60;protein_source_id=TcCLB.506733.60:mRNA-p1
TcChr14-S	307986	309986	origins	exon	ID=exon_TcCLB.506733.60:mRNA-E1;Parent=TcCLB.506733.60:mRNA;gene_id=TcCLB.506733.60
TcChr14-S	307986	309986	origins	mRNA	ID=TcCLB.506733.60:mRNA;Parent=TcCLB.506733.60;description=N(2)%2C
TcChr14-S	307986	309986	origins	protein_coding_gene	ID=TcCLB.506733.60;description=N(2)%2C
TcChr14-S	307986	309986	origins	polycistron-CDS	ID=polycistron-CDS_23;contentCount=105;content=TcCLB.506737.70:mRNA-p1-CDS1,TcCLB.506737.60:mRNA-p1-CDS1,TcCLB.506737.50:mRNA-p1-CDS1,TcCLB.506737.40:mRNA-p1-CDS1,TcCLB.506737.30:mRNA-p1-CDS1,TcCLB.506737.20:mRNA-p1-CDS1,TcCLB.506737.10:mRNA-p1-CDS1,TcCLB.506735.80:mRNA-p1-CDS1,TcCLB.506735.70:mRNA-p1-CDS1,TcCLB.506735.60:mRNA-p1-CDS1,TcCLB.506735.50:mRNA-p1-CDS1,TcCLB.506735.40:mRNA-p1-CDS1,TcCL…
TcChr14-S	314222	316222	origins	CDS	ID=TcCLB.506733.30:mRNA-p1-CDS1;Parent=TcCLB.506733.30:mRNA;gene_id=TcCLB.506733.30;protein_source_id=TcCLB.506733.30:mRNA-p1
TcChr14-S	314222	316222	origins	exon	ID=exon_TcCLB.506733.30:mRNA-E1;Parent=TcCLB.506733.30:mRNA;gene_id=TcCLB.506733.30
TcChr14-S	314222	316222	origins	mRNA	ID=TcCLB.506733.30:mRNA;Parent=TcCLB.506733.30;description=hypothetical
TcChr14-S	314222	316222	origins	protein_coding_gene	ID=TcCLB.506733.30;description=hypothetical
TcChr14-S	314222	316222	origins	polycistron-CDS	ID=polycistron-CDS_23;contentCount=105;content=TcCLB.506737.70:mRNA-p1-CDS1,TcCLB.506737.60:mRNA-p1-CDS1,TcCLB.506737.50:mRNA-p1-CDS1,TcCLB.506737.40:mRNA-p1-CDS1,TcCLB.506737.30:mRNA-p1-CDS1,TcCLB.506737.20:mRNA-p1-CDS1,TcCLB.506737.10:mRNA-p1-CDS1,TcCLB.506735.80:mRNA-p1-CDS1,TcCLB.506735.70:mRNA-p1-CDS1,TcCLB.506735.60:mRNA-p1-CDS1,TcCLB.506735.50:mRNA-p1-CDS1,TcCLB.506735.40:mRNA-p1-CDS1,TcCL…
TcChr14-S	320194	322194	origins	CDS	ID=TcCLB.506733.20:mRNA-p1-CDS1;Parent=TcCLB.506733.20:mRNA;gene_id=TcCLB.506733.20;protein_source_id=TcCLB.506733.20:mRNA-p1
TcChr14-S	320194	322194	origins	exon	ID=exon_TcCLB.506733.20:mRNA-E1;Parent=TcCLB.506733.20:mRNA;gene_id=TcCLB.506733.20
TcChr14-S	320194	322194	origins	mRNA	ID=TcCLB.506733.20:mRNA;Parent=TcCLB.506733.20;description=AMP
TcChr14-S	320194	322194	origins	protein_coding_gene	ID=TcCLB.506733.20;description=AMP
TcChr14-S	320194	322194	origins	CDS	ID=TcCLB.506733.10:mRNA-p1-CDS1;Parent=TcCLB.506733.10:mRNA;gene_id=TcCLB.506733.10;protein_source_id=TcCLB.506733.10:mRNA-p1
TcChr14-S	320194	322194	origins	exon	ID=exon_TcCLB.506733.10:mRNA-E1;Parent=TcCLB.506733.10:mRNA;gene_id=TcCLB.506733.10
TcChr14-S	320194	322194	origins	mRNA	ID=TcCLB.506733.10:mRNA;Parent=TcCLB.506733.10;description=hypothetical
TcChr14-S	320194	322194	origins	protein_coding_gene	ID=TcCLB.506733.10;description=hypothetical
TcChr14-S	320194	322194	origins	polycistron-CDS	ID=polycistron-CDS_23;contentCount=105;content=TcCLB.506737.70:mRNA-p1-CDS1,TcCLB.506737.60:mRNA-p1-CDS1,TcCLB.506737.50:mRNA-p1-CDS1,TcCLB.506737.40:mRNA-p1-CDS1,TcCLB.506737.30:mRNA-p1-CDS1,TcCLB.506737.20:mRNA-p1-CDS1,TcCLB.506737.10:mRNA-p1-CDS1,TcCLB.506735.80:mRNA-p1-CDS1,TcCLB.506735.70:mRNA-p1-CDS1,TcCLB.506735.60:mRNA-p1-CDS1,TcCLB.506735.50:mRNA-p1-CDS1,TcCLB.506735.40:mRNA-p1-CDS1,TcCL…
TcChr14-S	325622	327622	origins	CDS	ID=TcCLB.511045.20:mRNA-p1-CDS1;Parent=TcCLB.511045.20:mRNA;gene_id=TcCLB.511045.20;protein_source_id=TcCLB.511045.20:mRNA-p1
TcChr14-S	325622	327622	origins	exon	ID=exon_TcCLB.511045.20:mRNA-E1;Parent=TcCLB.511045.20:mRNA;gene_id=TcCLB.511045.20
TcChr14-S	325622	327622	origins	mRNA	ID=TcCLB.511045.20:mRNA;Parent=TcCLB.511045.20;description=hypothetical
TcChr14-S	325622	327622	origins	protein_coding_gene	ID=TcCLB.511045.20;description=hypothetical
TcChr14-S	325622	327622	origins	CDS	ID=TcCLB.511045.29:mRNA-p1-CDS1;Parent=TcCLB.511045.29:mRNA;gene_id=TcCLB.511045.29;protein_source_id=TcCLB.511045.29:mRNA-p1
TcChr14-S	325622	327622	origins	exon	ID=exon_TcCLB.511045.29:mRNA-E1;Parent=TcCLB.511045.29:mRNA;gene_id=TcCLB.511045.29
TcChr14-S	325622	327622	origins	mRNA	ID=TcCLB.511045.29:mRNA;Parent=TcCLB.511045.29;description=hypothetical
TcChr14-S	325622	327622	origins	protein_coding_gene	ID=TcCLB.511045.29;description=hypothetical
TcChr14-S	325622	327622	origins	polycistron-CDS	ID=polycistron-CDS_23;contentCount=105;content=TcCLB.506737.70:mRNA-p1-CDS1,TcCLB.506737.60:mRNA-p1-CDS1,TcCLB.506737.50:mRNA-p1-CDS1,TcCLB.506737.40:mRNA-p1-CDS1,TcCLB.506737.30:mRNA-p1-CDS1,TcCLB.506737.20:mRNA-p1-CDS1,TcCLB.506737.10:mRNA-p1-CDS1,TcCLB.506735.80:mRNA-p1-CDS1,TcCLB.506735.70:mRNA-p1-CDS1,TcCLB.506735.60:mRNA-p1-CDS1,TcCLB.506735.50:mRNA-p1-CDS1,TcCLB.506735.40:mRNA-p1-CDS1,TcCL…
TcChr14-S	329302	331302	origins	CDS	ID=TcCLB.511045.40:mRNA-p1-CDS1;Parent=TcCLB.511045.40:mRNA;gene_id=TcCLB.511045.40;protein_source_id=TcCLB.511045.40:mRNA-p1
TcChr14-S	329302	331302	origins	exon	ID=exon_TcCLB.511045.40:mRNA-E1;Parent=TcCLB.511045.40:mRNA;gene_id=TcCLB.511045.40
TcChr14-S	329302	331302	origins	mRNA	ID=TcCLB.511045.40:mRNA;Parent=TcCLB.511045.40;description=subtilisin
TcChr14-S	329302	331302	origins	protein_coding_gene	ID=TcCLB.511045.40;description=subtilisin
TcChr14-S	329302	331302	origins	polycistron-CDS	ID=polycistron-CDS_23;contentCount=105;content=TcCLB.506737.70:mRNA-p1-CDS1,TcCLB.506737.60:mRNA-p1-CDS1,TcCLB.506737.50:mRNA-p1-CDS1,TcCLB.506737.40:mRNA-p1-CDS1,TcCLB.506737.30:mRNA-p1-CDS1,TcCLB.506737.20:mRNA-p1-CDS1,TcCLB.506737.10:mRNA-p1-CDS1,TcCLB.506735.80:mRNA-p1-CDS1,TcCLB.506735.70:mRNA-p1-CDS1,TcCLB.506735.60:mRNA-p1-CDS1,TcCLB.506735.50:mRNA-p1-CDS1,TcCLB.506735.40:mRNA-p1-CDS1,TcCL…
TcChr14-S	355352	357352	origins	CDS	ID=TcCLB.511047.40:mRNA-p1-CDS1;Parent=TcCLB.511047.40:mRNA;gene_id=TcCLB.511047.40;protein_source_id=TcCLB.511047.40:mRNA-p1
TcChr14-S	355352	357352	origins	exon	ID=exon_TcCLB.511047.40:mRNA-E1;Parent=TcCLB.511047.40:mRNA;gene_id=TcCLB.511047.40
TcChr14-S	355352	357352	origins	mRNA	ID=TcCLB.511047.40:mRNA;Parent=TcCLB.511047.40;Note=1.6.2.2
TcChr14-S	355352	357352	origins	protein_coding_gene	ID=TcCLB.511047.40;description=NADH-cytochrome
TcChr14-S	355352	357352	origins	polycistron-CDS	ID=polycistron-CDS_23;contentCount=105;content=TcCLB.506737.70:mRNA-p1-CDS1,TcCLB.506737.60:mRNA-p1-CDS1,TcCLB.506737.50:mRNA-p1-CDS1,TcCLB.506737.40:mRNA-p1-CDS1,TcCLB.506737.30:mRNA-p1-CDS1,TcCLB.506737.20:mRNA-p1-CDS1,TcCLB.506737.10:mRNA-p1-CDS1,TcCLB.506735.80:mRNA-p1-CDS1,TcCLB.506735.70:mRNA-p1-CDS1,TcCLB.506735.60:mRNA-p1-CDS1,TcCLB.506735.50:mRNA-p1-CDS1,TcCLB.506735.40:mRNA-p1-CDS1,TcCL…
TcChr14-S	359144	361144	origins	CDS	ID=TcCLB.511047.70:mRNA-p1-CDS1;Parent=TcCLB.511047.70:mRNA;gene_id=TcCLB.511047.70;protein_source_id=TcCLB.511047.70:mRNA-p1
TcChr14-S	359144	361144	origins	exon	ID=exon_TcCLB.511047.70:mRNA-E1;Parent=TcCLB.511047.70:mRNA;gene_id=TcCLB.511047.70
TcChr14-S	359144	361144	origins	mRNA	ID=TcCLB.511047.70:mRNA;Parent=TcCLB.511047.70;description=hypothetical
TcChr14-S	359144	361144	origins	protein_coding_gene	ID=TcCLB.511047.70;description=hypothetical
TcChr14-S	359144	361144	origins	polycistron-CDS	ID=polycistron-CDS_23;contentCount=105;content=TcCLB.506737.70:mRNA-p1-CDS1,TcCLB.506737.60:mRNA-p1-CDS1,TcCLB.506737.50:mRNA-p1-CDS1,TcCLB.506737.40:mRNA-p1-CDS1,TcCLB.506737.30:mRNA-p1-CDS1,TcCLB.506737.20:mRNA-p1-CDS1,TcCLB.506737.10:mRNA-p1-CDS1,TcCLB.506735.80:mRNA-p1-CDS1,TcCLB.506735.70:mRNA-p1-CDS1,TcCLB.506735.60:mRNA-p1-CDS1,TcCLB.506735.50:mRNA-p1-CDS1,TcCLB.506735.40:mRNA-p1-CDS1,TcCL…
TcChr14-S	374396	376396	origins	CDS	ID=TcCLB.504087.10:mRNA-p1-CDS1;Parent=TcCLB.504087.10:mRNA;gene_id=TcCLB.504087.10;protein_source_id=TcCLB.504087.10:mRNA-p1
TcChr14-S	374396	376396	origins	exon	ID=exon_TcCLB.504087.10:mRNA-E1;Parent=TcCLB.504087.10:mRNA;gene_id=TcCLB.504087.10
TcChr14-S	374396	376396	origins	mRNA	ID=TcCLB.504087.10:mRNA;Parent=TcCLB.504087.10;description=Ring
TcChr14-S	374396	376396	origins	protein_coding_gene	ID=TcCLB.504087.10;description=Ring
TcChr14-S	374396	376396	origins	polycistron-CDS	ID=polycistron-CDS_23;contentCount=105;content=TcCLB.506737.70:mRNA-p1-CDS1,TcCLB.506737.60:mRNA-p1-CDS1,TcCLB.506737.50:mRNA-p1-CDS1,TcCLB.506737.40:mRNA-p1-CDS1,TcCLB.506737.30:mRNA-p1-CDS1,TcCLB.506737.20:mRNA-p1-CDS1,TcCLB.506737.10:mRNA-p1-CDS1,TcCLB.506735.80:mRNA-p1-CDS1,TcCLB.506735.70:mRNA-p1-CDS1,TcCLB.506735.60:mRNA-p1-CDS1,TcCLB.506735.50:mRNA-p1-CDS1,TcCLB.506735.40:mRNA-p1-CDS1,TcCL…
TcChr14-S	385402	387402	origins	CDS	ID=TcCLB.504087.20:mRNA-p1-CDS1;Parent=TcCLB.504087.20:mRNA;gene_id=TcCLB.504087.20;protein_source_id=TcCLB.504087.20:mRNA-p1
TcChr14-S	385402	387402	origins	exon	ID=exon_TcCLB.504087.20:mRNA-E1;Parent=TcCLB.504087.20:mRNA;gene_id=TcCLB.504087.20
TcChr14-S	385402	387402	origins	mRNA	ID=TcCLB.504087.20:mRNA;Parent=TcCLB.504087.20;description=hypothetical
TcChr14-S	385402	387402	origins	protein_coding_gene	ID=TcCLB.504087.20;description=hypothetical
TcChr14-S	385402	387402	origins	polycistron-CDS	ID=polycistron-CDS_23;contentCount=105;content=TcCLB.506737.70:mRNA-p1-CDS1,TcCLB.506737.60:mRNA-p1-CDS1,TcCLB.506737.50:mRNA-p1-CDS1,TcCLB.506737.40:mRNA-p1-CDS1,TcCLB.506737.30:mRNA-p1-CDS1,TcCLB.506737.20:mRNA-p1-CDS1,TcCLB.506737.10:mRNA-p1-CDS1,TcCLB.506735.80:mRNA-p1-CDS1,TcCLB.506735.70:mRNA-p1-CDS1,TcCLB.506735.60:mRNA-p1-CDS1,TcCLB.506735.50:mRNA-p1-CDS1,TcCLB.506735.40:mRNA-p1-CDS1,TcCL…
TcChr14-S	397720	399720	origins	CDS	ID=TcCLB.508731.20:mRNA-p1-CDS1;Parent=TcCLB.508731.20:mRNA;gene_id=TcCLB.508731.20;protein_source_id=TcCLB.508731.20:mRNA-p1
TcChr14-S	397720	399720	origins	exon	ID=exon_TcCLB.508731.20:mRNA-E1;Parent=TcCLB.508731.20:mRNA;gene_id=TcCLB.508731.20
TcChr14-S	397720	399720	origins	mRNA	ID=TcCLB.508731.20:mRNA;Parent=TcCLB.508731.20;description=Alpha/beta
TcChr14-S	397720	399720	origins	protein_coding_gene	ID=TcCLB.508731.20;description=Alpha/beta
TcChr14-S	397720	399720	origins	CDS	ID=TcCLB.508731.30:mRNA-p1-CDS1;Parent=TcCLB.508731.30:mRNA;gene_id=TcCLB.508731.30;protein_source_id=TcCLB.508731.30:mRNA-p1
TcChr14-S	397720	399720	origins	exon	ID=exon_TcCLB.508731.30:mRNA-E1;Parent=TcCLB.508731.30:mRNA;gene_id=TcCLB.508731.30
TcChr14-S	397720	399720	origins	mRNA	ID=TcCLB.508731.30:mRNA;Parent=TcCLB.508731.30;description=calmodulin%2C
TcChr14-S	397720	399720	origins	protein_coding_gene	ID=TcCLB.508731.30;description=calmodulin%2C
TcChr14-S	397720	399720	origins	CDS	ID=TcCLB.508731.40:mRNA-p1-CDS1;Parent=TcCLB.508731.40:mRNA;gene_id=TcCLB.508731.40;protein_source_id=TcCLB.508731.40:mRNA-p1
TcChr14-S	397720	399720	origins	exon	ID=exon_TcCLB.508731.40:mRNA-E1;Parent=TcCLB.508731.40:mRNA;gene_id=TcCLB.508731.40
TcChr14-S	397720	399720	origins	mRNA	ID=TcCLB.508731.40:mRNA;Parent=TcCLB.508731.40;description=hypothetical
TcChr14-S	397720	399720	origins	protein_coding_gene	ID=TcCLB.508731.40;description=hypothetical
TcChr14-S	397720	399720	origins	polycistron-CDS	ID=polycistron-CDS_23;contentCount=105;content=TcCLB.506737.70:mRNA-p1-CDS1,TcCLB.506737.60:mRNA-p1-CDS1,TcCLB.506737.50:mRNA-p1-CDS1,TcCLB.506737.40:mRNA-p1-CDS1,TcCLB.506737.30:mRNA-p1-CDS1,TcCLB.506737.20:mRNA-p1-CDS1,TcCLB.506737.10:mRNA-p1-CDS1,TcCLB.506735.80:mRNA-p1-CDS1,TcCLB.506735.70:mRNA-p1-CDS1,TcCLB.506735.60:mRNA-p1-CDS1,TcCLB.506735.50:mRNA-p1-CDS1,TcCLB.506735.40:mRNA-p1-CDS1,TcCL…
TcChr14-S	403451	405451	origins	CDS	ID=TcCLB.508731.60:mRNA-p1-CDS1;Parent=TcCLB.508731.60:mRNA;gene_id=TcCLB.508731.60;protein_source_id=TcCLB.508731.60:mRNA-p1
TcChr14-S	403451	405451	origins	exon	ID=exon_TcCLB.508731.60:mRNA-E1;Parent=TcCLB.508731.60:mRNA;gene_id=TcCLB.508731.60
TcChr14-S	403451	405451	origins	mRNA	ID=TcCLB.508731.60:mRNA;Parent=TcCLB.508731.60;Note=6.3.4.4
TcChr14-S	403451	405451	origins	protein_coding_gene	ID=TcCLB.508731.60;description=adenylosuccinate
TcChr14-S	403451	405451	origins	polycistron-CDS	ID=polycistron-CDS_23;contentCount=105;content=TcCLB.506737.70:mRNA-p1-CDS1,TcCLB.506737.60:mRNA-p1-CDS1,TcCLB.506737.50:mRNA-p1-CDS1,TcCLB.506737.40:mRNA-p1-CDS1,TcCLB.506737.30:mRNA-p1-CDS1,TcCLB.506737.20:mRNA-p1-CDS1,TcCLB.506737.10:mRNA-p1-CDS1,TcCLB.506735.80:mRNA-p1-CDS1,TcCLB.506735.70:mRNA-p1-CDS1,TcCLB.506735.60:mRNA-p1-CDS1,TcCLB.506735.50:mRNA-p1-CDS1,TcCLB.506735.40:mRNA-p1-CDS1,TcCL…
TcChr14-S	408433	410433	origins	CDS	ID=TcCLB.511051.20:mRNA-p1-CDS1;Parent=TcCLB.511051.20:mRNA;gene_id=TcCLB.511051.20;protein_source_id=TcCLB.511051.20:mRNA-p1
TcChr14-S	408433	410433	origins	exon	ID=exon_TcCLB.511051.20:mRNA-E1;Parent=TcCLB.511051.20:mRNA;gene_id=TcCLB.511051.20
TcChr14-S	408433	410433	origins	mRNA	ID=TcCLB.511051.20:mRNA;Parent=TcCLB.511051.20;description=Mitochondrial
TcChr14-S	408433	410433	origins	protein_coding_gene	ID=TcCLB.511051.20;Name=bL27m;description=Mitochondrial
TcChr14-S	408433	410433	origins	polycistron-CDS	ID=polycistron-CDS_23;contentCount=105;content=TcCLB.506737.70:mRNA-p1-CDS1,TcCLB.506737.60:mRNA-p1-CDS1,TcCLB.506737.50:mRNA-p1-CDS1,TcCLB.506737.40:mRNA-p1-CDS1,TcCLB.506737.30:mRNA-p1-CDS1,TcCLB.506737.20:mRNA-p1-CDS1,TcCLB.506737.10:mRNA-p1-CDS1,TcCLB.506735.80:mRNA-p1-CDS1,TcCLB.506735.70:mRNA-p1-CDS1,TcCLB.506735.60:mRNA-p1-CDS1,TcCLB.506735.50:mRNA-p1-CDS1,TcCLB.506735.40:mRNA-p1-CDS1,TcCL…
TcChr14-S	420239	422239	origins	CDS	ID=TcCLB.511051.70:mRNA-p1-CDS1;Parent=TcCLB.511051.70:mRNA;gene_id=TcCLB.511051.70;protein_source_id=TcCLB.511051.70:mRNA-p1
TcChr14-S	420239	422239	origins	exon	ID=exon_TcCLB.511051.70:mRNA-E1;Parent=TcCLB.511051.70:mRNA;gene_id=TcCLB.511051.70
TcChr14-S	420239	422239	origins	mRNA	ID=TcCLB.511051.70:mRNA;Parent=TcCLB.511051.70;description=metallo-peptidase%2C
TcChr14-S	420239	422239	origins	protein_coding_gene	ID=TcCLB.511051.70;description=metallo-peptidase%2C
TcChr14-S	420239	422239	origins	CDS	ID=TcCLB.511051.80:mRNA-p1-CDS1;Parent=TcCLB.511051.80:mRNA;gene_id=TcCLB.511051.80;protein_source_id=TcCLB.511051.80:mRNA-p1
TcChr14-S	420239	422239	origins	exon	ID=exon_TcCLB.511051.80:mRNA-E1;Parent=TcCLB.511051.80:mRNA;gene_id=TcCLB.511051.80
TcChr14-S	420239	422239	origins	mRNA	ID=TcCLB.511051.80:mRNA;Parent=TcCLB.511051.80;description=DNA/RNA
TcChr14-S	420239	422239	origins	protein_coding_gene	ID=TcCLB.511051.80;description=DNA/RNA
TcChr14-S	420239	422239	origins	polycistron-CDS	ID=polycistron-CDS_23;contentCount=105;content=TcCLB.506737.70:mRNA-p1-CDS1,TcCLB.506737.60:mRNA-p1-CDS1,TcCLB.506737.50:mRNA-p1-CDS1,TcCLB.506737.40:mRNA-p1-CDS1,TcCLB.506737.30:mRNA-p1-CDS1,TcCLB.506737.20:mRNA-p1-CDS1,TcCLB.506737.10:mRNA-p1-CDS1,TcCLB.506735.80:mRNA-p1-CDS1,TcCLB.506735.70:mRNA-p1-CDS1,TcCLB.506735.60:mRNA-p1-CDS1,TcCLB.506735.50:mRNA-p1-CDS1,TcCLB.506735.40:mRNA-p1-CDS1,TcCL…
TcChr14-S	435887	437887	origins	CDS	ID=TcCLB.504011.80:mRNA-p1-CDS1;Parent=TcCLB.504011.80:mRNA;gene_id=TcCLB.504011.80;protein_source_id=TcCLB.504011.80:mRNA-p1
TcChr14-S	435887	437887	origins	exon	ID=exon_TcCLB.504011.80:mRNA-E1;Parent=TcCLB.504011.80:mRNA;gene_id=TcCLB.504011.80
TcChr14-S	435887	437887	origins	mRNA	ID=TcCLB.504011.80:mRNA;Parent=TcCLB.504011.80;description=hypothetical
TcChr14-S	435887	437887	origins	protein_coding_gene	ID=TcCLB.504011.80;description=hypothetical
TcChr14-S	435887	437887	origins	polycistron-CDS	ID=polycistron-CDS_23;contentCount=105;content=TcCLB.506737.70:mRNA-p1-CDS1,TcCLB.506737.60:mRNA-p1-CDS1,TcCLB.506737.50:mRNA-p1-CDS1,TcCLB.506737.40:mRNA-p1-CDS1,TcCLB.506737.30:mRNA-p1-CDS1,TcCLB.506737.20:mRNA-p1-CDS1,TcCLB.506737.10:mRNA-p1-CDS1,TcCLB.506735.80:mRNA-p1-CDS1,TcCLB.506735.70:mRNA-p1-CDS1,TcCLB.506735.60:mRNA-p1-CDS1,TcCLB.506735.50:mRNA-p1-CDS1,TcCLB.506735.40:mRNA-p1-CDS1,TcCL…
TcChr14-S	441981	443981	origins	polycistron-CDS	ID=polycistron-CDS_23;contentCount=105;content=TcCLB.506737.70:mRNA-p1-CDS1,TcCLB.506737.60:mRNA-p1-CDS1,TcCLB.506737.50:mRNA-p1-CDS1,TcCLB.506737.40:mRNA-p1-CDS1,TcCLB.506737.30:mRNA-p1-CDS1,TcCLB.506737.20:mRNA-p1-CDS1,TcCLB.506737.10:mRNA-p1-CDS1,TcCLB.506735.80:mRNA-p1-CDS1,TcCLB.506735.70:mRNA-p1-CDS1,TcCLB.506735.60:mRNA-p1-CDS1,TcCLB.506735.50:mRNA-p1-CDS1,TcCLB.506735.40:mRNA-p1-CDS1,TcCL…
TcChr14-S	451745	453745	origins	CDS	ID=TcCLB.507631.10:mRNA-p1-CDS1;Parent=TcCLB.507631.10:mRNA;gene_id=TcCLB.507631.10;protein_source_id=TcCLB.507631.10:mRNA-p1
TcChr14-S	451745	453745	origins	exon	ID=exon_TcCLB.507631.10:mRNA-E1;Parent=TcCLB.507631.10:mRNA;gene_id=TcCLB.507631.10
TcChr14-S	451745	453745	origins	mRNA	ID=TcCLB.507631.10:mRNA;Parent=TcCLB.507631.10;description=hypothetical
TcChr14-S	451745	453745	origins	protein_coding_gene	ID=TcCLB.507631.10;description=hypothetical
TcChr14-S	451745	453745	origins	CDS	ID=TcCLB.507629.39:mRNA-p1-CDS1;Parent=TcCLB.507629.39:mRNA;gene_id=TcCLB.507629.39;protein_source_id=TcCLB.507629.39:mRNA-p1
TcChr14-S	451745	453745	origins	exon	ID=exon_TcCLB.507629.39:mRNA-E1;Parent=TcCLB.507629.39:mRNA;gene_id=TcCLB.507629.39
TcChr14-S	451745	453745	origins	mRNA	ID=TcCLB.507629.39:mRNA;Parent=TcCLB.507629.39;description=hypothetical
TcChr14-S	451745	453745	origins	protein_coding_gene	ID=TcCLB.507629.39;description=hypothetical
TcChr14-S	451745	453745	origins	polycistron-CDS	ID=polycistron-CDS_23;contentCount=105;content=TcCLB.506737.70:mRNA-p1-CDS1,TcCLB.506737.60:mRNA-p1-CDS1,TcCLB.506737.50:mRNA-p1-CDS1,TcCLB.506737.40:mRNA-p1-CDS1,TcCLB.506737.30:mRNA-p1-CDS1,TcCLB.506737.20:mRNA-p1-CDS1,TcCLB.506737.10:mRNA-p1-CDS1,TcCLB.506735.80:mRNA-p1-CDS1,TcCLB.506735.70:mRNA-p1-CDS1,TcCLB.506735.60:mRNA-p1-CDS1,TcCLB.506735.50:mRNA-p1-CDS1,TcCLB.506735.40:mRNA-p1-CDS1,TcCL…
TcChr14-S	457425	459425	origins	CDS	ID=TcCLB.507629.30:mRNA-p1-CDS1;Parent=TcCLB.507629.30:mRNA;gene_id=TcCLB.507629.30;protein_source_id=TcCLB.507629.30:mRNA-p1
TcChr14-S	457425	459425	origins	exon	ID=exon_TcCLB.507629.30:mRNA-E1;Parent=TcCLB.507629.30:mRNA;gene_id=TcCLB.507629.30
TcChr14-S	457425	459425	origins	mRNA	ID=TcCLB.507629.30:mRNA;Parent=TcCLB.507629.30;description=Dpy-30
TcChr14-S	457425	459425	origins	protein_coding_gene	ID=TcCLB.507629.30;description=Dpy-30
TcChr14-S	457425	459425	origins	CDS	ID=TcCLB.507629.20:mRNA-p1-CDS1;Parent=TcCLB.507629.20:mRNA;gene_id=TcCLB.507629.20;protein_source_id=TcCLB.507629.20:mRNA-p1
TcChr14-S	457425	459425	origins	exon	ID=exon_TcCLB.507629.20:mRNA-E1;Parent=TcCLB.507629.20:mRNA;gene_id=TcCLB.507629.20
TcChr14-S	457425	459425	origins	mRNA	ID=TcCLB.507629.20:mRNA;Parent=TcCLB.507629.20;description=hypothetical
TcChr14-S	457425	459425	origins	protein_coding_gene	ID=TcCLB.507629.20;description=hypothetical
TcChr14-S	457425	459425	origins	polycistron-CDS	ID=polycistron-CDS_23;contentCount=105;content=TcCLB.506737.70:mRNA-p1-CDS1,TcCLB.506737.60:mRNA-p1-CDS1,TcCLB.506737.50:mRNA-p1-CDS1,TcCLB.506737.40:mRNA-p1-CDS1,TcCLB.506737.30:mRNA-p1-CDS1,TcCLB.506737.20:mRNA-p1-CDS1,TcCLB.506737.10:mRNA-p1-CDS1,TcCLB.506735.80:mRNA-p1-CDS1,TcCLB.506735.70:mRNA-p1-CDS1,TcCLB.506735.60:mRNA-p1-CDS1,TcCLB.506735.50:mRNA-p1-CDS1,TcCLB.506735.40:mRNA-p1-CDS1,TcCL…
TcChr14-S	465184	467184	origins	CDS	ID=TcCLB.507099.140:mRNA-p1-CDS1;Parent=TcCLB.507099.140:mRNA;gene_id=TcCLB.507099.140;protein_source_id=TcCLB.507099.140:mRNA-p1
TcChr14-S	465184	467184	origins	exon	ID=exon_TcCLB.507099.140:mRNA-E1;Parent=TcCLB.507099.140:mRNA;gene_id=TcCLB.507099.140
TcChr14-S	465184	467184	origins	mRNA	ID=TcCLB.507099.140:mRNA;Parent=TcCLB.507099.140;description=endomembrane
TcChr14-S	465184	467184	origins	protein_coding_gene	ID=TcCLB.507099.140;description=endomembrane
TcChr14-S	465184	467184	origins	polycistron-CDS	ID=polycistron-CDS_23;contentCount=105;content=TcCLB.506737.70:mRNA-p1-CDS1,TcCLB.506737.60:mRNA-p1-CDS1,TcCLB.506737.50:mRNA-p1-CDS1,TcCLB.506737.40:mRNA-p1-CDS1,TcCLB.506737.30:mRNA-p1-CDS1,TcCLB.506737.20:mRNA-p1-CDS1,TcCLB.506737.10:mRNA-p1-CDS1,TcCLB.506735.80:mRNA-p1-CDS1,TcCLB.506735.70:mRNA-p1-CDS1,TcCLB.506735.60:mRNA-p1-CDS1,TcCLB.506735.50:mRNA-p1-CDS1,TcCLB.506735.40:mRNA-p1-CDS1,TcCL…
TcChr14-S	471763	473763	origins	polycistron-CDS	ID=polycistron-CDS_23;contentCount=105;content=TcCLB.506737.70:mRNA-p1-CDS1,TcCLB.506737.60:mRNA-p1-CDS1,TcCLB.506737.50:mRNA-p1-CDS1,TcCLB.506737.40:mRNA-p1-CDS1,TcCLB.506737.30:mRNA-p1-CDS1,TcCLB.506737.20:mRNA-p1-CDS1,TcCLB.506737.10:mRNA-p1-CDS1,TcCLB.506735.80:mRNA-p1-CDS1,TcCLB.506735.70:mRNA-p1-CDS1,TcCLB.506735.60:mRNA-p1-CDS1,TcCLB.506735.50:mRNA-p1-CDS1,TcCLB.506735.40:mRNA-p1-CDS1,TcCL…
[truncated: 27,049 more rows]

## Sheet: Table-S5
ST5. Polycistron classification
[truncated: 794 more rows]

[truncated: 2 more sheets: Table-S6, Table-S7]
